# Supplementary material for: ScanFold: an approach for genome-wide discovery of local RNA structural elements—applications to Zika virus and HIV
Source: PubMed Central journal article supplement (PMC6317755; doi:10.7717/peerj.6136), 2018-12-18
Supplement: peerj-06-6136-s003.pdf [file peerj-06-6136-s003.pdf]

**a**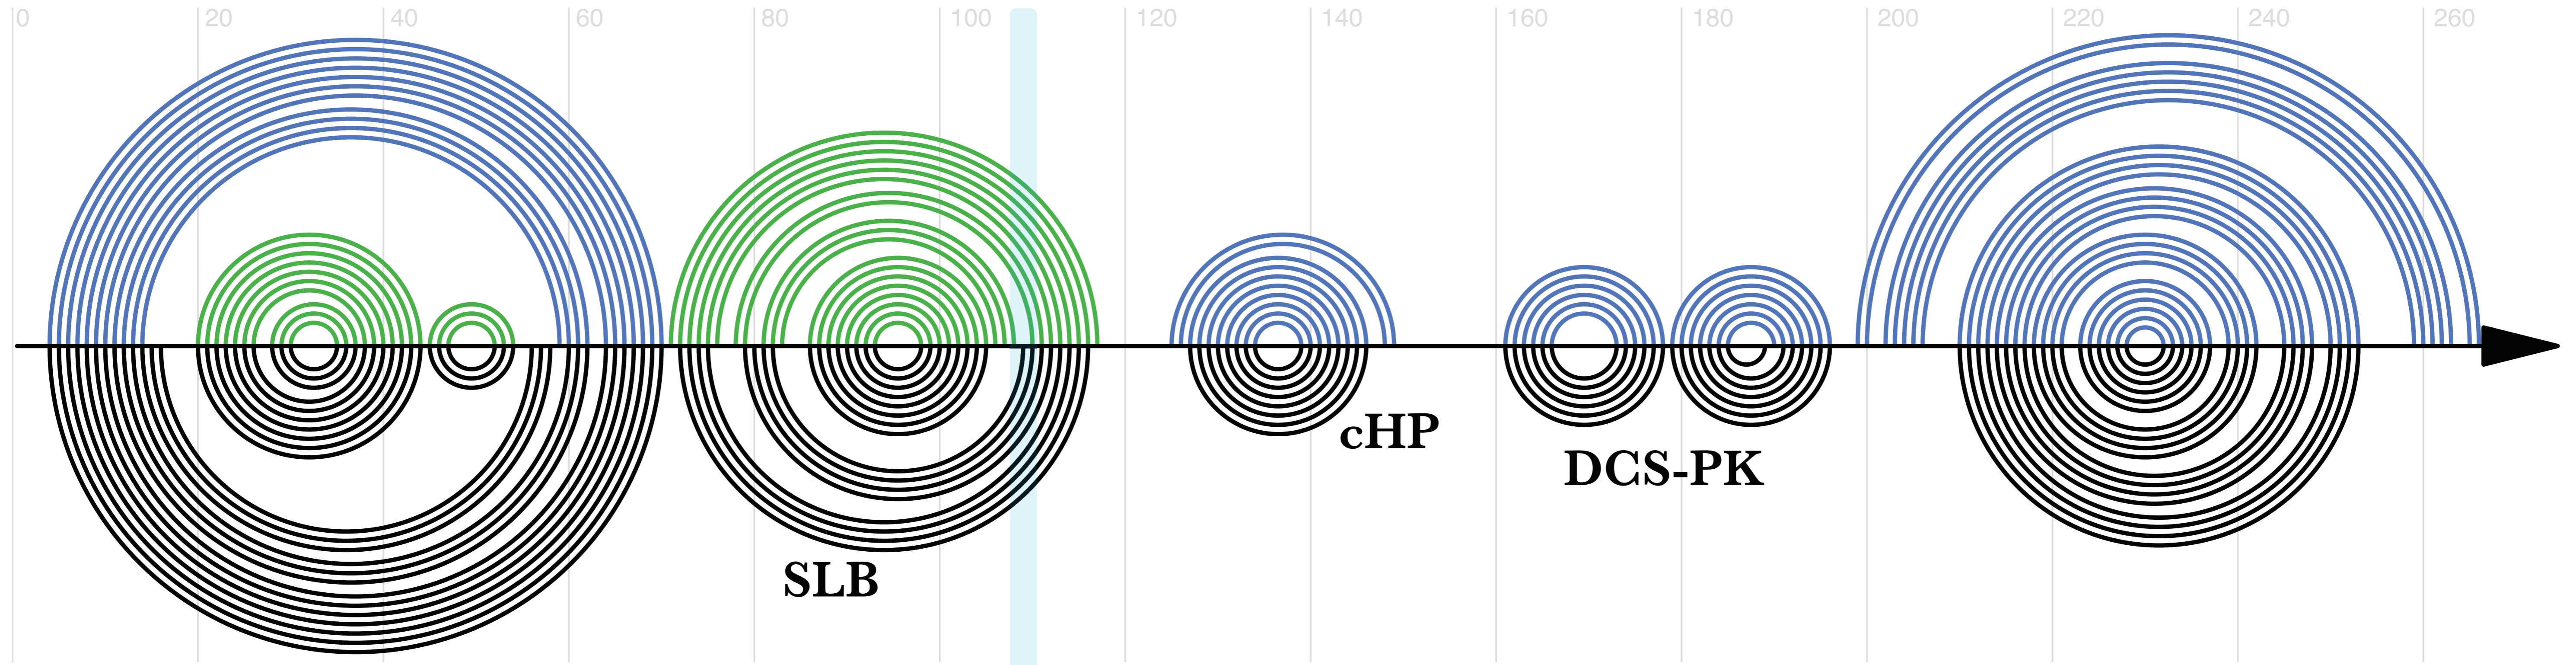**b**

- ScanFold base pair:  $Z_{\text{avg}} < -1$
- ScanFold base pair:  $Z_{\text{avg}} < -2$
- Accepted base pair
