# Supplementary material for: ScanFold: an approach for genome-wide discovery of local RNA structural elements—applications to Zika virus and HIV
Source: PeerJ journal article supplement (doi:10.7717/peerj.6136), 2018-12-18

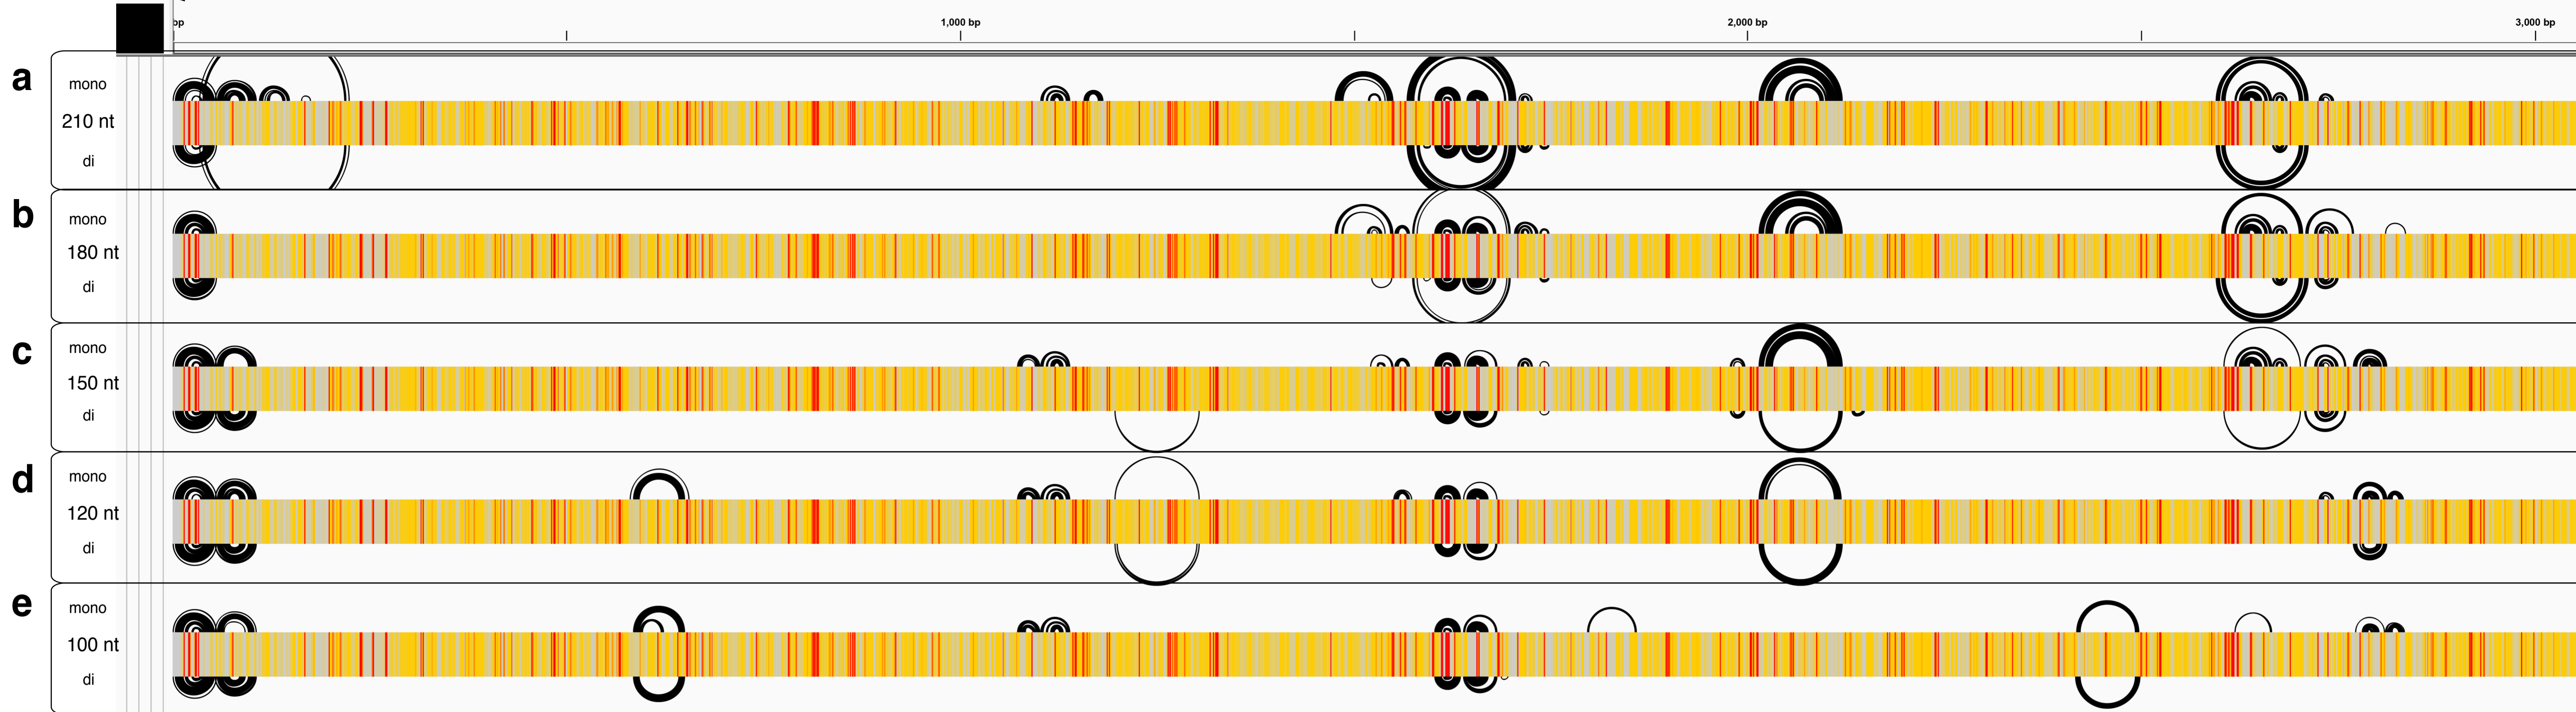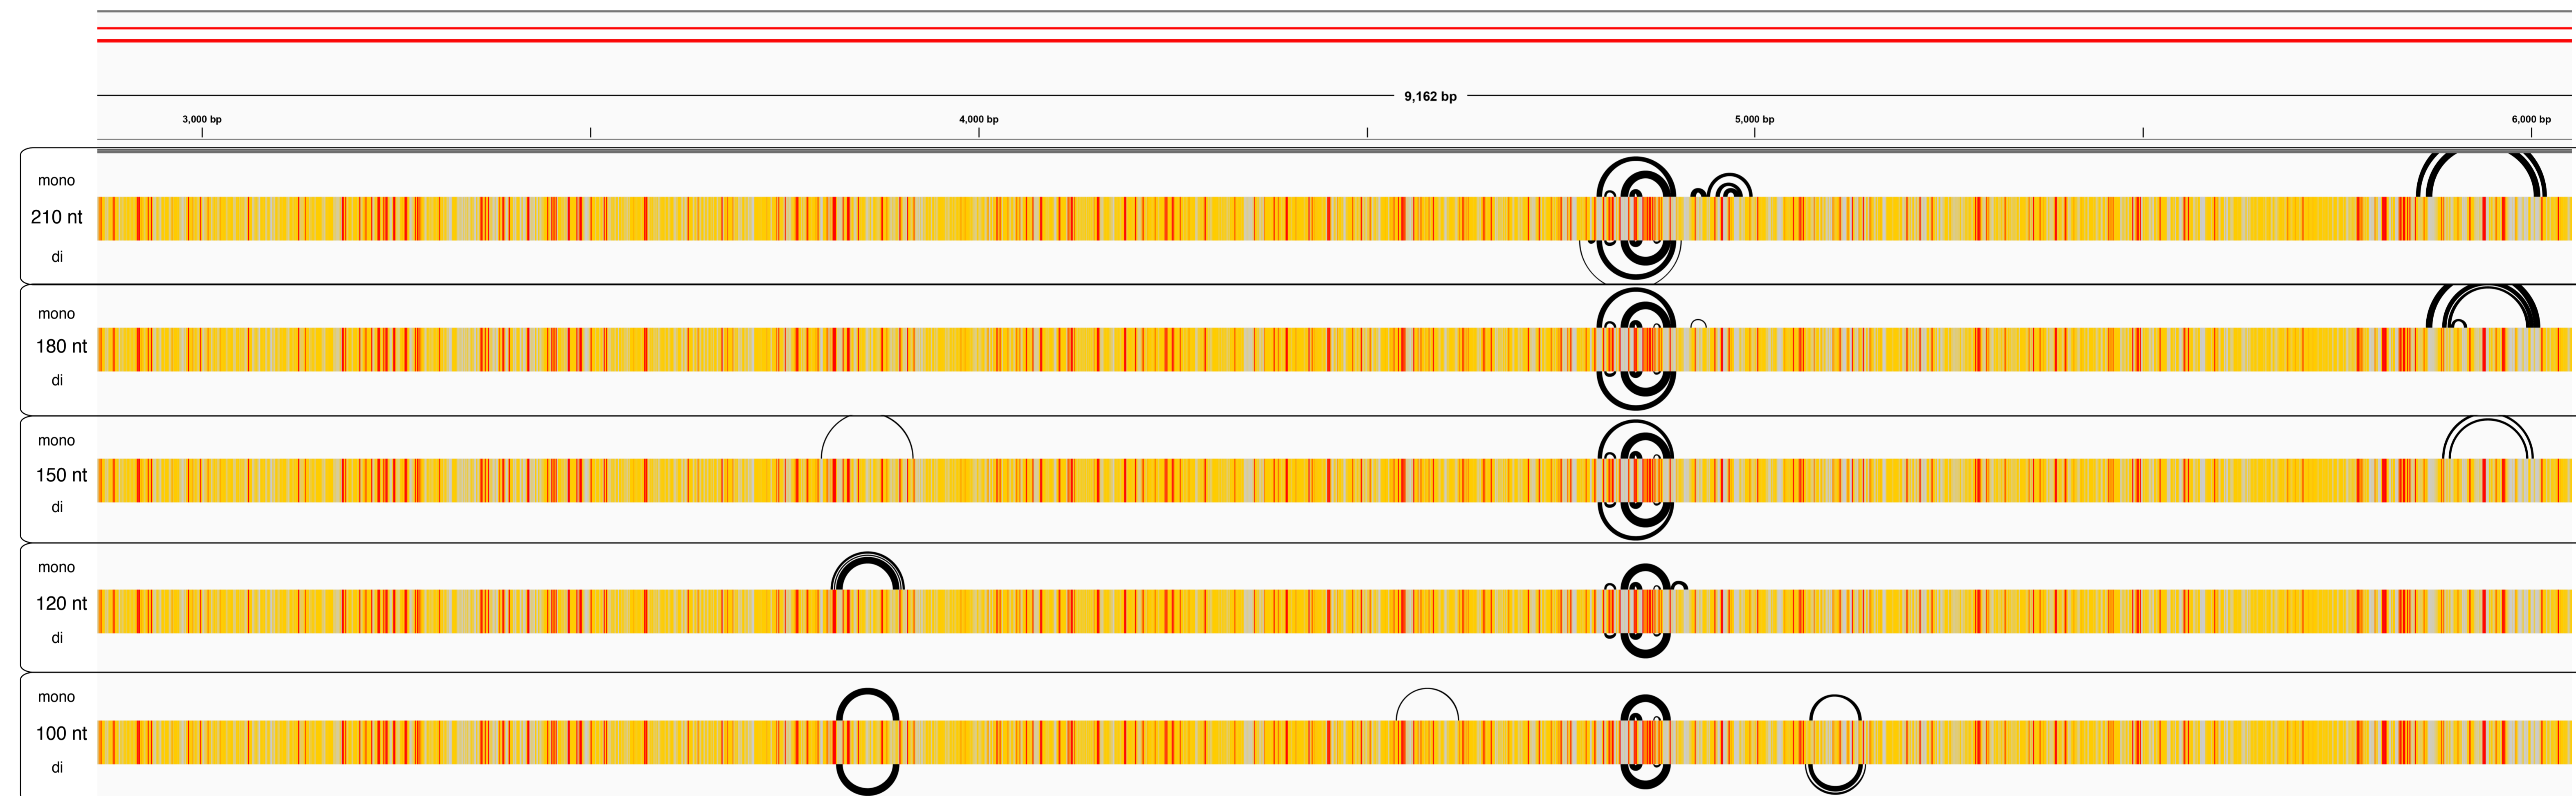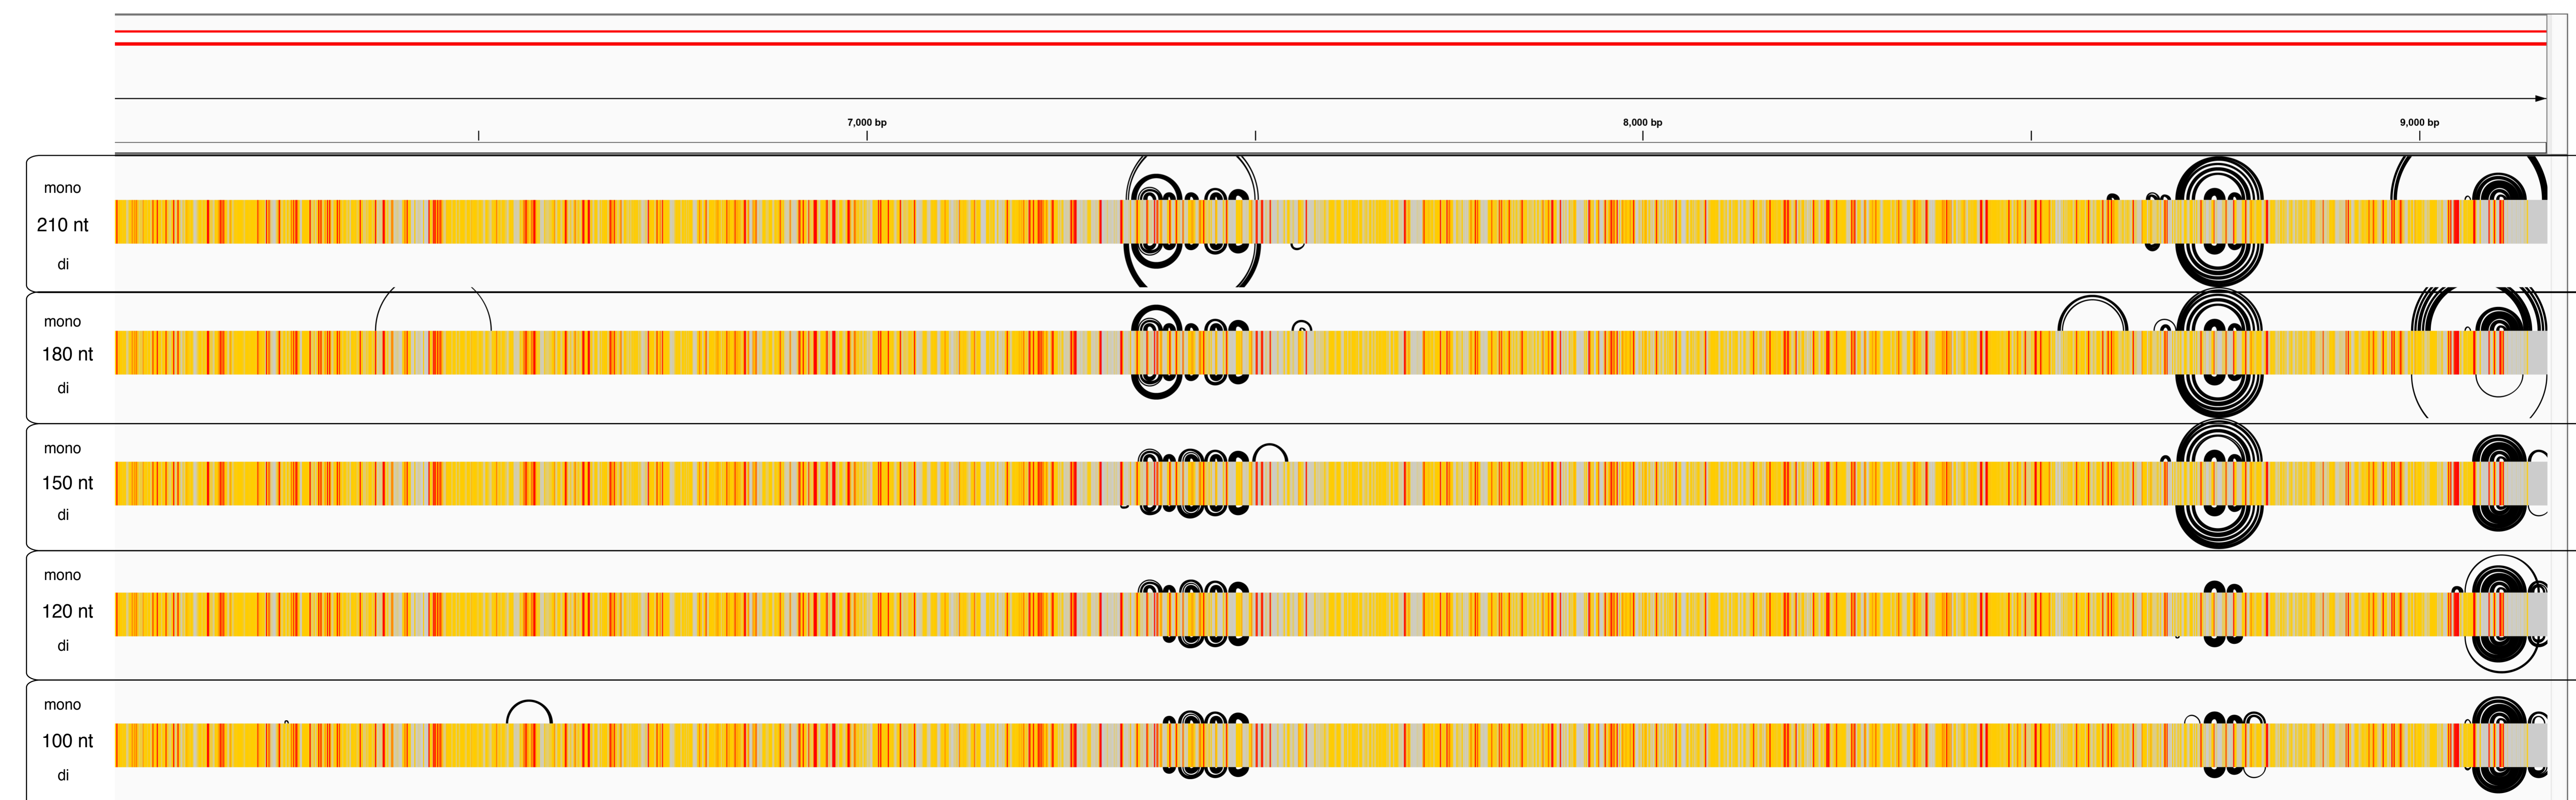

Supplement: Supplementa_Fig_S6_HIV_SHAPE_compareALL.pdf [file Supplementa_Fig_S6_HIV_SHAPE_compareALL.pdf]
