# Supplementary material for: ScanFold: an approach for genome-wide discovery of local RNA structural elements—applications to Zika virus and HIV
Source: PeerJ. 2018 Dec 18;6:e6136. doi: 10.7717/peerj.6136 (PMC6317755; doi:10.7717/peerj.6136)
Supplement: Supplemental Information 7 — Each row contains the data calculated for each window. Columns A and B are the starting (i) and ending (j) coordinates of the window fragment. Column C is the temperature used for all RNAFold calculations. Column D-H refer to the ΔGnative, thermodynamic z-score, stability ratio p-value, ensemble diversity, and f requency-of-MFE (fMFE) values respectively (detailed descriptions of all metrics can be found at the RNAStructuromeDB https://structurome.bb.iastate.edu or the corresponding manuscript (Andrews, Baber & Moss 2017)). Column I contains the sequence of the window; the ΔGnative and centroid structure of this sequence are shown in Column J and K. Column L-O report nucleotide counts for the window sequence. [file peerj-06-6136-s007.xlsx]

## Sheet: KJ776791_ZIKV_genome.win120.stp
i	j	Temperature	Native_dG	Z-score	P-value	ED	fMFE	Sequence	MFE_fold	Centroid	#A's	#G's	#C's	#U's	KJ776791.2
1	120	37	-33.4	-2.99	0	11.93	0.00386651	AGTTGTTGATCTGTGTGAATCAGACTGCGACAGTTCGAGTTTGAAGCGAAAGCTAGCAACAGTATCAACAGGTTTTATTTTGGATTTGGAAACGAGAGTTTCTGGTCATGAAAAACCCAA	...(((((((((((((...(((((((.(((....))))))))))(((....))).)).)))).)))))))((((((.((.(((..((((((((....))))))))))).))))))))...	...(((((((((((((...(((((((.(((....))))))))))(((....))).)).)))).)))))))((((((......(((..((((((....)))))).)))....))))))...	37	30	18	35
2	121	37	-33.4	-2.47	0	11.91	0.00386933	GTTGTTGATCTGTGTGAATCAGACTGCGACAGTTCGAGTTTGAAGCGAAAGCTAGCAACAGTATCAACAGGTTTTATTTTGGATTTGGAAACGAGAGTTTCTGGTCATGAAAAACCCAAA	..(((((((((((((...(((((((.(((....))))))))))(((....))).)).)))).)))))))((((((.((.(((..((((((((....))))))))))).))))))))....	..(((((((((((((...(((((((.(((....))))))))))(((....))).)).)))).)))))))((((((......(((..((((((....)))))).)))....))))))....	37	30	18	35
3	122	37	-33.4	-2.64	0	11.95	0.00386978	TTGTTGATCTGTGTGAATCAGACTGCGACAGTTCGAGTTTGAAGCGAAAGCTAGCAACAGTATCAACAGGTTTTATTTTGGATTTGGAAACGAGAGTTTCTGGTCATGAAAAACCCAAAA	.(((((((((((((...(((((((.(((....))))))))))(((....))).)).)))).)))))))((((((.((.(((..((((((((....))))))))))).)))))))).....	.(((((((((((((...(((((((.(((....))))))))))(((....))).)).)))).)))))))((((((......(((..((((((....)))))).)))....)))))).....	38	29	18	35
4	123	37	-33.2	-3.22	0	11.93	0.00371195	TGTTGATCTGTGTGAATCAGACTGCGACAGTTCGAGTTTGAAGCGAAAGCTAGCAACAGTATCAACAGGTTTTATTTTGGATTTGGAAACGAGAGTTTCTGGTCATGAAAAACCCAAAAA	(((((((((((((...(((((((.(((....))))))))))(((....))).)).)))).)))))))((((((.((.(((..((((((((....))))))))))).))))))))......	(((((((((((((...(((((((.(((....))))))))))(((....))).)).)))).)))))))((((((......(((..((((((....)))))).)))....))))))......	39	29	18	34
5	124	37	-32.5	-3.27	0	11.63	0.00456291	GTTGATCTGTGTGAATCAGACTGCGACAGTTCGAGTTTGAAGCGAAAGCTAGCAACAGTATCAACAGGTTTTATTTTGGATTTGGAAACGAGAGTTTCTGGTCATGAAAAACCCAAAAAA	((((((((((((...(((((((.(((....))))))))))(((....))).)).)))).)))))).((((((.((.(((..((((((((....))))))))))).)))))))).......	((((((((((((...(((((((.(((....))))))))))(((....))).)).)))).)))))).((((((......(((..((((((....)))))).)))....)))))).......	40	29	18	33
6	125	37	-28.6	-1.82	0.05	12.38	0.00281969	TTGATCTGTGTGAATCAGACTGCGACAGTTCGAGTTTGAAGCGAAAGCTAGCAACAGTATCAACAGGTTTTATTTTGGATTTGGAAACGAGAGTTTCTGGTCATGAAAAACCCAAAAAAG	(((((((((((...(((((((.(((....))))))))))(((....))).)).)))).)))))..((((((.((.(((..((((((((....))))))))))).))))))))........	(((((((((((...(((((((.(((....))))))))))(((....))).)).)))).)))))..((((((......(((..((((((....)))))).)))....))))))........	40	29	18	33
7	126	37	-28	-1.89	0.01	12.52	0.00359283	TGATCTGTGTGAATCAGACTGCGACAGTTCGAGTTTGAAGCGAAAGCTAGCAACAGTATCAACAGGTTTTATTTTGGATTTGGAAACGAGAGTTTCTGGTCATGAAAAACCCAAAAAAGA	((((((((((...(((((((.(((....))))))))))(((....))).)).)))).))))...((((((.((.(((..((((((((....))))))))))).)))))))).........	((((((((((...(((((((.(((....))))))))))(((....))).)).)))).))))...((((((......(((..((((((....)))))).)))....)))))).........	41	29	18	32
8	127	37	-27.3	-1.7	0.03	13.17	0.00431097	GATCTGTGTGAATCAGACTGCGACAGTTCGAGTTTGAAGCGAAAGCTAGCAACAGTATCAACAGGTTTTATTTTGGATTTGGAAACGAGAGTTTCTGGTCATGAAAAACCCAAAAAAGAA	(((((((((...(((((((.(((....))))))))))(((....))).)).)))).)))....((((((.((.(((..((((((((....))))))))))).))))))))..........	(((((((((...(((((((.(((....))))))))))(((....))).)).)))).)))....((((((......(((..((((((....)))))).)))....))))))..........	42	29	18	31
9	128	37	-24.5	-1.32	0.11	25.48	0.00270363	ATCTGTGTGAATCAGACTGCGACAGTTCGAGTTTGAAGCGAAAGCTAGCAACAGTATCAACAGGTTTTATTTTGGATTTGGAAACGAGAGTTTCTGGTCATGAAAAACCCAAAAAAGAAA	((((((.(((.(((((((.(((....))))))))))(((....)))..........)))))))))(((.((((((.(((((((((....)))))).........))).)))))).)))..	...........(((((((.(((....))))))))))(((....)))................(((((.......((...((((((....))))))..)).....)))))...........	43	28	18	31
10	129	37	-24.3	-0.99	0.15	24.02	0.00240403	TCTGTGTGAATCAGACTGCGACAGTTCGAGTTTGAAGCGAAAGCTAGCAACAGTATCAACAGGTTTTATTTTGGATTTGGAAACGAGAGTTTCTGGTCATGAAAAACCCAAAAAAGAAAT	(((((.(((.(((((((.(((....))))))))))(((....)))..........))))))))((((.((((((.(((((((((....)))))).........))).)))))).))))..	..........(((((((.(((....))))))))))(((....)))................(((((.......((...((((((....))))))..)).....)))))............	42	28	18	32
11	130	37	-24.1	-0.73	0.27	22.26	0.00253361	CTGTGTGAATCAGACTGCGACAGTTCGAGTTTGAAGCGAAAGCTAGCAACAGTATCAACAGGTTTTATTTTGGATTTGGAAACGAGAGTTTCTGGTCATGAAAAACCCAAAAAAGAAATC	((((((...(((((((.(((....))))))))))(((....))).)).))))........((((((.((.(((..((((((((....))))))))))).)))))))).............	(((......(((((((.(((....))))))))))(((....))).....)))........(((((.......((...((((((....))))))..)).....))))).............	42	28	19	31
12	131	37	-23.1	-0.49	0.27	22.33	0.00232761	TGTGTGAATCAGACTGCGACAGTTCGAGTTTGAAGCGAAAGCTAGCAACAGTATCAACAGGTTTTATTTTGGATTTGGAAACGAGAGTTTCTGGTCATGAAAAACCCAAAAAAGAAATCC	........(((((((.(((....))))))))))(((....)))................((((((.((((((.(((((((((....)))))).........))).))))))..)))))).	........(((((((.(((....))))))))))(((....)))................(((((.......((...((((((....))))))..)).....)))))..............	42	28	19	31
13	132	37	-23.1	-0.67	0.27	23.68	0.0030748	GTGTGAATCAGACTGCGACAGTTCGAGTTTGAAGCGAAAGCTAGCAACAGTATCAACAGGTTTTATTTTGGATTTGGAAACGAGAGTTTCTGGTCATGAAAAACCCAAAAAAGAAATCCG	.......(((((((.(((....))))))))))(((....)))................((((((.((((((.(((((((((....)))))).........))).))))))..))))))..	.......(((((((.(((....))))))))))(((....)))................(((((.......((...((((((....))))))..)).....)))))...............	42	29	19	30
14	133	37	-23.2	-0.57	0.21	24.93	0.00385946	TGTGAATCAGACTGCGACAGTTCGAGTTTGAAGCGAAAGCTAGCAACAGTATCAACAGGTTTTATTTTGGATTTGGAAACGAGAGTTTCTGGTCATGAAAAACCCAAAAAAGAAATCCGG	......(((((((.(((....))))))))))(((....)))..............(.((((((.((((((.(((((((((....)))))).........))).))))))..)))))).).	......(((((((.(((....))))))))))(((....)))................(((((............((((((....)))))).........)))))................	42	29	19	30
15	134	37	-23.8	-0.79	0.21	26.03	0.0111888	GTGAATCAGACTGCGACAGTTCGAGTTTGAAGCGAAAGCTAGCAACAGTATCAACAGGTTTTATTTTGGATTTGGAAACGAGAGTTTCTGGTCATGAAAAACCCAAAAAAGAAATCCGGA	.....(((((((.(((....))))))))))(((....)))........................(((((((((((((((....))))))(((........)))........)))))))))	.....(((((((.(((....))))))))))(((....))).................................((((((....))))))...............................	43	29	19	29
16	135	37	-24.6	-0.93	0.19	23.1	0.0264968	TGAATCAGACTGCGACAGTTCGAGTTTGAAGCGAAAGCTAGCAACAGTATCAACAGGTTTTATTTTGGATTTGGAAACGAGAGTTTCTGGTCATGAAAAACCCAAAAAAGAAATCCGGAG	....(((((((.(((....))))))))))(((....)))........................(((((((((((((((....))))))(((........)))........))))))))).	....(((((((.(((....))))))))))(((....)))........................(((((((((((((((....))))))(((........)))........))))))))).	43	29	19	29
17	136	37	-24.8	-0.94	0.19	23.33	0.0330608	GAATCAGACTGCGACAGTTCGAGTTTGAAGCGAAAGCTAGCAACAGTATCAACAGGTTTTATTTTGGATTTGGAAACGAGAGTTTCTGGTCATGAAAAACCCAAAAAAGAAATCCGGAGG	...(((((((.(((....))))))))))(((....))).......................((((((((((((((((....))))))(((........)))........)))))))))).	...(((((((.(((....))))))))))(((....)))........................(((((((((((((((....))))))(((........)))........)))))))))..	43	30	19	28
18	137	37	-24.8	-1.27	0.05	25.62	0.026938	AATCAGACTGCGACAGTTCGAGTTTGAAGCGAAAGCTAGCAACAGTATCAACAGGTTTTATTTTGGATTTGGAAACGAGAGTTTCTGGTCATGAAAAACCCAAAAAAGAAATCCGGAGGA	..(((((((.(((....))))))))))(((....))).......................((((((((((((((((....))))))(((........)))........))))))))))..	..(((((((.(((....))))))))))(((....))).................................((((((....))))))..................................	44	29	19	28
19	138	37	-24.8	-0.97	0.13	27.21	0.0111032	ATCAGACTGCGACAGTTCGAGTTTGAAGCGAAAGCTAGCAACAGTATCAACAGGTTTTATTTTGGATTTGGAAACGAGAGTTTCTGGTCATGAAAAACCCAAAAAAGAAATCCGGAGGAT	.(((((((.(((....))))))))))(((....))).......................((((((((((((((((....))))))(((........)))........))))))))))...	.(((((((.(((....))))))))))(((....))).................................((((((....))))))...................................	43	29	19	29
20	139	37	-25	-1.26	0.05	21.87	0.00553227	TCAGACTGCGACAGTTCGAGTTTGAAGCGAAAGCTAGCAACAGTATCAACAGGTTTTATTTTGGATTTGGAAACGAGAGTTTCTGGTCATGAAAAACCCAAAAAAGAAATCCGGAGGATT	(((((((.(((....))))))))))(((....)))................((((((.((.(((..((((((((....))))))))))).)))))))).........(((((...)))))	(((((((.(((....))))))))))(((....)))................(((((.......((...((((((....))))))..)).....)))))..........((((...)))).	42	29	19	30
21	140	37	-23.8	-0.58	0.23	19.69	0.00670019	CAGACTGCGACAGTTCGAGTTTGAAGCGAAAGCTAGCAACAGTATCAACAGGTTTTATTTTGGATTTGGAAACGAGAGTTTCTGGTCATGAAAAACCCAAAAAAGAAATCCGGAGGATTC	((((((.(((....))))))))).(((....)))................((((((.((.(((..((((((((....))))))))))).)))))))).........(((((...))))).	((((((.(((....))))))))).(((....)))................((((((......((...((((((....))))))..))....)))))).........(((((...))))).	42	29	20	29
22	141	37	-21.7	0.263	0.58	33.29	0.00503915	AGACTGCGACAGTTCGAGTTTGAAGCGAAAGCTAGCAACAGTATCAACAGGTTTTATTTTGGATTTGGAAACGAGAGTTTCTGGTCATGAAAAACCCAAAAAAGAAATCCGGAGGATTCC	(((((.(((....))))))))..(((....)))................((..((..(((((((((((((((....))))))(((........)))........))))))))).))..))	.((((.(((....)))))))...(((....)))................(((((.......((...((((((....))))))..)).....)))))..........((((...))))...	42	29	20	29
23	142	37	-21.7	0.354	0.58	38.86	0.00324256	GACTGCGACAGTTCGAGTTTGAAGCGAAAGCTAGCAACAGTATCAACAGGTTTTATTTTGGATTTGGAAACGAGAGTTTCTGGTCATGAAAAACCCAAAAAAGAAATCCGGAGGATTCCG	((((.(((....)))))))...(((....)))................((..((..(((((((((((((((....))))))(((........)))........))))))))).))..)).	......................(((....)))................(((((............((((((....)))))).........))))).........................	41	30	20	29
24	143	37	-22.8	-0.09	0.37	26.54	0.0012618	ACTGCGACAGTTCGAGTTTGAAGCGAAAGCTAGCAACAGTATCAACAGGTTTTATTTTGGATTTGGAAACGAGAGTTTCTGGTCATGAAAAACCCAAAAAAGAAATCCGGAGGATTCCGG	..(((.....((((.........)))).....)))............((((((.((.(((..((((((((....))))))))))).))))))))............(((((....)))))	...............................................((((((......(((..((((((....)))))).)))....))))))............(((((....)))))	41	30	20	29
25	144	37	-24.9	-0.98	0.13	24.88	0.00204636	CTGCGACAGTTCGAGTTTGAAGCGAAAGCTAGCAACAGTATCAACAGGTTTTATTTTGGATTTGGAAACGAGAGTTTCTGGTCATGAAAAACCCAAAAAAGAAATCCGGAGGATTCCGGA	.(((.....((((.........)))).....)))............((((((.((.(((..((((((((....))))))))))).))))))))...........((((((....))))))	..............................................((((((......(((..((((((....)))))).)))....))))))...........((((((....))))))	41	30	20	29
26	145	37	-25.9	-0.99	0.15	24.2	0.0022556	TGCGACAGTTCGAGTTTGAAGCGAAAGCTAGCAACAGTATCAACAGGTTTTATTTTGGATTTGGAAACGAGAGTTTCTGGTCATGAAAAACCCAAAAAAGAAATCCGGAGGATTCCGGAT	.......(((.((..(((..((........))..)))..))))).((((((.((.(((..((((((((....))))))))))).))))))))..........(((((((....)))))))	.............................................((((((......(((..((((((....)))))).)))....))))))..........(((((((....)))))))	41	30	19	30
27	146	37	-26.8	-1.16	0.15	23.46	0.00301156	GCGACAGTTCGAGTTTGAAGCGAAAGCTAGCAACAGTATCAACAGGTTTTATTTTGGATTTGGAAACGAGAGTTTCTGGTCATGAAAAACCCAAAAAAGAAATCCGGAGGATTCCGGATT	......(((.((..(((..((........))..)))..))))).((((((.((.(((..((((((((....))))))))))).)))))))).........((((((((....))))))))	............................................((((((......(((..((((((....)))))).)))....)))))).........((((((((....))))))))	41	30	19	30
28	147	37	-27.6	-1.55	0.07	22.17	0.00563292	CGACAGTTCGAGTTTGAAGCGAAAGCTAGCAACAGTATCAACAGGTTTTATTTTGGATTTGGAAACGAGAGTTTCTGGTCATGAAAAACCCAAAAAAGAAATCCGGAGGATTCCGGATTG	.....(((.((..(((..((........))..)))..))))).((((((.((.(((..((((((((....))))))))))).)))))))).........((((((((....)))))))).	...........................................((((((......(((..((((((....)))))).)))....)))))).........((((((((....)))))))).	41	30	19	30
29	148	37	-27.6	-1.45	0.05	22.49	0.00634551	GACAGTTCGAGTTTGAAGCGAAAGCTAGCAACAGTATCAACAGGTTTTATTTTGGATTTGGAAACGAGAGTTTCTGGTCATGAAAAACCCAAAAAAGAAATCCGGAGGATTCCGGATTGT	....(((.((..(((..((........))..)))..))))).((((((.((.(((..((((((((....))))))))))).)))))))).........((((((((....))))))))..	........((..........................))....((((((......(((..((((((....)))))).)))....)))))).........((((((((....))))))))..	41	30	18	31
30	149	37	-27.6	-1.26	0.05	21.33	0.00601795	ACAGTTCGAGTTTGAAGCGAAAGCTAGCAACAGTATCAACAGGTTTTATTTTGGATTTGGAAACGAGAGTTTCTGGTCATGAAAAACCCAAAAAAGAAATCCGGAGGATTCCGGATTGTC	...(((.((..(((..((........))..)))..))))).((((((.((.(((..((((((((....))))))))))).)))))))).........((((((((....))))))))...	...(((.((...((..((........))..))...))))).((((((......(((..((((((....)))))).)))....)))))).........((((((((....))))))))...	41	29	19	31
31	150	37	-28	-1.64	0.05	19.13	0.00595296	CAGTTCGAGTTTGAAGCGAAAGCTAGCAACAGTATCAACAGGTTTTATTTTGGATTTGGAAACGAGAGTTTCTGGTCATGAAAAACCCAAAAAAGAAATCCGGAGGATTCCGGATTGTCA	..(((.((..(((..((........))..)))..))))).((((((.((.(((..((((((((....))))))))))).)))))))).......((((((((((....)))))))).)).	..(((.((..(((..((........))..)))..))))).((((((......(((..((((((....)))))).)))....)))))).......((((((((((....)))))))).)).	41	29	19	31
32	151	37	-28	-1.85	0.03	19.05	0.00597013	AGTTCGAGTTTGAAGCGAAAGCTAGCAACAGTATCAACAGGTTTTATTTTGGATTTGGAAACGAGAGTTTCTGGTCATGAAAAACCCAAAAAAGAAATCCGGAGGATTCCGGATTGTCAA	.(((.((..(((..((........))..)))..))))).((((((.((.(((..((((((((....))))))))))).)))))))).......((((((((((....)))))))).))..	.(((.((..(((..((........))..)))..))))).((((((......(((..((((((....)))))).)))....)))))).......((((((((((....)))))))).))..	42	29	18	31
33	152	37	-28.2	-1.63	0.05	18.55	0.00640427	GTTCGAGTTTGAAGCGAAAGCTAGCAACAGTATCAACAGGTTTTATTTTGGATTTGGAAACGAGAGTTTCTGGTCATGAAAAACCCAAAAAAGAAATCCGGAGGATTCCGGATTGTCAAT	(((.((..(((..((........))..)))..))))).((((((.((.(((..((((((((....))))))))))).)))))))).......((((((((((....)))))))).))...	(((.((..(((..((........))..)))..))))).((((((......(((..((((((....)))))).)))....)))))).......((((((((((....)))))))).))...	41	29	18	32
34	153	37	-26.6	-1.77	0.05	19.91	0.0021094	TTCGAGTTTGAAGCGAAAGCTAGCAACAGTATCAACAGGTTTTATTTTGGATTTGGAAACGAGAGTTTCTGGTCATGAAAAACCCAAAAAAGAAATCCGGAGGATTCCGGATTGTCAATA	...((..(((..((........))..)))..))....((((((.((.(((..((((((((....))))))))))).)))))))).......((((((((((....)))))))).))....	...........(((....)))................((((((......(((..((((((....)))))).)))....)))))).........((((((((....)))))))).......	42	28	18	32
35	154	37	-26.6	-1.41	0.07	19.74	0.0022521	TCGAGTTTGAAGCGAAAGCTAGCAACAGTATCAACAGGTTTTATTTTGGATTTGGAAACGAGAGTTTCTGGTCATGAAAAACCCAAAAAAGAAATCCGGAGGATTCCGGATTGTCAATAT	..((..(((..((........))..)))..))....((((((.((.(((..((((((((....))))))))))).)))))))).......((((((((((....)))))))).)).....	..........(((....)))................((((((......(((..((((((....)))))).)))....)))))).........((((((((....))))))))........	42	28	18	32
36	155	37	-26.6	-1.66	0.01	19.62	0.00230857	CGAGTTTGAAGCGAAAGCTAGCAACAGTATCAACAGGTTTTATTTTGGATTTGGAAACGAGAGTTTCTGGTCATGAAAAACCCAAAAAAGAAATCCGGAGGATTCCGGATTGTCAATATG	.((..(((..((........))..)))..))....((((((.((.(((..((((((((....))))))))))).)))))))).......((((((((((....)))))))).))......	.........(((....)))................((((((......(((..((((((....)))))).)))....)))))).........((((((((....)))))))).........	42	29	18	31
37	156	37	-26.8	-1.7	0.07	19.88	0.00266094	GAGTTTGAAGCGAAAGCTAGCAACAGTATCAACAGGTTTTATTTTGGATTTGGAAACGAGAGTTTCTGGTCATGAAAAACCCAAAAAAGAAATCCGGAGGATTCCGGATTGTCAATATGC	((..(((..((........))..)))..))....((((((.((.(((..((((((((....))))))))))).)))))))).......((((((((((....)))))))).)).......	........(((....)))................((((((......(((..((((((....)))))).)))....)))))).........((((((((....))))))))..........	42	29	18	31
38	157	37	-26.6	-1.65	0.01	20.47	0.0011782	AGTTTGAAGCGAAAGCTAGCAACAGTATCAACAGGTTTTATTTTGGATTTGGAAACGAGAGTTTCTGGTCATGAAAAACCCAAAAAAGAAATCCGGAGGATTCCGGATTGTCAATATGCT	.......(((....)))((((............((((((.((.(((..((((((((....))))))))))).)))))))).......((((((((((....)))))))).))....))))	.......(((....)))................((((((......(((..((((((....)))))).)))....)))))).........((((((((....))))))))...........	42	28	18	32
39	158	37	-27.2	-1.68	0.05	19.92	0.00162241	GTTTGAAGCGAAAGCTAGCAACAGTATCAACAGGTTTTATTTTGGATTTGGAAACGAGAGTTTCTGGTCATGAAAAACCCAAAAAAGAAATCCGGAGGATTCCGGATTGTCAATATGCTA	......(((....)))((((............((((((.((.(((..((((((((....))))))))))).)))))))).......((((((((((....)))))))).))....)))).	......(((....)))................((((((......(((..((((((....)))))).)))....)))))).......(.((((((((....))))))))..).........	42	28	18	32
40	159	37	-27.2	-2.08	0.01	16.91	0.00201655	TTTGAAGCGAAAGCTAGCAACAGTATCAACAGGTTTTATTTTGGATTTGGAAACGAGAGTTTCTGGTCATGAAAAACCCAAAAAAGAAATCCGGAGGATTCCGGATTGTCAATATGCTAA	.....(((....)))((((............((((((.((.(((..((((((((....))))))))))).)))))))).......((((((((((....)))))))).))....))))..	.....(((....)))((((............((((((......(((..((((((....)))))).)))....)))))).........((((((((....)))))))).......))))..	43	27	18	32
41	160	37	-27.2	-1.71	0.05	16.57	0.00209091	TTGAAGCGAAAGCTAGCAACAGTATCAACAGGTTTTATTTTGGATTTGGAAACGAGAGTTTCTGGTCATGAAAAACCCAAAAAAGAAATCCGGAGGATTCCGGATTGTCAATATGCTAAA	....(((....)))((((............((((((.((.(((..((((((((....))))))))))).)))))))).......((((((((((....)))))))).))....))))...	....(((....)))((((............((((((......(((..((((((....)))))).)))....)))))).......(.((((((((....))))))))..)....))))...	44	27	18	31
42	161	37	-27.2	-2.15	0.01	15.87	0.00222887	TGAAGCGAAAGCTAGCAACAGTATCAACAGGTTTTATTTTGGATTTGGAAACGAGAGTTTCTGGTCATGAAAAACCCAAAAAAGAAATCCGGAGGATTCCGGATTGTCAATATGCTAAAA	...(((....)))((((............((((((.((.(((..((((((((....))))))))))).)))))))).......((((((((((....)))))))).))....))))....	...(((....)))((((............((((((......(((..((((((....)))))).)))....)))))).......(.((((((((....))))))))..)....))))....	45	27	18	30
43	162	37	-27.2	-2.28	0.03	15.65	0.00227357	GAAGCGAAAGCTAGCAACAGTATCAACAGGTTTTATTTTGGATTTGGAAACGAGAGTTTCTGGTCATGAAAAACCCAAAAAAGAAATCCGGAGGATTCCGGATTGTCAATATGCTAAAAC	..(((....)))((((............((((((.((.(((..((((((((....))))))))))).)))))))).......((((((((((....)))))))).))....)))).....	..(((....)))((((............((((((......(((..((((((....)))))).)))....)))))).......(.((((((((....))))))))..)....)))).....	45	27	19	29
44	163	37	-27.2	-2.23	0.01	15.64	0.00227645	AAGCGAAAGCTAGCAACAGTATCAACAGGTTTTATTTTGGATTTGGAAACGAGAGTTTCTGGTCATGAAAAACCCAAAAAAGAAATCCGGAGGATTCCGGATTGTCAATATGCTAAAACG	.(((....)))((((............((((((.((.(((..((((((((....))))))))))).)))))))).......((((((((((....)))))))).))....))))......	.(((....)))((((............((((((......(((..((((((....)))))).)))....)))))).......(.((((((((....))))))))..)....))))......	45	27	19	29
45	164	37	-27.3	-2.05	0.01	17.41	0.00191943	AGCGAAAGCTAGCAACAGTATCAACAGGTTTTATTTTGGATTTGGAAACGAGAGTTTCTGGTCATGAAAAACCCAAAAAAGAAATCCGGAGGATTCCGGATTGTCAATATGCTAAAACGC	.(((.....(((((............((((((.((.(((..((((((((....))))))))))).)))))))).......((((((((((....)))))))).))....)))))...)))	.((....))(((((............((((((......(((..((((((....)))))).)))....)))))).......(.((((((((....))))))))..)....)))))......	44	27	20	29
46	165	37	-28.8	-3.13	0	15.06	0.00421803	GCGAAAGCTAGCAACAGTATCAACAGGTTTTATTTTGGATTTGGAAACGAGAGTTTCTGGTCATGAAAAACCCAAAAAAGAAATCCGGAGGATTCCGGATTGTCAATATGCTAAAACGCG	(((.....(((((............((((((.((.(((..((((((((....))))))))))).)))))))).......((((((((((....)))))))).))....)))))...))).	(((.....(((((............((((((......(((..((((((....)))))).)))....)))))).......(.((((((((....))))))))..)....)))))...))).	43	28	20	29
47	166	37	-26.8	-1.61	0.05	15.3	0.00290519	CGAAAGCTAGCAACAGTATCAACAGGTTTTATTTTGGATTTGGAAACGAGAGTTTCTGGTCATGAAAAACCCAAAAAAGAAATCCGGAGGATTCCGGATTGTCAATATGCTAAAACGCGG	((.....(((((............((((((.((.(((..((((((((....))))))))))).)))))))).......((((((((((....)))))))).))....))))).....)).	((.....(((((............((((((......(((..((((((....)))))).)))....)))))).......(.((((((((....))))))))..)....))))).....)).	43	28	20	29
48	167	37	-26.2	-2.06	0	15.44	0.00260337	GAAAGCTAGCAACAGTATCAACAGGTTTTATTTTGGATTTGGAAACGAGAGTTTCTGGTCATGAAAAACCCAAAAAAGAAATCCGGAGGATTCCGGATTGTCAATATGCTAAAACGCGGA	....(((((((............((((((.((.(((..((((((((....))))))))))).)))))))).......((((((((((....)))))))).))....)))))....))...	......(((((............((((((......(((..((((((....)))))).)))....)))))).......(.((((((((....))))))))..)....))))).........	44	28	19	29
49	168	37	-26.2	-1.92	0.05	15.24	0.00277926	AAAGCTAGCAACAGTATCAACAGGTTTTATTTTGGATTTGGAAACGAGAGTTTCTGGTCATGAAAAACCCAAAAAAGAAATCCGGAGGATTCCGGATTGTCAATATGCTAAAACGCGGAG	...(((((((............((((((.((.(((..((((((((....))))))))))).)))))))).......((((((((((....)))))))).))....)))))....))....	...(((((((............((((((......(((..((((((....)))))).)))....)))))).......(.((((((((....))))))))..)....)))))....))....	44	28	19	29
50	169	37	-26.2	-1.42	0.05	16.41	0.00249521	AAGCTAGCAACAGTATCAACAGGTTTTATTTTGGATTTGGAAACGAGAGTTTCTGGTCATGAAAAACCCAAAAAAGAAATCCGGAGGATTCCGGATTGTCAATATGCTAAAACGCGGAGT	..(((((((............((((((.((.(((..((((((((....))))))))))).)))))))).......((((((((((....)))))))).))....)))))....)).....	....(((((............((((((......(((..((((((....)))))).)))....)))))).......(.((((((((....))))))))..)....)))))...........	43	28	19	30
51	170	37	-26.2	-1.89	0.03	17.82	0.00210546	AGCTAGCAACAGTATCAACAGGTTTTATTTTGGATTTGGAAACGAGAGTTTCTGGTCATGAAAAACCCAAAAAAGAAATCCGGAGGATTCCGGATTGTCAATATGCTAAAACGCGGAGTA	.(((((((............((((((.((.(((..((((((((....))))))))))).)))))))).......((((((((((....)))))))).))....)))))....))......	...(((((............((((((......(((..((((((....)))))).)))....)))))).......(.((((((((....))))))))..)....)))))............	43	28	19	30
52	171	37	-26.5	-1.65	0.03	16.58	0.00283189	GCTAGCAACAGTATCAACAGGTTTTATTTTGGATTTGGAAACGAGAGTTTCTGGTCATGAAAAACCCAAAAAAGAAATCCGGAGGATTCCGGATTGTCAATATGCTAAAACGCGGAGTAG	(((((((............((((((.((.(((..((((((((....))))))))))).)))))))).......((((((((((....)))))))).))....)))))....)).......	(((((((............((((((......(((..((((((....)))))).)))....)))))).......(.((((((((....))))))))..)....)))))....)).......	42	29	19	30
53	172	37	-26.6	-1.33	0.07	15.55	0.00305896	CTAGCAACAGTATCAACAGGTTTTATTTTGGATTTGGAAACGAGAGTTTCTGGTCATGAAAAACCCAAAAAAGAAATCCGGAGGATTCCGGATTGTCAATATGCTAAAACGCGGAGTAGC	.(((((............((((((.((.(((..((((((((....))))))))))).)))))))).......((((((((((....)))))))).))....)))))....((......))	.(((((............((((((......(((..((((((....)))))).)))....)))))).......(.((((((((....))))))))..)....)))))....((......))	42	28	20	30
54	173	37	-27.2	-1.37	0.11	15.3	0.00384821	TAGCAACAGTATCAACAGGTTTTATTTTGGATTTGGAAACGAGAGTTTCTGGTCATGAAAAACCCAAAAAAGAAATCCGGAGGATTCCGGATTGTCAATATGCTAAAACGCGGAGTAGCC	(((((............((((((.((.(((..((((((((....))))))))))).)))))))).......((((((((((....)))))))).))....)))))....((......)).	(((((............((((((......(((..((((((....)))))).)))....)))))).......(.((((((((....))))))))..)....)))))....((......)).	42	28	20	30
55	174	37	-25.8	-1.21	0.05	19.41	0.00210675	AGCAACAGTATCAACAGGTTTTATTTTGGATTTGGAAACGAGAGTTTCTGGTCATGAAAAACCCAAAAAAGAAATCCGGAGGATTCCGGATTGTCAATATGCTAAAACGCGGAGTAGCCC	((((............((((((.((.(((..((((((((....))))))))))).)))))))).......((((((((((....)))))))).))....)))).....((......))..	(((.............((((((......(((..((((((....)))))).)))....)))))).......(.((((((((....))))))))..).....))).................	42	28	21	29
56	175	37	-25.3	-0.8	0.15	20.59	0.000840797	GCAACAGTATCAACAGGTTTTATTTTGGATTTGGAAACGAGAGTTTCTGGTCATGAAAAACCCAAAAAAGAAATCCGGAGGATTCCGGATTGTCAATATGCTAAAACGCGGAGTAGCCCG	(((............((((((.((.(((..((((((((....))))))))))).)))))))).......((((((((((....)))))))).))....))).......(((......)))	...............((((((......(((..((((((....)))))).)))....)))))).......(.((((((((....))))))))..)..........................	41	29	21	29
57	176	37	-27.4	-1.05	0.09	16.22	0.00393497	CAACAGTATCAACAGGTTTTATTTTGGATTTGGAAACGAGAGTTTCTGGTCATGAAAAACCCAAAAAAGAAATCCGGAGGATTCCGGATTGTCAATATGCTAAAACGCGGAGTAGCCCGT	....(((((.....((((((.((.(((..((((((((....))))))))))).)))))))).......((((((((((....)))))))).))...))))).....((((......))))	....(((((.....((((((......(((..((((((....)))))).)))....)))))).......(.((((((((....))))))))..)...))))).....((((......))))	41	28	21	30
58	177	37	-29.5	-2.04	0.03	14.02	0.00491804	AACAGTATCAACAGGTTTTATTTTGGATTTGGAAACGAGAGTTTCTGGTCATGAAAAACCCAAAAAAGAAATCCGGAGGATTCCGGATTGTCAATATGCTAAAACGCGGAGTAGCCCGTG	...(((((.....((((((.((.(((..((((((((....))))))))))).)))))))).......((((((((((....)))))))).))...)))))....(((((......)))))	...(((((.....((((((......(((..((((((....)))))).)))....)))))).......(.((((((((....))))))))..)...)))))....(((((......)))))	41	29	20	30
59	178	37	-31	-2.95	0	13.83	0.00437185	ACAGTATCAACAGGTTTTATTTTGGATTTGGAAACGAGAGTTTCTGGTCATGAAAAACCCAAAAAAGAAATCCGGAGGATTCCGGATTGTCAATATGCTAAAACGCGGAGTAGCCCGTGT	..(((((.....((((((.((.(((..((((((((....))))))))))).)))))))).......((((((((((....)))))))).))...)))))...((((((......))))))	..(((((.....((((((......(((..((((((....)))))).)))....)))))).......(.((((((((....))))))))..)...)))))...((((((......))))))	40	29	20	31
60	179	37	-31.8	-2.54	0	13.44	0.0051516	CAGTATCAACAGGTTTTATTTTGGATTTGGAAACGAGAGTTTCTGGTCATGAAAAACCCAAAAAAGAAATCCGGAGGATTCCGGATTGTCAATATGCTAAAACGCGGAGTAGCCCGTGTG	.(((((.....((((((.((.(((..((((((((....))))))))))).)))))))).......((((((((((....)))))))).))...)))))...((((((......)))))).	.(((((.....((((((......(((..((((((....)))))).)))....)))))).......(.((((((((....))))))))..)...)))))...((((((......)))))).	39	30	20	31
61	180	37	-31.7	-2.13	0.01	13.62	0.00474618	AGTATCAACAGGTTTTATTTTGGATTTGGAAACGAGAGTTTCTGGTCATGAAAAACCCAAAAAAGAAATCCGGAGGATTCCGGATTGTCAATATGCTAAAACGCGGAGTAGCCCGTGTGA	(((((.....((((((.((.(((..((((((((....))))))))))).)))))))).......((((((((((....)))))))).))...)))))...((((((......))))))..	(((((.....((((((......(((..((((((....)))))).)))....)))))).......(.((((((((....))))))))..)...)))))...((((((......))))))..	40	30	19	31
62	181	37	-31.4	-1.92	0.03	13.41	0.00565076	GTATCAACAGGTTTTATTTTGGATTTGGAAACGAGAGTTTCTGGTCATGAAAAACCCAAAAAAGAAATCCGGAGGATTCCGGATTGTCAATATGCTAAAACGCGGAGTAGCCCGTGTGAG	.........((((((.((.(((..((((((((....))))))))))).)))))))).......((((((((((....)))))))).))...........((((((......))))))...	.........((((((......(((..((((((....)))))).)))....)))))).......(.((((((((....))))))))..)...........((((((......))))))...	39	31	19	31
63	182	37	-32.6	-3.22	0	11.1	0.00870045	TATCAACAGGTTTTATTTTGGATTTGGAAACGAGAGTTTCTGGTCATGAAAAACCCAAAAAAGAAATCCGGAGGATTCCGGATTGTCAATATGCTAAAACGCGGAGTAGCCCGTGTGAGC	........((((((.((.(((..((((((((....))))))))))).)))))))).......((((((((((....)))))))).)).....(((...((((((......)))))).)))	........((((((......(((..((((((....)))))).)))....)))))).......((((((((((....)))))))).)).....(((...((((((......)))))).)))	39	30	20	31
64	183	37	-33.4	-2.35	0	10.55	0.0102281	ATCAACAGGTTTTATTTTGGATTTGGAAACGAGAGTTTCTGGTCATGAAAAACCCAAAAAAGAAATCCGGAGGATTCCGGATTGTCAATATGCTAAAACGCGGAGTAGCCCGTGTGAGCC	.......((((((.((.(((..((((((((....))))))))))).)))))))).......((((((((((....)))))))).)).....(((...((((((......)))))).))).	.......((((((......(((..((((((....)))))).)))....)))))).......((((((((((....)))))))).)).....(((...((((((......)))))).))).	39	30	21	30
65	184	37	-33.4	-2.16	0	10.97	0.0100934	TCAACAGGTTTTATTTTGGATTTGGAAACGAGAGTTTCTGGTCATGAAAAACCCAAAAAAGAAATCCGGAGGATTCCGGATTGTCAATATGCTAAAACGCGGAGTAGCCCGTGTGAGCCC	......((((((.((.(((..((((((((....))))))))))).)))))))).......((((((((((....)))))))).)).....(((...((((((......)))))).)))..	......((((((......(((..((((((....)))))).)))....)))))).......((((((((((....)))))))).)).....(((...((((((......)))))).)))..	38	30	22	30
66	185	37	-33.4	-2.46	0	10.98	0.0101883	CAACAGGTTTTATTTTGGATTTGGAAACGAGAGTTTCTGGTCATGAAAAACCCAAAAAAGAAATCCGGAGGATTCCGGATTGTCAATATGCTAAAACGCGGAGTAGCCCGTGTGAGCCCC	.....((((((.((.(((..((((((((....))))))))))).)))))))).......((((((((((....)))))))).)).....(((...((((((......)))))).)))...	.....((((((......(((..((((((....)))))).)))....)))))).......((((((((((....)))))))).)).....(((...((((((......)))))).)))...	38	30	23	29
67	186	37	-33.4	-2.35	0	11.33	0.00999557	AACAGGTTTTATTTTGGATTTGGAAACGAGAGTTTCTGGTCATGAAAAACCCAAAAAAGAAATCCGGAGGATTCCGGATTGTCAATATGCTAAAACGCGGAGTAGCCCGTGTGAGCCCCT	....((((((.((.(((..((((((((....))))))))))).)))))))).......((((((((((....)))))))).)).....(((...((((((......)))))).)))....	....((((((......(((..((((((....)))))).)))....)))))).......((((((((((....)))))))).)).....(((...((((((......)))))).)))....	38	30	22	30
68	187	37	-33.4	-2.55	0.01	11.57	0.00970483	ACAGGTTTTATTTTGGATTTGGAAACGAGAGTTTCTGGTCATGAAAAACCCAAAAAAGAAATCCGGAGGATTCCGGATTGTCAATATGCTAAAACGCGGAGTAGCCCGTGTGAGCCCCTT	...((((((.((.(((..((((((((....))))))))))).)))))))).......((((((((((....)))))))).)).....(((...((((((......)))))).))).....	...((((((......(((..((((((....)))))).)))....)))))).......((((((((((....)))))))).)).....(((...((((((......)))))).))).....	37	30	22	31
69	188	37	-33.4	-2.17	0.01	11.84	0.00917069	CAGGTTTTATTTTGGATTTGGAAACGAGAGTTTCTGGTCATGAAAAACCCAAAAAAGAAATCCGGAGGATTCCGGATTGTCAATATGCTAAAACGCGGAGTAGCCCGTGTGAGCCCCTTT	..((((((.((.(((..((((((((....))))))))))).)))))))).......((((((((((....)))))))).)).....(((...((((((......)))))).)))......	..((((((......(((..((((((....)))))).)))....)))))).......((((((((((....)))))))).)).....(((...((((((......)))))).)))......	36	30	22	32
70	189	37	-33.4	-1.71	0.03	12.66	0.00712902	AGGTTTTATTTTGGATTTGGAAACGAGAGTTTCTGGTCATGAAAAACCCAAAAAAGAAATCCGGAGGATTCCGGATTGTCAATATGCTAAAACGCGGAGTAGCCCGTGTGAGCCCCTTTG	.((((((.((.(((..((((((((....))))))))))).)))))))).......((((((((((....)))))))).)).....(((...((((((......)))))).))).......	.((((((......(((..((((((....)))))).)))....)))))).......(.((((((((....))))))))..).....(((...((((((......)))))).))).......	36	31	21	32
71	190	37	-33.7	-1.79	0.05	13.72	0.00516139	GGTTTTATTTTGGATTTGGAAACGAGAGTTTCTGGTCATGAAAAACCCAAAAAAGAAATCCGGAGGATTCCGGATTGTCAATATGCTAAAACGCGGAGTAGCCCGTGTGAGCCCCTTTGG	((((((.((.(((..((((((((....))))))))))).)))))))).........((((((((....))))))))..(((...(((...((((((......)))))).)))....))).	((((((......(((..((((((....)))))).)))....)))))).........((((((((....))))))))..(((...(((...((((((......)))))).)))....))).	35	32	21	32
72	191	37	-34	-2.56	0	13.26	0.00520262	GTTTTATTTTGGATTTGGAAACGAGAGTTTCTGGTCATGAAAAACCCAAAAAAGAAATCCGGAGGATTCCGGATTGTCAATATGCTAAAACGCGGAGTAGCCCGTGTGAGCCCCTTTGGG	......(((..((((.((((((....))))))))))..)))...((((((...((((((((((....)))))))).)).....(((...((((((......)))))).)))...))))))	...........(((..((((((....)))))).)))........((((((...((((((((((....)))))))).)).....(((...((((((......)))))).)))...))))))	35	32	21	32
73	192	37	-35.1	-2.62	0	13.67	0.00548653	TTTTATTTTGGATTTGGAAACGAGAGTTTCTGGTCATGAAAAACCCAAAAAAGAAATCCGGAGGATTCCGGATTGTCAATATGCTAAAACGCGGAGTAGCCCGTGTGAGCCCCTTTGGGG	.....(((..((((.((((((....))))))))))..)))...((((((...((((((((((....)))))))).)).....(((...((((((......)))))).)))...)))))).	..........(((..((((((....)))))).)))........((((((...((((((((((....)))))))).)).....(((...((((((......)))))).)))...)))))).	35	32	21	32
74	193	37	-35.1	-2.2	0.01	19.87	0.00438659	TTTATTTTGGATTTGGAAACGAGAGTTTCTGGTCATGAAAAACCCAAAAAAGAAATCCGGAGGATTCCGGATTGTCAATATGCTAAAACGCGGAGTAGCCCGTGTGAGCCCCTTTGGGGG	....(((..((((.((((((....))))))))))..)))...((((((...((((((((((....)))))))).)).....(((...((((((......)))))).)))...))))))..	.........(((..((((((....)))))).)))........(((((....((((((((((....)))))))).)).....(((...((((((......)))))).)))....)))))..	35	33	21	31
75	194	37	-38.4	-2.75	0.01	15.91	0.0385846	TTATTTTGGATTTGGAAACGAGAGTTTCTGGTCATGAAAAACCCAAAAAAGAAATCCGGAGGATTCCGGATTGTCAATATGCTAAAACGCGGAGTAGCCCGTGTGAGCCCCTTTGGGGGC	...((((((.(((((((((....)))))).........))).))))))..((((((((((....)))))))).))...........((((((......))))))..(((((....)))))	....(((((....((((((....)))))).............)))))...((((((((((....)))))))).))...........((((((......))))))..(((((....)))))	35	33	22	30
76	195	37	-40.2	-3.2	0	15.13	0.036948	TATTTTGGATTTGGAAACGAGAGTTTCTGGTCATGAAAAACCCAAAAAAGAAATCCGGAGGATTCCGGATTGTCAATATGCTAAAACGCGGAGTAGCCCGTGTGAGCCCCTTTGGGGGCT	..((((((.(((((((((....)))))).........))).))))))..((((((((((....)))))))).))...........((((((......)))))).((((((....))))))	...(((((....((((((....)))))).............)))))...((((((((((....)))))))).))...........((((((......)))))).((((((....))))))	35	33	22	30
77	196	37	-41.3	-3.49	0	15.1	0.0356567	ATTTTGGATTTGGAAACGAGAGTTTCTGGTCATGAAAAACCCAAAAAAGAAATCCGGAGGATTCCGGATTGTCAATATGCTAAAACGCGGAGTAGCCCGTGTGAGCCCCTTTGGGGGCTT	.((((((.(((((((((....)))))).........))).))))))..((((((((((....)))))))).))...........((((((......))))))(((((((....)))))))	..(((((....((((((....)))))).............)))))...((((((((((....)))))))).))...........((((((......))))))(((((((....)))))))	35	33	22	30
78	197	37	-41.9	-3.23	0	14.93	0.0412541	TTTTGGATTTGGAAACGAGAGTTTCTGGTCATGAAAAACCCAAAAAAGAAATCCGGAGGATTCCGGATTGTCAATATGCTAAAACGCGGAGTAGCCCGTGTGAGCCCCTTTGGGGGCTTG	((((((.(((((((((....)))))).........))).))))))..((((((((((....)))))))).))...........((((((......))))))(((((((....))))))).	.(((((....((((((....)))))).............)))))...((((((((((....)))))))).))...........((((((......))))))(((((((....))))))).	34	34	22	30
79	198	37	-41	-3.04	0	14.13	0.0277823	TTTGGATTTGGAAACGAGAGTTTCTGGTCATGAAAAACCCAAAAAAGAAATCCGGAGGATTCCGGATTGTCAATATGCTAAAACGCGGAGTAGCCCGTGTGAGCCCCTTTGGGGGCTTGA	(((((.(((((((((....)))))).........))).)))))...((((((((((....)))))))).))...........((((((......))))))(((((((....)))))))..	.........((((((....)))))).....................((((((((((....)))))))).))...........((((((......))))))(((((((....)))))))..	35	34	22	29
80	199	37	-40.3	-3.23	0	11.39	0.0219901	TTGGATTTGGAAACGAGAGTTTCTGGTCATGAAAAACCCAAAAAAGAAATCCGGAGGATTCCGGATTGTCAATATGCTAAAACGCGGAGTAGCCCGTGTGAGCCCCTTTGGGGGCTTGAA	...((((.((((((....)))))))))).................((((((((((....)))))))).))...........((((((......))))))(((((((....)))))))...	........((((((....)))))).....................((((((((((....)))))))).))...........((((((......))))))(((((((....)))))))...	36	34	22	28
81	200	37	-40.3	-2.82	0	8.84	0.0339542	TGGATTTGGAAACGAGAGTTTCTGGTCATGAAAAACCCAAAAAAGAAATCCGGAGGATTCCGGATTGTCAATATGCTAAAACGCGGAGTAGCCCGTGTGAGCCCCTTTGGGGGCTTGAAG	..((((.((((((....)))))))))).................((((((((((....)))))))).))...........((((((......))))))(((((((....)))))))....	..((...((((((....))))))..)).................((((((((((....)))))))).))...........((((((......))))))(((((((....)))))))....	36	35	22	27
82	201	37	-40.3	-3.52	0	7.95	0.0378583	GGATTTGGAAACGAGAGTTTCTGGTCATGAAAAACCCAAAAAAGAAATCCGGAGGATTCCGGATTGTCAATATGCTAAAACGCGGAGTAGCCCGTGTGAGCCCCTTTGGGGGCTTGAAGA	.((((.((((((....)))))))))).................((((((((((....)))))))).))...........((((((......))))))(((((((....))))))).....	.(((..((((((....)))))).))).................((((((((((....)))))))).))...........((((((......))))))(((((((....))))))).....	37	35	22	26
83	202	37	-40.6	-3.27	0	7.08	0.0441263	GATTTGGAAACGAGAGTTTCTGGTCATGAAAAACCCAAAAAAGAAATCCGGAGGATTCCGGATTGTCAATATGCTAAAACGCGGAGTAGCCCGTGTGAGCCCCTTTGGGGGCTTGAAGAG	((((.((((((....)))))))))).................((((((((((....)))))))).))...........((((((......))))))(((((((....)))))))......	(((..((((((....)))))).))).................((((((((((....)))))))).))...........((((((......))))))(((((((....)))))))......	37	35	22	26
84	203	37	-40	-3.48	0	8.3	0.0699747	ATTTGGAAACGAGAGTTTCTGGTCATGAAAAACCCAAAAAAGAAATCCGGAGGATTCCGGATTGTCAATATGCTAAAACGCGGAGTAGCCCGTGTGAGCCCCTTTGGGGGCTTGAAGAGG	....((((((....))))))(((........))).......((((((((((....)))))))).))...........((((((......))))))(((((((....))))))).......	....((((((....))))))(((........))).......((((((((((....)))))))).))...........((((((......))))))(((((((....))))))).......	37	35	22	26
85	204	37	-40	-2.84	0	11.76	0.0413455	TTTGGAAACGAGAGTTTCTGGTCATGAAAAACCCAAAAAAGAAATCCGGAGGATTCCGGATTGTCAATATGCTAAAACGCGGAGTAGCCCGTGTGAGCCCCTTTGGGGGCTTGAAGAGGC	...((((((....))))))(((........))).......((((((((((....)))))))).))...........((((((......))))))(((((((....)))))))........	...((((((....))))))(((........))).......((((((((((....)))))))).))...........((((((......))))))(((((((....)))))))........	36	35	23	26
86	205	37	-40.6	-3.4	0	16.2	0.0319335	TTGGAAACGAGAGTTTCTGGTCATGAAAAACCCAAAAAAGAAATCCGGAGGATTCCGGATTGTCAATATGCTAAAACGCGGAGTAGCCCGTGTGAGCCCCTTTGGGGGCTTGAAGAGGCT	..((((((....))))))(((........))).......((((((((((....)))))))).)).....(((...((((((......))))))(((((((....))))))).....))).	..((((((....)))))).....................((((((((((....)))))))).))...........((((((......))))))(((((((....))))))).........	36	35	23	26
87	206	37	-41.2	-3.15	0	17.64	0.0502451	TGGAAACGAGAGTTTCTGGTCATGAAAAACCCAAAAAAGAAATCCGGAGGATTCCGGATTGTCAATATGCTAAAACGCGGAGTAGCCCGTGTGAGCCCCTTTGGGGGCTTGAAGAGGCTG	.((((((....))))))((((.................((((((((((....)))))))).))...........((((((......))))))(((((((....))))))).....)))).	.((((((....)))))).....................((((((((((....)))))))).))...........((((((......))))))(((((((....)))))))..........	36	36	23	25
88	207	37	-42.6	-3.19	0	8.85	0.0420504	GGAAACGAGAGTTTCTGGTCATGAAAAACCCAAAAAAGAAATCCGGAGGATTCCGGATTGTCAATATGCTAAAACGCGGAGTAGCCCGTGTGAGCCCCTTTGGGGGCTTGAAGAGGCTGC	((((((....))))))(((........))).......((((((((((....)))))))).)).....((......))...((((((..(..(((((((....)))))))..)..))))))	((((((....))))))(((........))).......((((((((((....)))))))).)).....((......))...((((((..(..(((((((....)))))))..)..))))))	36	36	24	24
89	208	37	-42.3	-2.86	0	10.06	0.0331803	GAAACGAGAGTTTCTGGTCATGAAAAACCCAAAAAAGAAATCCGGAGGATTCCGGATTGTCAATATGCTAAAACGCGGAGTAGCCCGTGTGAGCCCCTTTGGGGGCTTGAAGAGGCTGCC	(((((....))))).(((........))).......((((((((((....)))))))).)).....((......))...((((((..(..(((((((....)))))))..)..)))))).	(((((....))))).(((........))).......((((((((((....)))))))).)).....((......))...((((((..(..(((((((....)))))))..)..)))))).	36	35	25	24
90	209	37	-41.7	-3.9	0	15.21	0.0970573	AAACGAGAGTTTCTGGTCATGAAAAACCCAAAAAAGAAATCCGGAGGATTCCGGATTGTCAATATGCTAAAACGCGGAGTAGCCCGTGTGAGCCCCTTTGGGGGCTTGAAGAGGCTGCCA	....(..((((((((((........))).......((((((((((....)))))))).))...........((((((......))))))(((((((....)))))))..)))))))..).	....(..((((((((((........))).......(.((((((((....))))))))..)...........((((((......))))))(((((((....)))))))..)))))))..).	37	34	25	24
91	210	37	-41.7	-2.69	0.01	14.64	0.0947558	AACGAGAGTTTCTGGTCATGAAAAACCCAAAAAAGAAATCCGGAGGATTCCGGATTGTCAATATGCTAAAACGCGGAGTAGCCCGTGTGAGCCCCTTTGGGGGCTTGAAGAGGCTGCCAG	...(..((((((((((........))).......((((((((((....)))))))).))...........((((((......))))))(((((((....)))))))..)))))))..)..	......((((((((((........))).......(.((((((((....))))))))..)...........((((((......))))))(((((((....)))))))..))))))).....	36	35	25	24
92	211	37	-41.7	-2.78	0	17.28	0.080676	ACGAGAGTTTCTGGTCATGAAAAACCCAAAAAAGAAATCCGGAGGATTCCGGATTGTCAATATGCTAAAACGCGGAGTAGCCCGTGTGAGCCCCTTTGGGGGCTTGAAGAGGCTGCCAGC	..(..((((((((((........))).......((((((((((....)))))))).))...........((((((......))))))(((((((....)))))))..)))))))..)...	.....((((((((((........))).......(.((((((((....))))))))..)...........((((((......))))))(((((((....)))))))..)))))))......	35	35	26	24
93	212	37	-41.7	-3	0	21.27	0.0681447	CGAGAGTTTCTGGTCATGAAAAACCCAAAAAAGAAATCCGGAGGATTCCGGATTGTCAATATGCTAAAACGCGGAGTAGCCCGTGTGAGCCCCTTTGGGGGCTTGAAGAGGCTGCCAGCC	.(..((((((((((........))).......((((((((((....)))))))).))...........((((((......))))))(((((((....)))))))..)))))))..)....	....((((((((((........))).......(.((((((((....))))))))..)...........((((((......))))))(((((((....)))))))..))))))).......	34	35	27	24
94	213	37	-41.9	-2.72	0	23.44	0.0607102	GAGAGTTTCTGGTCATGAAAAACCCAAAAAAGAAATCCGGAGGATTCCGGATTGTCAATATGCTAAAACGCGGAGTAGCCCGTGTGAGCCCCTTTGGGGGCTTGAAGAGGCTGCCAGCCG	(..((((((((((........))).......((((((((((....)))))))).))...........((((((......))))))(((((((....)))))))..)))))))..).....	..........(((........))).........((((((((....)))))))).....................((((((.....(((((((....))))))).....))))))......	34	36	26	24
95	214	37	-41.6	-2.52	0.01	20.07	0.017378	AGAGTTTCTGGTCATGAAAAACCCAAAAAAGAAATCCGGAGGATTCCGGATTGTCAATATGCTAAAACGCGGAGTAGCCCGTGTGAGCCCCTTTGGGGGCTTGAAGAGGCTGCCAGCCGG	...((((.(((.((((................((((((((....)))))))).....))))))))))).(((.((((((..(..(((((((....)))))))..)..))))))...))).	................................((((((((....))))))))..................((.((((((..(..(((((((....)))))))..)..))))))...))..	34	36	26	24
96	215	37	-42.9	-2.82	0	9.84	0.0146704	GAGTTTCTGGTCATGAAAAACCCAAAAAAGAAATCCGGAGGATTCCGGATTGTCAATATGCTAAAACGCGGAGTAGCCCGTGTGAGCCCCTTTGGGGGCTTGAAGAGGCTGCCAGCCGGA	.....((((((..................((((((((((....)))))))).)).....((......))...((((((..(..(((((((....)))))))..)..))))))..))))))	.....((((((..................((((((((((....)))))))).)).....((......))...((((((..(..(((((((....)))))))..)..))))))..))))))	34	36	26	24
97	216	37	-43.4	-2.75	0.01	8.06	0.0181001	AGTTTCTGGTCATGAAAAACCCAAAAAAGAAATCCGGAGGATTCCGGATTGTCAATATGCTAAAACGCGGAGTAGCCCGTGTGAGCCCCTTTGGGGGCTTGAAGAGGCTGCCAGCCGGAC	....((((((..................((((((((((....)))))))).)).....((......))...((((((..(..(((((((....)))))))..)..))))))..)))))).	....((((((..................((((((((((....)))))))).)).....((......))...((((((..(..(((((((....)))))))..)..))))))..)))))).	34	35	27	24
98	217	37	-43.4	-2.92	0	8.85	0.0170663	GTTTCTGGTCATGAAAAACCCAAAAAAGAAATCCGGAGGATTCCGGATTGTCAATATGCTAAAACGCGGAGTAGCCCGTGTGAGCCCCTTTGGGGGCTTGAAGAGGCTGCCAGCCGGACT	...((((((..................((((((((((....)))))))).)).....((......))...((((((..(..(((((((....)))))))..)..))))))..))))))..	...((((((..................((((((((((....)))))))).)).....((......))...((((((..(..(((((((....)))))))..)..))))))..))))))..	33	35	27	25
99	218	37	-43.4	-3.1	0	7.78	0.0182464	TTTCTGGTCATGAAAAACCCAAAAAAGAAATCCGGAGGATTCCGGATTGTCAATATGCTAAAACGCGGAGTAGCCCGTGTGAGCCCCTTTGGGGGCTTGAAGAGGCTGCCAGCCGGACTT	..((((((..................((((((((((....)))))))).)).....((......))...((((((..(..(((((((....)))))))..)..))))))..))))))...	..((((((..................((((((((((....)))))))).)).....((......))...((((((..(..(((((((....)))))))..)..))))))..))))))...	33	34	27	26
100	219	37	-43.4	-2.89	0	7.6	0.0184028	TTCTGGTCATGAAAAACCCAAAAAAGAAATCCGGAGGATTCCGGATTGTCAATATGCTAAAACGCGGAGTAGCCCGTGTGAGCCCCTTTGGGGGCTTGAAGAGGCTGCCAGCCGGACTTC	.((((((..................((((((((((....)))))))).)).....((......))...((((((..(..(((((((....)))))))..)..))))))..))))))....	.((((((..................((((((((((....)))))))).)).....((......))...((((((..(..(((((((....)))))))..)..))))))..))))))....	33	34	28	25
101	220	37	-43.2	-2.9	0	8.58	0.0170967	TCTGGTCATGAAAAACCCAAAAAAGAAATCCGGAGGATTCCGGATTGTCAATATGCTAAAACGCGGAGTAGCCCGTGTGAGCCCCTTTGGGGGCTTGAAGAGGCTGCCAGCCGGACTTCT	((((((..................((((((((((....)))))))).)).....((......))...((((((..(..(((((((....)))))))..)..))))))..)))))).....	((((((..................((((((((((....)))))))).)).....((......))...((((((..(..(((((((....)))))))..)..))))))..)))))).....	33	34	28	25
102	221	37	-41.9	-2.37	0.01	18.2	0.0131461	CTGGTCATGAAAAACCCAAAAAAGAAATCCGGAGGATTCCGGATTGTCAATATGCTAAAACGCGGAGTAGCCCGTGTGAGCCCCTTTGGGGGCTTGAAGAGGCTGCCAGCCGGACTTCTG	(((((..................((((((((((....)))))))).)).....((......))...((((((..(..(((((((....)))))))..)..))))))..))))).......	(((((..................((((((((((....)))))))).)).....((......))...((((((..(..(((((((....)))))))..)..))))))..))))).......	33	35	28	24
103	222	37	-41.7	-2.9	0	22.22	0.0163581	TGGTCATGAAAAACCCAAAAAAGAAATCCGGAGGATTCCGGATTGTCAATATGCTAAAACGCGGAGTAGCCCGTGTGAGCCCCTTTGGGGGCTTGAAGAGGCTGCCAGCCGGACTTCTGC	.(((........))).......((((((((((....)))))))).))...........((((((......))))))(((((((....)))))))((((.((((...))))...))))...	......................(.((((((((....))))))))..)...............((.((((((.....(((((((....))))))).....))))))...))..........	33	35	28	24
104	223	37	-42.8	-3.24	0	15.3	0.0429604	GGTCATGAAAAACCCAAAAAAGAAATCCGGAGGATTCCGGATTGTCAATATGCTAAAACGCGGAGTAGCCCGTGTGAGCCCCTTTGGGGGCTTGAAGAGGCTGCCAGCCGGACTTCTGCT	(((........))).......((((((((((....)))))))).)).....((.......(((.((((((..(..(((((((....)))))))..)..))))))...))).......)).	(((........))).......((((((((((....)))))))).)).....((.......(((.((((((..(..(((((((....)))))))..)..))))))...))).......)).	33	35	28	24
105	224	37	-41.8	-2.47	0	16.86	0.0325789	GTCATGAAAAACCCAAAAAAGAAATCCGGAGGATTCCGGATTGTCAATATGCTAAAACGCGGAGTAGCCCGTGTGAGCCCCTTTGGGGGCTTGAAGAGGCTGCCAGCCGGACTTCTGCTG	....................((((((((((....)))))))).)).....((.......(((.((((((..(..(((((((....)))))))..)..))))))...))).......))..	....................((((((((((....)))))))).))...............((.((((((..(..(((((((....)))))))..)..))))))...))............	33	35	28	24
106	225	37	-42.1	-2.75	0.01	21.36	0.012928	TCATGAAAAACCCAAAAAAGAAATCCGGAGGATTCCGGATTGTCAATATGCTAAAACGCGGAGTAGCCCGTGTGAGCCCCTTTGGGGGCTTGAAGAGGCTGCCAGCCGGACTTCTGCTGG	...........(((.....((((((((((....)))))))).))...........((((((......))))))(((((((....)))))))((((.((((...))))...))))...)))	...................((((((((((....)))))))).)).....((......))...((((((..(..(((((((....)))))))..)..))))))(((...........))).	33	35	28	24
107	226	37	-45.6	-3.4	0	25.21	0.0590221	CATGAAAAACCCAAAAAAGAAATCCGGAGGATTCCGGATTGTCAATATGCTAAAACGCGGAGTAGCCCGTGTGAGCCCCTTTGGGGGCTTGAAGAGGCTGCCAGCCGGACTTCTGCTGGG	.........((((.....((((((((((....)))))))).))...........((((((......))))))(((((((....)))))))((((.((((...))))...))))...))))	.........((((.......((((((((....)))))))).....................((((((.....(((((((....))))))).....))))))...............))))	33	36	28	23
108	227	37	-47.1	-3.17	0	25.01	0.0506247	ATGAAAAACCCAAAAAAGAAATCCGGAGGATTCCGGATTGTCAATATGCTAAAACGCGGAGTAGCCCGTGTGAGCCCCTTTGGGGGCTTGAAGAGGCTGCCAGCCGGACTTCTGCTGGGT	.......(((((.....((((((((((....)))))))).))...........((((((......))))))(((((((....)))))))((((.((((...))))...))))...)))))	.......(((((.......((((((((....)))))))).....................((((((.....(((((((....))))))).....))))))...............)))))	33	36	27	24
109	228	37	-47.5	-3.4	0	24.88	0.0556302	TGAAAAACCCAAAAAAGAAATCCGGAGGATTCCGGATTGTCAATATGCTAAAACGCGGAGTAGCCCGTGTGAGCCCCTTTGGGGGCTTGAAGAGGCTGCCAGCCGGACTTCTGCTGGGTC	......(((((.....((((((((((....)))))))).))...........((((((......))))))(((((((....)))))))((((.((((...))))...))))...))))).	......(((((.......((((((((....)))))))).....................((((((.....(((((((....))))))).....))))))...............))))).	32	36	28	24
110	229	37	-47.5	-3.08	0	25.01	0.0540946	GAAAAACCCAAAAAAGAAATCCGGAGGATTCCGGATTGTCAATATGCTAAAACGCGGAGTAGCCCGTGTGAGCCCCTTTGGGGGCTTGAAGAGGCTGCCAGCCGGACTTCTGCTGGGTCA	.....(((((.....((((((((((....)))))))).))...........((((((......))))))(((((((....)))))))((((.((((...))))...))))...)))))..	.....(((((.......((((((((....)))))))).....................((((((.....(((((((....))))))).....))))))...............)))))..	33	36	28	23
111	230	37	-47.5	-4.08	0	24.91	0.0550477	AAAAACCCAAAAAAGAAATCCGGAGGATTCCGGATTGTCAATATGCTAAAACGCGGAGTAGCCCGTGTGAGCCCCTTTGGGGGCTTGAAGAGGCTGCCAGCCGGACTTCTGCTGGGTCAT	....(((((.....((((((((((....)))))))).))...........((((((......))))))(((((((....)))))))((((.((((...))))...))))...)))))...	....(((((.......((((((((....)))))))).....................((((((.....(((((((....))))))).....))))))...............)))))...	33	35	28	24
112	231	37	-47.5	-2.81	0	24.94	0.0541856	AAAACCCAAAAAAGAAATCCGGAGGATTCCGGATTGTCAATATGCTAAAACGCGGAGTAGCCCGTGTGAGCCCCTTTGGGGGCTTGAAGAGGCTGCCAGCCGGACTTCTGCTGGGTCATG	...(((((.....((((((((((....)))))))).))...........((((((......))))))(((((((....)))))))((((.((((...))))...))))...)))))....	...(((((.......((((((((....)))))))).....................((((((.....(((((((....))))))).....))))))...............)))))....	32	36	28	24
113	232	37	-47.5	-3.47	0	25.13	0.0548057	AAACCCAAAAAAGAAATCCGGAGGATTCCGGATTGTCAATATGCTAAAACGCGGAGTAGCCCGTGTGAGCCCCTTTGGGGGCTTGAAGAGGCTGCCAGCCGGACTTCTGCTGGGTCATGG	..(((((.....((((((((((....)))))))).))...........((((((......))))))(((((((....)))))))((((.((((...))))...))))...))))).....	..(((((.......((((((((....)))))))).....................((((((.....(((((((....))))))).....))))))...............))))).....	31	37	28	24
114	233	37	-47.5	-2.99	0	27.2	0.0139767	AACCCAAAAAAGAAATCCGGAGGATTCCGGATTGTCAATATGCTAAAACGCGGAGTAGCCCGTGTGAGCCCCTTTGGGGGCTTGAAGAGGCTGCCAGCCGGACTTCTGCTGGGTCATGGG	.(((((.....((((((((((....)))))))).))...........((((((......))))))(((((((....)))))))((((.((((...))))...))))...)))))......	..((((.....((((((((((....)))))))).))..................((((((.....(((((((....))))))).....))))))......................))))	30	38	28	24
115	234	37	-48	-3.34	0	23.14	0.0152414	ACCCAAAAAAGAAATCCGGAGGATTCCGGATTGTCAATATGCTAAAACGCGGAGTAGCCCGTGTGAGCCCCTTTGGGGGCTTGAAGAGGCTGCCAGCCGGACTTCTGCTGGGTCATGGGC	.((((.....((((((((((....)))))))).))...........((((((......))))))(((((((....))))))).....(((..(((((.((....)))))))))).)))).	.((((.....((((((((((....)))))))).))......(......).....(((((.....(((((((....))))))).....))))).(((...........))).....)))).	29	38	29	24
116	235	37	-47.3	-2.75	0	22.51	0.0151982	CCCAAAAAAGAAATCCGGAGGATTCCGGATTGTCAATATGCTAAAACGCGGAGTAGCCCGTGTGAGCCCCTTTGGGGGCTTGAAGAGGCTGCCAGCCGGACTTCTGCTGGGTCATGGGCC	((((.....((((((((((....)))))))).))...........((((((......))))))(((((((....))))))).....(((..(((((.((....)))))))))).))))..	((((.....((((((((((....)))))))).)).....((......))....(((((.....(((((((....))))))).....))))).(((...........))).....))))..	28	38	30	24
117	236	37	-47	-1.94	0.05	19.77	0.0420806	CCAAAAAAGAAATCCGGAGGATTCCGGATTGTCAATATGCTAAAACGCGGAGTAGCCCGTGTGAGCCCCTTTGGGGGCTTGAAGAGGCTGCCAGCCGGACTTCTGCTGGGTCATGGGCCC	........((((((((((....)))))))).)).....((.......(((.((((((..(..(((((((....)))))))..)..))))))...))).......)).(((((...)))))	........((((((((((....)))))))).)).....((.......(((.((((((..(..(((((((....)))))))..)..))))))...))).......)).(((((...)))))	28	38	30	24
118	237	37	-48.7	-3.03	0	13.25	0.0349277	CAAAAAAGAAATCCGGAGGATTCCGGATTGTCAATATGCTAAAACGCGGAGTAGCCCGTGTGAGCCCCTTTGGGGGCTTGAAGAGGCTGCCAGCCGGACTTCTGCTGGGTCATGGGCCCA	.......((((((((((....)))))))).)).....((.......(((.((((((..(..(((((((....)))))))..)..))))))...))).......))((((((...))))))	.......((((((((((....)))))))).)).....((.......(((.((((((..(..(((((((....)))))))..)..))))))...))).......))((((((...))))))	29	38	29	24
119	238	37	-49.4	-3.31	0	12.6	0.0501945	AAAAAAGAAATCCGGAGGATTCCGGATTGTCAATATGCTAAAACGCGGAGTAGCCCGTGTGAGCCCCTTTGGGGGCTTGAAGAGGCTGCCAGCCGGACTTCTGCTGGGTCATGGGCCCAT	......((((((((((....)))))))).)).....((.......(((.((((((..(..(((((((....)))))))..)..))))))...))).......))((((((...)))))).	......((((((((((....)))))))).)).....((.......(((.((((((..(..(((((((....)))))))..)..))))))...))).......))((((((...)))))).	29	38	28	25
120	239	37	-49.4	-3.33	0	13.04	0.0493015	AAAAAGAAATCCGGAGGATTCCGGATTGTCAATATGCTAAAACGCGGAGTAGCCCGTGTGAGCCCCTTTGGGGGCTTGAAGAGGCTGCCAGCCGGACTTCTGCTGGGTCATGGGCCCATC	.....((((((((((....)))))))).)).....((.......(((.((((((..(..(((((((....)))))))..)..))))))...))).......))((((((...))))))..	.....((((((((((....)))))))).)).....((.......(((.((((((..(..(((((((....)))))))..)..))))))...))).......))((((((...))))))..	28	38	29	25
121	240	37	-49.4	-2.52	0	16.75	0.0393175	AAAAGAAATCCGGAGGATTCCGGATTGTCAATATGCTAAAACGCGGAGTAGCCCGTGTGAGCCCCTTTGGGGGCTTGAAGAGGCTGCCAGCCGGACTTCTGCTGGGTCATGGGCCCATCA	....((((((((((....)))))))).)).....((.......(((.((((((..(..(((((((....)))))))..)..))))))...))).......))((((((...))))))...	....((((((((((....)))))))).)).....((.......(((.((((((.....(((((((....))))))).....))))))...))).......))((((((...))))))...	28	38	29	25
122	241	37	-50.3	-2.59	0	13.71	0.045953	AAAGAAATCCGGAGGATTCCGGATTGTCAATATGCTAAAACGCGGAGTAGCCCGTGTGAGCCCCTTTGGGGGCTTGAAGAGGCTGCCAGCCGGACTTCTGCTGGGTCATGGGCCCATCAG	...((((((((((....)))))))).))..............(((.((((((..(..(((((((....)))))))..)..))))))...))).....(((.((((((...)))))).)))	...(.((((((((....))))))))..)..............(((.((((((..(..(((((((....)))))))..)..))))))...))).....(((.((((((...)))))).)))	27	39	29	25
123	242	37	-51.7	-2.79	0	9.75	0.0427278	AAGAAATCCGGAGGATTCCGGATTGTCAATATGCTAAAACGCGGAGTAGCCCGTGTGAGCCCCTTTGGGGGCTTGAAGAGGCTGCCAGCCGGACTTCTGCTGGGTCATGGGCCCATCAGG	..((((((((((....)))))))).))..............(((.((((((..(..(((((((....)))))))..)..))))))...))).....(((.((((((...)))))).))).	..(.((((((((....))))))))..)..............(((.((((((..(..(((((((....)))))))..)..))))))...))).....(((.((((((...)))))).))).	26	40	29	25
124	243	37	-52.6	-3.06	0.01	9.48	0.0417429	AGAAATCCGGAGGATTCCGGATTGTCAATATGCTAAAACGCGGAGTAGCCCGTGTGAGCCCCTTTGGGGGCTTGAAGAGGCTGCCAGCCGGACTTCTGCTGGGTCATGGGCCCATCAGGA	.((((((((((....)))))))).))..............(((.((((((..(..(((((((....)))))))..)..))))))...)))...(((((.((((((...)))))).)))))	.(.((((((((....))))))))..)..............(((.((((((..(..(((((((....)))))))..)..))))))...)))...(((((.((((((...)))))).)))))	26	40	29	25
125	244	37	-53.5	-3.31	0	8.73	0.0684925	GAAATCCGGAGGATTCCGGATTGTCAATATGCTAAAACGCGGAGTAGCCCGTGTGAGCCCCTTTGGGGGCTTGAAGAGGCTGCCAGCCGGACTTCTGCTGGGTCATGGGCCCATCAGGAT	((((((((((....)))))))).))..............(((.((((((..(..(((((((....)))))))..)..))))))...)))...(((((.((((((...)))))).))))).	((((((((((....)))))))).))..............(((.((((((..(..(((((((....)))))))..)..))))))...)))...(((((.((((((...)))))).))))).	25	40	29	26
126	245	37	-52.9	-3.46	0	10.35	0.0624141	AAATCCGGAGGATTCCGGATTGTCAATATGCTAAAACGCGGAGTAGCCCGTGTGAGCCCCTTTGGGGGCTTGAAGAGGCTGCCAGCCGGACTTCTGCTGGGTCATGGGCCCATCAGGATG	.((((((((....)))))))).................(((.((((((..(..(((((((....)))))))..)..))))))...)))...(((((.((((((...)))))).)))))..	.((((((((....)))))))).................(((.((((((..(..(((((((....)))))))..)..))))))...)))...(((((.((((((...)))))).)))))..	25	40	29	26
127	246	37	-52.5	-3.29	0	10.53	0.04346	AATCCGGAGGATTCCGGATTGTCAATATGCTAAAACGCGGAGTAGCCCGTGTGAGCCCCTTTGGGGGCTTGAAGAGGCTGCCAGCCGGACTTCTGCTGGGTCATGGGCCCATCAGGATGG	((((((((....)))))))).................(((.((((((..(..(((((((....)))))))..)..))))))...)))...(((((.((((((...)))))).)))))...	((((((((....)))))))).................(((.((((((..(..(((((((....)))))))..)..))))))...)))...(((((.((((((...)))))).)))))...	24	41	29	26
128	247	37	-51	-2.68	0	13.32	0.0199524	ATCCGGAGGATTCCGGATTGTCAATATGCTAAAACGCGGAGTAGCCCGTGTGAGCCCCTTTGGGGGCTTGAAGAGGCTGCCAGCCGGACTTCTGCTGGGTCATGGGCCCATCAGGATGGT	(((((((....)))))))..................(((.((((((..(..(((((((....)))))))..)..))))))...)))...(((((.((((((...)))))).)))))....	(((((((....)))))))......................((((((..(..(((((((....)))))))..)..)))))).........(((((.((((((...)))))).)))))....	23	41	29	27
129	248	37	-51.7	-2.14	0	11.4	0.0446795	TCCGGAGGATTCCGGATTGTCAATATGCTAAAACGCGGAGTAGCCCGTGTGAGCCCCTTTGGGGGCTTGAAGAGGCTGCCAGCCGGACTTCTGCTGGGTCATGGGCCCATCAGGATGGTC	((((((....))))))...................(((.((((((..(..(((((((....)))))))..)..))))))...)))((((((((.((((((...)))))).))))..))))	((((((....))))))...................(((.((((((..(..(((((((....)))))))..)..))))))...)))(((.((((.((((((...)))))).))))...)))	22	41	30	27
130	249	37	-51.3	-2.77	0	10.27	0.0366803	CCGGAGGATTCCGGATTGTCAATATGCTAAAACGCGGAGTAGCCCGTGTGAGCCCCTTTGGGGGCTTGAAGAGGCTGCCAGCCGGACTTCTGCTGGGTCATGGGCCCATCAGGATGGTCT	(((((....)))))....................(((.((((((..(..(((((((....)))))))..)..))))))...)))((((((((.((((((...)))))).))))..)))).	(((((....))))).....................((.((((((..(..(((((((....)))))))..)..))))))...)).((((((((.((((((...)))))).))))..)))).	22	41	30	27
131	250	37	-48.2	-2.19	0	18.58	0.017343	CGGAGGATTCCGGATTGTCAATATGCTAAAACGCGGAGTAGCCCGTGTGAGCCCCTTTGGGGGCTTGAAGAGGCTGCCAGCCGGACTTCTGCTGGGTCATGGGCCCATCAGGATGGTCTT	((((....)))).....................(((.((((((..(..(((((((....)))))))..)..))))))...)))((((((((.((((((...)))))).))))..))))..	((((....)))).........................((((((..(..(((((((....)))))))..)..))))))......(((.((((.((((((...)))))).))))...)))..	22	41	29	28
132	251	37	-47.1	-1.79	0	27.15	0.0101594	GGAGGATTCCGGATTGTCAATATGCTAAAACGCGGAGTAGCCCGTGTGAGCCCCTTTGGGGGCTTGAAGAGGCTGCCAGCCGGACTTCTGCTGGGTCATGGGCCCATCAGGATGGTCTTG	(((....)))((((((((..............(((.((((((..(..(((((((....)))))))..)..))))))...))).....(((.((((((...)))))).)))))))))))..	........((((...........((......))...((((((..(..(((((((....)))))))..)..))))))...))))...((((.((((((...)))))).)))).........	22	42	28	28
133	252	37	-46.9	-1.64	0.03	25.9	0.00707688	GAGGATTCCGGATTGTCAATATGCTAAAACGCGGAGTAGCCCGTGTGAGCCCCTTTGGGGGCTTGAAGAGGCTGCCAGCCGGACTTCTGCTGGGTCATGGGCCCATCAGGATGGTCTTGG	.((((((((((.(((.......((......))...((((((..(..(((((((....)))))))..)..)))))))))))))).(((((.((((((...)))))).)))))..)))))..	......................((......))...((((((..(..(((((((....)))))))..)..))))))..........((((.((((((...)))))).))))..........	22	42	28	28
134	253	37	-49.7	-2.68	0	10.8	0.0185867	AGGATTCCGGATTGTCAATATGCTAAAACGCGGAGTAGCCCGTGTGAGCCCCTTTGGGGGCTTGAAGAGGCTGCCAGCCGGACTTCTGCTGGGTCATGGGCCCATCAGGATGGTCTTGGC	.....((((..((.............))..))))((((((..(..(((((((....)))))))..)..))))))..((((((((((((.((((((...)))))).))))..)))).))))	.....((((.....................))))((((((..(..(((((((....)))))))..)..))))))..(((.((((((((.((((((...)))))).))))..))))..)))	22	41	29	28
135	254	37	-50.9	-2.47	0	10.98	0.0181714	GGATTCCGGATTGTCAATATGCTAAAACGCGGAGTAGCCCGTGTGAGCCCCTTTGGGGGCTTGAAGAGGCTGCCAGCCGGACTTCTGCTGGGTCATGGGCCCATCAGGATGGTCTTGGCG	....((((..((.............))..))))((((((..(..(((((((....)))))))..)..))))))..((((((((((((.((((((...)))))).))))..)))).)))).	....((((.....................))))((((((..(..(((((((....)))))))..)..))))))..(((.((((((((.((((((...)))))).))))..))))..))).	21	42	29	28
136	255	37	-50.9	-2.03	0.01	11.16	0.0167626	GATTCCGGATTGTCAATATGCTAAAACGCGGAGTAGCCCGTGTGAGCCCCTTTGGGGGCTTGAAGAGGCTGCCAGCCGGACTTCTGCTGGGTCATGGGCCCATCAGGATGGTCTTGGCGA	...((((..((.............))..))))((((((..(..(((((((....)))))))..)..))))))..((((((((((((.((((((...)))))).))))..)))).))))..	...((((.....................))))((((((..(..(((((((....)))))))..)..))))))..(((.((((((((.((((((...)))))).))))..))))..)))..	22	41	29	28
137	256	37	-50.9	-2.72	0	10.59	0.0177514	ATTCCGGATTGTCAATATGCTAAAACGCGGAGTAGCCCGTGTGAGCCCCTTTGGGGGCTTGAAGAGGCTGCCAGCCGGACTTCTGCTGGGTCATGGGCCCATCAGGATGGTCTTGGCGAT	..((((..((.............))..))))((((((..(..(((((((....)))))))..)..))))))..((((((((((((.((((((...)))))).))))..)))).))))...	..((((.....................))))((((((..(..(((((((....)))))))..)..))))))..(((.((((((((.((((((...)))))).))))..))))..)))...	22	40	29	29
138	257	37	-50.9	-3.06	0	13.66	0.0164867	TTCCGGATTGTCAATATGCTAAAACGCGGAGTAGCCCGTGTGAGCCCCTTTGGGGGCTTGAAGAGGCTGCCAGCCGGACTTCTGCTGGGTCATGGGCCCATCAGGATGGTCTTGGCGATT	.((((..((.............))..))))((((((..(..(((((((....)))))))..)..))))))..((((((((((((.((((((...)))))).))))..)))).))))....	.((((.....................))))((((((..(..(((((((....)))))))..)..))))))..(((.((((((((.((((((...)))))).))))..))))..)))....	21	40	29	30
139	258	37	-51.7	-2.93	0	19.95	0.0197653	TCCGGATTGTCAATATGCTAAAACGCGGAGTAGCCCGTGTGAGCCCCTTTGGGGGCTTGAAGAGGCTGCCAGCCGGACTTCTGCTGGGTCATGGGCCCATCAGGATGGTCTTGGCGATTC	...(((((((((..........((((((......))))))(((((((....))))))).....((((...))))(((((((((.((((((...)))))).))))..))))))))))))))	...(((((((((.................((((((..(..(((((((....)))))))..)..))))))......((((((((.((((((...)))))).))))..)))).)))))))))	21	40	30	29
140	259	37	-52.8	-2.92	0	15.43	0.0264711	CCGGATTGTCAATATGCTAAAACGCGGAGTAGCCCGTGTGAGCCCCTTTGGGGGCTTGAAGAGGCTGCCAGCCGGACTTCTGCTGGGTCATGGGCCCATCAGGATGGTCTTGGCGATTCT	..(((((((((..........((((((......))))))(((((((....))))))).....((((...))))(((((((((.((((((...)))))).))))..)))))))))))))).	..(((((((((..............((.((((((.....(((((((....))))))).....))))))...)).((((((((.((((((...)))))).))))..)))).))))))))).	21	40	30	29
141	260	37	-52.8	-2.83	0	15.43	0.0263619	CGGATTGTCAATATGCTAAAACGCGGAGTAGCCCGTGTGAGCCCCTTTGGGGGCTTGAAGAGGCTGCCAGCCGGACTTCTGCTGGGTCATGGGCCCATCAGGATGGTCTTGGCGATTCTA	.(((((((((..........((((((......))))))(((((((....))))))).....((((...))))(((((((((.((((((...)))))).))))..))))))))))))))..	.(((((((((..............((.((((((.....(((((((....))))))).....))))))...)).((((((((.((((((...)))))).))))..)))).)))))))))..	22	40	29	29
142	261	37	-52.6	-3.02	0	15.48	0.0261415	GGATTGTCAATATGCTAAAACGCGGAGTAGCCCGTGTGAGCCCCTTTGGGGGCTTGAAGAGGCTGCCAGCCGGACTTCTGCTGGGTCATGGGCCCATCAGGATGGTCTTGGCGATTCTAG	(((((((((..........((((((......))))))(((((((....))))))).....((((...))))(((((((((.((((((...)))))).))))..))))))))))))))...	(((((((((..............((.((((((.....(((((((....))))))).....))))))...)).((((((((.((((((...)))))).))))..)))).)))))))))...	22	41	28	29
143	262	37	-49.5	-2.12	0.01	20.39	0.0124663	GATTGTCAATATGCTAAAACGCGGAGTAGCCCGTGTGAGCCCCTTTGGGGGCTTGAAGAGGCTGCCAGCCGGACTTCTGCTGGGTCATGGGCCCATCAGGATGGTCTTGGCGATTCTAGC	((((((((..........((((((......))))))(((((((....))))))).....((((...))))(((((((((.((((((...)))))).))))..))))))))))))).....	.(((((((.................((((((.....(((((((....))))))).....))))))......((((((((.((((((...)))))).))))..)))).)))))))......	22	40	29	29
144	263	37	-49.7	-2.39	0.01	23.95	0.0269955	ATTGTCAATATGCTAAAACGCGGAGTAGCCCGTGTGAGCCCCTTTGGGGGCTTGAAGAGGCTGCCAGCCGGACTTCTGCTGGGTCATGGGCCCATCAGGATGGTCTTGGCGATTCTAGCC	.................((((((......))))))(((((((....))))))).....(((((...((((((((((((.((((((...)))))).))))..)))).)))).....)))))	........................((((((.....(((((((....))))))).....))))))..((((((((((((.((((((...)))))).))))..))))).)))..........	22	39	30	29
145	264	37	-51.5	-2.81	0	9.8	0.0693511	TTGTCAATATGCTAAAACGCGGAGTAGCCCGTGTGAGCCCCTTTGGGGGCTTGAAGAGGCTGCCAGCCGGACTTCTGCTGGGTCATGGGCCCATCAGGATGGTCTTGGCGATTCTAGCCT	................((((((......))))))(((((((....)))))))....((((((...((((((((((((.((((((...)))))).))))..)))).)))).....))))))	................((((((......))))))(((((((....)))))))....((((((...(((.((((((((.((((((...)))))).))))..))))..))).....))))))	21	39	30	30
146	265	37	-52.7	-3.23	0	6.08	0.0754486	TGTCAATATGCTAAAACGCGGAGTAGCCCGTGTGAGCCCCTTTGGGGGCTTGAAGAGGCTGCCAGCCGGACTTCTGCTGGGTCATGGGCCCATCAGGATGGTCTTGGCGATTCTAGCCTT	...............((((((......))))))(((((((....)))))))...(((((((...((((((((((((.((((((...)))))).))))..)))).)))).....)))))))	...............((((((......))))))(((((((....)))))))...(((((((...(((.((((((((.((((((...)))))).))))..))))..))).....)))))))	21	39	30	30
147	266	37	-53.3	-3.48	0	5.78	0.0531943	GTCAATATGCTAAAACGCGGAGTAGCCCGTGTGAGCCCCTTTGGGGGCTTGAAGAGGCTGCCAGCCGGACTTCTGCTGGGTCATGGGCCCATCAGGATGGTCTTGGCGATTCTAGCCTTT	..............((((((......))))))(((((((....)))))))..((((((((...((((((((((((.((((((...)))))).))))..)))).)))).....))))))))	..............((((((......))))))(((((((....)))))))..((((((((...(((.((((((((.((((((...)))))).))))..))))..))).....))))))))	21	39	30	30
148	267	37	-54.3	-4.29	0	5.36	0.0692899	TCAATATGCTAAAACGCGGAGTAGCCCGTGTGAGCCCCTTTGGGGGCTTGAAGAGGCTGCCAGCCGGACTTCTGCTGGGTCATGGGCCCATCAGGATGGTCTTGGCGATTCTAGCCTTTT	.............((((((......))))))(((((((....))))))).(((((((((...((((((((((((.((((((...)))))).))))..)))).)))).....)))))))))	.............((((((......))))))(((((((....))))))).(((((((((...(((.((((((((.((((((...)))))).))))..))))..))).....)))))))))	21	38	30	31
149	268	37	-55.4	-3.38	0	5	0.082176	CAATATGCTAAAACGCGGAGTAGCCCGTGTGAGCCCCTTTGGGGGCTTGAAGAGGCTGCCAGCCGGACTTCTGCTGGGTCATGGGCCCATCAGGATGGTCTTGGCGATTCTAGCCTTTTT	............((((((......))))))(((((((....)))))))((((((((((...((((((((((((.((((((...)))))).))))..)))).)))).....))))))))))	............((((((......))))))(((((((....)))))))((((((((((...(((.((((((((.((((((...)))))).))))..))))..))).....))))))))))	21	38	30	31
150	269	37	-56	-3.47	0	4.75	0.0975474	AATATGCTAAAACGCGGAGTAGCCCGTGTGAGCCCCTTTGGGGGCTTGAAGAGGCTGCCAGCCGGACTTCTGCTGGGTCATGGGCCCATCAGGATGGTCTTGGCGATTCTAGCCTTTTTG	...........((((((......))))))(((((((....)))))))((((((((((...((((((((((((.((((((...)))))).))))..)))).)))).....)))))))))).	...........((((((......))))))(((((((....)))))))((((((((((...(((.((((((((.((((((...)))))).))))..))))..))).....)))))))))).	21	39	29	31
151	270	37	-56	-3.48	0	5.02	0.0905282	ATATGCTAAAACGCGGAGTAGCCCGTGTGAGCCCCTTTGGGGGCTTGAAGAGGCTGCCAGCCGGACTTCTGCTGGGTCATGGGCCCATCAGGATGGTCTTGGCGATTCTAGCCTTTTTGA	..........((((((......))))))(((((((....)))))))((((((((((...((((((((((((.((((((...)))))).))))..)))).)))).....))))))))))..	..........((((((......))))))(((((((....)))))))((((((((((...(((.((((((((.((((((...)))))).))))..))))..))).....))))))))))..	21	39	29	31
152	271	37	-56	-3.8	0	5.45	0.0843645	TATGCTAAAACGCGGAGTAGCCCGTGTGAGCCCCTTTGGGGGCTTGAAGAGGCTGCCAGCCGGACTTCTGCTGGGTCATGGGCCCATCAGGATGGTCTTGGCGATTCTAGCCTTTTTGAG	.........((((((......))))))(((((((....)))))))((((((((((...((((((((((((.((((((...)))))).))))..)))).)))).....))))))))))...	.........((((((......))))))(((((((....)))))))((((((((((...(((.((((((((.((((((...)))))).))))..))))..))).....))))))))))...	20	40	29	31
153	272	37	-56	-4.23	0	6.11	0.0770275	ATGCTAAAACGCGGAGTAGCCCGTGTGAGCCCCTTTGGGGGCTTGAAGAGGCTGCCAGCCGGACTTCTGCTGGGTCATGGGCCCATCAGGATGGTCTTGGCGATTCTAGCCTTTTTGAGA	........((((((......))))))(((((((....)))))))((((((((((...((((((((((((.((((((...)))))).))))..)))).)))).....))))))))))....	........((((((......))))))(((((((....)))))))((((((((((...(((.((((((((.((((((...)))))).))))..))))..))).....))))))))))....	21	40	29	30
154	273	37	-56	-3.7	0	6.12	0.076857	TGCTAAAACGCGGAGTAGCCCGTGTGAGCCCCTTTGGGGGCTTGAAGAGGCTGCCAGCCGGACTTCTGCTGGGTCATGGGCCCATCAGGATGGTCTTGGCGATTCTAGCCTTTTTGAGAT	.......((((((......))))))(((((((....)))))))((((((((((...((((((((((((.((((((...)))))).))))..)))).)))).....)))))))))).....	.......((((((......))))))(((((((....)))))))((((((((((...(((.((((((((.((((((...)))))).))))..))))..))).....)))))))))).....	20	40	29	31
155	274	37	-56	-2.9	0	6.11	0.0771839	GCTAAAACGCGGAGTAGCCCGTGTGAGCCCCTTTGGGGGCTTGAAGAGGCTGCCAGCCGGACTTCTGCTGGGTCATGGGCCCATCAGGATGGTCTTGGCGATTCTAGCCTTTTTGAGATT	......((((((......))))))(((((((....)))))))((((((((((...((((((((((((.((((((...)))))).))))..)))).)))).....))))))))))......	......((((((......))))))(((((((....)))))))((((((((((...(((.((((((((.((((((...)))))).))))..))))..))).....))))))))))......	20	40	29	31
156	275	37	-56	-3.35	0	5.82	0.0793552	CTAAAACGCGGAGTAGCCCGTGTGAGCCCCTTTGGGGGCTTGAAGAGGCTGCCAGCCGGACTTCTGCTGGGTCATGGGCCCATCAGGATGGTCTTGGCGATTCTAGCCTTTTTGAGATTC	.....((((((......))))))(((((((....)))))))((((((((((...((((((((((((.((((((...)))))).))))..)))).)))).....)))))))))).......	.....((((((......))))))(((((((....)))))))((((((((((...(((.((((((((.((((((...)))))).))))..))))..))).....)))))))))).......	20	39	30	31
157	276	37	-56	-3.86	0	5.86	0.0789905	TAAAACGCGGAGTAGCCCGTGTGAGCCCCTTTGGGGGCTTGAAGAGGCTGCCAGCCGGACTTCTGCTGGGTCATGGGCCCATCAGGATGGTCTTGGCGATTCTAGCCTTTTTGAGATTCA	....((((((......))))))(((((((....)))))))((((((((((...((((((((((((.((((((...)))))).))))..)))).)))).....))))))))))........	....((((((......))))))(((((((....)))))))((((((((((...(((.((((((((.((((((...)))))).))))..))))..))).....))))))))))........	21	39	29	31
158	277	37	-56	-3.8	0	5.95	0.0781754	AAAACGCGGAGTAGCCCGTGTGAGCCCCTTTGGGGGCTTGAAGAGGCTGCCAGCCGGACTTCTGCTGGGTCATGGGCCCATCAGGATGGTCTTGGCGATTCTAGCCTTTTTGAGATTCAC	...((((((......))))))(((((((....)))))))((((((((((...((((((((((((.((((((...)))))).))))..)))).)))).....)))))))))).........	...((((((......))))))(((((((....)))))))((((((((((...(((.((((((((.((((((...)))))).))))..))))..))).....)))))))))).........	21	39	30	30
159	278	37	-56	-3.06	0	6.17	0.0768446	AAACGCGGAGTAGCCCGTGTGAGCCCCTTTGGGGGCTTGAAGAGGCTGCCAGCCGGACTTCTGCTGGGTCATGGGCCCATCAGGATGGTCTTGGCGATTCTAGCCTTTTTGAGATTCACG	..((((((......))))))(((((((....)))))))((((((((((...((((((((((((.((((((...)))))).))))..)))).)))).....))))))))))..........	..((((((......))))))(((((((....)))))))((((((((((...(((.((((((((.((((((...)))))).))))..))))..))).....))))))))))..........	20	40	30	30
160	279	37	-56	-3.17	0	6.52	0.0757744	AACGCGGAGTAGCCCGTGTGAGCCCCTTTGGGGGCTTGAAGAGGCTGCCAGCCGGACTTCTGCTGGGTCATGGGCCCATCAGGATGGTCTTGGCGATTCTAGCCTTTTTGAGATTCACGG	.((((((......))))))(((((((....)))))))((((((((((...((((((((((((.((((((...)))))).))))..)))).)))).....))))))))))...........	.((((((......))))))(((((((....)))))))((((((((((...(((.((((((((.((((((...)))))).))))..))))..))).....))))))))))...........	19	41	30	30
161	280	37	-55.6	-2.87	0.01	7.55	0.0683393	ACGCGGAGTAGCCCGTGTGAGCCCCTTTGGGGGCTTGAAGAGGCTGCCAGCCGGACTTCTGCTGGGTCATGGGCCCATCAGGATGGTCTTGGCGATTCTAGCCTTTTTGAGATTCACGGC	((((((......))))))(((((((....)))))))((((((((((...((((((((((((.((((((...)))))).))))..)))).)))).....))))))))))............	((((((......))))))(((((((....)))))))((((((((((...(((.((((((((.((((((...)))))).))))..))))..))).....))))))))))............	18	41	31	30
162	281	37	-53.8	-2.2	0.03	14.51	0.0263828	CGCGGAGTAGCCCGTGTGAGCCCCTTTGGGGGCTTGAAGAGGCTGCCAGCCGGACTTCTGCTGGGTCATGGGCCCATCAGGATGGTCTTGGCGATTCTAGCCTTTTTGAGATTCACGGCA	(((((......))))).(((((((....)))))))((((((((((...((((((((((((.((((((...)))))).))))..)))).)))).....)))))))))).............	.................(((((((....)))))))((((((((((...(((.((((((((.((((((...)))))).))))..))))..))).....)))))))))).............	18	41	31	30
163	282	37	-53.4	-2.75	0	14.96	0.0263289	GCGGAGTAGCCCGTGTGAGCCCCTTTGGGGGCTTGAAGAGGCTGCCAGCCGGACTTCTGCTGGGTCATGGGCCCATCAGGATGGTCTTGGCGATTCTAGCCTTTTTGAGATTCACGGCAA	((......))(((((.(((((((....)))))))((((((((((...((((((((((((.((((((...)))))).))))..)))).)))).....))))))))))......)))))...	...........((((.(((((((....)))))))((((((((((...(((.((((((((.((((((...)))))).))))..))))..))).....))))))))))......))))....	19	41	30	30
164	283	37	-52.7	-3.81	0	11.78	0.0180953	CGGAGTAGCCCGTGTGAGCCCCTTTGGGGGCTTGAAGAGGCTGCCAGCCGGACTTCTGCTGGGTCATGGGCCCATCAGGATGGTCTTGGCGATTCTAGCCTTTTTGAGATTCACGGCAAT	.......(((.(((.(((((((....)))))))((((((((((...((((((((((((.((((((...)))))).))))..)))).)))).....))))))))))......))))))...	.......((.((((.(((((((....)))))))((((((((((...(((.((((((((.((((((...)))))).))))..))))..))).....))))))))))......))))))...	19	40	30	31
165	284	37	-52.7	-3.21	0	11.59	0.015609	GGAGTAGCCCGTGTGAGCCCCTTTGGGGGCTTGAAGAGGCTGCCAGCCGGACTTCTGCTGGGTCATGGGCCCATCAGGATGGTCTTGGCGATTCTAGCCTTTTTGAGATTCACGGCAATC	......(((.(((.(((((((....)))))))((((((((((...((((((((((((.((((((...)))))).))))..)))).)))).....))))))))))......))))))....	......((.((((.(((((((....)))))))((((((((((...(((.((((((((.((((((...)))))).))))..))))..))).....))))))))))......))))))....	19	40	30	31
166	285	37	-53.1	-3.15	0	11.73	0.0117559	GAGTAGCCCGTGTGAGCCCCTTTGGGGGCTTGAAGAGGCTGCCAGCCGGACTTCTGCTGGGTCATGGGCCCATCAGGATGGTCTTGGCGATTCTAGCCTTTTTGAGATTCACGGCAATCA	((...(((.(((.(((((((....)))))))((((((((((...((((((((((((.((((((...)))))).))))..)))).)))).....))))))))))......))))))..)).	((...((.((((.(((((((....)))))))((((((((((...(((.((((((((.((((((...)))))).))))..))))..))).....))))))))))......))))))..)).	20	39	30	31
167	286	37	-52.7	-3.41	0	11.06	0.016971	AGTAGCCCGTGTGAGCCCCTTTGGGGGCTTGAAGAGGCTGCCAGCCGGACTTCTGCTGGGTCATGGGCCCATCAGGATGGTCTTGGCGATTCTAGCCTTTTTGAGATTCACGGCAATCAA	....(((.(((.(((((((....)))))))((((((((((...((((((((((((.((((((...)))))).))))..)))).)))).....))))))))))......))))))......	....((.((((.(((((((....)))))))((((((((((...(((.((((((((.((((((...)))))).))))..))))..))).....))))))))))......))))))......	21	38	30	31
168	287	37	-52.7	-3.67	0	10.67	0.0180514	GTAGCCCGTGTGAGCCCCTTTGGGGGCTTGAAGAGGCTGCCAGCCGGACTTCTGCTGGGTCATGGGCCCATCAGGATGGTCTTGGCGATTCTAGCCTTTTTGAGATTCACGGCAATCAAG	...(((.(((.(((((((....)))))))((((((((((...((((((((((((.((((((...)))))).))))..)))).)))).....))))))))))......)))))).......	...((.((((.(((((((....)))))))((((((((((...(((.((((((((.((((((...)))))).))))..))))..))).....))))))))))......)))))).......	20	39	30	31
169	288	37	-52.7	-2.89	0	9.63	0.0207078	TAGCCCGTGTGAGCCCCTTTGGGGGCTTGAAGAGGCTGCCAGCCGGACTTCTGCTGGGTCATGGGCCCATCAGGATGGTCTTGGCGATTCTAGCCTTTTTGAGATTCACGGCAATCAAGC	..(((.(((.(((((((....)))))))((((((((((...((((((((((((.((((((...)))))).))))..)))).)))).....))))))))))......))))))........	..((.((((.(((((((....)))))))((((((((((...(((.((((((((.((((((...)))))).))))..))))..))).....))))))))))......))))))........	20	38	31	31
170	289	37	-52.7	-3.18	0	10.64	0.0194819	AGCCCGTGTGAGCCCCTTTGGGGGCTTGAAGAGGCTGCCAGCCGGACTTCTGCTGGGTCATGGGCCCATCAGGATGGTCTTGGCGATTCTAGCCTTTTTGAGATTCACGGCAATCAAGCC	.(((.(((.(((((((....)))))))((((((((((...((((((((((((.((((((...)))))).))))..)))).)))).....))))))))))......)))))).........	.((.((((.(((((((....)))))))((((((((((...(((.((((((((.((((((...)))))).))))..))))..))).....))))))))))......)))))).........	20	38	32	30
171	290	37	-52.9	-3.3	0	12.97	0.0167087	GCCCGTGTGAGCCCCTTTGGGGGCTTGAAGAGGCTGCCAGCCGGACTTCTGCTGGGTCATGGGCCCATCAGGATGGTCTTGGCGATTCTAGCCTTTTTGAGATTCACGGCAATCAAGCCA	(((.(((.(((((((....)))))))((((((((((...((((((((((((.((((((...)))))).))))..)))).)))).....))))))))))......))))))..........	(...(((.(((((((....)))))))((((((((((...(((.((((((((.((((((...)))))).))))..))))..))).....))))))))))......)))..)..........	20	38	32	30
172	291	37	-52.4	-3.3	0	12.89	0.0235873	CCCGTGTGAGCCCCTTTGGGGGCTTGAAGAGGCTGCCAGCCGGACTTCTGCTGGGTCATGGGCCCATCAGGATGGTCTTGGCGATTCTAGCCTTTTTGAGATTCACGGCAATCAAGCCAT	.....(((((((((....)))))((((((((((((...((((((((((((.((((((...)))))).))))..)))).)))).....))))))))))))...))))(((......)))..	.....(((.(((((....))))).(((((((((((...(((.((((((((.((((((...)))))).))))..))))..))).....))))))))))).....)))(((......)))..	20	37	32	31
173	292	37	-52.4	-2.95	0	12.3	0.0258926	CCGTGTGAGCCCCTTTGGGGGCTTGAAGAGGCTGCCAGCCGGACTTCTGCTGGGTCATGGGCCCATCAGGATGGTCTTGGCGATTCTAGCCTTTTTGAGATTCACGGCAATCAAGCCATC	....(((((((((....)))))((((((((((((...((((((((((((.((((((...)))))).))))..)))).)))).....))))))))))))...))))(((......)))...	....(((((((((....)))))((((((((((((...(((.((((((((.((((((...)))))).))))..))))..))).....))))))))))))...))))(((......)))...	20	37	32	31
174	293	37	-52.4	-3.37	0	10.51	0.0296197	CGTGTGAGCCCCTTTGGGGGCTTGAAGAGGCTGCCAGCCGGACTTCTGCTGGGTCATGGGCCCATCAGGATGGTCTTGGCGATTCTAGCCTTTTTGAGATTCACGGCAATCAAGCCATCA	...(((((((((....)))))((((((((((((...((((((((((((.((((((...)))))).))))..)))).)))).....))))))))))))...))))(((......)))....	...(((((((((....)))))((((((((((((...(((.((((((((.((((((...)))))).))))..))))..))).....))))))))))))...))))(((......)))....	21	37	31	31
175	294	37	-52.4	-2.67	0	11.68	0.0235448	GTGTGAGCCCCTTTGGGGGCTTGAAGAGGCTGCCAGCCGGACTTCTGCTGGGTCATGGGCCCATCAGGATGGTCTTGGCGATTCTAGCCTTTTTGAGATTCACGGCAATCAAGCCATCAC	..(((((((((....)))))((((((((((((...((((((((((((.((((((...)))))).))))..)))).)))).....))))))))))))...))))(((......))).....	..(((.(((((....)))))((((((((((((...(((.((((((((.((((((...)))))).))))..))))..))).....))))))))))))....)))(((......))).....	21	37	31	31
176	295	37	-52.8	-3.59	0	10.93	0.0286432	TGTGAGCCCCTTTGGGGGCTTGAAGAGGCTGCCAGCCGGACTTCTGCTGGGTCATGGGCCCATCAGGATGGTCTTGGCGATTCTAGCCTTTTTGAGATTCACGGCAATCAAGCCATCACT	.(((((((((....)))))((((((((((((...((((((((((((.((((((...)))))).))))..)))).)))).....)))))))))))).......(((......))).)))).	.(((.(((((....)))))((((((((((((...(((.((((((((.((((((...)))))).))))..))))..))).....)))))))))))).......(((......)))..))).	21	36	31	32
177	296	37	-52.8	-2.98	0	11.05	0.0253828	GTGAGCCCCTTTGGGGGCTTGAAGAGGCTGCCAGCCGGACTTCTGCTGGGTCATGGGCCCATCAGGATGGTCTTGGCGATTCTAGCCTTTTTGAGATTCACGGCAATCAAGCCATCACTG	(((((((((....)))))((((((((((((...((((((((((((.((((((...)))))).))))..)))).)))).....)))))))))))).......(((......))).))))..	....(((((....)))))((((((((((((...(((.((((((((.((((((...)))))).))))..))))..))).....)))))))))))).......(((......))).......	21	37	31	31
178	297	37	-51.8	-2.63	0	7.6	0.0529708	TGAGCCCCTTTGGGGGCTTGAAGAGGCTGCCAGCCGGACTTCTGCTGGGTCATGGGCCCATCAGGATGGTCTTGGCGATTCTAGCCTTTTTGAGATTCACGGCAATCAAGCCATCACTGG	.(((((((....)))))))((((((((((...((((((((((((.((((((...)))))).))))..)))).)))).....)))))))))).........(((......)))........	.(((((((....)))))))((((((((((...(((.((((((((.((((((...)))))).))))..))))..))).....)))))))))).........(((......)))........	21	37	31	31
179	298	37	-51.7	-2.87	0	8.06	0.051489	GAGCCCCTTTGGGGGCTTGAAGAGGCTGCCAGCCGGACTTCTGCTGGGTCATGGGCCCATCAGGATGGTCTTGGCGATTCTAGCCTTTTTGAGATTCACGGCAATCAAGCCATCACTGGG	(((((((....)))))))((((((((((...((((((((((((.((((((...)))))).))))..)))).)))).....)))))))))).........(((......))).........	(((((((....)))))))((((((((((...(((.((((((((.((((((...)))))).))))..))))..))).....)))))))))).........(((......))).........	21	38	31	30
180	299	37	-50.3	-3.08	0	12.22	0.0251339	AGCCCCTTTGGGGGCTTGAAGAGGCTGCCAGCCGGACTTCTGCTGGGTCATGGGCCCATCAGGATGGTCTTGGCGATTCTAGCCTTTTTGAGATTCACGGCAATCAAGCCATCACTGGGT	.(((((....)))))((((((((((((...((((((((((((.((((((...)))))).))))..)))).)))).....)))))))))))).......(((......)))..........	.(((((....)))))((((((((((((...(((.((((((((.((((((...)))))).))))..))))..))).....)))))))))))).......(((......)))..........	21	37	31	31
181	300	37	-52	-3.08	0	7.73	0.0799162	GCCCCTTTGGGGGCTTGAAGAGGCTGCCAGCCGGACTTCTGCTGGGTCATGGGCCCATCAGGATGGTCTTGGCGATTCTAGCCTTTTTGAGATTCACGGCAATCAAGCCATCACTGGGTC	(((((....)))))((((((((((((...((((((((((((.((((((...)))))).))))..)))).)))).....))))))))))))((((((.(((......))).....))))))	(((((....)))))((((((((((((...(((.((((((((.((((((...)))))).))))..))))..))).....))))))))))))((((((.(((......))).....))))))	20	37	32	31
182	301	37	-49.2	-2.56	0	20.17	0.0260197	CCCCTTTGGGGGCTTGAAGAGGCTGCCAGCCGGACTTCTGCTGGGTCATGGGCCCATCAGGATGGTCTTGGCGATTCTAGCCTTTTTGAGATTCACGGCAATCAAGCCATCACTGGGTCT	((((....))))(((((((((((((...((((((((((((.((((((...)))))).))))..)))).)))).....)))))))))))))......(((......)))............	((((....)))).((((((((((((...(((.((((((((.((((((...)))))).))))..))))..))).....)))))))))))).......(((......)))............	20	36	32	32
183	302	37	-48.5	-2.12	0.03	21.26	0.0293095	CCCTTTGGGGGCTTGAAGAGGCTGCCAGCCGGACTTCTGCTGGGTCATGGGCCCATCAGGATGGTCTTGGCGATTCTAGCCTTTTTGAGATTCACGGCAATCAAGCCATCACTGGGTCTC	(((....)))....((((((((((...((((((((((((.((((((...)))))).))))..)))).)))).....))))))))))((((((((.(((......))).....))))))))	(((..((..(((((.(((((((((...(((.((((((((.((((((...)))))).))))..))))..))).....))))))))).................)))))..))..)))....	20	36	32	32
184	303	37	-46.7	-2.34	0	19.51	0.0221753	CCTTTGGGGGCTTGAAGAGGCTGCCAGCCGGACTTCTGCTGGGTCATGGGCCCATCAGGATGGTCTTGGCGATTCTAGCCTTTTTGAGATTCACGGCAATCAAGCCATCACTGGGTCTCA	((....)).....((((((((((...((((((((((((.((((((...)))))).))))..)))).)))).....))))))))))((((((((.(((......))).....)))))))).	.............((((((((((...(((.((((((((.((((((...)))))).))))..))))..))).....))))))))))((((((((.(((......))).....)))))))).	21	36	31	32
185	304	37	-46.4	-2.45	0	22.31	0.0429263	CTTTGGGGGCTTGAAGAGGCTGCCAGCCGGACTTCTGCTGGGTCATGGGCCCATCAGGATGGTCTTGGCGATTCTAGCCTTTTTGAGATTCACGGCAATCAAGCCATCACTGGGTCTCAT	...(((.(((((....))))).)))((((((((((((.((((((...)))))).))))..)))).))))..............(((((((((.(((......))).....))))))))).	.........................((((((((((((.((((((...)))))).))))..))))).)))..............(((((((((.(((......))).....))))))))).	21	36	30	33
186	305	37	-46.4	-2	0.05	22.07	0.0444904	TTTGGGGGCTTGAAGAGGCTGCCAGCCGGACTTCTGCTGGGTCATGGGCCCATCAGGATGGTCTTGGCGATTCTAGCCTTTTTGAGATTCACGGCAATCAAGCCATCACTGGGTCTCATC	..(((.(((((....))))).)))((((((((((((.((((((...)))))).))))..)))).))))..............(((((((((.(((......))).....)))))))))..	........................((((((((((((.((((((...)))))).))))..))))).)))..............(((((((((.(((......))).....)))))))))..	21	36	30	33
187	306	37	-46.4	-2.16	0	22.25	0.0432849	TTGGGGGCTTGAAGAGGCTGCCAGCCGGACTTCTGCTGGGTCATGGGCCCATCAGGATGGTCTTGGCGATTCTAGCCTTTTTGAGATTCACGGCAATCAAGCCATCACTGGGTCTCATCA	.(((.(((((....))))).)))((((((((((((.((((((...)))))).))))..)))).))))..............(((((((((.(((......))).....)))))))))...	.......................((((((((((((.((((((...)))))).))))..))))).)))..............(((((((((.(((......))).....)))))))))...	22	36	30	32
188	307	37	-46.2	-2.33	0.01	23.03	0.0333244	TGGGGGCTTGAAGAGGCTGCCAGCCGGACTTCTGCTGGGTCATGGGCCCATCAGGATGGTCTTGGCGATTCTAGCCTTTTTGAGATTCACGGCAATCAAGCCATCACTGGGTCTCATCAA	(((.(((((....))))).)))((((((((((((.((((((...)))))).))))..)))).))))..............(((((((((.(((......))).....)))))))))....	......................((((((((((((.((((((...)))))).))))..))))).)))..............(((((((((.(((......))).....)))))))))....	23	36	30	31
189	308	37	-45.8	-2.24	0	23.19	0.0271389	GGGGGCTTGAAGAGGCTGCCAGCCGGACTTCTGCTGGGTCATGGGCCCATCAGGATGGTCTTGGCGATTCTAGCCTTTTTGAGATTCACGGCAATCAAGCCATCACTGGGTCTCATCAAT	........((((((((((...((((((((((((.((((((...)))))).))))..)))).)))).....))))))))))((((((((.(((......))).....))))))))......	..........(((((((....((((((((((((.((((((...)))))).))))..))))).)))......))))))).(((((((((.(((......))).....))))))))).....	23	36	30	31
190	309	37	-45.8	-3.05	0	18.22	0.0435066	GGGGCTTGAAGAGGCTGCCAGCCGGACTTCTGCTGGGTCATGGGCCCATCAGGATGGTCTTGGCGATTCTAGCCTTTTTGAGATTCACGGCAATCAAGCCATCACTGGGTCTCATCAATA	.......((((((((((...((((((((((((.((((((...)))))).))))..)))).)))).....))))))))))((((((((.(((......))).....)))))))).......	.......((((((((((...(((.((((((((.((((((...)))))).))))..))))..))).....))))))))))((((((((.(((......))).....)))))))).......	24	35	30	31
191	310	37	-45.8	-2.76	0	10.5	0.0593438	GGGCTTGAAGAGGCTGCCAGCCGGACTTCTGCTGGGTCATGGGCCCATCAGGATGGTCTTGGCGATTCTAGCCTTTTTGAGATTCACGGCAATCAAGCCATCACTGGGTCTCATCAATAG	......((((((((((...((((((((((((.((((((...)))))).))))..)))).)))).....))))))))))((((((((.(((......))).....))))))))........	......((((((((((...(((.((((((((.((((((...)))))).))))..))))..))).....))))))))))((((((((.(((......))).....))))))))........	24	35	30	31
192	311	37	-45.8	-3.26	0	7.91	0.0606974	GGCTTGAAGAGGCTGCCAGCCGGACTTCTGCTGGGTCATGGGCCCATCAGGATGGTCTTGGCGATTCTAGCCTTTTTGAGATTCACGGCAATCAAGCCATCACTGGGTCTCATCAATAGA	.....((((((((((...((((((((((((.((((((...)))))).))))..)))).)))).....))))))))))((((((((.(((......))).....)))))))).........	.....((((((((((...(((.((((((((.((((((...)))))).))))..))))..))).....))))))))))((((((((.(((......))).....)))))))).........	25	34	30	31
193	312	37	-45.8	-2.64	0	7.1	0.0532879	GCTTGAAGAGGCTGCCAGCCGGACTTCTGCTGGGTCATGGGCCCATCAGGATGGTCTTGGCGATTCTAGCCTTTTTGAGATTCACGGCAATCAAGCCATCACTGGGTCTCATCAATAGAT	....((((((((((...((((((((((((.((((((...)))))).))))..)))).)))).....))))))))))((((((((.(((......))).....))))))))..........	....((((((((((...(((.((((((((.((((((...)))))).))))..))))..))).....))))))))))((((((((.(((......))).....))))))))..........	25	33	30	32
194	313	37	-45.8	-3.07	0	8.09	0.0429906	CTTGAAGAGGCTGCCAGCCGGACTTCTGCTGGGTCATGGGCCCATCAGGATGGTCTTGGCGATTCTAGCCTTTTTGAGATTCACGGCAATCAAGCCATCACTGGGTCTCATCAATAGATG	...((((((((((...((((((((((((.((((((...)))))).))))..)))).)))).....))))))))))((((((((.(((......))).....))))))))...........	...((((((((((...(((.((((((((.((((((...)))))).))))..))))..))).....))))))))))((((((((.(((......))).....))))))))...........	25	33	30	32
195	314	37	-45.8	-2.98	0	8.59	0.032218	TTGAAGAGGCTGCCAGCCGGACTTCTGCTGGGTCATGGGCCCATCAGGATGGTCTTGGCGATTCTAGCCTTTTTGAGATTCACGGCAATCAAGCCATCACTGGGTCTCATCAATAGATGG	..((((((((((...((((((((((((.((((((...)))))).))))..)))).)))).....))))))))))((((((((.(((......))).....))))))))............	..((((((((((...(((.((((((((.((((((...)))))).))))..))))..))).....))))))))))((((((((.(((......))).....))))))))............	25	34	29	32
196	315	37	-45.8	-2.5	0	8.71	0.0335798	TGAAGAGGCTGCCAGCCGGACTTCTGCTGGGTCATGGGCCCATCAGGATGGTCTTGGCGATTCTAGCCTTTTTGAGATTCACGGCAATCAAGCCATCACTGGGTCTCATCAATAGATGGG	.((((((((((...((((((((((((.((((((...)))))).))))..)))).)))).....))))))))))((((((((.(((......))).....)))))))).............	.((((((((((...(((.((((((((.((((((...)))))).))))..))))..))).....))))))))))((((((((.(((......))).....)))))))).............	25	35	29	31
197	316	37	-45.7	-2.37	0.01	11.95	0.0269146	GAAGAGGCTGCCAGCCGGACTTCTGCTGGGTCATGGGCCCATCAGGATGGTCTTGGCGATTCTAGCCTTTTTGAGATTCACGGCAATCAAGCCATCACTGGGTCTCATCAATAGATGGGG	((((((((((...((((((((((((.((((((...)))))).))))..)))).)))).....))))))))))((((((((.(((......))).....))))))))..............	((((((((((...(((.((((((((.((((((...)))))).))))..))))..))).....))))))))))((((((((.(((......))).....))))))))(((....)))....	25	36	29	30
198	317	37	-44.7	-1.6	0.09	11.2	0.0310762	AAGAGGCTGCCAGCCGGACTTCTGCTGGGTCATGGGCCCATCAGGATGGTCTTGGCGATTCTAGCCTTTTTGAGATTCACGGCAATCAAGCCATCACTGGGTCTCATCAATAGATGGGGT	(((((((((...((((((((((((.((((((...)))))).))))..)))).)))).....)))))))))(((((((((.(((......))).....)))))))))..............	(((((((((...(((.((((((((.((((((...)))))).))))..))))..))).....)))))))))(((((((((.(((......))).....)))))))))..............	25	35	29	31
199	318	37	-43.8	-1.55	0.05	11.94	0.0259456	AGAGGCTGCCAGCCGGACTTCTGCTGGGTCATGGGCCCATCAGGATGGTCTTGGCGATTCTAGCCTTTTTGAGATTCACGGCAATCAAGCCATCACTGGGTCTCATCAATAGATGGGGTT	.(((((((...((((((((((((.((((((...)))))).))))..)))).)))).....)))))))..(((((((((.(((......))).....)))))))))...............	.(((((((...(((.((((((((.((((((...)))))).))))..))))..))).....)))))))..(((((((((.(((......))).....)))))))))...............	24	35	29	32
200	319	37	-43.2	-1.82	0.03	15.29	0.0307453	GAGGCTGCCAGCCGGACTTCTGCTGGGTCATGGGCCCATCAGGATGGTCTTGGCGATTCTAGCCTTTTTGAGATTCACGGCAATCAAGCCATCACTGGGTCTCATCAATAGATGGGGTTC	(((((((...((((((((((((.((((((...)))))).))))..)))).)))).....)))))))..(((((((((.(((......))).....)))))))))................	(((((((...(((.((((((((.((((((...)))))).))))..))))..))).....)))))))...((((((((.(((......))).....)))))))).................	23	35	30	32
201	320	37	-42.7	-2.33	0	15.63	0.0198492	AGGCTGCCAGCCGGACTTCTGCTGGGTCATGGGCCCATCAGGATGGTCTTGGCGATTCTAGCCTTTTTGAGATTCACGGCAATCAAGCCATCACTGGGTCTCATCAATAGATGGGGTTCA	((((((...((((((((((((.((((((...)))))).))))..)))).)))).....)))))).............(((......))).....(((((((((((....)))))))))))	((((((...(((.((((((((.((((((...)))))).))))..))))..))).....)))))).............(((......)))......((((((((((....)))))))))).	24	34	30	32
202	321	37	-45.2	-2.2	0.01	14.94	0.0479776	GGCTGCCAGCCGGACTTCTGCTGGGTCATGGGCCCATCAGGATGGTCTTGGCGATTCTAGCCTTTTTGAGATTCACGGCAATCAAGCCATCACTGGGTCTCATCAATAGATGGGGTTCAG	(((((...((((((((((((.((((((...)))))).))))..)))).)))).....)))))..............(((......)))....((((((((((((....))))))))))))	(((((...(((.((((((((.((((((...)))))).))))..))))..))).....)))))..............(((......)))....((((((((((((....))))))))))))	23	35	30	32
203	322	37	-43	-2.02	0.03	15.77	0.0296569	GCTGCCAGCCGGACTTCTGCTGGGTCATGGGCCCATCAGGATGGTCTTGGCGATTCTAGCCTTTTTGAGATTCACGGCAATCAAGCCATCACTGGGTCTCATCAATAGATGGGGTTCAGT	((((...((((((((((((.((((((...)))))).))))..)))).)))).....))))...............(((......)))...(((((((((((((....)))))))))))))	((((...(((.((((((((.((((((...)))))).))))..))))..))).....))))...............(((......)))...(((((((((((((....)))))))))))))	23	34	30	33
204	323	37	-44.3	-2.4	0	15.88	0.0265281	CTGCCAGCCGGACTTCTGCTGGGTCATGGGCCCATCAGGATGGTCTTGGCGATTCTAGCCTTTTTGAGATTCACGGCAATCAAGCCATCACTGGGTCTCATCAATAGATGGGGTTCAGTG	..((((...(((((((((.((((((...)))))).))))..)))))))))((.(((..........))).))..(((......)))..((((((((((((((....))))))))))))))	..(((....(((((((((.((((((...)))))).))))..))))).)))((.(((..........))).))..(((......)))..((((((((((((((....))))))))))))))	23	34	30	33
205	324	37	-45.7	-2.21	0.01	15.78	0.0178116	TGCCAGCCGGACTTCTGCTGGGTCATGGGCCCATCAGGATGGTCTTGGCGATTCTAGCCTTTTTGAGATTCACGGCAATCAAGCCATCACTGGGTCTCATCAATAGATGGGGTTCAGTGG	.((((...(((((((((.((((((...)))))).))))..)))))))))((.(((..........))).))..(((......)))..((((((((((((((....)))))))))))))).	.(((....(((((((((.((((((...)))))).))))..))))).)))((.(((..........))).))..(((......)))..((((((((((((((....)))))))))))))).	23	35	29	33
206	325	37	-46	-2.44	0	14.63	0.0204009	GCCAGCCGGACTTCTGCTGGGTCATGGGCCCATCAGGATGGTCTTGGCGATTCTAGCCTTTTTGAGATTCACGGCAATCAAGCCATCACTGGGTCTCATCAATAGATGGGGTTCAGTGGG	((((...(((((((((.((((((...)))))).))))..)))))))))((.(((..........))).))..(((......))).(((((((((((((((....))))))))))))))).	((((...(((((((((.((((((...)))))).))))..)))))))))((.(((..........))).))..(((......)))..((((((((((((((....))))))))))))))..	23	36	29	32
207	326	37	-46.5	-2.63	0	12.58	0.0339467	CCAGCCGGACTTCTGCTGGGTCATGGGCCCATCAGGATGGTCTTGGCGATTCTAGCCTTTTTGAGATTCACGGCAATCAAGCCATCACTGGGTCTCATCAATAGATGGGGTTCAGTGGGG	((.((((((((((((.((((((...)))))).))))..)))).))))((.(((..........))).))..(((......)))..((((((((((((((....)))))))))))))))).	((.(((.((((((((.((((((...)))))).))))..))))..)))((.(((..........))).))..(((......)))..((((((((((((((....)))))))))))))))).	23	36	29	32
208	327	37	-46.1	-2.95	0	18.11	0.0201602	CAGCCGGACTTCTGCTGGGTCATGGGCCCATCAGGATGGTCTTGGCGATTCTAGCCTTTTTGAGATTCACGGCAATCAAGCCATCACTGGGTCTCATCAATAGATGGGGTTCAGTGGGGA	..((((((((((((.((((((...)))))).))))..)))).))))((((...(((..............)))))))...((.(((((((((((((((....))))))))))))))))).	..(((.((((((((.((((((...)))))).))))..))))..)))..................................((.(((((((((((((((....))))))))))))))))).	24	36	28	32
209	328	37	-46.1	-2.27	0	18.22	0.0201366	AGCCGGACTTCTGCTGGGTCATGGGCCCATCAGGATGGTCTTGGCGATTCTAGCCTTTTTGAGATTCACGGCAATCAAGCCATCACTGGGTCTCATCAATAGATGGGGTTCAGTGGGGAA	.((((((((((((.((((((...)))))).))))..)))).))))((((...(((..............)))))))...((.(((((((((((((((....)))))))))))))))))..	.(((.((((((((.((((((...)))))).))))..))))..)))..................................((.(((((((((((((((....)))))))))))))))))..	25	36	27	32
210	329	37	-46.4	-3.18	0	17.87	0.0206969	GCCGGACTTCTGCTGGGTCATGGGCCCATCAGGATGGTCTTGGCGATTCTAGCCTTTTTGAGATTCACGGCAATCAAGCCATCACTGGGTCTCATCAATAGATGGGGTTCAGTGGGGAAA	((((((((((((.((((((...)))))).))))..)))).))))((((...(((..............)))))))...((.(((((((((((((((....)))))))))))))))))...	(((.((((((((.((((((...)))))).))))..))))..)))..................................((.(((((((((((((((....)))))))))))))))))...	25	36	27	32
211	330	37	-44.1	-2.49	0	14.26	0.0280471	CCGGACTTCTGCTGGGTCATGGGCCCATCAGGATGGTCTTGGCGATTCTAGCCTTTTTGAGATTCACGGCAATCAAGCCATCACTGGGTCTCATCAATAGATGGGGTTCAGTGGGGAAAA	(((((((((((.((((((...)))))).))))..))))).(((.......)))..............(((......)))..((((((((((((((....)))))))))))))))).....	(((((((((((.((((((...)))))).))))..))))).(((.......)))..............(((......)))..((((((((((((((....)))))))))))))).))....	26	35	27	32
212	331	37	-42.8	-2.31	0	15.52	0.0237785	CGGACTTCTGCTGGGTCATGGGCCCATCAGGATGGTCTTGGCGATTCTAGCCTTTTTGAGATTCACGGCAATCAAGCCATCACTGGGTCTCATCAATAGATGGGGTTCAGTGGGGAAAAA	.(((((((((.((((((...)))))).))))..))))).(((.......)))..............(((......))).(((((((((((((((....))))))))))))))).......	.(((((((((.((((((...)))))).))))..))))).(((.......)))...........................(((((((((((((((....))))))))))))))).......	27	35	26	32
213	332	37	-42.3	-2.26	0	16.19	0.020423	GGACTTCTGCTGGGTCATGGGCCCATCAGGATGGTCTTGGCGATTCTAGCCTTTTTGAGATTCACGGCAATCAAGCCATCACTGGGTCTCATCAATAGATGGGGTTCAGTGGGGAAAAAA	(((((((((.((((((...)))))).))))..))))).(((.......)))..............(((......))).(((((((((((((((....)))))))))))))))........	(((((((((.((((((...)))))).))))..))))).(((.......)))...........................(((((((((((((((....)))))))))))))))........	28	35	25	32
214	333	37	-41.8	-2.97	0	16.96	0.0229698	GACTTCTGCTGGGTCATGGGCCCATCAGGATGGTCTTGGCGATTCTAGCCTTTTTGAGATTCACGGCAATCAAGCCATCACTGGGTCTCATCAATAGATGGGGTTCAGTGGGGAAAAAAG	((((((((.((((((...)))))).))))..))))..(((.......)))..............(((......))).(((((((((((((((....))))))))))))))).........	((((((((.((((((...)))))).))))..))))..(((.......)))...........................(((((((((((((((....))))))))))))))).........	28	35	25	32
215	334	37	-41.3	-2.18	0.03	10.4	0.0539394	ACTTCTGCTGGGTCATGGGCCCATCAGGATGGTCTTGGCGATTCTAGCCTTTTTGAGATTCACGGCAATCAAGCCATCACTGGGTCTCATCAATAGATGGGGTTCAGTGGGGAAAAAAGA	..(((((.((((((...)))))).))))).(((((((((.......))).....))))))...(((......))).(((((((((((((((....)))))))))))))))..........	..(((((.((((((...)))))).)))))..((((((((.......))).....)))))....(((......))).(((((((((((((((....)))))))))))))))..........	29	34	25	32
216	335	37	-41.3	-2.18	0	10.94	0.0534119	CTTCTGCTGGGTCATGGGCCCATCAGGATGGTCTTGGCGATTCTAGCCTTTTTGAGATTCACGGCAATCAAGCCATCACTGGGTCTCATCAATAGATGGGGTTCAGTGGGGAAAAAAGAG	.(((((.((((((...)))))).))))).(((((((((.......))).....))))))...(((......))).(((((((((((((((....)))))))))))))))...........	.(((((.((((((...)))))).)))))..((((((((.......))).....)))))....(((......))).(((((((((((((((....)))))))))))))))...........	28	35	25	32
217	336	37	-41.1	-2.37	0	12.34	0.0560018	TTCTGCTGGGTCATGGGCCCATCAGGATGGTCTTGGCGATTCTAGCCTTTTTGAGATTCACGGCAATCAAGCCATCACTGGGTCTCATCAATAGATGGGGTTCAGTGGGGAAAAAAGAGG	(((((.((((((...)))))).))))).(((((((((.......))).....))))))...(((......))).(((((((((((((((....)))))))))))))))............	(((((.((((((...)))))).)))))..((((((((.......))).....)))))....(((......))).(((((((((((((((....)))))))))))))))............	28	36	24	32
218	337	37	-41.3	-1.72	0.05	14.34	0.0137896	TCTGCTGGGTCATGGGCCCATCAGGATGGTCTTGGCGATTCTAGCCTTTTTGAGATTCACGGCAATCAAGCCATCACTGGGTCTCATCAATAGATGGGGTTCAGTGGGGAAAAAAGAGGC	.(((.((((((...)))))).)))(((.((....)).)))...((((((((....(((..(((......))).(((((((((((((((....))))))))))))))))))..))))))))	.(((.((((((...)))))).)))(((.((....)).)))...((((((((.........(((......)))..((((((((((((((....))))))))))))))......))))))))	28	36	25	31
219	338	37	-42.7	-2.7	0	12.16	0.0133353	CTGCTGGGTCATGGGCCCATCAGGATGGTCTTGGCGATTCTAGCCTTTTTGAGATTCACGGCAATCAAGCCATCACTGGGTCTCATCAATAGATGGGGTTCAGTGGGGAAAAAAGAGGCT	(((.((((((...)))))).)))(((.((....)).)))..(((((((((....(((..(((......))).(((((((((((((((....))))))))))))))))))..)))))))))	.((.((((((...)))))).)).(((.((....)).)))..(((((((((.........(((......)))..((((((((((((((....))))))))))))))......)))))))))	28	36	25	31
220	339	37	-43.1	-2.87	0	11.02	0.0134789	TGCTGGGTCATGGGCCCATCAGGATGGTCTTGGCGATTCTAGCCTTTTTGAGATTCACGGCAATCAAGCCATCACTGGGTCTCATCAATAGATGGGGTTCAGTGGGGAAAAAAGAGGCTA	((.((((((...)))))).))((((.((....)).))))((((((((((....(((..(((......))).(((((((((((((((....))))))))))))))))))..))))))))))	.(.((((((...)))))).).((((.((....)).)))).(((((((((.........(((......)))..((((((((((((((....))))))))))))))......))))))))).	29	36	24	31
221	340	37	-43.2	-3.05	0	12.13	0.01318	GCTGGGTCATGGGCCCATCAGGATGGTCTTGGCGATTCTAGCCTTTTTGAGATTCACGGCAATCAAGCCATCACTGGGTCTCATCAATAGATGGGGTTCAGTGGGGAAAAAAGAGGCTAT	(.((((((...)))))).)(((((.((....)).)))))(((((((((....(((..(((......))).(((((((((((((((....))))))))))))))))))..)))))))))..	..((((((...))))))...((((.((....)).))))((((((((((.........(((......)))..((((((((((((((....))))))))))))))......)))))))))).	29	36	24	31
222	341	37	-43	-3.31	0	13.08	0.0172399	CTGGGTCATGGGCCCATCAGGATGGTCTTGGCGATTCTAGCCTTTTTGAGATTCACGGCAATCAAGCCATCACTGGGTCTCATCAATAGATGGGGTTCAGTGGGGAAAAAAGAGGCTATG	.((((((...))))))..(((((.((....)).)))))(((((((((....(((..(((......))).(((((((((((((((....))))))))))))))))))..)))))))))...	.((((((...))))))...((((.((....)).))))((((((((((.........(((......)))..((((((((((((((....))))))))))))))......))))))))))..	29	36	24	31
223	342	37	-42.8	-3.51	0	14.43	0.0127938	TGGGTCATGGGCCCATCAGGATGGTCTTGGCGATTCTAGCCTTTTTGAGATTCACGGCAATCAAGCCATCACTGGGTCTCATCAATAGATGGGGTTCAGTGGGGAAAAAAGAGGCTATGG	((((((...))))))..(((((.((....)).)))))(((((((((....(((..(((......))).(((((((((((((((....))))))))))))))))))..)))))))))....	((((((...))))))...((((.(......).))))((((((((((.........(((......)))..((((((((((((((....))))))))))))))......))))))))))...	29	37	23	31
224	343	37	-42.3	-2.3	0.01	16.31	0.00828602	GGGTCATGGGCCCATCAGGATGGTCTTGGCGATTCTAGCCTTTTTGAGATTCACGGCAATCAAGCCATCACTGGGTCTCATCAATAGATGGGGTTCAGTGGGGAAAAAAGAGGCTATGGA	(((((...)))))...(((((.((....)).)))))(((((((((....(((..(((......))).(((((((((((((((....))))))))))))))))))..))))))))).....	(((((...)))))..((((.....))))......(((((((((((.........(((......)))..((((((((((((((....))))))))))))))......)))))))))).)..	30	37	23	30
225	344	37	-41.3	-2.82	0	13.71	0.00876115	GGTCATGGGCCCATCAGGATGGTCTTGGCGATTCTAGCCTTTTTGAGATTCACGGCAATCAAGCCATCACTGGGTCTCATCAATAGATGGGGTTCAGTGGGGAAAAAAGAGGCTATGGAA	.((((.(((((.........)))))))))..(((((((((((((....(((..(((......))).(((((((((((((((....))))))))))))))))))..)))))))))).))).	.((((.(((((.(......))))))))))..(((((((((((((.........(((......)))..((((((((((((((....))))))))))))))......)))))))))).))).	31	36	23	30
226	345	37	-41.4	-3.4	0	13.44	0.00772675	GTCATGGGCCCATCAGGATGGTCTTGGCGATTCTAGCCTTTTTGAGATTCACGGCAATCAAGCCATCACTGGGTCTCATCAATAGATGGGGTTCAGTGGGGAAAAAAGAGGCTATGGAAA	((((.(((((.........)))))))))..(((((((((((((....(((..(((......))).(((((((((((((((....))))))))))))))))))..)))))))))).)))..	((((.(((((.((....)))))))))))...((((((((((((.........(((......)))..((((((((((((((....))))))))))))))......)))))))))).))...	32	35	23	30
227	346	37	-37.4	-2.1	0.01	20.21	0.00242295	TCATGGGCCCATCAGGATGGTCTTGGCGATTCTAGCCTTTTTGAGATTCACGGCAATCAAGCCATCACTGGGTCTCATCAATAGATGGGGTTCAGTGGGGAAAAAAGAGGCTATGGAAAT	......(((.((((...))))...)))..(((((((((((((....(((..(((......))).(((((((((((((((....))))))))))))))))))..)))))))))).)))...	....(((.............)))........(((((((((((.........(((......)))..((((((((((((((....))))))))))))))......)))))))))).).....	32	34	23	31
228	347	37	-37.4	-2.23	0.01	20.27	0.00386108	CATGGGCCCATCAGGATGGTCTTGGCGATTCTAGCCTTTTTGAGATTCACGGCAATCAAGCCATCACTGGGTCTCATCAATAGATGGGGTTCAGTGGGGAAAAAAGAGGCTATGGAAATA	.....(((.((((...))))...)))..(((((((((((((....(((..(((......))).(((((((((((((((....))))))))))))))))))..)))))))))).)))....	..............................(((((((((((.........(((......)))..((((((((((((((....))))))))))))))......)))))))))).)......	33	34	23	30
229	348	37	-37.4	-2.84	0	19.94	0.00594565	ATGGGCCCATCAGGATGGTCTTGGCGATTCTAGCCTTTTTGAGATTCACGGCAATCAAGCCATCACTGGGTCTCATCAATAGATGGGGTTCAGTGGGGAAAAAAGAGGCTATGGAAATAA	....(((.((((...))))...)))..(((((((((((((....(((..(((......))).(((((((((((((((....))))))))))))))))))..)))))))))).))).....	..............................((((((((((.........(((......)))..((((((((((((((....))))))))))))))......)))))))))).........	34	34	22	30
230	349	37	-37.4	-1.71	0.03	19.95	0.00592127	TGGGCCCATCAGGATGGTCTTGGCGATTCTAGCCTTTTTGAGATTCACGGCAATCAAGCCATCACTGGGTCTCATCAATAGATGGGGTTCAGTGGGGAAAAAAGAGGCTATGGAAATAAT	...(((.((((...))))...)))..(((((((((((((....(((..(((......))).(((((((((((((((....))))))))))))))))))..)))))))))).)))......	.............................((((((((((.........(((......)))..((((((((((((((....))))))))))))))......))))))))))..........	33	34	22	31
231	350	37	-37.4	-2.35	0	19.66	0.00701945	GGGCCCATCAGGATGGTCTTGGCGATTCTAGCCTTTTTGAGATTCACGGCAATCAAGCCATCACTGGGTCTCATCAATAGATGGGGTTCAGTGGGGAAAAAAGAGGCTATGGAAATAATA	..(((.((((...))))...)))..(((((((((((((....(((..(((......))).(((((((((((((((....))))))))))))))))))..)))))))))).))).......	............................((((((((((.........(((......)))..((((((((((((((....))))))))))))))......))))))))))...........	34	34	22	30
232	351	37	-37.4	-2.78	0	18.75	0.0087128	GGCCCATCAGGATGGTCTTGGCGATTCTAGCCTTTTTGAGATTCACGGCAATCAAGCCATCACTGGGTCTCATCAATAGATGGGGTTCAGTGGGGAAAAAAGAGGCTATGGAAATAATAA	.(((.((((...))))...)))..(((((((((((((....(((..(((......))).(((((((((((((((....))))))))))))))))))..)))))))))).)))........	.(((...............))).....((((((((((.........(((......)))..((((((((((((((....))))))))))))))......))))))))))............	35	33	22	30
233	352	37	-37.5	-2.79	0.01	17.79	0.0102916	GCCCATCAGGATGGTCTTGGCGATTCTAGCCTTTTTGAGATTCACGGCAATCAAGCCATCACTGGGTCTCATCAATAGATGGGGTTCAGTGGGGAAAAAAGAGGCTATGGAAATAATAAA	(((.((((...))))...)))..(((((((((((((....(((..(((......))).(((((((((((((((....))))))))))))))))))..)))))))))).))).........	(((...............))).....((((((((((.........(((......)))..((((((((((((((....))))))))))))))......)))))))))).............	36	32	22	30
234	353	37	-36.8	-3.06	0	17.44	0.0102928	CCCATCAGGATGGTCTTGGCGATTCTAGCCTTTTTGAGATTCACGGCAATCAAGCCATCACTGGGTCTCATCAATAGATGGGGTTCAGTGGGGAAAAAAGAGGCTATGGAAATAATAAAG	.((((.(((((.((....)).)))))(((((((((....(((..(((......))).(((((((((((((((....))))))))))))))))))..)))))))))))))...........	....(((((.....)))))......((((((((((.........(((......)))..((((((((((((((....))))))))))))))......))))))))))..............	36	32	22	30
235	354	37	-36.8	-3.97	0	17.77	0.0111795	CCATCAGGATGGTCTTGGCGATTCTAGCCTTTTTGAGATTCACGGCAATCAAGCCATCACTGGGTCTCATCAATAGATGGGGTTCAGTGGGGAAAAAAGAGGCTATGGAAATAATAAAGA	.(.((((((...)))))).).(((((((((((((....(((..(((......))).(((((((((((((((....))))))))))))))))))..)))))))))).)))...........	...((((((...))))))......((((((((((.........(((......)))..((((((((((((((....))))))))))))))......))))))))))...............	37	32	21	30
236	355	37	-36.4	-2.66	0	13.27	0.0120996	CATCAGGATGGTCTTGGCGATTCTAGCCTTTTTGAGATTCACGGCAATCAAGCCATCACTGGGTCTCATCAATAGATGGGGTTCAGTGGGGAAAAAAGAGGCTATGGAAATAATAAAGAA	(.((((((...)))))).).(((((((((((((....(((..(((......))).(((((((((((((((....))))))))))))))))))..)))))))))).)))............	..((((((...))))))......((((((((((.........(((......)))..((((((((((((((....))))))))))))))......))))))))))................	38	32	20	30
237	356	37	-35.9	-2.87	0	14.19	0.0105781	ATCAGGATGGTCTTGGCGATTCTAGCCTTTTTGAGATTCACGGCAATCAAGCCATCACTGGGTCTCATCAATAGATGGGGTTCAGTGGGGAAAAAAGAGGCTATGGAAATAATAAAGAAG	.((((((...))))))...(((((((((((((....(((..(((......))).(((((((((((((((....))))))))))))))))))..)))))))))).))).............	..(((((...))))).......((((((((((.........(((......)))..((((((((((((((....))))))))))))))......)))))))))).................	38	33	19	30
238	357	37	-35.8	-2.89	0	14.43	0.00951225	TCAGGATGGTCTTGGCGATTCTAGCCTTTTTGAGATTCACGGCAATCAAGCCATCACTGGGTCTCATCAATAGATGGGGTTCAGTGGGGAAAAAAGAGGCTATGGAAATAATAAAGAAGT	.(((((...)))))....(((((((((((((....(((..(((......))).(((((((((((((((....))))))))))))))))))..)))))))))).)))..............	.(((((...))))).......((((((((((.........(((......)))..((((((((((((((....))))))))))))))......))))))))))..................	37	33	19	31
239	358	37	-35.6	-2.47	0.01	16.49	0.0127048	CAGGATGGTCTTGGCGATTCTAGCCTTTTTGAGATTCACGGCAATCAAGCCATCACTGGGTCTCATCAATAGATGGGGTTCAGTGGGGAAAAAAGAGGCTATGGAAATAATAAAGAAGTT	(((((...)))))....(((((((((((((....(((..(((......))).(((((((((((((((....))))))))))))))))))..)))))))))).)))...............	((((.....)))).......((((((((((.........(((......)))..((((((((((((((....))))))))))))))......))))))))))...................	37	33	19	31
240	359	37	-35.6	-2.88	0	16.1	0.00789862	AGGATGGTCTTGGCGATTCTAGCCTTTTTGAGATTCACGGCAATCAAGCCATCACTGGGTCTCATCAATAGATGGGGTTCAGTGGGGAAAAAAGAGGCTATGGAAATAATAAAGAAGTTC	.((((..((((.....(((((((((((((....(((..(((......))).(((((((((((((((....))))))))))))))))))..)))))))))).))).......)))).))))	.((((..((((......((.(((((((((.........(((......)))..((((((((((((((....))))))))))))))......)))))))))...)).......)))).))))	37	33	19	31
241	360	37	-37.1	-3.75	0	12.95	0.011128	GGATGGTCTTGGCGATTCTAGCCTTTTTGAGATTCACGGCAATCAAGCCATCACTGGGTCTCATCAATAGATGGGGTTCAGTGGGGAAAAAAGAGGCTATGGAAATAATAAAGAAGTTCA	((((..((((.....(((((((((((((....(((..(((......))).(((((((((((((((....))))))))))))))))))..)))))))))).))).......)))).)))).	((((..((((......((.(((((((((.........(((......)))..((((((((((((((....))))))))))))))......)))))))))...)).......)))).)))).	37	33	19	31
242	361	37	-35.9	-3.05	0	12.29	0.0113956	GATGGTCTTGGCGATTCTAGCCTTTTTGAGATTCACGGCAATCAAGCCATCACTGGGTCTCATCAATAGATGGGGTTCAGTGGGGAAAAAAGAGGCTATGGAAATAATAAAGAAGTTCAA	((...((((.....(((((((((((((....(((..(((......))).(((((((((((((((....))))))))))))))))))..)))))))))).))).......))))...))..	((...((((......((.(((((((((.........(((......)))..((((((((((((((....))))))))))))))......)))))))))...)).......))))...))..	38	32	19	31
243	362	37	-34.1	-2.85	0	15.59	0.00607719	ATGGTCTTGGCGATTCTAGCCTTTTTGAGATTCACGGCAATCAAGCCATCACTGGGTCTCATCAATAGATGGGGTTCAGTGGGGAAAAAAGAGGCTATGGAAATAATAAAGAAGTTCAAG	....((((.....(((((((((((((....(((..(((......))).(((((((((((((((....))))))))))))))))))..)))))))))).))).......))))........	....((((......((((((((((((.........(((......)))..((((((((((((((....))))))))))))))......))))))))))..)).......))))........	38	32	19	31
244	363	37	-35.3	-2.9	0	16.1	0.010475	TGGTCTTGGCGATTCTAGCCTTTTTGAGATTCACGGCAATCAAGCCATCACTGGGTCTCATCAATAGATGGGGTTCAGTGGGGAAAAAAGAGGCTATGGAAATAATAAAGAAGTTCAAGA	...((((((...(((((((((((((....(((..(((......))).(((((((((((((((....))))))))))))))))))..))))))))).............))))..))))))	...((((((.......(((((((((.........(((......)))..((((((((((((((....))))))))))))))......)))))))))...................))))))	38	32	19	31
245	364	37	-35.9	-3.11	0	13.87	0.0146949	GGTCTTGGCGATTCTAGCCTTTTTGAGATTCACGGCAATCAAGCCATCACTGGGTCTCATCAATAGATGGGGTTCAGTGGGGAAAAAAGAGGCTATGGAAATAATAAAGAAGTTCAAGAA	..((((((...(((((((((((((....(((..(((......))).(((((((((((((((....))))))))))))))))))..))))))))).............))))..)))))).	..((((((....((.(((((((((.........(((......)))..((((((((((((((....))))))))))))))......)))))))))..............))...)))))).	39	32	19	30
246	365	37	-35.9	-3.51	0	13.68	0.0148261	GTCTTGGCGATTCTAGCCTTTTTGAGATTCACGGCAATCAAGCCATCACTGGGTCTCATCAATAGATGGGGTTCAGTGGGGAAAAAAGAGGCTATGGAAATAATAAAGAAGTTCAAGAAA	.((((((...(((((((((((((....(((..(((......))).(((((((((((((((....))))))))))))))))))..))))))))).............))))..))))))..	.((((((...(((.(((((((((.........(((......)))..((((((((((((((....))))))))))))))......)))))))))..............)))..))))))..	40	31	19	30
247	366	37	-35.9	-3.24	0	13.66	0.0148495	TCTTGGCGATTCTAGCCTTTTTGAGATTCACGGCAATCAAGCCATCACTGGGTCTCATCAATAGATGGGGTTCAGTGGGGAAAAAAGAGGCTATGGAAATAATAAAGAAGTTCAAGAAAG	((((((...(((((((((((((....(((..(((......))).(((((((((((((((....))))))))))))))))))..))))))))).............))))..))))))...	((((((...(((.(((((((((.........(((......)))..((((((((((((((....))))))))))))))......)))))))))..............)))..))))))...	40	31	19	30
248	367	37	-34.3	-3.43	0	14.27	0.0151204	CTTGGCGATTCTAGCCTTTTTGAGATTCACGGCAATCAAGCCATCACTGGGTCTCATCAATAGATGGGGTTCAGTGGGGAAAAAAGAGGCTATGGAAATAATAAAGAAGTTCAAGAAAGA	(((((...(((((((((((((....(((..(((......))).(((((((((((((((....))))))))))))))))))..))))))))).............))))..))))).....	(((((.......(((((((((.........(((......)))..((((((((((((((....))))))))))))))......)))))))))...................))))).....	41	31	19	29
249	368	37	-33	-2.75	0	14.37	0.0169587	TTGGCGATTCTAGCCTTTTTGAGATTCACGGCAATCAAGCCATCACTGGGTCTCATCAATAGATGGGGTTCAGTGGGGAAAAAAGAGGCTATGGAAATAATAAAGAAGTTCAAGAAAGAT	.......(((((((((((((....(((..(((......))).(((((((((((((((....))))))))))))))))))..)))))))))).))).........................	..........((((((((((.........(((......)))..((((((((((((((....))))))))))))))......)))))))))).............................	41	31	18	30
250	369	37	-33	-3.37	0	13.59	0.0201334	TGGCGATTCTAGCCTTTTTGAGATTCACGGCAATCAAGCCATCACTGGGTCTCATCAATAGATGGGGTTCAGTGGGGAAAAAAGAGGCTATGGAAATAATAAAGAAGTTCAAGAAAGATC	......(((((((((((((....(((..(((......))).(((((((((((((((....))))))))))))))))))..)))))))))).)))..........................	.........((((((((((.........(((......)))..((((((((((((((....))))))))))))))......))))))))))..............................	41	31	19	29
251	370	37	-33	-2.64	0.01	14.69	0.0112609	GGCGATTCTAGCCTTTTTGAGATTCACGGCAATCAAGCCATCACTGGGTCTCATCAATAGATGGGGTTCAGTGGGGAAAAAAGAGGCTATGGAAATAATAAAGAAGTTCAAGAAAGATCT	.....(((((((((((((....(((..(((......))).(((((((((((((((....))))))))))))))))))..)))))))))).)))...........................	........((((((((((.........(((......)))..((((((((((((((....))))))))))))))......))))))))))...............................	41	31	19	29
252	371	37	-33.4	-3.28	0	14.25	0.0108325	GCGATTCTAGCCTTTTTGAGATTCACGGCAATCAAGCCATCACTGGGTCTCATCAATAGATGGGGTTCAGTGGGGAAAAAAGAGGCTATGGAAATAATAAAGAAGTTCAAGAAAGATCTG	....(((((((((((((....(((..(((......))).(((((((((((((((....))))))))))))))))))..)))))))))).)))...........((.((......)).)).	......(((((((((((.........(((......)))..((((((((((((((....))))))))))))))......)))))))))).)..............................	41	31	19	29
253	372	37	-33.4	-2.43	0.01	14.66	0.00946996	CGATTCTAGCCTTTTTGAGATTCACGGCAATCAAGCCATCACTGGGTCTCATCAATAGATGGGGTTCAGTGGGGAAAAAAGAGGCTATGGAAATAATAAAGAAGTTCAAGAAAGATCTGG	...(((((((((((((....(((..(((......))).(((((((((((((((....))))))))))))))))))..)))))))))).)))...........((.((......)).))..	.....(((((((((((.........(((......)))..((((((((((((((....))))))))))))))......)))))))))).)...............................	41	31	19	29
254	373	37	-33.4	-2.46	0	14.99	0.00845264	GATTCTAGCCTTTTTGAGATTCACGGCAATCAAGCCATCACTGGGTCTCATCAATAGATGGGGTTCAGTGGGGAAAAAAGAGGCTATGGAAATAATAAAGAAGTTCAAGAAAGATCTGGC	..(((((((((((((....(((..(((......))).(((((((((((((((....))))))))))))))))))..)))))))))).)))...........((.((......)).))...	....(((((((((((.........(((......)))..((((((((((((((....))))))))))))))......)))))))))).)................................	41	31	19	29
255	374	37	-33.4	-2.89	0	16.06	0.00410595	ATTCTAGCCTTTTTGAGATTCACGGCAATCAAGCCATCACTGGGTCTCATCAATAGATGGGGTTCAGTGGGGAAAAAAGAGGCTATGGAAATAATAAAGAAGTTCAAGAAAGATCTGGCT	.(((((((((((((....(((..(((......))).(((((((((((((((....))))))))))))))))))..)))))))))).)))...........((.((......)).))....	..((((((((((((.........(((......)))..((((((((((((((....))))))))))))))......)))))))))).))...................((....)).....	41	30	19	30
256	375	37	-34.1	-3.06	0	15.68	0.00581473	TTCTAGCCTTTTTGAGATTCACGGCAATCAAGCCATCACTGGGTCTCATCAATAGATGGGGTTCAGTGGGGAAAAAAGAGGCTATGGAAATAATAAAGAAGTTCAAGAAAGATCTGGCTG	(((((((((((((....(((..(((......))).(((((((((((((((....))))))))))))))))))..)))))))))).)))...........((((..(((....))))))).	.((((((((((((.........(((......)))..((((((((((((((....))))))))))))))......)))))))))).))............(((...(((....))).))).	40	31	19	30
257	376	37	-33	-2.96	0	15.3	0.00364957	TCTAGCCTTTTTGAGATTCACGGCAATCAAGCCATCACTGGGTCTCATCAATAGATGGGGTTCAGTGGGGAAAAAAGAGGCTATGGAAATAATAAAGAAGTTCAAGAAAGATCTGGCTGC	..((((((((((....(((..(((......))).(((((((((((((((....))))))))))))))))))..))))))))))...............((((..(((....)))))))..	..((((((((((.........(((......)))..((((((((((((((....))))))))))))))......))))))))))...............(((...(((....))).)))..	40	31	20	29
258	377	37	-33	-2.65	0	14.44	0.00637908	CTAGCCTTTTTGAGATTCACGGCAATCAAGCCATCACTGGGTCTCATCAATAGATGGGGTTCAGTGGGGAAAAAAGAGGCTATGGAAATAATAAAGAAGTTCAAGAAAGATCTGGCTGCC	.((((((((((....(((..(((......))).(((((((((((((((....))))))))))))))))))..))))))))))...............((((..(((....)))))))...	.((((((((((.........(((......)))..((((((((((((((....))))))))))))))......))))))))))...............(((...(((....))).)))...	40	31	21	28
259	378	37	-32.8	-2.85	0.01	15.5	0.00599148	TAGCCTTTTTGAGATTCACGGCAATCAAGCCATCACTGGGTCTCATCAATAGATGGGGTTCAGTGGGGAAAAAAGAGGCTATGGAAATAATAAAGAAGTTCAAGAAAGATCTGGCTGCCA	((((((((((....(((..(((......))).(((((((((((((((....))))))))))))))))))..))))))))))...............((((..(((....)))))))....	((((((((((.........(((......)))..((((((((((((((....))))))))))))))......))))))))))...............((.....((....))...))....	41	31	20	28
260	379	37	-31.6	-2.74	0	17.18	0.00383779	AGCCTTTTTGAGATTCACGGCAATCAAGCCATCACTGGGTCTCATCAATAGATGGGGTTCAGTGGGGAAAAAAGAGGCTATGGAAATAATAAAGAAGTTCAAGAAAGATCTGGCTGCCAT	(((((((((....(((..(((......))).(((((((((((((((....))))))))))))))))))..)))))))))................((((..(((....))))))).....	(((((((((.........(((......)))..((((((((((((((....))))))))))))))......))))))))).......................(......)..........	41	31	20	28
261	380	37	-31.3	-2.4	0	16.29	0.00538752	GCCTTTTTGAGATTCACGGCAATCAAGCCATCACTGGGTCTCATCAATAGATGGGGTTCAGTGGGGAAAAAAGAGGCTATGGAAATAATAAAGAAGTTCAAGAAAGATCTGGCTGCCATG	((((((((....(((..(((......))).(((((((((((((((....))))))))))))))))))..))))))))(((((............((.((......)).)).....)))))	((((((((.........(((......)))..((((((((((((((....))))))))))))))......)))))))).((((.................................)))).	40	32	20	28
262	381	37	-27.8	-1.25	0.09	30.05	0.00247699	CCTTTTTGAGATTCACGGCAATCAAGCCATCACTGGGTCTCATCAATAGATGGGGTTCAGTGGGGAAAAAAGAGGCTATGGAAATAATAAAGAAGTTCAAGAAAGATCTGGCTGCCATGC	.((((...(..((((.(((.......((.(((((((((((((((....))))))))))))))))).........))).))))..)...)))).((((..(((....))))))).......	................(((......))).(((((((((((((((....))))))))))))))).........................................................	40	31	21	28
263	382	37	-29.2	-1.57	0.05	24.8	0.00978177	CTTTTTGAGATTCACGGCAATCAAGCCATCACTGGGTCTCATCAATAGATGGGGTTCAGTGGGGAAAAAAGAGGCTATGGAAATAATAAAGAAGTTCAAGAAAGATCTGGCTGCCATGCT	.((((((((.(((..(((......))).(((((((((((((((....)))))))))))))))............................))).))))))))......(((......)))	....((((...((..(((......))).(((((((((((((((....)))))))))))))))............................))...)))).........(((......)))	40	31	20	29
264	383	37	-29.6	-1.77	0.05	23.04	0.0171599	TTTTTGAGATTCACGGCAATCAAGCCATCACTGGGTCTCATCAATAGATGGGGTTCAGTGGGGAAAAAAGAGGCTATGGAAATAATAAAGAAGTTCAAGAAAGATCTGGCTGCCATGCTG	((((((((.(((..(((......))).(((((((((((((((....)))))))))))))))............................))).))))))))......(((......))).	.((((((...((...............(((((((((((((((....)))))))))))))))............................))...)))))).......(((......))).	40	32	19	29
265	384	37	-28.9	-1.46	0.07	23.31	0.00570098	TTTTGAGATTCACGGCAATCAAGCCATCACTGGGTCTCATCAATAGATGGGGTTCAGTGGGGAAAAAAGAGGCTATGGAAATAATAAAGAAGTTCAAGAAAGATCTGGCTGCCATGCTGA	............(((((....((((.(((((((((((((((....)))))))))))))))..............................((.((......)).))))))....))))).	............(((((....((((.(((((((((((((((....)))))))))))))))..............................................))))....))))).	41	32	19	28
266	385	37	-28.9	-1.93	0.01	19.27	0.00683303	TTTGAGATTCACGGCAATCAAGCCATCACTGGGTCTCATCAATAGATGGGGTTCAGTGGGGAAAAAAGAGGCTATGGAAATAATAAAGAAGTTCAAGAAAGATCTGGCTGCCATGCTGAG	...........(((((....((((.(((((((((((((((....)))))))))))))))..............................((.((......)).))))))....)))))..	...........(((((....((((.(((((((((((((((....)))))))))))))))..............................................))))....)))))..	41	33	19	27
267	386	37	-29	-1.86	0.03	18.3	0.00391236	TTGAGATTCACGGCAATCAAGCCATCACTGGGTCTCATCAATAGATGGGGTTCAGTGGGGAAAAAAGAGGCTATGGAAATAATAAAGAAGTTCAAGAAAGATCTGGCTGCCATGCTGAGA	.......((.(((((....((((.(((((((((((((((....)))))))))))))))..............................((.((......)).))))))....))))).))	..........(((((....((((.(((((((((((((((....)))))))))))))))..............................................))))....)))))...	42	33	19	26
268	387	37	-30	-2.71	0.01	14.8	0.00536732	TGAGATTCACGGCAATCAAGCCATCACTGGGTCTCATCAATAGATGGGGTTCAGTGGGGAAAAAAGAGGCTATGGAAATAATAAAGAAGTTCAAGAAAGATCTGGCTGCCATGCTGAGAA	.....(((.(((((....((((.(((((((((((((((....)))))))))))))))..............................((.((......)).))))))....))))).)))	......((.(((((....((((.(((((((((((((((....)))))))))))))))..............................................))))....))))).)).	43	33	19	25
269	388	37	-31.2	-2.36	0.01	13.49	0.00803138	GAGATTCACGGCAATCAAGCCATCACTGGGTCTCATCAATAGATGGGGTTCAGTGGGGAAAAAAGAGGCTATGGAAATAATAAAGAAGTTCAAGAAAGATCTGGCTGCCATGCTGAGAAT	...((((.(((((....((((.(((((((((((((((....)))))))))))))))..............................((.((......)).))))))....))))).))))	...((((.(((((....((((.(((((((((((((((....)))))))))))))))..............................................))))....))))).))))	43	33	19	25
270	389	37	-31.9	-3.14	0	12.96	0.00988558	AGATTCACGGCAATCAAGCCATCACTGGGTCTCATCAATAGATGGGGTTCAGTGGGGAAAAAAGAGGCTATGGAAATAATAAAGAAGTTCAAGAAAGATCTGGCTGCCATGCTGAGAATA	..((((.(((((....((((.(((((((((((((((....)))))))))))))))..............................((.((......)).))))))....))))).)))).	..((((.(((((....((((.(((((((((((((((....)))))))))))))))..............................................))))....))))).)))).	44	32	19	25
271	390	37	-31.9	-3.13	0	12.95	0.00989871	GATTCACGGCAATCAAGCCATCACTGGGTCTCATCAATAGATGGGGTTCAGTGGGGAAAAAAGAGGCTATGGAAATAATAAAGAAGTTCAAGAAAGATCTGGCTGCCATGCTGAGAATAA	.((((.(((((....((((.(((((((((((((((....)))))))))))))))..............................((.((......)).))))))....))))).))))..	.((((.(((((....((((.(((((((((((((((....)))))))))))))))..............................................))))....))))).))))..	44	32	19	25
272	391	37	-31.5	-3.24	0	13.2	0.00902005	ATTCACGGCAATCAAGCCATCACTGGGTCTCATCAATAGATGGGGTTCAGTGGGGAAAAAAGAGGCTATGGAAATAATAAAGAAGTTCAAGAAAGATCTGGCTGCCATGCTGAGAATAAT	((((.(((((....((((.(((((((((((((((....)))))))))))))))..............................((.((......)).))))))....))))).))))...	((((.(((((....((((.(((((((((((((((....)))))))))))))))..............................................))))....))))).))))...	44	31	19	26
273	392	37	-30.3	-2.15	0.01	14.24	0.00677968	TTCACGGCAATCAAGCCATCACTGGGTCTCATCAATAGATGGGGTTCAGTGGGGAAAAAAGAGGCTATGGAAATAATAAAGAAGTTCAAGAAAGATCTGGCTGCCATGCTGAGAATAATC	(((.(((((....((((.(((((((((((((((....)))))))))))))))..............................((.((......)).))))))....))))).))).....	(((.(((((....((((.(((((((((((((((....)))))))))))))))..............................................))))....))))).))).....	43	31	20	26
274	393	37	-29.6	-2.49	0.01	14.84	0.00704978	TCACGGCAATCAAGCCATCACTGGGTCTCATCAATAGATGGGGTTCAGTGGGGAAAAAAGAGGCTATGGAAATAATAAAGAAGTTCAAGAAAGATCTGGCTGCCATGCTGAGAATAATCA	((.(((((....((((.(((((((((((((((....)))))))))))))))..............................((.((......)).))))))....))))).)).......	((.(((((....((((.(((((((((((((((....)))))))))))))))..............................................))))....))))).)).......	44	31	20	25
275	394	37	-28.9	-2.1	0	16.63	0.00710638	CACGGCAATCAAGCCATCACTGGGTCTCATCAATAGATGGGGTTCAGTGGGGAAAAAAGAGGCTATGGAAATAATAAAGAAGTTCAAGAAAGATCTGGCTGCCATGCTGAGAATAATCAA	..(((((....((((.(((((((((((((((....)))))))))))))))..............................((.((......)).))))))....)))))...........	..(((((....((((.(((((((((((((((....)))))))))))))))..............................................))))....)))))...........	45	31	20	24
276	395	37	-28.9	-2.22	0	15.67	0.00874742	ACGGCAATCAAGCCATCACTGGGTCTCATCAATAGATGGGGTTCAGTGGGGAAAAAAGAGGCTATGGAAATAATAAAGAAGTTCAAGAAAGATCTGGCTGCCATGCTGAGAATAATCAAT	.(((((....((((.(((((((((((((((....)))))))))))))))..............................((.((......)).))))))....)))))............	.(((((....((((.(((((((((((((((....)))))))))))))))..............................................))))....)))))............	45	31	19	25
277	396	37	-28.9	-2.36	0.03	15.68	0.00871162	CGGCAATCAAGCCATCACTGGGTCTCATCAATAGATGGGGTTCAGTGGGGAAAAAAGAGGCTATGGAAATAATAAAGAAGTTCAAGAAAGATCTGGCTGCCATGCTGAGAATAATCAATG	(((((....((((.(((((((((((((((....)))))))))))))))..............................((.((......)).))))))....))))).............	(((((....((((.(((((((((((((((....)))))))))))))))..............................................))))....))))).............	44	32	19	25
278	397	37	-27	-1.51	0.03	25.24	0.0020488	GGCAATCAAGCCATCACTGGGTCTCATCAATAGATGGGGTTCAGTGGGGAAAAAAGAGGCTATGGAAATAATAAAGAAGTTCAAGAAAGATCTGGCTGCCATGCTGAGAATAATCAATGC	(((......))).(((((((((((((((....)))))))))))))))..........(((.((((............((.((......)).)).....)))))))...............	.............(((((((((((((((....)))))))))))))))..........................................................((......)).....	44	32	19	25
279	398	37	-26.3	-1.74	0.03	24.33	0.00330186	GCAATCAAGCCATCACTGGGTCTCATCAATAGATGGGGTTCAGTGGGGAAAAAAGAGGCTATGGAAATAATAAAGAAGTTCAAGAAAGATCTGGCTGCCATGCTGAGAATAATCAATGCT	(((....((((.(((((((((((((((....)))))))))))))))..............................((.((......)).))))))....)))(((......))).....	............(((((((((((((((....)))))))))))))))..........................................................((......))......	44	31	19	26
280	399	37	-25.4	-1.72	0.07	24.19	0.00544559	CAATCAAGCCATCACTGGGTCTCATCAATAGATGGGGTTCAGTGGGGAAAAAAGAGGCTATGGAAATAATAAAGAAGTTCAAGAAAGATCTGGCTGCCATGCTGAGAATAATCAATGCTA	....((((((.(((((((((((((((....)))))))))))))))..........)))).)).............(((....((....((((((......))).)))....))...))).	........((.(((((((((((((((....))))))))))))))))).........................................................................	45	30	19	26
281	400	37	-25.4	-1.6	0.05	24.33	0.00530652	AATCAAGCCATCACTGGGTCTCATCAATAGATGGGGTTCAGTGGGGAAAAAAGAGGCTATGGAAATAATAAAGAAGTTCAAGAAAGATCTGGCTGCCATGCTGAGAATAATCAATGCTAG	...((((((.(((((((((((((((....)))))))))))))))..........)))).)).............(((....((....((((((......))).)))....))...)))..	.......((.(((((((((((((((....)))))))))))))))))..........................................................................	45	31	18	26
282	401	37	-25.4	-1.35	0.05	25.35	0.00259159	ATCAAGCCATCACTGGGTCTCATCAATAGATGGGGTTCAGTGGGGAAAAAAGAGGCTATGGAAATAATAAAGAAGTTCAAGAAAGATCTGGCTGCCATGCTGAGAATAATCAATGCTAGG	..((((((.(((((((((((((((....)))))))))))))))..........)))).)).............(((....((....((((((......))).)))....))...)))...	.........(((((((((((((((....)))))))))))))))..........................................................((......)).........	44	32	18	26
283	402	37	-26.1	-1.8	0.03	23.65	0.00336506	TCAAGCCATCACTGGGTCTCATCAATAGATGGGGTTCAGTGGGGAAAAAAGAGGCTATGGAAATAATAAAGAAGTTCAAGAAAGATCTGGCTGCCATGCTGAGAATAATCAATGCTAGGA	...((((.(((((((((((((((....)))))))))))))))..............................((.((......)).)))))).((..(((((......)))..))..)).	........(((((((((((((((....)))))))))))))))...................................................((..(((((......)))..))..)).	44	32	18	26
284	403	37	-26.1	-1.83	0.05	22.03	0.00413452	CAAGCCATCACTGGGTCTCATCAATAGATGGGGTTCAGTGGGGAAAAAAGAGGCTATGGAAATAATAAAGAAGTTCAAGAAAGATCTGGCTGCCATGCTGAGAATAATCAATGCTAGGAA	..((((.(((((((((((((((....)))))))))))))))..............................((.((......)).)))))).((..(((((......)))..))..))..	..((((.(((((((((((((((....)))))))))))))))..............................................)))).((..(((((......)))..))..))..	45	32	18	25
285	404	37	-26.1	-2.1	0.01	21.32	0.00460027	AAGCCATCACTGGGTCTCATCAATAGATGGGGTTCAGTGGGGAAAAAAGAGGCTATGGAAATAATAAAGAAGTTCAAGAAAGATCTGGCTGCCATGCTGAGAATAATCAATGCTAGGAAG	.((((.(((((((((((((((....)))))))))))))))..............................((.((......)).)))))).((..(((((......)))..))..))...	.((((.(((((((((((((((....)))))))))))))))..............................................)))).((..(((((......)))..))..))...	45	33	17	25
286	405	37	-25.7	-1.54	0.07	22.49	0.00291105	AGCCATCACTGGGTCTCATCAATAGATGGGGTTCAGTGGGGAAAAAAGAGGCTATGGAAATAATAAAGAAGTTCAAGAAAGATCTGGCTGCCATGCTGAGAATAATCAATGCTAGGAAGG	((((.(((((((((((((((....)))))))))))))))..............................((.((......)).)))))).((..(((((......)))..))..))....	.....(((((((((((((((....)))))))))))))))...................................................((..(((((......)))..))..))....	44	34	17	25
287	406	37	-25.6	-2.05	0.01	22.59	0.00375172	GCCATCACTGGGTCTCATCAATAGATGGGGTTCAGTGGGGAAAAAAGAGGCTATGGAAATAATAAAGAAGTTCAAGAAAGATCTGGCTGCCATGCTGAGAATAATCAATGCTAGGAAGGA	.((.(((((((((((((((....)))))))))))))))))............................((.((......)).))..((.((..(((((......)))..))..)).))..	.((.(((((((((((((((....))))))))))))))))).....................................................(((((......)))..)).........	44	34	17	25
288	407	37	-25.4	-1.74	0.03	22.14	0.003979	CCATCACTGGGTCTCATCAATAGATGGGGTTCAGTGGGGAAAAAAGAGGCTATGGAAATAATAAAGAAGTTCAAGAAAGATCTGGCTGCCATGCTGAGAATAATCAATGCTAGGAAGGAG	((.(((((((((((((((....)))))))))))))))))............................((.((......)).))..((.((..(((((......)))..))..)).))...	((.(((((((((((((((....))))))))))))))))).....................................................(((((......)))..))..........	44	34	17	25
289	408	37	-23.4	-1.26	0.03	22.26	0.00293308	CATCACTGGGTCTCATCAATAGATGGGGTTCAGTGGGGAAAAAAGAGGCTATGGAAATAATAAAGAAGTTCAAGAAAGATCTGGCTGCCATGCTGAGAATAATCAATGCTAGGAAGGAGA	..(((((((((((((((....)))))))))))))))...........................................(((..((.((..(((((......)))..))..)).)).)))	..(((((((((((((((....))))))))))))))).......................................................(((((......)))..))...........	45	34	16	25
290	409	37	-23.9	-1.95	0.03	21.07	0.0100315	ATCACTGGGTCTCATCAATAGATGGGGTTCAGTGGGGAAAAAAGAGGCTATGGAAATAATAAAGAAGTTCAAGAAAGATCTGGCTGCCATGCTGAGAATAATCAATGCTAGGAAGGAGAA	.(((((((((((((((....)))))))))))))))...........................................(((..((.((..(((((......)))..))..)).)).))).	.(((((((((((((((....)))))))))))))))...................................................((..(((((......)))..))..))........	46	34	15	25
291	410	37	-24.1	-1.75	0.05	21.03	0.0114565	TCACTGGGTCTCATCAATAGATGGGGTTCAGTGGGGAAAAAAGAGGCTATGGAAATAATAAAGAAGTTCAAGAAAGATCTGGCTGCCATGCTGAGAATAATCAATGCTAGGAAGGAGAAG	(((((((((((((((....)))))))))))))))...........................................(((..((.((..(((((......)))..))..)).)).)))..	(((((((((((((((....)))))))))))))))...................................................((..(((((......)))..))..)).........	45	35	15	25
292	411	37	-23.6	-1.87	0.01	20.47	0.015252	CACTGGGTCTCATCAATAGATGGGGTTCAGTGGGGAAAAAAGAGGCTATGGAAATAATAAAGAAGTTCAAGAAAGATCTGGCTGCCATGCTGAGAATAATCAATGCTAGGAAGGAGAAGA	((((((((((((((....))))))))))))))............................................(((..((.((..(((((......)))..))..)).)).)))...	((((((((((((((....))))))))))))))....................................................((..(((((......)))..))..))..........	46	35	15	24
293	412	37	-20.4	-1.13	0.11	21.8	0.0110643	ACTGGGTCTCATCAATAGATGGGGTTCAGTGGGGAAAAAAGAGGCTATGGAAATAATAAAGAAGTTCAAGAAAGATCTGGCTGCCATGCTGAGAATAATCAATGCTAGGAAGGAGAAGAA	(((((((((((((....))))))))))))).............................................(((..((.((..(((((......)))..))..)).)).)))....	(((((((((((((....))))))))))))).....................................................((..(((((......)))..))..))...........	47	35	14	24
294	413	37	-18.6	-0.51	0.23	28.96	0.00755089	CTGGGTCTCATCAATAGATGGGGTTCAGTGGGGAAAAAAGAGGCTATGGAAATAATAAAGAAGTTCAAGAAAGATCTGGCTGCCATGCTGAGAATAATCAATGCTAGGAAGGAGAAGAAG	((((((((((((....))))))))))))..............................................(((..((.((..(((((......)))..))..)).)).))).....	((((((((((((....))))))))))))............................................................................................	46	36	14	24
295	414	37	-16.9	-0.3	0.39	30.49	0.00484462	TGGGTCTCATCAATAGATGGGGTTCAGTGGGGAAAAAAGAGGCTATGGAAATAATAAAGAAGTTCAAGAAAGATCTGGCTGCCATGCTGAGAATAATCAATGCTAGGAAGGAGAAGAAGA	....(((((((....)))))))((((((..((.....(((..((.((((.............)))))).....))).....))..)))))).............................	....(((((((....))))))).(((((.........(((.................................))).........)))))..............................	47	36	13	24
296	415	37	-16.9	-0.38	0.35	28.46	0.00603717	GGGTCTCATCAATAGATGGGGTTCAGTGGGGAAAAAAGAGGCTATGGAAATAATAAAGAAGTTCAAGAAAGATCTGGCTGCCATGCTGAGAATAATCAATGCTAGGAAGGAGAAGAAGAG	...(((((((....)))))))((((((..((.....(((..((.((((.............)))))).....))).....))..))))))..............................	....((((((....))))))..(((((..((.....(((.................................))).....))..)))))...............................	47	37	13	23
297	416	37	-16.9	-0.68	0.25	24.65	0.007307	GGTCTCATCAATAGATGGGGTTCAGTGGGGAAAAAAGAGGCTATGGAAATAATAAAGAAGTTCAAGAAAGATCTGGCTGCCATGCTGAGAATAATCAATGCTAGGAAGGAGAAGAAGAGA	..(((((((....)))))))((((((..((.....(((..((.((((.............)))))).....))).....))..))))))...............................	...((((((....)))))).((((((..((.....(((.................................))).....))..))))))...............................	48	36	13	23
298	417	37	-16.9	-0.53	0.27	28.09	0.0048606	GTCTCATCAATAGATGGGGTTCAGTGGGGAAAAAAGAGGCTATGGAAATAATAAAGAAGTTCAAGAAAGATCTGGCTGCCATGCTGAGAATAATCAATGCTAGGAAGGAGAAGAAGAGAC	.(((((((....)))))))((((((..((.....(((..((.((((.............)))))).....))).....))..))))))................................	...................((((((..((.....(((.................................))).....))..))))))................................	48	35	14	23
299	418	37	-16.9	-0.34	0.25	25.11	0.00737477	TCTCATCAATAGATGGGGTTCAGTGGGGAAAAAAGAGGCTATGGAAATAATAAAGAAGTTCAAGAAAGATCTGGCTGCCATGCTGAGAATAATCAATGCTAGGAAGGAGAAGAAGAGACG	(((((((....)))))))((((((..((.....(((..((.((((.............)))))).....))).....))..)))))).................................	.((((((....)))))).((((((..((.....(((.................................))).....))..)))))).................................	48	35	14	23
300	419	37	-16.6	-0.77	0.23	21.63	0.0164574	CTCATCAATAGATGGGGTTCAGTGGGGAAAAAAGAGGCTATGGAAATAATAAAGAAGTTCAAGAAAGATCTGGCTGCCATGCTGAGAATAATCAATGCTAGGAAGGAGAAGAAGAGACGA	((((((....)))))).((((((..((.....(((..((.((((.............)))))).....))).....))..))))))..................................	((((((....)))))).((((((..((.....(((.................................))).....))..))))))..................................	49	35	14	22
301	420	37	-13.5	0.343	0.56	23.62	0.00735229	TCATCAATAGATGGGGTTCAGTGGGGAAAAAAGAGGCTATGGAAATAATAAAGAAGTTCAAGAAAGATCTGGCTGCCATGCTGAGAATAATCAATGCTAGGAAGGAGAAGAAGAGACGAG	(((((....)))))..((((((..((.....(((..((.((((.............)))))).....))).....))..))))))...................................	.((((....))))...((((((..((.....(((.................................))).....))..))))))...................................	49	36	13	22
302	421	37	-13	0.253	0.58	22.74	0.00922796	CATCAATAGATGGGGTTCAGTGGGGAAAAAAGAGGCTATGGAAATAATAAAGAAGTTCAAGAAAGATCTGGCTGCCATGCTGAGAATAATCAATGCTAGGAAGGAGAAGAAGAGACGAGG	((((....))))...((((((..((.....(((..((.((((.............)))))).....))).....))..))))))....................................	((((....))))...((((((..((.....(((.................................))).....))..))))))....................................	49	37	13	21
303	422	37	-13	0.164	0.47	16.35	0.0182909	ATCAATAGATGGGGTTCAGTGGGGAAAAAAGAGGCTATGGAAATAATAAAGAAGTTCAAGAAAGATCTGGCTGCCATGCTGAGAATAATCAATGCTAGGAAGGAGAAGAAGAGACGAGGC	.......(((....((((((..((.....(((..((.((((.............)))))).....))).....))..))))))....)))..............................	.......(((....((((((..((.....(((.................................))).....))..))))))....)))..............................	49	37	13	21
304	423	37	-14.1	0.18	0.54	13.97	0.0173054	TCAATAGATGGGGTTCAGTGGGGAAAAAAGAGGCTATGGAAATAATAAAGAAGTTCAAGAAAGATCTGGCTGCCATGCTGAGAATAATCAATGCTAGGAAGGAGAAGAAGAGACGAGGCG	......(((....((((((..((.....(((..((.((((.............)))))).....))).....))..))))))....)))...(((..(...............)..))).	......(((....((((((..((.....(((.................................))).....))..))))))....)))...(((.....................))).	48	38	13	21
305	424	37	-14.1	0.382	0.64	13.4	0.0147866	CAATAGATGGGGTTCAGTGGGGAAAAAAGAGGCTATGGAAATAATAAAGAAGTTCAAGAAAGATCTGGCTGCCATGCTGAGAATAATCAATGCTAGGAAGGAGAAGAAGAGACGAGGCGC	.....(((....((((((..((.....(((..((.((((.............)))))).....))).....))..))))))....)))...(((..(...............)..)))..	.....(((....((((((..((.....(((.................................))).....))..))))))....)))...(((..(...............)..)))..	48	38	14	20
306	425	37	-14.1	-0.28	0.35	14.24	0.0141397	AATAGATGGGGTTCAGTGGGGAAAAAAGAGGCTATGGAAATAATAAAGAAGTTCAAGAAAGATCTGGCTGCCATGCTGAGAATAATCAATGCTAGGAAGGAGAAGAAGAGACGAGGCGCA	....(((....((((((..((.....(((..((.((((.............)))))).....))).....))..))))))....)))...(((..(...............)..)))...	....(((....((((((..((.....(((.................................))).....))..))))))....)))...(((.....................)))...	49	38	13	20
307	426	37	-14.1	-0.1	0.31	14.79	0.0142818	ATAGATGGGGTTCAGTGGGGAAAAAAGAGGCTATGGAAATAATAAAGAAGTTCAAGAAAGATCTGGCTGCCATGCTGAGAATAATCAATGCTAGGAAGGAGAAGAAGAGACGAGGCGCAG	...(((....((((((..((.....(((..((.((((.............)))))).....))).....))..))))))....)))...(((..(...............)..)))....	...(((....((((((..((.....(((.................................))).....))..))))))....)))...(((.....................)))....	48	39	13	20
308	427	37	-14.1	0.286	0.6	15.86	0.0145912	TAGATGGGGTTCAGTGGGGAAAAAAGAGGCTATGGAAATAATAAAGAAGTTCAAGAAAGATCTGGCTGCCATGCTGAGAATAATCAATGCTAGGAAGGAGAAGAAGAGACGAGGCGCAGA	..(((....((((((..((.....(((..((.((((.............)))))).....))).....))..))))))....)))...(((..(...............)..))).....	..(((....((((((..((.....(((.................................))).....))..))))))....)))...(((.....................))).....	48	39	13	20
309	428	37	-14.1	-0.09	0.43	19.5	0.0135158	AGATGGGGTTCAGTGGGGAAAAAAGAGGCTATGGAAATAATAAAGAAGTTCAAGAAAGATCTGGCTGCCATGCTGAGAATAATCAATGCTAGGAAGGAGAAGAAGAGACGAGGCGCAGAT	.(((....((((((..((.....(((..((.((((.............)))))).....))).....))..))))))....)))...(((..(...............)..)))......	.(((....((((((..((.....(((.................................))).....))..))))))....)))...(((.....................)))......	48	39	13	20
310	429	37	-14.3	-0.06	0.45	22.06	0.0124408	GATGGGGTTCAGTGGGGAAAAAAGAGGCTATGGAAATAATAAAGAAGTTCAAGAAAGATCTGGCTGCCATGCTGAGAATAATCAATGCTAGGAAGGAGAAGAAGAGACGAGGCGCAGATA	(((....((((((..((.....(((..((.((((.............)))))).....))).....))..))))))....)))...(((..(...............)..))).......	(((....((((((..((.....(((.................................))).....))..))))))....)))...(((.....................))).......	48	39	13	20
311	430	37	-12.9	0.734	0.7	32.49	0.00548824	ATGGGGTTCAGTGGGGAAAAAAGAGGCTATGGAAATAATAAAGAAGTTCAAGAAAGATCTGGCTGCCATGCTGAGAATAATCAATGCTAGGAAGGAGAAGAAGAGACGAGGCGCAGATAC	......((((((..((.....(((..((.((((.............)))))).....))).....))..))))))....(((..((((..(...............)..))))..)))..	.........................................................(((....(((..........................................)))..)))...	48	38	14	20
312	431	37	-12.9	1.119	0.86	31.16	0.00377987	TGGGGTTCAGTGGGGAAAAAAGAGGCTATGGAAATAATAAAGAAGTTCAAGAAAGATCTGGCTGCCATGCTGAGAATAATCAATGCTAGGAAGGAGAAGAAGAGACGAGGCGCAGATACT	.....((((((..((.....(((..((.((((.............)))))).....))).....))..))))))....(((..((((..(...............)..))))..)))...	.......................................................((((....(((.((((...............................)).)).)))..))))...	47	38	14	21
313	432	37	-13.3	0.463	0.66	28.78	0.00647424	GGGGTTCAGTGGGGAAAAAAGAGGCTATGGAAATAATAAAGAAGTTCAAGAAAGATCTGGCTGCCATGCTGAGAATAATCAATGCTAGGAAGGAGAAGAAGAGACGAGGCGCAGATACTA	....(((.((((............)))).)))....................(((((((.(.(((.((((........((..(......)..)).......)).)).))))))))).)).	.....................................................((((((...(((.((((...............................)).)).))).))))).)..	48	38	14	20
314	433	37	-13.3	0.423	0.62	28.71	0.00833695	GGGTTCAGTGGGGAAAAAAGAGGCTATGGAAATAATAAAGAAGTTCAAGAAAGATCTGGCTGCCATGCTGAGAATAATCAATGCTAGGAAGGAGAAGAAGAGACGAGGCGCAGATACTAG	...(((.((((............)))).)))....................(((((((.(.(((.((((........((..(......)..)).......)).)).))))))))).))..	........(((............)))...........................((((....(((.((((...............................)).)).)))..)))).....	48	38	14	20
315	434	37	-13.3	0.46	0.66	30.61	0.00810518	GGTTCAGTGGGGAAAAAAGAGGCTATGGAAATAATAAAGAAGTTCAAGAAAGATCTGGCTGCCATGCTGAGAATAATCAATGCTAGGAAGGAGAAGAAGAGACGAGGCGCAGATACTAGT	..(((.((((............)))).)))....................(((((((.(.(((.((((........((..(......)..)).......)).)).))))))))).))...	....................................................((((....(((..........................................)))..))))......	48	37	14	21
316	435	37	-13.4	0.837	0.74	30.78	0.00749714	GTTCAGTGGGGAAAAAAGAGGCTATGGAAATAATAAAGAAGTTCAAGAAAGATCTGGCTGCCATGCTGAGAATAATCAATGCTAGGAAGGAGAAGAAGAGACGAGGCGCAGATACTAGTG	.((((((..((.....(((..((.((((.............)))))).....))).....))..))))))..........(((((.............................))))).	..(((((.........(((.................................))).........)))))...................................................	48	37	14	21
317	436	37	-14	0.721	0.72	28.53	0.0102061	TTCAGTGGGGAAAAAAGAGGCTATGGAAATAATAAAGAAGTTCAAGAAAGATCTGGCTGCCATGCTGAGAATAATCAATGCTAGGAAGGAGAAGAAGAGACGAGGCGCAGATACTAGTGT	((((((..((.....(((..((.((((.............)))))).....))).....))..))))))........(((((((.............................)))))))	.(((((..((.....(((.................................))).....))..)))))...........(((((.............................)))))..	48	36	14	22
318	437	37	-13.8	1.129	0.84	30.35	0.00857001	TCAGTGGGGAAAAAAGAGGCTATGGAAATAATAAAGAAGTTCAAGAAAGATCTGGCTGCCATGCTGAGAATAATCAATGCTAGGAAGGAGAAGAAGAGACGAGGCGCAGATACTAGTGTC	(((((..((.....(((..((.((((.............)))))).....))).....))..))))).........(((((((.............................))))))).	(((((..((.....(((.................................))).....))..))))).....................................................	48	36	15	21
319	438	37	-14.2	0.765	0.68	34.78	0.01313	CAGTGGGGAAAAAAGAGGCTATGGAAATAATAAAGAAGTTCAAGAAAGATCTGGCTGCCATGCTGAGAATAATCAATGCTAGGAAGGAGAAGAAGAGACGAGGCGCAGATACTAGTGTCG	((((.(((........((((................)))).........))).))))((..(((((......)))..))..))..................(((((........))))).	........................................................................................................................	48	37	15	20
320	439	37	-13.1	0.78	0.8	28.96	0.00361523	AGTGGGGAAAAAAGAGGCTATGGAAATAATAAAGAAGTTCAAGAAAGATCTGGCTGCCATGCTGAGAATAATCAATGCTAGGAAGGAGAAGAAGAGACGAGGCGCAGATACTAGTGTCGG	.............((.((((((((.............))))......(((((.(.(((.((((........((..(......)..)).......)).)).)))))))))..)))).))..	.............((.(((............................((((....(((.((((...............................)).)).)))..))))...))).))..	48	38	14	20
321	440	37	-13.1	0.48	0.66	25.9	0.00398854	GTGGGGAAAAAAGAGGCTATGGAAATAATAAAGAAGTTCAAGAAAGATCTGGCTGCCATGCTGAGAATAATCAATGCTAGGAAGGAGAAGAAGAGACGAGGCGCAGATACTAGTGTCGGA	............((.((((((((.............))))......(((((.(.(((.((((........((..(......)..)).......)).)).)))))))))..)))).))...	............((.((((...........................(((((...(((.((((...............................)).)).))).)))))..)))).))...	48	38	14	20
322	441	37	-13.1	0.387	0.6	22.95	0.00434865	TGGGGAAAAAAGAGGCTATGGAAATAATAAAGAAGTTCAAGAAAGATCTGGCTGCCATGCTGAGAATAATCAATGCTAGGAAGGAGAAGAAGAGACGAGGCGCAGATACTAGTGTCGGAA	...........((.((((((((.............))))......(((((.(.(((.((((........((..(......)..)).......)).)).)))))))))..)))).))....	...........((.((((...........................(((((...(((.((((........((............)).......)).)).))).)))))..)))).))....	49	37	14	20
323	442	37	-13.1	0.182	0.47	22.98	0.00429858	GGGGAAAAAAGAGGCTATGGAAATAATAAAGAAGTTCAAGAAAGATCTGGCTGCCATGCTGAGAATAATCAATGCTAGGAAGGAGAAGAAGAGACGAGGCGCAGATACTAGTGTCGGAAT	..........((.((((((((.............))))......(((((.(.(((.((((........((..(......)..)).......)).)).)))))))))..)))).)).....	..........((.((((...........................(((((...(((.((((........((............)).......)).)).))).)))))..)))).)).....	49	37	14	20
324	443	37	-13.1	0.666	0.72	24.51	0.00378349	GGGAAAAAAGAGGCTATGGAAATAATAAAGAAGTTCAAGAAAGATCTGGCTGCCATGCTGAGAATAATCAATGCTAGGAAGGAGAAGAAGAGACGAGGCGCAGATACTAGTGTCGGAATT	.........((.((((((((.............))))......(((((.(.(((.((((........((..(......)..)).......)).)).)))))))))..)))).))......	.........((.((((...........................(((((...(((.((((........((............)).......)).)).))).)))))..)))).))......	49	36	14	21
325	444	37	-13.1	0.627	0.72	26.17	0.00309701	GGAAAAAAGAGGCTATGGAAATAATAAAGAAGTTCAAGAAAGATCTGGCTGCCATGCTGAGAATAATCAATGCTAGGAAGGAGAAGAAGAGACGAGGCGCAGATACTAGTGTCGGAATTG	........((.((((((((.............))))......(((((.(.(((.((((........((..(......)..)).......)).)).)))))))))..)))).)).......	........((.(((............................(((((...(((.((((...............................)).)).))).)))))...))).)).......	49	36	14	21
326	445	37	-13.1	0.647	0.68	27.15	0.00299665	GAAAAAAGAGGCTATGGAAATAATAAAGAAGTTCAAGAAAGATCTGGCTGCCATGCTGAGAATAATCAATGCTAGGAAGGAGAAGAAGAGACGAGGCGCAGATACTAGTGTCGGAATTGT	.......((.((((((((.............))))......(((((.(.(((.((((........((..(......)..)).......)).)).)))))))))..)))).))........	.......((.(((............................(((((...(((.((((...............................)).)).))).)))))...))).))........	49	35	14	22
327	446	37	-13.1	0.611	0.76	30.2	0.00272291	AAAAAAGAGGCTATGGAAATAATAAAGAAGTTCAAGAAAGATCTGGCTGCCATGCTGAGAATAATCAATGCTAGGAAGGAGAAGAAGAGACGAGGCGCAGATACTAGTGTCGGAATTGTT	......((.((((((((.............))))......(((((.(.(((.((((........((..(......)..)).......)).)).)))))))))..)))).)).........	......((.(((............................((((....(((.((((...............................)).)).)))..))))...))).)).........	49	34	14	23
328	447	37	-13.1	0.953	0.74	32.74	0.00235952	AAAAAGAGGCTATGGAAATAATAAAGAAGTTCAAGAAAGATCTGGCTGCCATGCTGAGAATAATCAATGCTAGGAAGGAGAAGAAGAGACGAGGCGCAGATACTAGTGTCGGAATTGTTG	.....((.((((((((.............))))......(((((.(.(((.((((........((..(......)..)).......)).)).)))))))))..)))).))..........	.......................................((((....(((.((((...............................)).)).)))..))))...................	48	35	14	23
329	448	37	-13.1	1.114	0.9	33.65	0.00224508	AAAAGAGGCTATGGAAATAATAAAGAAGTTCAAGAAAGATCTGGCTGCCATGCTGAGAATAATCAATGCTAGGAAGGAGAAGAAGAGACGAGGCGCAGATACTAGTGTCGGAATTGTTGG	....((.((((((((.............))))......(((((.(.(((.((((........((..(......)..)).......)).)).)))))))))..)))).))...........	......................................((((....(((.(((.................................).)).)))..))))....................	47	36	14	23
330	449	37	-13.3	1.612	0.92	40.08	0.00158554	AAAGAGGCTATGGAAATAATAAAGAAGTTCAAGAAAGATCTGGCTGCCATGCTGAGAATAATCAATGCTAGGAAGGAGAAGAAGAGACGAGGCGCAGATACTAGTGTCGGAATTGTTGGC	.....(((..((((........................))))...)))..(((((.(((..((.(((((((.............................)))))))..))))).)))))	........................................................................................................................	46	36	15	23
331	450	37	-16.1	1.221	0.82	33.22	0.00223615	AAGAGGCTATGGAAATAATAAAGAAGTTCAAGAAAGATCTGGCTGCCATGCTGAGAATAATCAATGCTAGGAAGGAGAAGAAGAGACGAGGCGCAGATACTAGTGTCGGAATTGTTGGCC	....(((((...............(((((........(((..((.((..(((((......)))..))..)).)).)))........(((.((..........)).))))))))..)))))	....(((((....................................((..((.((......))...))..))............................................)))))	45	36	16	23
332	451	37	-17.9	0.487	0.62	32.93	0.00194093	AGAGGCTATGGAAATAATAAAGAAGTTCAAGAAAGATCTGGCTGCCATGCTGAGAATAATCAATGCTAGGAAGGAGAAGAAGAGACGAGGCGCAGATACTAGTGTCGGAATTGTTGGCCT	..((((((...............(((((........(((..((.((..(((((......)))..))..)).)).)))........(((.((..........)).))))))))..))))))	..((((((....................................((..((.((......))...))..))............................................))))))	44	36	16	24
333	452	37	-20.4	0.16	0.56	32.59	0.00226977	GAGGCTATGGAAATAATAAAGAAGTTCAAGAAAGATCTGGCTGCCATGCTGAGAATAATCAATGCTAGGAAGGAGAAGAAGAGACGAGGCGCAGATACTAGTGTCGGAATTGTTGGCCTC	(((((((...............(((((........(((..((.((..(((((......)))..))..)).)).)))........(((.((..........)).))))))))..)))))))	(((((((....................................((..((.((......))...))..))............................................)))))))	43	36	17	24
334	453	37	-17.6	1.323	0.9	37.17	0.00143535	AGGCTATGGAAATAATAAAGAAGTTCAAGAAAGATCTGGCTGCCATGCTGAGAATAATCAATGCTAGGAAGGAGAAGAAGAGACGAGGCGCAGATACTAGTGTCGGAATTGTTGGCCTCC	((((((...............(((((........(((..((.((..(((((......)))..))..)).)).)))........(((.((..........)).))))))))..))))))..	((((((........................................((.((......))...))................................................))))))..	43	35	18	24
335	454	37	-18.8	0.973	0.84	34.56	0.00302309	GGCTATGGAAATAATAAAGAAGTTCAAGAAAGATCTGGCTGCCATGCTGAGAATAATCAATGCTAGGAAGGAGAAGAAGAGACGAGGCGCAGATACTAGTGTCGGAATTGTTGGCCTCCT	(((.((((............((.((......)).)).....)))))))................((((.((..((.((....(((.((..........)).)))...)).))..))))))	................................................((......))......(((..((..((.((....(((.((..........)).)))...)).))..)).)))	42	35	18	25
336	455	37	-19.4	0.797	0.72	29.18	0.00623927	GCTATGGAAATAATAAAGAAGTTCAAGAAAGATCTGGCTGCCATGCTGAGAATAATCAATGCTAGGAAGGAGAAGAAGAGACGAGGCGCAGATACTAGTGTCGGAATTGTTGGCCTCCTG	((.((((............((.((......)).)).....))))))(((......)))....(((((.((..((.((....(((.((..........)).)))...)).))..)))))))	...((((.................................))))..(((......))).....(((..((..((.((....(((.((..........)).)))...)).))..)).))).	42	35	18	25
337	456	37	-19.7	0.88	0.76	25.51	0.00864404	CTATGGAAATAATAAAGAAGTTCAAGAAAGATCTGGCTGCCATGCTGAGAATAATCAATGCTAGGAAGGAGAAGAAGAGACGAGGCGCAGATACTAGTGTCGGAATTGTTGGCCTCCTGC	...............................((((((......))).))).........((.((((.((..((.((....(((.((..........)).)))...)).))..))))))))	..................................(((......)))................(((..((..((.((....(((.((..........)).)))...)).))..)).)))..	42	34	19	25
338	457	37	-20.9	0.219	0.52	20.82	0.0179348	TATGGAAATAATAAAGAAGTTCAAGAAAGATCTGGCTGCCATGCTGAGAATAATCAATGCTAGGAAGGAGAAGAAGAGACGAGGCGCAGATACTAGTGTCGGAATTGTTGGCCTCCTGCT	..............................((((((......))).))).........((.((((.((..((.((....(((.((..........)).)))...)).))..)))))))).	...............................(.(((......)))..)..........((.(((..((..((.((....(((.((..........)).)))...)).))..)).))))).	42	34	18	26
339	458	37	-20.9	0.291	0.49	19.71	0.0220562	ATGGAAATAATAAAGAAGTTCAAGAAAGATCTGGCTGCCATGCTGAGAATAATCAATGCTAGGAAGGAGAAGAAGAGACGAGGCGCAGATACTAGTGTCGGAATTGTTGGCCTCCTGCTG	.............................((((((......))).))).........((.((((.((..((.((....(((.((..........)).)))...)).))..))))))))..	.............................((((((......))).))).........((.(((..((..((.((....(((.((..........)).)))...)).))..)).)))))..	42	35	18	25
340	459	37	-20.9	0.566	0.68	18.64	0.0160267	TGGAAATAATAAAGAAGTTCAAGAAAGATCTGGCTGCCATGCTGAGAATAATCAATGCTAGGAAGGAGAAGAAGAGACGAGGCGCAGATACTAGTGTCGGAATTGTTGGCCTCCTGCTGA	............................((((((......))).))).........((.((((.((..((.((....(((.((..........)).)))...)).))..))))))))...	............................((((((......))).))).........((.(((..((..((.((....(((.((..........)).)))...)).))..)).)))))...	42	35	18	25
341	460	37	-21	0.559	0.66	18.06	0.0178321	GGAAATAATAAAGAAGTTCAAGAAAGATCTGGCTGCCATGCTGAGAATAATCAATGCTAGGAAGGAGAAGAAGAGACGAGGCGCAGATACTAGTGTCGGAATTGTTGGCCTCCTGCTGAC	...........................((((((......))).)))....(((..((.((((.((..((.((....(((.((..........)).)))...)).))..))))))))))).	...........................((((((......))).))).........((.(((..((..((.((....(((.((..........)).)))...)).))..)).)))))....	42	35	19	24
342	461	37	-21	0.432	0.52	18.47	0.0168631	GAAATAATAAAGAAGTTCAAGAAAGATCTGGCTGCCATGCTGAGAATAATCAATGCTAGGAAGGAGAAGAAGAGACGAGGCGCAGATACTAGTGTCGGAATTGTTGGCCTCCTGCTGACC	..........................((((((......))).)))....(((..((.((((.((..((.((....(((.((..........)).)))...)).))..)))))))))))..	..........................((((((......))).))).........((.(((..((..((.((....(((.((..........)).)))...)).))..)).))))).....	42	34	20	24
343	462	37	-21	0.03	0.47	19.19	0.0173985	AAATAATAAAGAAGTTCAAGAAAGATCTGGCTGCCATGCTGAGAATAATCAATGCTAGGAAGGAGAAGAAGAGACGAGGCGCAGATACTAGTGTCGGAATTGTTGGCCTCCTGCTGACCA	.........................((((((......))).)))....(((..((.((((.((..((.((....(((.((..........)).)))...)).))..)))))))))))...	.........................((((((......))).))).........((.(((..((..((.((....(((.((..........)).)))...)).))..)).)))))......	43	33	20	24
344	463	37	-21	0.603	0.74	19.42	0.0171207	AATAATAAAGAAGTTCAAGAAAGATCTGGCTGCCATGCTGAGAATAATCAATGCTAGGAAGGAGAAGAAGAGACGAGGCGCAGATACTAGTGTCGGAATTGTTGGCCTCCTGCTGACCAC	........................((((((......))).)))....(((..((.((((.((..((.((....(((.((..........)).)))...)).))..)))))))))))....	........................((((((......))).))).........((.(((..((..((.((....(((.((..........)).)))...)).))..)).))))).......	42	33	21	24
345	464	37	-21	0.395	0.56	19.62	0.0160306	ATAATAAAGAAGTTCAAGAAAGATCTGGCTGCCATGCTGAGAATAATCAATGCTAGGAAGGAGAAGAAGAGACGAGGCGCAGATACTAGTGTCGGAATTGTTGGCCTCCTGCTGACCACA	.......................((((((......))).)))....(((..((.((((.((..((.((....(((.((..........)).)))...)).))..))))))))))).....	.......................((((((......))).))).........((.(((..((..((.((....(((.((..........)).)))...)).))..)).)))))........	42	33	21	24
346	465	37	-21	0.925	0.76	20.6	0.014879	TAATAAAGAAGTTCAAGAAAGATCTGGCTGCCATGCTGAGAATAATCAATGCTAGGAAGGAGAAGAAGAGACGAGGCGCAGATACTAGTGTCGGAATTGTTGGCCTCCTGCTGACCACAG	......................((((((......))).)))....(((..((.((((.((..((.((....(((.((..........)).)))...)).))..)))))))))))......	......................((((((......))).))).........((.(((..((..((.((....(((.((..........)).)))...)).))..)).))))).........	41	34	21	24
347	466	37	-22.1	0.671	0.74	32.36	0.0146376	AATAAAGAAGTTCAAGAAAGATCTGGCTGCCATGCTGAGAATAATCAATGCTAGGAAGGAGAAGAAGAGACGAGGCGCAGATACTAGTGTCGGAATTGTTGGCCTCCTGCTGACCACAGC	........(((....((....((((((......))).)))....))...)))((((.((..((.((....(((.((..........)).)))...)).))..))))))((((....))))	.........................((......)).................(((..((..((.((....(((.((..........)).)))...)).))..)).)))((((....))))	41	34	22	23
348	467	37	-23.3	0.551	0.64	33.16	0.0169443	ATAAAGAAGTTCAAGAAAGATCTGGCTGCCATGCTGAGAATAATCAATGCTAGGAAGGAGAAGAAGAGACGAGGCGCAGATACTAGTGTCGGAATTGTTGGCCTCCTGCTGACCACAGCT	.......(((....((....((((((......))).)))....))...)))((((.((..((.((....(((.((..........)).)))...)).))..))))))((((....)))).	...................................................(((..((..((.((....(((.((..........)).)))...)).))..)).)))((((....)))).	40	34	22	24
349	468	37	-23.3	0.254	0.49	34.52	0.0141873	TAAAGAAGTTCAAGAAAGATCTGGCTGCCATGCTGAGAATAATCAATGCTAGGAAGGAGAAGAAGAGACGAGGCGCAGATACTAGTGTCGGAATTGTTGGCCTCCTGCTGACCACAGCTA	......(((....((....((((((......))).)))....))...)))((((.((..((.((....(((.((..........)).)))...)).))..))))))((((....))))..	..................................................(((..((..((.((....(((.((..........)).)))...)).))..)).)))((((....))))..	40	34	22	24
350	469	37	-23.3	0.348	0.6	34.75	0.0125421	AAAGAAGTTCAAGAAAGATCTGGCTGCCATGCTGAGAATAATCAATGCTAGGAAGGAGAAGAAGAGACGAGGCGCAGATACTAGTGTCGGAATTGTTGGCCTCCTGCTGACCACAGCTAT	.....(((....((....((((((......))).)))....))...)))((((.((..((.((....(((.((..........)).)))...)).))..))))))((((....))))...	.................................................(((..((..((.((....(((.((..........)).)))...)).))..)).)))((((....))))...	40	34	22	24
351	470	37	-23.3	0.8	0.8	35.68	0.0114128	AAGAAGTTCAAGAAAGATCTGGCTGCCATGCTGAGAATAATCAATGCTAGGAAGGAGAAGAAGAGACGAGGCGCAGATACTAGTGTCGGAATTGTTGGCCTCCTGCTGACCACAGCTATG	....(((....((....((((((......))).)))....))...)))((((.((..((.((....(((.((..........)).)))...)).))..))))))((((....))))....	................................................(((..((..((.((....(((.((..........)).)))...)).))..)).)))((((....))))....	39	35	22	24
352	471	37	-24.8	0.492	0.68	20.32	0.0116153	AGAAGTTCAAGAAAGATCTGGCTGCCATGCTGAGAATAATCAATGCTAGGAAGGAGAAGAAGAGACGAGGCGCAGATACTAGTGTCGGAATTGTTGGCCTCCTGCTGACCACAGCTATGG	...((((..(((....))))))).((((((((.......(((..((.((((.((..((.((....(((.((..........)).)))...)).))..)))))))))))...)))).))))	...(((...(((....))).))).((((((((.......(((..((.(((..((..((.((....(((.((..........)).)))...)).))..)).))))))))...)))).))))	38	36	22	24
353	472	37	-28	0.12	0.5	14.69	0.013761	GAAGTTCAAGAAAGATCTGGCTGCCATGCTGAGAATAATCAATGCTAGGAAGGAGAAGAAGAGACGAGGCGCAGATACTAGTGTCGGAATTGTTGGCCTCCTGCTGACCACAGCTATGGC	..((((..(((....)))))))(((((((((.......(((..((.((((.((..((.((....(((.((..........)).)))...)).))..)))))))))))...)))).)))))	..(((...(((....))).)))(((((((((.......(((..((.(((..((..((.((....(((.((..........)).)))...)).))..)).))))))))...)))).)))))	37	36	23	24
354	473	37	-29.5	-0.84	0.19	15.52	0.0111297	AAGTTCAAGAAAGATCTGGCTGCCATGCTGAGAATAATCAATGCTAGGAAGGAGAAGAAGAGACGAGGCGCAGATACTAGTGTCGGAATTGTTGGCCTCCTGCTGACCACAGCTATGGCA	.((((..(((....)))))))(((((((((.......(((..((.((((.((..((.((....(((.((..........)).)))...)).))..)))))))))))...)))).))))).	.(((...(((....))).)))(((((((((.......(((..((.(((..((..((.((....(((.((..........)).)))...)).))..)).))))))))...)))).))))).	38	35	23	24
355	474	37	-31.3	-0.88	0.17	14.28	0.0145766	AGTTCAAGAAAGATCTGGCTGCCATGCTGAGAATAATCAATGCTAGGAAGGAGAAGAAGAGACGAGGCGCAGATACTAGTGTCGGAATTGTTGGCCTCCTGCTGACCACAGCTATGGCAG	..................(((((((((((.......(((..((.((((.((..((.((....(((.((..........)).)))...)).))..)))))))))))...)))).)))))))	..................(((((((((((.......(((..((.(((..((..((.((....(((.((..........)).)))...)).))..)).))))))))...)))).)))))))	37	36	23	24
356	475	37	-34.5	-1.52	0.03	12.5	0.0253994	GTTCAAGAAAGATCTGGCTGCCATGCTGAGAATAATCAATGCTAGGAAGGAGAAGAAGAGACGAGGCGCAGATACTAGTGTCGGAATTGTTGGCCTCCTGCTGACCACAGCTATGGCAGC	................((((((((((((.......(((..((.((((.((..((.((....(((.((..........)).)))...)).))..)))))))))))...)))).))))))))	......(......)..((((((((((((.......(((..((.(((..((..((.((....(((.((..........)).)))...)).))..)).))))))))...)))).))))))))	36	36	24	24
357	476	37	-36.1	-2.78	0	12.15	0.0287359	TTCAAGAAAGATCTGGCTGCCATGCTGAGAATAATCAATGCTAGGAAGGAGAAGAAGAGACGAGGCGCAGATACTAGTGTCGGAATTGTTGGCCTCCTGCTGACCACAGCTATGGCAGCG	...............((((((((((((.......(((..((.((((.((..((.((....(((.((..........)).)))...)).))..)))))))))))...)))).)))))))).	.....(......)..((((((((((((.......(((..((.(((..((..((.((....(((.((..........)).)))...)).))..)).))))))))...)))).)))))))).	36	36	24	24
358	477	37	-36.1	-1.89	0.01	12.48	0.0236473	TCAAGAAAGATCTGGCTGCCATGCTGAGAATAATCAATGCTAGGAAGGAGAAGAAGAGACGAGGCGCAGATACTAGTGTCGGAATTGTTGGCCTCCTGCTGACCACAGCTATGGCAGCGG	..............((((((((((((.......(((..((.((((.((..((.((....(((.((..........)).)))...)).))..)))))))))))...)))).))))))))..	..............((((((((((((.......(((..((.(((..((..((.((....(((.((..........)).)))...)).))..)).))))))))...)))).))))))))..	36	37	24	23
359	478	37	-36.4	-1.84	0.03	13.27	0.0135609	CAAGAAAGATCTGGCTGCCATGCTGAGAATAATCAATGCTAGGAAGGAGAAGAAGAGACGAGGCGCAGATACTAGTGTCGGAATTGTTGGCCTCCTGCTGACCACAGCTATGGCAGCGGA	...........(.((((((((((((.......(((..((.((((.((..((.((....(((.((..........)).)))...)).))..)))))))))))...)))).)))))))).).	..........(..((((((((((((.......(((..((.(((..((..((.((....(((.((..........)).)))...)).))..)).))))))))...)))).)))))))).).	37	37	24	22
360	479	37	-36.9	-2.25	0	12.8	0.0205117	AAGAAAGATCTGGCTGCCATGCTGAGAATAATCAATGCTAGGAAGGAGAAGAAGAGACGAGGCGCAGATACTAGTGTCGGAATTGTTGGCCTCCTGCTGACCACAGCTATGGCAGCGGAG	........((((.(((((((((((.......(((..((.((((.((..((.((....(((.((..........)).)))...)).))..)))))))))))...)))).))))))))))).	........(((.((((((((((((.......(((..((.(((..((..((.((....(((.((..........)).)))...)).))..)).))))))))...)))).))))))))))).	37	38	23	22
361	480	37	-36.9	-2.04	0.01	13.34	0.0173541	AGAAAGATCTGGCTGCCATGCTGAGAATAATCAATGCTAGGAAGGAGAAGAAGAGACGAGGCGCAGATACTAGTGTCGGAATTGTTGGCCTCCTGCTGACCACAGCTATGGCAGCGGAGG	.......((((.(((((((((((.......(((..((.((((.((..((.((....(((.((..........)).)))...)).))..)))))))))))...)))).)))))))))))..	.......(((.((((((((((((.......(((..((.(((..((..((.((....(((.((..........)).)))...)).))..)).))))))))...)))).)))))))))))..	36	39	23	22
362	481	37	-37.5	-2.9	0	14.09	0.0231596	GAAAGATCTGGCTGCCATGCTGAGAATAATCAATGCTAGGAAGGAGAAGAAGAGACGAGGCGCAGATACTAGTGTCGGAATTGTTGGCCTCCTGCTGACCACAGCTATGGCAGCGGAGGT	.....((((.((((((((((((.......(((..((.((((.((..((.((....(((.((..........)).)))...)).))..)))))))))))...)))).))))))))..))))	......((..((((((((((((.......(((..((.(((..((..((.((....(((.((..........)).)))...)).))..)).))))))))...)))).))))))))...)).	35	39	23	23
363	482	37	-40.2	-2.44	0	11.02	0.0489622	AAAGATCTGGCTGCCATGCTGAGAATAATCAATGCTAGGAAGGAGAAGAAGAGACGAGGCGCAGATACTAGTGTCGGAATTGTTGGCCTCCTGCTGACCACAGCTATGGCAGCGGAGGTC	...(((((.((((((((((((.......(((..((.((((.((..((.((....(((.((..........)).)))...)).))..)))))))))))...)))).))))))))..)))))	...(((((.((((((((((((.......(((..((.(((..((..((.((....(((.((..........)).)))...)).))..)).))))))))...)))).))))))))..)))))	35	38	24	23
364	483	37	-41.5	-3.08	0	10.84	0.0504862	AAGATCTGGCTGCCATGCTGAGAATAATCAATGCTAGGAAGGAGAAGAAGAGACGAGGCGCAGATACTAGTGTCGGAATTGTTGGCCTCCTGCTGACCACAGCTATGGCAGCGGAGGTCA	..(((((.((((((((((((.......(((..((.((((.((..((.((....(((.((..........)).)))...)).))..)))))))))))...)))).))))))))..))))).	..(((((.((((((((((((.......(((..((.(((..((..((.((....(((.((..........)).)))...)).))..)).))))))))...)))).))))))))..))))).	35	38	24	23
365	484	37	-41.5	-2.74	0	10.84	0.0504859	AGATCTGGCTGCCATGCTGAGAATAATCAATGCTAGGAAGGAGAAGAAGAGACGAGGCGCAGATACTAGTGTCGGAATTGTTGGCCTCCTGCTGACCACAGCTATGGCAGCGGAGGTCAC	.(((((.((((((((((((.......(((..((.((((.((..((.((....(((.((..........)).)))...)).))..)))))))))))...)))).))))))))..)))))..	.(((((.((((((((((((.......(((..((.(((..((..((.((....(((.((..........)).)))...)).))..)).))))))))...)))).))))))))..)))))..	34	38	25	23
366	485	37	-41.7	-2.72	0	10.84	0.0505419	GATCTGGCTGCCATGCTGAGAATAATCAATGCTAGGAAGGAGAAGAAGAGACGAGGCGCAGATACTAGTGTCGGAATTGTTGGCCTCCTGCTGACCACAGCTATGGCAGCGGAGGTCACT	(((((.((((((((((((.......(((..((.((((.((..((.((....(((.((..........)).)))...)).))..)))))))))))...)))).))))))))..)))))...	(((((.((((((((((((.......(((..((.(((..((..((.((....(((.((..........)).)))...)).))..)).))))))))...)))).))))))))..)))))...	33	38	25	24
367	486	37	-37.2	-1.88	0.03	20.4	0.0151333	ATCTGGCTGCCATGCTGAGAATAATCAATGCTAGGAAGGAGAAGAAGAGACGAGGCGCAGATACTAGTGTCGGAATTGTTGGCCTCCTGCTGACCACAGCTATGGCAGCGGAGGTCACTA	((((.((((((((((((.......(((..((.((((.((..((.((....(((.((..........)).)))...)).))..)))))))))))...)))).))))))))..)))).....	.....((((((((((((.......(((..((.(((..((..((.((....(((.((..........)).)))...)).))..)).))))))))...)))).))))))))...........	34	37	25	24
368	487	37	-36.9	-1.61	0.05	24.13	0.0128327	TCTGGCTGCCATGCTGAGAATAATCAATGCTAGGAAGGAGAAGAAGAGACGAGGCGCAGATACTAGTGTCGGAATTGTTGGCCTCCTGCTGACCACAGCTATGGCAGCGGAGGTCACTAG	((((.(((((((((((.......(((..((.((((.((..((.((....(((.((..........)).)))...)).))..)))))))))))...)))).))))))))))).........	....((((((((((((.......(((..((.(((..((..((.((....(((.((..........)).)))...)).))..)).))))))))...)))).))))))))............	33	38	25	24
369	488	37	-36.4	-1.53	0.03	25.12	0.0152235	CTGGCTGCCATGCTGAGAATAATCAATGCTAGGAAGGAGAAGAAGAGACGAGGCGCAGATACTAGTGTCGGAATTGTTGGCCTCCTGCTGACCACAGCTATGGCAGCGGAGGTCACTAGA	.(.((((((((((((.......(((..((.((((.((..((.((....(((.((..........)).)))...)).))..)))))))))))...)))).)))))))).)...........	...((((((((((((.......(((..((.(((..((..((.((....(((.((..........)).)))...)).))..)).))))))))...)))).)))))))).............	34	38	25	23
370	489	37	-36.7	-1.64	0.05	13.84	0.0221284	TGGCTGCCATGCTGAGAATAATCAATGCTAGGAAGGAGAAGAAGAGACGAGGCGCAGATACTAGTGTCGGAATTGTTGGCCTCCTGCTGACCACAGCTATGGCAGCGGAGGTCACTAGAC	(.((((((((((((.......(((..((.((((.((..((.((....(((.((..........)).)))...)).))..)))))))))))...)))).)))))))).)..(((....)))	(.((((((((((((.......(((..((.(((..((..((.((....(((.((..........)).)))...)).))..)).))))))))...)))).)))))))).)..(((....)))	34	38	25	23
371	490	37	-38.2	-2.28	0.03	10.81	0.0700081	GGCTGCCATGCTGAGAATAATCAATGCTAGGAAGGAGAAGAAGAGACGAGGCGCAGATACTAGTGTCGGAATTGTTGGCCTCCTGCTGACCACAGCTATGGCAGCGGAGGTCACTAGACG	.((((((((((((.......(((..((.((((.((..((.((....(((.((..........)).)))...)).))..)))))))))))...)))).))))))))....(((....))).	.((((((((((((.......(((..((.(((..((..((.((....(((.((..........)).)))...)).))..)).))))))))...)))).))))))))....(((....))).	34	39	25	22
372	491	37	-38.3	-2.22	0.01	10.95	0.0443421	GCTGCCATGCTGAGAATAATCAATGCTAGGAAGGAGAAGAAGAGACGAGGCGCAGATACTAGTGTCGGAATTGTTGGCCTCCTGCTGACCACAGCTATGGCAGCGGAGGTCACTAGACGT	((((((((((((.......(((..((.((((.((..((.((....(((.((..........)).)))...)).))..)))))))))))...)))).))))))))....(((....)))..	((((((((((((.......(((..((.(((..((..((.((....(((.((..........)).)))...)).))..)).))))))))...)))).))))))))....(((....)))..	34	38	25	23
373	492	37	-34.1	-0.81	0.17	36.98	0.015599	CTGCCATGCTGAGAATAATCAATGCTAGGAAGGAGAAGAAGAGACGAGGCGCAGATACTAGTGTCGGAATTGTTGGCCTCCTGCTGACCACAGCTATGGCAGCGGAGGTCACTAGACGTG	(((((((((((.......(((..((.((((.((..((.((....(((.((..........)).)))...)).))..)))))))))))...)))).)))))))...(.(((....))).).	....(..((.((......))...))..)................(((.((..........)).)))........(((((((.((((.(((......))))))))))))))..........	34	38	25	23
374	493	37	-34.2	-1.1	0.07	22.38	0.00644757	TGCCATGCTGAGAATAATCAATGCTAGGAAGGAGAAGAAGAGACGAGGCGCAGATACTAGTGTCGGAATTGTTGGCCTCCTGCTGACCACAGCTATGGCAGCGGAGGTCACTAGACGTGG	..((((((((..(((((((.(((((((.............................)))))))..).))))))(((((((.((((.(((......))))))))))))))..))).)))))	..(((((((...............................................................((((((((.((((.(((......)))))))))))))))..)).)))))	34	39	24	23
375	494	37	-35.4	-1.21	0.07	21.04	0.00708072	GCCATGCTGAGAATAATCAATGCTAGGAAGGAGAAGAAGAGACGAGGCGCAGATACTAGTGTCGGAATTGTTGGCCTCCTGCTGACCACAGCTATGGCAGCGGAGGTCACTAGACGTGGG	.((((((((..(((((((.(((((((.............................)))))))..).))))))(((((((.((((.(((......))))))))))))))..))).))))).	.(((((((...............................................................((((((((.((((.(((......)))))))))))))))..)).))))).	34	40	24	22
376	495	37	-35.3	-1.4	0.09	21	0.00706315	CCATGCTGAGAATAATCAATGCTAGGAAGGAGAAGAAGAGACGAGGCGCAGATACTAGTGTCGGAATTGTTGGCCTCCTGCTGACCACAGCTATGGCAGCGGAGGTCACTAGACGTGGGA	((((((((..(((((((.(((((((.............................)))))))..).))))))(((((((.((((.(((......))))))))))))))..))).)))))..	(((((((...............................................................((((((((.((((.(((......)))))))))))))))..)).)))))..	35	39	24	22
377	496	37	-33	-0.6	0.27	23.36	0.0144125	CATGCTGAGAATAATCAATGCTAGGAAGGAGAAGAAGAGACGAGGCGCAGATACTAGTGTCGGAATTGTTGGCCTCCTGCTGACCACAGCTATGGCAGCGGAGGTCACTAGACGTGGGAG	.....(((......)))(((((((................(((.((..........)).))).......((((((((.((((.(((......))))))))))))))))))).))).....	....................((((.............................................((((((((.((((.(((......))))))))))))))))))).........	35	40	23	22
378	497	37	-33	-1.16	0.09	17.45	0.0226529	ATGCTGAGAATAATCAATGCTAGGAAGGAGAAGAAGAGACGAGGCGCAGATACTAGTGTCGGAATTGTTGGCCTCCTGCTGACCACAGCTATGGCAGCGGAGGTCACTAGACGTGGGAGT	....(((......)))(((((((................(((.((..........)).))).......((((((((.((((.(((......))))))))))))))))))).)))......	................(((((((....................((((........)))).........((((((((.((((.(((......))))))))))))))))))).)))......	35	40	22	23
379	498	37	-33	-0.86	0.13	18.41	0.0187616	TGCTGAGAATAATCAATGCTAGGAAGGAGAAGAAGAGACGAGGCGCAGATACTAGTGTCGGAATTGTTGGCCTCCTGCTGACCACAGCTATGGCAGCGGAGGTCACTAGACGTGGGAGTG	...(((......)))(((((((................(((.((..........)).))).......((((((((.((((.(((......))))))))))))))))))).))).......	...............(((((((....................((((........)))).........((((((((.((((.(((......))))))))))))))))))).))).......	34	41	22	23
380	499	37	-33	-0.58	0.25	25.36	0.0120147	GCTGAGAATAATCAATGCTAGGAAGGAGAAGAAGAGACGAGGCGCAGATACTAGTGTCGGAATTGTTGGCCTCCTGCTGACCACAGCTATGGCAGCGGAGGTCACTAGACGTGGGAGTGC	..(((......)))(((((((................(((.((..........)).))).......((((((((.((((.(((......))))))))))))))))))).)))........	................(((((.............................................((((((((.((((.(((......))))))))))))))))))).)..........	34	41	23	22
381	500	37	-33	-0.85	0.19	22.15	0.0128483	CTGAGAATAATCAATGCTAGGAAGGAGAAGAAGAGACGAGGCGCAGATACTAGTGTCGGAATTGTTGGCCTCCTGCTGACCACAGCTATGGCAGCGGAGGTCACTAGACGTGGGAGTGCA	.(((......)))(((((((................(((.((..........)).))).......((((((((.((((.(((......))))))))))))))))))).))).........	..............((((((.............................................((((((((.((((.(((......))))))))))))))))))).))..........	35	40	23	22
382	501	37	-32.8	-0.91	0.15	22.39	0.00923861	TGAGAATAATCAATGCTAGGAAGGAGAAGAAGAGACGAGGCGCAGATACTAGTGTCGGAATTGTTGGCCTCCTGCTGACCACAGCTATGGCAGCGGAGGTCACTAGACGTGGGAGTGCAT	(((......)))(((((((................(((.((..........)).))).......((((((((.((((.(((......))))))))))))))))))).)))..........	.............((((((.............................................((((((((.((((.(((......))))))))))))))))))).))...........	35	40	22	23
383	502	37	-32.4	-1.08	0.07	21.4	0.0062744	GAGAATAATCAATGCTAGGAAGGAGAAGAAGAGACGAGGCGCAGATACTAGTGTCGGAATTGTTGGCCTCCTGCTGACCACAGCTATGGCAGCGGAGGTCACTAGACGTGGGAGTGCATA	........((.(((((((................(((.((..........)).))).......((((((((.((((.(((......))))))))))))))))))).)))..)).......	............((((((.............................................((((((((.((((.(((......))))))))))))))))))).))............	36	40	22	22
384	503	37	-32.4	-1.2	0.05	20.09	0.00778752	AGAATAATCAATGCTAGGAAGGAGAAGAAGAGACGAGGCGCAGATACTAGTGTCGGAATTGTTGGCCTCCTGCTGACCACAGCTATGGCAGCGGAGGTCACTAGACGTGGGAGTGCATAC	.......((.(((((((................(((.((..........)).))).......((((((((.((((.(((......))))))))))))))))))).)))..))........	...........((((((.............................................((((((((.((((.(((......))))))))))))))))))).)).............	36	39	23	22
385	504	37	-32.4	-1.16	0.09	20.24	0.00656856	GAATAATCAATGCTAGGAAGGAGAAGAAGAGACGAGGCGCAGATACTAGTGTCGGAATTGTTGGCCTCCTGCTGACCACAGCTATGGCAGCGGAGGTCACTAGACGTGGGAGTGCATACT	......((.(((((((................(((.((..........)).))).......((((((((.((((.(((......))))))))))))))))))).)))..)).........	..........((((((.............................................((((((((.((((.(((......))))))))))))))))))).))..............	35	39	23	23
386	505	37	-32.4	-0.88	0.15	20.35	0.00763965	AATAATCAATGCTAGGAAGGAGAAGAAGAGACGAGGCGCAGATACTAGTGTCGGAATTGTTGGCCTCCTGCTGACCACAGCTATGGCAGCGGAGGTCACTAGACGTGGGAGTGCATACTA	.....((.(((((((................(((.((..........)).))).......((((((((.((((.(((......))))))))))))))))))).)))..))..........	........(((((((.............................................((((((((.((((.(((......))))))))))))))))))).)))..............	36	38	23	23
387	506	37	-32.4	-0.55	0.27	20.49	0.00786736	ATAATCAATGCTAGGAAGGAGAAGAAGAGACGAGGCGCAGATACTAGTGTCGGAATTGTTGGCCTCCTGCTGACCACAGCTATGGCAGCGGAGGTCACTAGACGTGGGAGTGCATACTAT	....((.(((((((................(((.((..........)).))).......((((((((.((((.(((......))))))))))))))))))).)))..))...........	........((((((.............................................((((((((.((((.(((......))))))))))))))))))).))................	35	38	23	24
388	507	37	-32.4	-0.66	0.29	20.55	0.00813088	TAATCAATGCTAGGAAGGAGAAGAAGAGACGAGGCGCAGATACTAGTGTCGGAATTGTTGGCCTCCTGCTGACCACAGCTATGGCAGCGGAGGTCACTAGACGTGGGAGTGCATACTATA	...((.(((((((................(((.((..........)).))).......((((((((.((((.(((......))))))))))))))))))).)))..))............	.......((((((.............................................((((((((.((((.(((......))))))))))))))))))).)).................	35	38	23	24
389	508	37	-32.4	-0.75	0.25	20.56	0.00838995	AATCAATGCTAGGAAGGAGAAGAAGAGACGAGGCGCAGATACTAGTGTCGGAATTGTTGGCCTCCTGCTGACCACAGCTATGGCAGCGGAGGTCACTAGACGTGGGAGTGCATACTATAT	..((.(((((((................(((.((..........)).))).......((((((((.((((.(((......))))))))))))))))))).)))..)).............	......((((((.............................................((((((((.((((.(((......))))))))))))))))))).))..................	35	38	23	24
390	509	37	-32.4	-0.68	0.21	20.91	0.00755493	ATCAATGCTAGGAAGGAGAAGAAGAGACGAGGCGCAGATACTAGTGTCGGAATTGTTGGCCTCCTGCTGACCACAGCTATGGCAGCGGAGGTCACTAGACGTGGGAGTGCATACTATATG	.((.(((((((................(((.((..........)).))).......((((((((.((((.(((......))))))))))))))))))).)))..))..............	.....((((((.............................................((((((((.((((.(((......))))))))))))))))))).))...................	34	39	23	24
391	510	37	-33.2	-1.09	0.09	20.21	0.00689799	TCAATGCTAGGAAGGAGAAGAAGAGACGAGGCGCAGATACTAGTGTCGGAATTGTTGGCCTCCTGCTGACCACAGCTATGGCAGCGGAGGTCACTAGACGTGGGAGTGCATACTATATGT	((.(((((((................(((.((..........)).))).......((((((((.((((.(((......))))))))))))))))))).)))..))..(((((...)))))	...(((((((....................((((........)))).........((((((((.((((.(((......))))))))))))))))))).)))......(((((...)))))	33	39	23	25
392	511	37	-34	-1.02	0.17	18.99	0.0131265	CAATGCTAGGAAGGAGAAGAAGAGACGAGGCGCAGATACTAGTGTCGGAATTGTTGGCCTCCTGCTGACCACAGCTATGGCAGCGGAGGTCACTAGACGTGGGAGTGCATACTATATGTA	..(((((((................(((.((..........)).))).......((((((((.((((.(((......))))))))))))))))))).))).....((((((...))))))	..(((((((....................((((........)))).........((((((((.((((.(((......))))))))))))))))))).)))......(((((...))))).	34	39	23	24
393	512	37	-36.7	-1.86	0.05	13.61	0.0525707	AATGCTAGGAAGGAGAAGAAGAGACGAGGCGCAGATACTAGTGTCGGAATTGTTGGCCTCCTGCTGACCACAGCTATGGCAGCGGAGGTCACTAGACGTGGGAGTGCATACTATATGTAC	.(((((((................(((.((..........)).))).......((((((((.((((.(((......))))))))))))))))))).)))....(((((((...)))))))	.(((((((...................(((((........)))))........((((((((.((((.(((......))))))))))))))))))).)))....(((((((...)))))))	34	39	23	24
394	513	37	-38.1	-2.22	0	13.83	0.0403418	ATGCTAGGAAGGAGAAGAAGAGACGAGGCGCAGATACTAGTGTCGGAATTGTTGGCCTCCTGCTGACCACAGCTATGGCAGCGGAGGTCACTAGACGTGGGAGTGCATACTATATGTACT	(((((((................(((.((..........)).))).......((((((((.((((.(((......))))))))))))))))))).)))...((((((((...))))))))	(((((((...................(((((........)))))........((((((((.((((.(((......))))))))))))))))))).)))...((((((((...))))))))	33	39	23	25
395	514	37	-38.1	-1.88	0	15.71	0.0175584	TGCTAGGAAGGAGAAGAAGAGACGAGGCGCAGATACTAGTGTCGGAATTGTTGGCCTCCTGCTGACCACAGCTATGGCAGCGGAGGTCACTAGACGTGGGAGTGCATACTATATGTACTT	..((((................(((.((..........)).))).......((((((((.((((.(((......)))))))))))))))))))......(((((((((...)))))))))	..((((....................((((........)))).........((((((((.((((.(((......)))))))))))))))))))......(((((((((...)))))))))	32	39	23	26
396	515	37	-38.5	-1.79	0.01	15.35	0.0229765	GCTAGGAAGGAGAAGAAGAGACGAGGCGCAGATACTAGTGTCGGAATTGTTGGCCTCCTGCTGACCACAGCTATGGCAGCGGAGGTCACTAGACGTGGGAGTGCATACTATATGTACTTG	.((((................(((.((..........)).))).......((((((((.((((.(((......)))))))))))))))))))......(((((((((...))))))))).	.((((....................((((........)))).........((((((((.((((.(((......)))))))))))))))))))......(((((((((...))))))))).	32	40	23	25
397	516	37	-38.3	-1.75	0.03	16.1	0.0339569	CTAGGAAGGAGAAGAAGAGACGAGGCGCAGATACTAGTGTCGGAATTGTTGGCCTCCTGCTGACCACAGCTATGGCAGCGGAGGTCACTAGACGTGGGAGTGCATACTATATGTACTTGG	((((................(((.((..........)).))).......((((((((.((((.(((......)))))))))))))))))))......(((((((((...)))))))))..	((((...................(((((........)))))........((((((((.((((.(((......)))))))))))))))))))......(((((((((...)))))))))..	32	40	23	25
398	517	37	-36.9	-1.43	0.03	14.48	0.0189308	TAGGAAGGAGAAGAAGAGACGAGGCGCAGATACTAGTGTCGGAATTGTTGGCCTCCTGCTGACCACAGCTATGGCAGCGGAGGTCACTAGACGTGGGAGTGCATACTATATGTACTTGGA	...................(((.((..........)).))).......((((((((.((((.(((......)))))))))))))))(((....)))(((((((((...)))))))))...	......................(((((........)))))........((((((((.((((.(((......)))))))))))))))..........(((((((((...)))))))))...	33	40	22	25
399	518	37	-36.9	-1.93	0	14.62	0.0146954	AGGAAGGAGAAGAAGAGACGAGGCGCAGATACTAGTGTCGGAATTGTTGGCCTCCTGCTGACCACAGCTATGGCAGCGGAGGTCACTAGACGTGGGAGTGCATACTATATGTACTTGGAC	..................(((.((..........)).))).......((((((((.((((.(((......)))))))))))))))(((....)))(((((((((...)))))))))....	.....................(((((........)))))........((((((((.((((.(((......)))))))))))))))..........(((((((((...)))))))))....	33	40	23	24
400	519	37	-37.6	-1.95	0.03	14.36	0.0172705	GGAAGGAGAAGAAGAGACGAGGCGCAGATACTAGTGTCGGAATTGTTGGCCTCCTGCTGACCACAGCTATGGCAGCGGAGGTCACTAGACGTGGGAGTGCATACTATATGTACTTGGACA	.................(((.((..........)).))).......((((((((.((((.(((......)))))))))))))))......((..(((((((((...)))))))))..)).	.....................((((........)))).........((((((((.((((.(((......)))))))))))))))......((..(((((((((...)))))))))..)).	33	40	23	24
401	520	37	-37.6	-1.75	0.03	14.9	0.015549	GAAGGAGAAGAAGAGACGAGGCGCAGATACTAGTGTCGGAATTGTTGGCCTCCTGCTGACCACAGCTATGGCAGCGGAGGTCACTAGACGTGGGAGTGCATACTATATGTACTTGGACAG	................(((.((..........)).))).......((((((((.((((.(((......)))))))))))))))......((..(((((((((...)))))))))..))..	....................((((........)))).........((((((((.((((.(((......)))))))))))))))......((..(((((((((...)))))))))..))..	33	40	23	24
402	521	37	-37.6	-2.29	0	14.9	0.015077	AAGGAGAAGAAGAGACGAGGCGCAGATACTAGTGTCGGAATTGTTGGCCTCCTGCTGACCACAGCTATGGCAGCGGAGGTCACTAGACGTGGGAGTGCATACTATATGTACTTGGACAGA	...............(((.((..........)).))).......((((((((.((((.(((......)))))))))))))))......((..(((((((((...)))))))))..))...	...................((((........)))).........((((((((.((((.(((......)))))))))))))))......((..(((((((((...)))))))))..))...	34	39	23	24
403	522	37	-37.6	-1.96	0.03	14.88	0.0151289	AGGAGAAGAAGAGACGAGGCGCAGATACTAGTGTCGGAATTGTTGGCCTCCTGCTGACCACAGCTATGGCAGCGGAGGTCACTAGACGTGGGAGTGCATACTATATGTACTTGGACAGAA	..............(((.((..........)).))).......((((((((.((((.(((......)))))))))))))))......((..(((((((((...)))))))))..))....	..................((((........)))).........((((((((.((((.(((......)))))))))))))))......((..(((((((((...)))))))))..))....	34	39	23	24
404	523	37	-37.6	-1.89	0	14.87	0.0151192	GGAGAAGAAGAGACGAGGCGCAGATACTAGTGTCGGAATTGTTGGCCTCCTGCTGACCACAGCTATGGCAGCGGAGGTCACTAGACGTGGGAGTGCATACTATATGTACTTGGACAGAAA	.............(((.((..........)).))).......((((((((.((((.(((......)))))))))))))))......((..(((((((((...)))))))))..)).....	.................((((........)))).........((((((((.((((.(((......)))))))))))))))......((..(((((((((...)))))))))..)).....	34	39	23	24
405	524	37	-37.6	-2.01	0	14.86	0.0152225	GAGAAGAAGAGACGAGGCGCAGATACTAGTGTCGGAATTGTTGGCCTCCTGCTGACCACAGCTATGGCAGCGGAGGTCACTAGACGTGGGAGTGCATACTATATGTACTTGGACAGAAAC	............(((.((..........)).))).......((((((((.((((.(((......)))))))))))))))......((..(((((((((...)))))))))..))......	................((((........)))).........((((((((.((((.(((......)))))))))))))))......((..(((((((((...)))))))))..))......	34	38	24	24
406	525	37	-37.6	-2.6	0	15.36	0.0128373	AGAAGAAGAGACGAGGCGCAGATACTAGTGTCGGAATTGTTGGCCTCCTGCTGACCACAGCTATGGCAGCGGAGGTCACTAGACGTGGGAGTGCATACTATATGTACTTGGACAGAAACG	...........(((.((..........)).))).......((((((((.((((.(((......)))))))))))))))......((..(((((((((...)))))))))..)).......	..............(((((........)))))........((((((((.((((.(((......)))))))))))))))..........(((((((((...)))))))))...........	34	38	24	24
407	526	37	-37.6	-2.11	0.03	15.95	0.0104603	GAAGAAGAGACGAGGCGCAGATACTAGTGTCGGAATTGTTGGCCTCCTGCTGACCACAGCTATGGCAGCGGAGGTCACTAGACGTGGGAGTGCATACTATATGTACTTGGACAGAAACGA	..........(((.((..........)).))).......((((((((.((((.(((......)))))))))))))))......((..(((((((((...)))))))))..))........	.............(((((........)))))........((((((((.((((.(((......)))))))))))))))..........(((((((((...)))))))))............	34	38	24	24
408	527	37	-37.6	-1.79	0.05	16.69	0.00973956	AAGAAGAGACGAGGCGCAGATACTAGTGTCGGAATTGTTGGCCTCCTGCTGACCACAGCTATGGCAGCGGAGGTCACTAGACGTGGGAGTGCATACTATATGTACTTGGACAGAAACGAC	.........(((.((..........)).))).......((((((((.((((.(((......)))))))))))))))......((..(((((((((...)))))))))..)).........	.............((((........)))).........((((((((.((((.(((......)))))))))))))))..........(((((((((...))))))))).............	34	37	25	24
409	528	37	-38.3	-1.83	0.05	18.95	0.0146965	AGAAGAGACGAGGCGCAGATACTAGTGTCGGAATTGTTGGCCTCCTGCTGACCACAGCTATGGCAGCGGAGGTCACTAGACGTGGGAGTGCATACTATATGTACTTGGACAGAAACGACG	..........................((((...((((((((((((.((((.(((......)))))))))))))).(((....)))(((((((((...))))))))).)))))...)))).	......................................(((((((.((((.(((......))))))))))))))...........(((((((((...)))))))))..............	33	38	25	24
410	529	37	-40.9	-2.23	0.01	9.7	0.0990264	GAAGAGACGAGGCGCAGATACTAGTGTCGGAATTGTTGGCCTCCTGCTGACCACAGCTATGGCAGCGGAGGTCACTAGACGTGGGAGTGCATACTATATGTACTTGGACAGAAACGACGC	.......................((((((...((((((((((((.((((.(((......)))))))))))))).(((....)))(((((((((...))))))))).)))))...))))))	.......................((((((...((((((((((((.((((.(((......)))))))))))))).(((....)))(((((((((...))))))))).)))))...))))))	32	38	26	24
411	530	37	-42.5	-3.1	0	7.03	0.0900672	AAGAGACGAGGCGCAGATACTAGTGTCGGAATTGTTGGCCTCCTGCTGACCACAGCTATGGCAGCGGAGGTCACTAGACGTGGGAGTGCATACTATATGTACTTGGACAGAAACGACGCT	.....................(((((((...((((((((((((.((((.(((......)))))))))))))).(((....)))(((((((((...))))))))).)))))...)))))))	.....................(((((((...((((((((((((.((((.(((......)))))))))))))).(((....)))(((((((((...))))))))).)))))...)))))))	32	37	26	25
412	531	37	-43.4	-1.91	0.01	6.69	0.0749049	AGAGACGAGGCGCAGATACTAGTGTCGGAATTGTTGGCCTCCTGCTGACCACAGCTATGGCAGCGGAGGTCACTAGACGTGGGAGTGCATACTATATGTACTTGGACAGAAACGACGCTG	...................((((((((...((((((((((((.((((.(((......)))))))))))))).(((....)))(((((((((...))))))))).)))))...))))))))	...................((((((((...((((((((((((.((((.(((......)))))))))))))).(((....)))(((((((((...))))))))).)))))...))))))))	31	38	26	25
413	532	37	-46.4	-3.11	0	5.76	0.136307	GAGACGAGGCGCAGATACTAGTGTCGGAATTGTTGGCCTCCTGCTGACCACAGCTATGGCAGCGGAGGTCACTAGACGTGGGAGTGCATACTATATGTACTTGGACAGAAACGACGCTGG	.................(((((((((...((((((((((((.((((.(((......)))))))))))))).(((....)))(((((((((...))))))))).)))))...)))))))))	.................(((((((((...((((((((((((.((((.(((......)))))))))))))).(((....)))(((((((((...))))))))).)))))...)))))))))	30	39	26	25
414	533	37	-47.5	-3.13	0	5.55	0.146843	AGACGAGGCGCAGATACTAGTGTCGGAATTGTTGGCCTCCTGCTGACCACAGCTATGGCAGCGGAGGTCACTAGACGTGGGAGTGCATACTATATGTACTTGGACAGAAACGACGCTGGG	................(((((((((...((((((((((((.((((.(((......)))))))))))))).(((....)))(((((((((...))))))))).)))))...))))))))).	................(((((((((...((((((((((((.((((.(((......)))))))))))))).(((....)))(((((((((...))))))))).)))))...))))))))).	30	39	26	25
415	534	37	-47.5	-2.81	0	5.69	0.140973	GACGAGGCGCAGATACTAGTGTCGGAATTGTTGGCCTCCTGCTGACCACAGCTATGGCAGCGGAGGTCACTAGACGTGGGAGTGCATACTATATGTACTTGGACAGAAACGACGCTGGGG	...............(((((((((...((((((((((((.((((.(((......)))))))))))))).(((....)))(((((((((...))))))))).)))))...)))))))))..	...............(((((((((...((((((((((((.((((.(((......)))))))))))))).(((....)))(((((((((...))))))))).)))))...)))))))))..	29	40	26	25
416	535	37	-47.5	-2.9	0	5.3	0.154849	ACGAGGCGCAGATACTAGTGTCGGAATTGTTGGCCTCCTGCTGACCACAGCTATGGCAGCGGAGGTCACTAGACGTGGGAGTGCATACTATATGTACTTGGACAGAAACGACGCTGGGGA	..............(((((((((...((((((((((((.((((.(((......)))))))))))))).(((....)))(((((((((...))))))))).)))))...)))))))))...	..............(((((((((...((((((((((((.((((.(((......)))))))))))))).(((....)))(((((((((...))))))))).)))))...)))))))))...	30	39	26	25
417	536	37	-47.5	-3.47	0	5.18	0.15924	CGAGGCGCAGATACTAGTGTCGGAATTGTTGGCCTCCTGCTGACCACAGCTATGGCAGCGGAGGTCACTAGACGTGGGAGTGCATACTATATGTACTTGGACAGAAACGACGCTGGGGAG	.............(((((((((...((((((((((((.((((.(((......)))))))))))))).(((....)))(((((((((...))))))))).)))))...)))))))))....	.............(((((((((...((((((((((((.((((.(((......)))))))))))))).(((....)))(((((((((...))))))))).)))))...)))))))))....	29	40	26	25
418	537	37	-47.5	-2.54	0	5.11	0.160892	GAGGCGCAGATACTAGTGTCGGAATTGTTGGCCTCCTGCTGACCACAGCTATGGCAGCGGAGGTCACTAGACGTGGGAGTGCATACTATATGTACTTGGACAGAAACGACGCTGGGGAGG	............(((((((((...((((((((((((.((((.(((......)))))))))))))).(((....)))(((((((((...))))))))).)))))...))))))))).....	............(((((((((...((((((((((((.((((.(((......)))))))))))))).(((....)))(((((((((...))))))))).)))))...))))))))).....	29	41	25	25
419	538	37	-48.4	-3.38	0	6.22	0.119653	AGGCGCAGATACTAGTGTCGGAATTGTTGGCCTCCTGCTGACCACAGCTATGGCAGCGGAGGTCACTAGACGTGGGAGTGCATACTATATGTACTTGGACAGAAACGACGCTGGGGAGGC	....((.....(((((((((...((((((((((((.((((.(((......)))))))))))))).(((....)))(((((((((...))))))))).)))))...)))))))))....))	....((.....(((((((((...((((((((((((.((((.(((......)))))))))))))).(((....)))(((((((((...))))))))).)))))...)))))))))....))	29	40	26	25
420	539	37	-50.2	-3.54	0	6.6	0.0991847	GGCGCAGATACTAGTGTCGGAATTGTTGGCCTCCTGCTGACCACAGCTATGGCAGCGGAGGTCACTAGACGTGGGAGTGCATACTATATGTACTTGGACAGAAACGACGCTGGGGAGGCC	(((.......(((((((((...((((((((((((.((((.(((......)))))))))))))).(((....)))(((((((((...))))))))).)))))...)))))))))....)))	(((.......(((((((((...((((((((((((.((((.(((......)))))))))))))).(((....)))(((((((((...))))))))).)))))...)))))))))....)))	28	40	27	25
421	540	37	-49.3	-3.12	0	6.11	0.0812805	GCGCAGATACTAGTGTCGGAATTGTTGGCCTCCTGCTGACCACAGCTATGGCAGCGGAGGTCACTAGACGTGGGAGTGCATACTATATGTACTTGGACAGAAACGACGCTGGGGAGGCCA	(.((.....(((((((((...((((((((((((.((((.(((......)))))))))))))).(((....)))(((((((((...))))))))).)))))...)))))))))....))).	..((.....(((((((((...((((((((((((.((((.(((......)))))))))))))).(((....)))(((((((((...))))))))).)))))...)))))))))....))..	29	39	27	25
422	541	37	-49.2	-2.74	0	5.42	0.150891	CGCAGATACTAGTGTCGGAATTGTTGGCCTCCTGCTGACCACAGCTATGGCAGCGGAGGTCACTAGACGTGGGAGTGCATACTATATGTACTTGGACAGAAACGACGCTGGGGAGGCCAT	.((.....(((((((((...((((((((((((.((((.(((......)))))))))))))).(((....)))(((((((((...))))))))).)))))...)))))))))....))...	.((.....(((((((((...((((((((((((.((((.(((......)))))))))))))).(((....)))(((((((((...))))))))).)))))...)))))))))....))...	29	38	27	26
423	542	37	-48.9	-3.5	0	5.64	0.142101	GCAGATACTAGTGTCGGAATTGTTGGCCTCCTGCTGACCACAGCTATGGCAGCGGAGGTCACTAGACGTGGGAGTGCATACTATATGTACTTGGACAGAAACGACGCTGGGGAGGCCATA	((.....(((((((((...((((((((((((.((((.(((......)))))))))))))).(((....)))(((((((((...))))))))).)))))...)))))))))....))....	((.....(((((((((...((((((((((((.((((.(((......)))))))))))))).(((....)))(((((((((...))))))))).)))))...)))))))))....))....	30	38	26	26
424	543	37	-47.5	-3.25	0	6.04	0.114542	CAGATACTAGTGTCGGAATTGTTGGCCTCCTGCTGACCACAGCTATGGCAGCGGAGGTCACTAGACGTGGGAGTGCATACTATATGTACTTGGACAGAAACGACGCTGGGGAGGCCATAT	......(((((((((...((((((((((((.((((.(((......)))))))))))))).(((....)))(((((((((...))))))))).)))))...)))))))))...........	......(((((((((...((((((((((((.((((.(((......)))))))))))))).(((....)))(((((((((...))))))))).)))))...)))))))))...........	30	37	26	27
425	544	37	-47.5	-4.07	0	6.54	0.107776	AGATACTAGTGTCGGAATTGTTGGCCTCCTGCTGACCACAGCTATGGCAGCGGAGGTCACTAGACGTGGGAGTGCATACTATATGTACTTGGACAGAAACGACGCTGGGGAGGCCATATC	.....(((((((((...((((((((((((.((((.(((......)))))))))))))).(((....)))(((((((((...))))))))).)))))...)))))))))............	.....(((((((((...((((((((((((.((((.(((......)))))))))))))).(((....)))(((((((((...))))))))).)))))...)))))))))............	30	37	26	27
426	545	37	-47.5	-3.04	0	8.2	0.0639821	GATACTAGTGTCGGAATTGTTGGCCTCCTGCTGACCACAGCTATGGCAGCGGAGGTCACTAGACGTGGGAGTGCATACTATATGTACTTGGACAGAAACGACGCTGGGGAGGCCATATCT	....(((((((((...((((((((((((.((((.(((......)))))))))))))).(((....)))(((((((((...))))))))).)))))...))))))))).............	....(((((((((...((((((((((((.((((.(((......)))))))))))))).(((....)))(((((((((...))))))))).)))))...))))))))).............	29	37	26	28
427	546	37	-47.5	-3.2	0.01	7.87	0.0578128	ATACTAGTGTCGGAATTGTTGGCCTCCTGCTGACCACAGCTATGGCAGCGGAGGTCACTAGACGTGGGAGTGCATACTATATGTACTTGGACAGAAACGACGCTGGGGAGGCCATATCTT	...(((((((((...((((((((((((.((((.(((......)))))))))))))).(((....)))(((((((((...))))))))).)))))...)))))))))..............	...(((((((((...((((((((((((.((((.(((......)))))))))))))).(((....)))(((((((((...))))))))).)))))...)))))))))..............	29	36	26	29
428	547	37	-47.5	-3.08	0	8.87	0.0390742	TACTAGTGTCGGAATTGTTGGCCTCCTGCTGACCACAGCTATGGCAGCGGAGGTCACTAGACGTGGGAGTGCATACTATATGTACTTGGACAGAAACGACGCTGGGGAGGCCATATCTTT	..(((((((((...((((((((((((.((((.(((......)))))))))))))).(((....)))(((((((((...))))))))).)))))...)))))))))...............	..(((((((((...((((((((((((.((((.(((......)))))))))))))).(((....)))(((((((((...))))))))).)))))...)))))))))...............	28	36	26	30
429	548	37	-47.5	-2.82	0.01	9.49	0.0309277	ACTAGTGTCGGAATTGTTGGCCTCCTGCTGACCACAGCTATGGCAGCGGAGGTCACTAGACGTGGGAGTGCATACTATATGTACTTGGACAGAAACGACGCTGGGGAGGCCATATCTTTT	.(((((((((...((((((((((((.((((.(((......)))))))))))))).(((....)))(((((((((...))))))))).)))))...)))))))))................	.(((((((((...((((((((((((.((((.(((......)))))))))))))).(((....)))(((((((((...))))))))).)))))...)))))))))................	28	36	26	30
430	549	37	-47.2	-2.66	0	10	0.0276098	CTAGTGTCGGAATTGTTGGCCTCCTGCTGACCACAGCTATGGCAGCGGAGGTCACTAGACGTGGGAGTGCATACTATATGTACTTGGACAGAAACGACGCTGGGGAGGCCATATCTTTTC	(((((((((...((((((((((((.((((.(((......)))))))))))))).(((....)))(((((((((...))))))))).)))))...))))))))).................	(((((((((...((((((((((((.((((.(((......)))))))))))))).(((....)))(((((((((...))))))))).)))))...))))))))).................	27	36	27	30
431	550	37	-47.5	-2.98	0	9.98	0.100938	TAGTGTCGGAATTGTTGGCCTCCTGCTGACCACAGCTATGGCAGCGGAGGTCACTAGACGTGGGAGTGCATACTATATGTACTTGGACAGAAACGACGCTGGGGAGGCCATATCTTTTCC	.(((((((...((((((((((((.((((.(((......)))))))))))))).(((....)))(((((((((...))))))))).)))))...)))))))(((((((......)))))))	.(((((((...((((((((((((.((((.(((......)))))))))))))).(((....)))(((((((((...))))))))).)))))...)))))))(((((((......)))))))	27	36	27	30
432	551	37	-48.9	-3.51	0	6.43	0.124866	AGTGTCGGAATTGTTGGCCTCCTGCTGACCACAGCTATGGCAGCGGAGGTCACTAGACGTGGGAGTGCATACTATATGTACTTGGACAGAAACGACGCTGGGGAGGCCATATCTTTTCCA	(((((((...((((((((((((.((((.(((......)))))))))))))).(((....)))(((((((((...))))))))).)))))...)))))))(((((((......))))))).	(((((((...((((((((((((.((((.(((......)))))))))))))).(((....)))(((((((((...))))))))).)))))...)))))))(((((((......))))))).	28	36	27	29
433	552	37	-48.9	-3.82	0	5.65	0.140503	GTGTCGGAATTGTTGGCCTCCTGCTGACCACAGCTATGGCAGCGGAGGTCACTAGACGTGGGAGTGCATACTATATGTACTTGGACAGAAACGACGCTGGGGAGGCCATATCTTTTCCAA	((((((...((((((((((((.((((.(((......)))))))))))))).(((....)))(((((((((...))))))))).)))))...))))))((((((((......)))))))).	((((((...((((((((((((.((((.(((......)))))))))))))).(((....)))(((((((((...))))))))).)))))...))))))((((((((......)))))))).	28	36	27	29
434	553	37	-45.3	-2.78	0	21.25	0.0597678	TGTCGGAATTGTTGGCCTCCTGCTGACCACAGCTATGGCAGCGGAGGTCACTAGACGTGGGAGTGCATACTATATGTACTTGGACAGAAACGACGCTGGGGAGGCCATATCTTTTCCAAC	.((((...((((((((((((.((((.(((......)))))))))))))).(((....)))(((((((((...))))))))).)))))...))))..((((((((......))))))))..	.((((...((((((((((((.((((.(((......)))))))))))))).(((....)))(((((((((...))))))))).)))))...))))..((((((((......))))))))..	28	35	28	29
435	554	37	-45.5	-2.37	0.01	28.12	0.0751393	GTCGGAATTGTTGGCCTCCTGCTGACCACAGCTATGGCAGCGGAGGTCACTAGACGTGGGAGTGCATACTATATGTACTTGGACAGAAACGACGCTGGGGAGGCCATATCTTTTCCAACC	((((...((((((((((((.((((.(((......)))))))))))))).(((....)))(((((((((...))))))))).)))))...))))..((((((((......))))))))...	((((...((((.(((((((.((((.(((......)))))))))))))).(((....)))(((((((((...)))))))))..))))...))))..((((((((......))))))))...	28	35	29	28
436	555	37	-44.1	-2.81	0	23.6	0.0686502	TCGGAATTGTTGGCCTCCTGCTGACCACAGCTATGGCAGCGGAGGTCACTAGACGTGGGAGTGCATACTATATGTACTTGGACAGAAACGACGCTGGGGAGGCCATATCTTTTCCAACCA	..((((..(.(((((((((((((....)))).....(((((..((((....)))((..(((((((((...)))))))))..)).....)..))))))))))))))...)..)))).....	..((((..(.(((((((((.......................................(((((((((...))))))))).................)))))))))...)..)))).....	29	34	29	28
437	556	37	-44.1	-2.41	0	23.51	0.0700929	CGGAATTGTTGGCCTCCTGCTGACCACAGCTATGGCAGCGGAGGTCACTAGACGTGGGAGTGCATACTATATGTACTTGGACAGAAACGACGCTGGGGAGGCCATATCTTTTCCAACCAC	.((((..(.(((((((((((((....)))).....(((((..((((....)))((..(((((((((...)))))))))..)).....)..))))))))))))))...)..))))......	.((((..(.(((((((((.......................................(((((((((...))))))))).................)))))))))...)..))))......	29	34	30	27
438	557	37	-44.3	-2.86	0	25.97	0.0668781	GGAATTGTTGGCCTCCTGCTGACCACAGCTATGGCAGCGGAGGTCACTAGACGTGGGAGTGCATACTATATGTACTTGGACAGAAACGACGCTGGGGAGGCCATATCTTTTCCAACCACA	((((..(.(((((((((((((....)))).....(((((..((((....)))((..(((((((((...)))))))))..)).....)..))))))))))))))...)..)))).......	((((..(.(((((((((.......................................(((((((((...))))))))).................)))))))))...)..)))).......	30	34	29	27
439	558	37	-42.4	-2.32	0.01	13.01	0.0457158	GAATTGTTGGCCTCCTGCTGACCACAGCTATGGCAGCGGAGGTCACTAGACGTGGGAGTGCATACTATATGTACTTGGACAGAAACGACGCTGGGGAGGCCATATCTTTTCCAACCACAT	.......((((((((.((((.(((......)))))))))))))))......(((((((((((((...)))))))))...............((((((((......)))))))).))))..	.......((((((((.((((.(((......)))))))))))))))......(((((((((((((...)))))))))...............((((((((......)))))))).))))..	30	33	29	28
440	559	37	-42.4	-2.59	0.01	11.67	0.0474449	AATTGTTGGCCTCCTGCTGACCACAGCTATGGCAGCGGAGGTCACTAGACGTGGGAGTGCATACTATATGTACTTGGACAGAAACGACGCTGGGGAGGCCATATCTTTTCCAACCACATT	......((((((((.((((.(((......)))))))))))))))......(((((((((((((...)))))))))...............((((((((......)))))))).))))...	......((((((((.((((.(((......)))))))))))))))......(((((((((((((...)))))))))...............((((((((......)))))))).))))...	30	32	29	29
441	560	37	-42.4	-2.76	0	11.71	0.0461832	ATTGTTGGCCTCCTGCTGACCACAGCTATGGCAGCGGAGGTCACTAGACGTGGGAGTGCATACTATATGTACTTGGACAGAAACGACGCTGGGGAGGCCATATCTTTTCCAACCACATTG	.....((((((((.((((.(((......)))))))))))))))......(((((((((((((...)))))))))...............((((((((......)))))))).))))....	.....((((((((.((((.(((......)))))))))))))))......(((((((((((((...)))))))))...............((((((((......)))))))).))))....	29	33	29	29
442	561	37	-42.4	-2.37	0	14.84	0.0303778	TTGTTGGCCTCCTGCTGACCACAGCTATGGCAGCGGAGGTCACTAGACGTGGGAGTGCATACTATATGTACTTGGACAGAAACGACGCTGGGGAGGCCATATCTTTTCCAACCACATTGG	....((((((((.((((.(((......)))))))))))))))......(((((((((((((...)))))))))...............((((((((......)))))))).)))).....	....((((((((.((((.(((......)))))))))))))))......(((((((((((((...)))))))))...............((((((((......)))))))).)))).....	28	34	29	29
443	562	37	-43.2	-2.29	0	22.45	0.0480717	TGTTGGCCTCCTGCTGACCACAGCTATGGCAGCGGAGGTCACTAGACGTGGGAGTGCATACTATATGTACTTGGACAGAAACGACGCTGGGGAGGCCATATCTTTTCCAACCACATTGGG	...((((((((.((((.(((......)))))))))))))))((((..(((((((((((((...)))))))))...............((((((((......)))))))).)))).)))).	...((((((((.((((.(((......)))))))))))))))......(((((((((((((...)))))))))...............((((((((......)))))))).))))......	28	35	29	28
444	563	37	-43.2	-1.81	0.03	27.04	0.0321288	GTTGGCCTCCTGCTGACCACAGCTATGGCAGCGGAGGTCACTAGACGTGGGAGTGCATACTATATGTACTTGGACAGAAACGACGCTGGGGAGGCCATATCTTTTCCAACCACATTGGGG	..((((((((.((((.(((......)))))))))))))))((((..(((((((((((((...)))))))))...............((((((((......)))))))).)))).))))..	..((((((((.((((.(((......)))))))))))))))......(((((((((((((...)))))))))...............((((((((......)))))))).)))).......	28	36	29	27
445	564	37	-43.2	-2.49	0.01	36.44	0.0204253	TTGGCCTCCTGCTGACCACAGCTATGGCAGCGGAGGTCACTAGACGTGGGAGTGCATACTATATGTACTTGGACAGAAACGACGCTGGGGAGGCCATATCTTTTCCAACCACATTGGGGA	.((((((((.((((.(((......)))))))))))))))((((..(((((((((((((...)))))))))...............((((((((......)))))))).)))).))))...	..(((((...((((.(((......)))))))..)))))...........(((((((((...)))))))))..................................................	29	35	29	27
446	565	37	-43.5	-2.09	0.01	36.29	0.027795	TGGCCTCCTGCTGACCACAGCTATGGCAGCGGAGGTCACTAGACGTGGGAGTGCATACTATATGTACTTGGACAGAAACGACGCTGGGGAGGCCATATCTTTTCCAACCACATTGGGGAT	(((((((((((((....)))).....(((((..((((....)))((..(((((((((...)))))))))..)).....)..)))))))))))))).....(((((((.....))))))).	.(((((((.((((.(((......)))))))..................(((((((((...)))))))))..................))))))).......(((((.......)))))..	29	35	29	27
447	566	37	-43	-2.21	0.03	35.71	0.0271865	GGCCTCCTGCTGACCACAGCTATGGCAGCGGAGGTCACTAGACGTGGGAGTGCATACTATATGTACTTGGACAGAAACGACGCTGGGGAGGCCATATCTTTTCCAACCACATTGGGGATG	((((((((((((....)))).....(((((..((((....)))((..(((((((((...)))))))))..)).....)..)))))))))))))......(((((((.....)))))))..	(((((((.((((.((........))))))..................(((((((((...)))))))))..................)))))))........(((((.....)))))....	29	36	29	26
448	567	37	-39.9	-1.75	0.05	34.74	0.0243242	GCCTCCTGCTGACCACAGCTATGGCAGCGGAGGTCACTAGACGTGGGAGTGCATACTATATGTACTTGGACAGAAACGACGCTGGGGAGGCCATATCTTTTCCAACCACATTGGGGATGA	(((((((((((....)))).....(((((..((((....)))((..(((((((((...)))))))))..)).....)..))))))))))))....((.(((((((.....))))))).))	.((((..((((.(((......)))))))..................(((((((((...)))))))))...................))))......(.(((((((.....))))))).).	30	35	29	26
449	568	37	-38.9	-1.63	0.05	25.62	0.0440849	CCTCCTGCTGACCACAGCTATGGCAGCGGAGGTCACTAGACGTGGGAGTGCATACTATATGTACTTGGACAGAAACGACGCTGGGGAGGCCATATCTTTTCCAACCACATTGGGGATGAA	(((((.((((.(((......))))))))))))((.((((.(((.((((((((((...))))))))).........).))))))).)).......((.(((((((.....))))))).)).	(((((.((((.(((......)))))))))))).............(((((((((...)))))))))......................................................	31	34	29	26
450	569	37	-37.9	-1.37	0.07	23.31	0.0728188	CTCCTGCTGACCACAGCTATGGCAGCGGAGGTCACTAGACGTGGGAGTGCATACTATATGTACTTGGACAGAAACGACGCTGGGGAGGCCATATCTTTTCCAACCACATTGGGGATGAAT	...((((((.(((......))))))))).((((.((((.(((.((((((((((...))))))))).........).)))))))...))))...((.(((((((.....))))))).))..	.(((.((((.(((......))))))))))((((.((((.(((.((((((((((...))))))))).........).)))))))...))))...((.(((((((.....))))))).))..	31	34	28	27
451	570	37	-37.9	-1.31	0.09	7.87	0.125433	TCCTGCTGACCACAGCTATGGCAGCGGAGGTCACTAGACGTGGGAGTGCATACTATATGTACTTGGACAGAAACGACGCTGGGGAGGCCATATCTTTTCCAACCACATTGGGGATGAATA	..((((((.(((......))))))))).((((.((((.(((.((((((((((...))))))))).........).)))))))...))))...((.(((((((.....))))))).))...	..((((((.(((......))))))))).((((.((((.(((.((((((((((...))))))))).........).)))))))...))))...((.(((((((.....))))))).))...	32	34	27	27
452	571	37	-37.9	-2.15	0.03	6.02	0.180363	CCTGCTGACCACAGCTATGGCAGCGGAGGTCACTAGACGTGGGAGTGCATACTATATGTACTTGGACAGAAACGACGCTGGGGAGGCCATATCTTTTCCAACCACATTGGGGATGAATAA	.((((((.(((......))))))))).((((.((((.(((.((((((((((...))))))))).........).)))))))...))))...((.(((((((.....))))))).))....	.((((((.(((......))))))))).((((.((((.(((.((((((((((...))))))))).........).)))))))...))))...((.(((((((.....))))))).))....	33	34	27	26
453	572	37	-37.5	-1.71	0.07	5.64	0.18566	CTGCTGACCACAGCTATGGCAGCGGAGGTCACTAGACGTGGGAGTGCATACTATATGTACTTGGACAGAAACGACGCTGGGGAGGCCATATCTTTTCCAACCACATTGGGGATGAATAAG	((((((.(((......))))))))).((((.((((.(((.((((((((((...))))))))).........).)))))))...))))...((.(((((((.....))))))).)).....	((((((.(((......))))))))).((((.((((.(((.((((((((((...))))))))).........).)))))))...))))...((.(((((((.....))))))).)).....	33	35	26	26
454	573	37	-34.6	-0.91	0.13	9.17	0.0935987	TGCTGACCACAGCTATGGCAGCGGAGGTCACTAGACGTGGGAGTGCATACTATATGTACTTGGACAGAAACGACGCTGGGGAGGCCATATCTTTTCCAACCACATTGGGGATGAATAAGT	(((((.(((......))))))))..((((.((((.(((.((((((((((...))))))))).........).)))))))...))))...((.(((((((.....))))))).))......	(((((.(((......))))))))..((((.((((.(((.((((((((((...))))))))).........).)))))))...))))...((.(((((((.....))))))).))......	33	35	25	27
455	574	37	-34.6	-1.2	0.11	10.69	0.147756	GCTGACCACAGCTATGGCAGCGGAGGTCACTAGACGTGGGAGTGCATACTATATGTACTTGGACAGAAACGACGCTGGGGAGGCCATATCTTTTCCAACCACATTGGGGATGAATAAGTG	((((.(((......)))))))...((((.((((.(((.((((((((((...))))))))).........).)))))))...))))...((.(((((((.....))))))).)).......	((((.(((......)))))))...((((.((((.(((.((((((((((...))))))))).........).)))))))...))))...((.(((((((.....))))))).)).......	33	36	25	26
456	575	37	-30	0.021	0.47	27.41	0.017858	CTGACCACAGCTATGGCAGCGGAGGTCACTAGACGTGGGAGTGCATACTATATGTACTTGGACAGAAACGACGCTGGGGAGGCCATATCTTTTCCAACCACATTGGGGATGAATAAGTGT	.(((((...(((.....)))...)))))((((.(((.((((((((((...))))))))).........).)))))))..........((.(((((((.....))))))).))........	.(((((...(((.....)))...)))))((((.(((.((((((((((...))))))))).........).)))))))..........((.(((((((.....))))))).))........	33	35	25	27
457	576	37	-30.9	-0.17	0.37	24.58	0.0428711	TGACCACAGCTATGGCAGCGGAGGTCACTAGACGTGGGAGTGCATACTATATGTACTTGGACAGAAACGACGCTGGGGAGGCCATATCTTTTCCAACCACATTGGGGATGAATAAGTGTT	(((((...(((.....)))...)))))((((.(((.((((((((((...))))))))).........).))))))).((.((....((.(((((((.....))))))).))....)).))	(((((...(((.....)))...)))))((((.(((.((((((((((...))))))))).........).)))))))..........((.(((((((.....))))))).)).........	33	35	24	28
458	577	37	-31.2	-0.51	0.27	27.26	0.0724902	GACCACAGCTATGGCAGCGGAGGTCACTAGACGTGGGAGTGCATACTATATGTACTTGGACAGAAACGACGCTGGGGAGGCCATATCTTTTCCAACCACATTGGGGATGAATAAGTGTTA	((((...(((.....)))...)))).((((.(((.((((((((((...))))))))).........).))))))).((.((....((.(((((((.....))))))).))....)).)).	((((...(((.....)))...)))).((((.(((.((((((((((...))))))))).........).)))))))..........((.(((((((.....))))))).))..........	34	35	24	27
459	578	37	-30.1	-0.19	0.33	23.91	0.0396626	ACCACAGCTATGGCAGCGGAGGTCACTAGACGTGGGAGTGCATACTATATGTACTTGGACAGAAACGACGCTGGGGAGGCCATATCTTTTCCAACCACATTGGGGATGAATAAGTGTTAT	.((((..(((((((.......)))).)))..))))(((((((((...)))))))))..........((((((.((....))...((.(((((((.....))))))).))...))))))..	.((((..(((((((.......)))).)))..))))(((((((((...)))))))))..........((((((............((.(((((((.....))))))).))...))))))..	34	34	24	28
460	579	37	-29.8	-0.47	0.35	26.53	0.0349898	CCACAGCTATGGCAGCGGAGGTCACTAGACGTGGGAGTGCATACTATATGTACTTGGACAGAAACGACGCTGGGGAGGCCATATCTTTTCCAACCACATTGGGGATGAATAAGTGTTATA	((((..(((((((.......)))).)))..))))(((((((((...)))))))))..........((((((.((....))...((.(((((((.....))))))).))...))))))...	((((..(((((((.......)))).)))..))))(((((((((...)))))))))..........((((((............((.(((((((.....))))))).))...))))))...	34	34	24	28
461	580	37	-28.1	0.117	0.52	30.59	0.0112298	CACAGCTATGGCAGCGGAGGTCACTAGACGTGGGAGTGCATACTATATGTACTTGGACAGAAACGACGCTGGGGAGGCCATATCTTTTCCAACCACATTGGGGATGAATAAGTGTTATAT	....(((....(((((..((((....)))((..(((((((((...)))))))))..)).....)..)))))....)))....((.(((((((.....))))))).)).............	............((((.................(((((((((...)))))))))............))))............((.(((((((.....))))))).)).............	34	34	23	29
462	581	37	-28.1	-0.06	0.43	30.99	0.0160847	ACAGCTATGGCAGCGGAGGTCACTAGACGTGGGAGTGCATACTATATGTACTTGGACAGAAACGACGCTGGGGAGGCCATATCTTTTCCAACCACATTGGGGATGAATAAGTGTTATATA	...(((....(((((..((((....)))((..(((((((((...)))))))))..)).....)..)))))....)))....((.(((((((.....))))))).))..............	............(((.................(((((((((...)))))))))............))).............((.(((((((.....))))))).))..............	35	34	22	29
463	582	37	-28.1	0.22	0.5	31	0.0153827	CAGCTATGGCAGCGGAGGTCACTAGACGTGGGAGTGCATACTATATGTACTTGGACAGAAACGACGCTGGGGAGGCCATATCTTTTCCAACCACATTGGGGATGAATAAGTGTTATATAC	..(((....(((((..((((....)))((..(((((((((...)))))))))..)).....)..)))))....)))....((.(((((((.....))))))).))...............	...........(((.................(((((((((...)))))))))............))).............((.(((((((.....))))))).))...............	34	34	23	29
464	583	37	-28.3	-0.02	0.5	28.99	0.0126011	AGCTATGGCAGCGGAGGTCACTAGACGTGGGAGTGCATACTATATGTACTTGGACAGAAACGACGCTGGGGAGGCCATATCTTTTCCAACCACATTGGGGATGAATAAGTGTTATATACA	.(((....(((((..((((....)))((..(((((((((...)))))))))..)).....)..)))))....)))....((.(((((((.....))))))).))....((((...)))).	.........((((..(..............(((((((((...))))))))).........)..))))............((.(((((((.....))))))).))................	35	34	22	29
465	584	37	-28.3	0.251	0.64	29.41	0.0125129	GCTATGGCAGCGGAGGTCACTAGACGTGGGAGTGCATACTATATGTACTTGGACAGAAACGACGCTGGGGAGGCCATATCTTTTCCAACCACATTGGGGATGAATAAGTGTTATATACAG	..((((((((((..((((....)))((..(((((((((...)))))))))..)).....)..))))......))))))((.(((((((.....))))))).))....((((...))))..	........((((.................(((((((((...)))))))))............))))............((.(((((((.....))))))).)).................	34	35	22	29
466	585	37	-28.3	-0.33	0.31	29.26	0.0187071	CTATGGCAGCGGAGGTCACTAGACGTGGGAGTGCATACTATATGTACTTGGACAGAAACGACGCTGGGGAGGCCATATCTTTTCCAACCACATTGGGGATGAATAAGTGTTATATACAGA	.((((((((((..((((....)))((..(((((((((...)))))))))..)).....)..))))......))))))((.(((((((.....))))))).))....((((...))))...	.((((((.....................(((((((((...)))))))))......................))))))((.(((((((.....))))))).))..................	35	34	22	29
467	586	37	-28.1	-0.18	0.41	29.04	0.0171637	TATGGCAGCGGAGGTCACTAGACGTGGGAGTGCATACTATATGTACTTGGACAGAAACGACGCTGGGGAGGCCATATCTTTTCCAACCACATTGGGGATGAATAAGTGTTATATACAGAT	((((((((((..((((....)))((..(((((((((...)))))))))..)).....)..))))......))))))((.(((((((.....))))))).))....((((...))))....	((((((.....................(((((((((...)))))))))......................))))))((.(((((((.....))))))).))...................	35	34	21	30
468	587	37	-26.9	0.267	0.56	27.62	0.0118321	ATGGCAGCGGAGGTCACTAGACGTGGGAGTGCATACTATATGTACTTGGACAGAAACGACGCTGGGGAGGCCATATCTTTTCCAACCACATTGGGGATGAATAAGTGTTATATACAGATC	(((((((((..((((....)))((..(((((((((...)))))))))..)).....)..))))......))))).((.(((((((.....))))))).))....((((...)))).....	..((.((((..(..............(((((((((...))))))))).........)..)))).......))...((.(((((((.....))))))).))....................	35	34	22	29
469	588	37	-26.8	0.171	0.54	24.2	0.020449	TGGCAGCGGAGGTCACTAGACGTGGGAGTGCATACTATATGTACTTGGACAGAAACGACGCTGGGGAGGCCATATCTTTTCCAACCACATTGGGGATGAATAAGTGTTATATACAGATCA	...(((((..((((....)))((..(((((((((...)))))))))..)).....)..)))))..((.((....((.(((((((.....))))))).))....)).))............	...(((((..((((....)))....(((((((((...))))))))).........)..)))))...........((.(((((((.....))))))).)).....................	35	34	22	29
470	589	37	-26.8	0.218	0.62	23.18	0.0235849	GGCAGCGGAGGTCACTAGACGTGGGAGTGCATACTATATGTACTTGGACAGAAACGACGCTGGGGAGGCCATATCTTTTCCAACCACATTGGGGATGAATAAGTGTTATATACAGATCAT	..(((((..((((....)))((..(((((((((...)))))))))..)).....)..)))))..((.((....((.(((((((.....))))))).))....)).)).............	..(((((..((((....)))(...(((((((((...)))))))))...).....)..)))))...........((.(((((((.....))))))).))......................	35	34	22	29
471	590	37	-26.8	0.244	0.54	24.2	0.0226543	GCAGCGGAGGTCACTAGACGTGGGAGTGCATACTATATGTACTTGGACAGAAACGACGCTGGGGAGGCCATATCTTTTCCAACCACATTGGGGATGAATAAGTGTTATATACAGATCATG	.(((((..((((....)))((..(((((((((...)))))))))..)).....)..)))))..((.((....((.(((((((.....))))))).))....)).))..............	.(((((..((((....)))(...(((((((((...)))))))))...).....)..)))))............(.(((((((.....))))))).)........................	35	34	22	29
472	591	37	-26.8	0.481	0.62	25.13	0.016892	CAGCGGAGGTCACTAGACGTGGGAGTGCATACTATATGTACTTGGACAGAAACGACGCTGGGGAGGCCATATCTTTTCCAACCACATTGGGGATGAATAAGTGTTATATACAGATCATGG	(((((..((((....)))((..(((((((((...)))))))))..)).....)..)))))......(((((((((((((((.....))))))).......((((...)))))))).))))	(((((..((((....)))((..(((((((((...)))))))))..)).....)..)))))..............(((((((.....)))))))...........................	35	34	22	29
473	592	37	-25.8	0.336	0.52	29.91	0.0200431	AGCGGAGGTCACTAGACGTGGGAGTGCATACTATATGTACTTGGACAGAAACGACGCTGGGGAGGCCATATCTTTTCCAACCACATTGGGGATGAATAAGTGTTATATACAGATCATGGA	......((((.((((.(((.((((((((((...))))))))).........).)))))))...))))...((.(((((((.....))))))).))....((((...))))..........	......(((..((((.(((.((((((((((...))))))))).........).)))))))....)))......(((((((.....)))))))............................	36	34	21	29
474	593	37	-25.8	0.308	0.58	26.65	0.022376	GCGGAGGTCACTAGACGTGGGAGTGCATACTATATGTACTTGGACAGAAACGACGCTGGGGAGGCCATATCTTTTCCAACCACATTGGGGATGAATAAGTGTTATATACAGATCATGGAT	.....((((.((((.(((.((((((((((...))))))))).........).)))))))...))))...((.(((((((.....))))))).))....((((...))))...........	.....((((.((((.(((.((((((((((...))))))))).........).)))))))...))))....(.(((((((.....))))))).)...........................	35	34	21	30
475	594	37	-26.5	0.269	0.54	17.19	0.0382748	CGGAGGTCACTAGACGTGGGAGTGCATACTATATGTACTTGGACAGAAACGACGCTGGGGAGGCCATATCTTTTCCAACCACATTGGGGATGAATAAGTGTTATATACAGATCATGGATC	....((((.((((.(((.((((((((((...))))))))).........).)))))))...))))...((.(((((((.....))))))).))....((((...)))).((((...))))	....((((.((((.(((.((((((((((...))))))))).........).)))))))...))))...((.(((((((.....))))))).))................((((...))))	35	33	22	30
476	595	37	-28.2	-0.3	0.35	12.72	0.064327	GGAGGTCACTAGACGTGGGAGTGCATACTATATGTACTTGGACAGAAACGACGCTGGGGAGGCCATATCTTTTCCAACCACATTGGGGATGAATAAGTGTTATATACAGATCATGGATCT	...((((.((((.(((.((((((((((...))))))))).........).)))))))...))))...((.(((((((.....))))))).))....((((...))))(((((...)))))	...((((.((((.(((.((((((((((...))))))))).........).)))))))...))))...((.(((((((.....))))))).))....(((.....)))(((((...)))))	35	33	21	31
477	596	37	-28.5	-0.57	0.29	14.89	0.0762485	GAGGTCACTAGACGTGGGAGTGCATACTATATGTACTTGGACAGAAACGACGCTGGGGAGGCCATATCTTTTCCAACCACATTGGGGATGAATAAGTGTTATATACAGATCATGGATCTT	..((((.((((.(((.((((((((((...))))))))).........).)))))))...))))...((.(((((((.....))))))).))....((((...))))(((((...))))).	..((((.((((.(((.((((((((((...))))))))).........).)))))))...))))...((.(((((((.....))))))).))....(((.....)))(((((...))))).	35	32	21	32
478	597	37	-28.5	-0.54	0.29	11.99	0.0774403	AGGTCACTAGACGTGGGAGTGCATACTATATGTACTTGGACAGAAACGACGCTGGGGAGGCCATATCTTTTCCAACCACATTGGGGATGAATAAGTGTTATATACAGATCATGGATCTTG	.((((.((((.(((.((((((((((...))))))))).........).)))))))...))))...((.(((((((.....))))))).))....((((...))))(((((...)))))..	.((((.((((.(((.((((((((((...))))))))).........).)))))))...))))...((.(((((((.....))))))).))...............(((((...)))))..	35	32	21	32
479	598	37	-28.7	-0.55	0.27	11.1	0.0585762	GGTCACTAGACGTGGGAGTGCATACTATATGTACTTGGACAGAAACGACGCTGGGGAGGCCATATCTTTTCCAACCACATTGGGGATGAATAAGTGTTATATACAGATCATGGATCTTGG	((((.((((.(((.((((((((((...))))))))).........).)))))))...))))...((.(((((((.....))))))).))....((((...))))(((((...)))))...	((((.((((.(((.((((((((((...))))))))).........).)))))))...))))...((.(((((((.....))))))).))...............(((((...)))))...	34	33	21	32
480	599	37	-26.3	0.231	0.54	36.2	0.0195547	GTCACTAGACGTGGGAGTGCATACTATATGTACTTGGACAGAAACGACGCTGGGGAGGCCATATCTTTTCCAACCACATTGGGGATGAATAAGTGTTATATACAGATCATGGATCTTGGA	....((((.(((.((((((((((...))))))))).........).))))))).(((((((((((((((((((.....))))))).......((((...)))))))).)))).))))...	....((((.(((.((((((((((...))))))))).........).))))))).............((((((.......))))))...................................	35	32	21	32
481	600	37	-26.3	0	0.49	25.88	0.0304001	TCACTAGACGTGGGAGTGCATACTATATGTACTTGGACAGAAACGACGCTGGGGAGGCCATATCTTTTCCAACCACATTGGGGATGAATAAGTGTTATATACAGATCATGGATCTTGGAC	...((((.(((.((((((((((...))))))))).........).))))))).(((((((((((((((((((.....))))))).......((((...)))))))).)))).))))....	...((((.(((.((((((((((...))))))))).........).))))))).....((((....(((((((.....))))))).......................)))).........	35	31	22	32
482	601	37	-26.3	0.112	0.47	24.4	0.0418951	CACTAGACGTGGGAGTGCATACTATATGTACTTGGACAGAAACGACGCTGGGGAGGCCATATCTTTTCCAACCACATTGGGGATGAATAAGTGTTATATACAGATCATGGATCTTGGACA	..((((.(((.((((((((((...))))))))).........).))))))).(((((((((((((((((((.....))))))).......((((...)))))))).)))).)))).....	..((((.(((.((((((((((...))))))))).........).)))))))..((((((((((.(((((((.....)))))))........(.......)..))).)))).)))......	36	31	22	31
483	602	37	-26.3	-0.16	0.43	29.45	0.0313522	ACTAGACGTGGGAGTGCATACTATATGTACTTGGACAGAAACGACGCTGGGGAGGCCATATCTTTTCCAACCACATTGGGGATGAATAAGTGTTATATACAGATCATGGATCTTGGACAC	.((((.(((.((((((((((...))))))))).........).))))))).(((((((((((((((((((.....))))))).......((((...)))))))).)))).))))......	.((((.(((.((((((((((...))))))))).........).))))))).............(((((((.....)))))))...................((((...))))........	36	31	22	31
484	603	37	-27	0.055	0.6	26.2	0.0352543	CTAGACGTGGGAGTGCATACTATATGTACTTGGACAGAAACGACGCTGGGGAGGCCATATCTTTTCCAACCACATTGGGGATGAATAAGTGTTATATACAGATCATGGATCTTGGACACA	((((.(((.((((((((((...))))))))).........).)))))))..........((.(((((((.....))))))).))....(((((......(((((...)))))..))))).	((((.(((.((((((((((...))))))))).........).))))))).............((((((.......)))))).......(((((......(((((...)))))..))))).	36	31	22	31
485	604	37	-25.7	-0.12	0.41	26.33	0.028472	TAGACGTGGGAGTGCATACTATATGTACTTGGACAGAAACGACGCTGGGGAGGCCATATCTTTTCCAACCACATTGGGGATGAATAAGTGTTATATACAGATCATGGATCTTGGACACAT	.....(((((((((((((...)))))))))...............((((((((......)))))))).))))...............(((((......(((((...)))))..)))))..	.........(((((((((...))))))))).........................................................(((((......(((((...)))))..)))))..	36	31	21	32
486	605	37	-25.7	0.385	0.66	27.37	0.0296707	AGACGTGGGAGTGCATACTATATGTACTTGGACAGAAACGACGCTGGGGAGGCCATATCTTTTCCAACCACATTGGGGATGAATAAGTGTTATATACAGATCATGGATCTTGGACACATG	....(((((((((((((...)))))))))...............((((((((......)))))))).))))...............(((((......(((((...)))))..)))))...	........(((((((((...)))))))))................(((((((......))))))).....................(((((......(((((...)))))..)))))...	36	32	21	31
487	606	37	-25.7	0.46	0.66	31.4	0.0112046	GACGTGGGAGTGCATACTATATGTACTTGGACAGAAACGACGCTGGGGAGGCCATATCTTTTCCAACCACATTGGGGATGAATAAGTGTTATATACAGATCATGGATCTTGGACACATGT	...(((((((((((((...)))))))))...............((((((((......)))))))).))))...............(((((......(((((...)))))..)))))....	..((((.(((((((((...)))))))))..................................((.........)).....................(((((...)))))......)))).	35	32	21	32
488	607	37	-26	0.104	0.52	31.53	0.0122656	ACGTGGGAGTGCATACTATATGTACTTGGACAGAAACGACGCTGGGGAGGCCATATCTTTTCCAACCACATTGGGGATGAATAAGTGTTATATACAGATCATGGATCTTGGACACATGTG	..(((((((((((((...)))))))))...............((((((((......)))))))).))))...........(((.(((((......(((((...)))))..))))).))).	(((((.(((((((((...)))))))))..................................((.........)).....................(((((...)))))......))))).	35	32	21	32
489	608	37	-26	0.368	0.52	27.99	0.0189602	CGTGGGAGTGCATACTATATGTACTTGGACAGAAACGACGCTGGGGAGGCCATATCTTTTCCAACCACATTGGGGATGAATAAGTGTTATATACAGATCATGGATCTTGGACACATGTGT	.(((((((((((((...)))))))))...............((((((((......)))))))).))))...........(((.(((((......(((((...)))))..))))).)))..	.....(((((((((...)))))))))................(((((((......))))))).....................(((((......(((((...)))))..)))))......	34	32	21	33
490	609	37	-26.2	0.367	0.56	28.64	0.0128796	GTGGGAGTGCATACTATATGTACTTGGACAGAAACGACGCTGGGGAGGCCATATCTTTTCCAACCACATTGGGGATGAATAAGTGTTATATACAGATCATGGATCTTGGACACATGTGTG	(((((((((((((...)))))))))...............((((((((......)))))))).))))...........(((.(((((......(((((...)))))..))))).)))...	(...(((((((((...)))))))))...)............(((((((......))))))).....................(((((......(((((...)))))..))))).......	34	33	20	33
491	610	37	-25	0.213	0.49	29.02	0.0113436	TGGGAGTGCATACTATATGTACTTGGACAGAAACGACGCTGGGGAGGCCATATCTTTTCCAACCACATTGGGGATGAATAAGTGTTATATACAGATCATGGATCTTGGACACATGTGTGA	...(((((((((...)))))))))...........(((((((.....)))..((.(((((((.....))))))).))....(((((......(((((...)))))..)))))..))))..	...(((((((((...)))))))))...........((((..................((((.......)))).........(((((......(((((...)))))..)))))..))))..	35	32	20	33
492	611	37	-25	0.104	0.52	28.8	0.0131654	GGGAGTGCATACTATATGTACTTGGACAGAAACGACGCTGGGGAGGCCATATCTTTTCCAACCACATTGGGGATGAATAAGTGTTATATACAGATCATGGATCTTGGACACATGTGTGAT	..(((((((((...)))))))))...........(((((((.....)))..((.(((((((.....))))))).))....(((((......(((((...)))))..)))))..))))...	..(((((((((...)))))))))...........((((..................((((.......)))).........(((((......(((((...)))))..)))))..))))...	35	32	20	33
493	612	37	-25	0.399	0.68	29.77	0.0118755	GGAGTGCATACTATATGTACTTGGACAGAAACGACGCTGGGGAGGCCATATCTTTTCCAACCACATTGGGGATGAATAAGTGTTATATACAGATCATGGATCTTGGACACATGTGTGATG	.(((((((((...)))))))))...........(((((((.....)))..((.(((((((.....))))))).))....(((((......(((((...)))))..)))))..))))....	.(((((((((...)))))))))...........((((..................((((.......)))).........(((((......(((((...)))))..)))))..))))....	35	32	20	33
494	613	37	-24.9	0.362	0.58	32.09	0.00953419	GAGTGCATACTATATGTACTTGGACAGAAACGACGCTGGGGAGGCCATATCTTTTCCAACCACATTGGGGATGAATAAGTGTTATATACAGATCATGGATCTTGGACACATGTGTGATGC	(((((((((...)))))))))...........(((((((.....)))..((.(((((((.....))))))).))....(((((......(((((...)))))..)))))..)))).....	(((((((((...)))))))))................................(((((.......)))))........(((((......(((((...)))))..)))))...........	35	31	21	33
495	614	37	-23.4	0.762	0.72	41.48	0.00319148	AGTGCATACTATATGTACTTGGACAGAAACGACGCTGGGGAGGCCATATCTTTTCCAACCACATTGGGGATGAATAAGTGTTATATACAGATCATGGATCTTGGACACATGTGTGATGCC	.((((((((..((((..(((...(((........)))..)))..))))((.(((((((.....))))))).))....(((((......(((((...)))))..)))))..))))).))).	((((((((...))))))))..................................((((.......)))).........(((((......(((((...)))))..)))))............	35	30	22	33
496	615	37	-24.5	0.338	0.66	36.62	0.00470222	GTGCATACTATATGTACTTGGACAGAAACGACGCTGGGGAGGCCATATCTTTTCCAACCACATTGGGGATGAATAAGTGTTATATACAGATCATGGATCTTGGACACATGTGTGATGCCA	(((((((...))))))).(((.((......(((((((.....)))..((.(((((((.....))))))).))....(((((......(((((...)))))..)))))..))))..)))))	(((((((...)))))))..((.((....................................................(((((......(((((...)))))..)))))........)))).	35	30	22	33
497	616	37	-22.8	1.131	0.86	42.1	0.00571815	TGCATACTATATGTACTTGGACAGAAACGACGCTGGGGAGGCCATATCTTTTCCAACCACATTGGGGATGAATAAGTGTTATATACAGATCATGGATCTTGGACACATGTGTGATGCCAC	..(((((..((((..(((...(((........)))..)))..))))((.(((((((.....))))))).))....(((((......(((((...)))))..)))))..))))).......	.((((...(((((..................................(.(((((((.....))))))).)................(((((...)))))......)))))...))))...	35	29	23	33
498	617	37	-22.8	1.2	0.92	39.97	0.00653896	GCATACTATATGTACTTGGACAGAAACGACGCTGGGGAGGCCATATCTTTTCCAACCACATTGGGGATGAATAAGTGTTATATACAGATCATGGATCTTGGACACATGTGTGATGCCACC	.(((((..((((..(((...(((........)))..)))..))))((.(((((((.....))))))).))....(((((......(((((...)))))..)))))..)))))........	((((...(((((..................................(.(((((((.....))))))).)................(((((...)))))......)))))...))))....	35	29	24	32
499	618	37	-22.6	0.871	0.76	36.81	0.0308946	CATACTATATGTACTTGGACAGAAACGACGCTGGGGAGGCCATATCTTTTCCAACCACATTGGGGATGAATAAGTGTTATATACAGATCATGGATCTTGGACACATGTGTGATGCCACCA	(((((..((((..(((...(((........)))..)))..))))((.(((((((.....))))))).))....(((((......(((((...)))))..)))))..))))).........	...................(((........)))..............((((((.......)))))).......(((((......(((((...)))))..)))))................	36	28	24	32
500	619	37	-22	0.863	0.8	38.45	0.0145799	ATACTATATGTACTTGGACAGAAACGACGCTGGGGAGGCCATATCTTTTCCAACCACATTGGGGATGAATAAGTGTTATATACAGATCATGGATCTTGGACACATGTGTGATGCCACCAT	......((((..(((...(((........)))..)))..))))((.(((((((.....))))))).))....(((((......(((((...)))))..)))))(((.(((....))))))	........................................................................(((((......(((((...)))))..))))).................	36	28	23	33
501	620	37	-22.5	1.184	0.9	43.05	0.0168804	TACTATATGTACTTGGACAGAAACGACGCTGGGGAGGCCATATCTTTTCCAACCACATTGGGGATGAATAAGTGTTATATACAGATCATGGATCTTGGACACATGTGTGATGCCACCATG	.....((((..(((...(((........)))..)))..))))((.(((((((.....))))))).))....(((((......(((((...)))))..)))))(((.(((....)))))).	..................((........)).................((((.......)))).........(((((......(((((...)))))..)))))..................	35	29	23	33
502	621	37	-22.9	0.551	0.64	44.42	0.00807237	ACTATATGTACTTGGACAGAAACGACGCTGGGGAGGCCATATCTTTTCCAACCACATTGGGGATGAATAAGTGTTATATACAGATCATGGATCTTGGACACATGTGTGATGCCACCATGA	....((((..(((...(((........)))..)))..))))((.(((((((.....))))))).))....((((...))))...((((((....(((.(((....)))...)))))))))	..............................................((((.......)))).......................((((((....(((.(((....)))...)))))))))	36	29	23	32
503	622	37	-23.4	0.955	0.82	41	0.0111909	CTATATGTACTTGGACAGAAACGACGCTGGGGAGGCCATATCTTTTCCAACCACATTGGGGATGAATAAGTGTTATATACAGATCATGGATCTTGGACACATGTGTGATGCCACCATGAG	...((((..(((...(((........)))..)))..))))((.(((((((.....))))))).))....((((...))))...((((((....(((.(((....)))...))))))))).	............................................(((((.......)))))......................((((((....(((.(((....)))...))))))))).	35	30	23	32
504	623	37	-23.4	0.805	0.76	41.94	0.0121579	TATATGTACTTGGACAGAAACGACGCTGGGGAGGCCATATCTTTTCCAACCACATTGGGGATGAATAAGTGTTATATACAGATCATGGATCTTGGACACATGTGTGATGCCACCATGAGC	..((((..(((...(((........)))..)))..))))((.(((((((.....))))))).))....((((...))))...((((((....(((.(((....)))...)))))))))..	..............(((........)))..............((((((.......)))))).....................((((((....(((.(((....)))...)))))))))..	35	30	23	32
505	624	37	-23.8	0.878	0.76	40.41	0.0135014	ATATGTACTTGGACAGAAACGACGCTGGGGAGGCCATATCTTTTCCAACCACATTGGGGATGAATAAGTGTTATATACAGATCATGGATCTTGGACACATGTGTGATGCCACCATGAGCT	.((((..(((...(((........)))..)))..))))((.(((((((.....))))))).))....((((...))))((.((((((....(((.(((....)))...))))))))).))	.......................................(.(((((((.....))))))).)...................((((((....(((.(((....)))...)))))))))...	35	30	23	32
506	625	37	-24.3	0.625	0.74	38.45	0.0283246	TATGTACTTGGACAGAAACGACGCTGGGGAGGCCATATCTTTTCCAACCACATTGGGGATGAATAAGTGTTATATACAGATCATGGATCTTGGACACATGTGTGATGCCACCATGAGCTA	((((..(((...(((........)))..)))..))))((.(((((((.....))))))).))....((((...))))((.((((((....(((.(((....)))...))))))))).)).	.....................................((.(((((((.....))))))).))................(.((((((....(((.(((....)))...))))))))).)..	35	30	23	32
507	626	37	-23.1	0.73	0.74	41.39	0.00722646	ATGTACTTGGACAGAAACGACGCTGGGGAGGCCATATCTTTTCCAACCACATTGGGGATGAATAAGTGTTATATACAGATCATGGATCTTGGACACATGTGTGATGCCACCATGAGCTAT	(((..(((...(((........)))..)))..))).((.(((((((.....))))))).))....((((...))))((.((((((....(((.(((....)))...))))))))).))..	.....................................(.(((((((.....))))))).).................((((...))))................................	35	30	23	32
508	627	37	-22.8	1.275	0.9	41.25	0.00453479	TGTACTTGGACAGAAACGACGCTGGGGAGGCCATATCTTTTCCAACCACATTGGGGATGAATAAGTGTTATATACAGATCATGGATCTTGGACACATGTGTGATGCCACCATGAGCTATG	....................(((.(((.(((((((((.(((((((.....))))))).).....(((((......(((((...)))))..)))))..)))))..))).)).).)))....	....................................(.(((((((.....))))))).).................((((...)))).................................	34	31	23	32
509	628	37	-22.8	1.041	0.76	44.29	0.00446055	GTACTTGGACAGAAACGACGCTGGGGAGGCCATATCTTTTCCAACCACATTGGGGATGAATAAGTGTTATATACAGATCATGGATCTTGGACACATGTGTGATGCCACCATGAGCTATGA	...................(((.(((.(((((((((.(((((((.....))))))).).....(((((......(((((...)))))..)))))..)))))..))).)).).))).....	...................................(.(((((((.....))))))).)..............................................................	35	31	23	31
510	629	37	-22.8	0.848	0.8	44.8	0.00490629	TACTTGGACAGAAACGACGCTGGGGAGGCCATATCTTTTCCAACCACATTGGGGATGAATAAGTGTTATATACAGATCATGGATCTTGGACACATGTGTGATGCCACCATGAGCTATGAA	..................(((.(((.(((((((((.(((((((.....))))))).).....(((((......(((((...)))))..)))))..)))))..))).)).).)))......	..................................(.(((((((.....))))))).)...............................................................	36	30	23	31
511	630	37	-22.8	1.058	0.82	42.35	0.00567012	ACTTGGACAGAAACGACGCTGGGGAGGCCATATCTTTTCCAACCACATTGGGGATGAATAAGTGTTATATACAGATCATGGATCTTGGACACATGTGTGATGCCACCATGAGCTATGAAT	.................(((.(((.(((((((((.(((((((.....))))))).).....(((((......(((((...)))))..)))))..)))))..))).)).).))).......	.................................(.(((((((.....))))))).)................................................................	36	30	23	31
512	631	37	-22.8	1.195	0.9	41.85	0.00534177	CTTGGACAGAAACGACGCTGGGGAGGCCATATCTTTTCCAACCACATTGGGGATGAATAAGTGTTATATACAGATCATGGATCTTGGACACATGTGTGATGCCACCATGAGCTATGAATG	................(((.(((.(((((((((.(((((((.....))))))).).....(((((......(((((...)))))..)))))..)))))..))).)).).)))........	................................(.(((((((.....))))))).).................................................................	35	31	23	31
513	632	37	-23.1	1.159	0.86	42.21	0.00789449	TTGGACAGAAACGACGCTGGGGAGGCCATATCTTTTCCAACCACATTGGGGATGAATAAGTGTTATATACAGATCATGGATCTTGGACACATGTGTGATGCCACCATGAGCTATGAATGC	............((((((.((....))...((.(((((((.....))))))).))...)))))).....((..((((((.((.(((...(((.....)))...))).)).)))))).)).	.............((((..............(.(((((((.....))))))).).....)))).........................................................	35	31	23	31
514	633	37	-23.1	1.603	0.94	43.69	0.00573154	TGGACAGAAACGACGCTGGGGAGGCCATATCTTTTCCAACCACATTGGGGATGAATAAGTGTTATATACAGATCATGGATCTTGGACACATGTGTGATGCCACCATGAGCTATGAATGCC	...........((((((.((....))...((.(((((((.....))))))).))...)))))).....((..((((((.((.(((...(((.....)))...))).)).)))))).))..	..............................(.(((((((.....))))))).)...................................................................	35	31	24	30
515	634	37	-23.4	1.16	0.86	44.7	0.00399151	GGACAGAAACGACGCTGGGGAGGCCATATCTTTTCCAACCACATTGGGGATGAATAAGTGTTATATACAGATCATGGATCTTGGACACATGTGTGATGCCACCATGAGCTATGAATGCCC	((.((........(((.(((.(((((((((.(((((((.....))))))).).....(((((......(((((...)))))..)))))..)))))..))).)).).)))......)))).	.............................(.(((((((.....))))))).)....................................................................	35	31	25	29
516	635	37	-23.9	0.861	0.72	43.66	0.0082159	GACAGAAACGACGCTGGGGAGGCCATATCTTTTCCAACCACATTGGGGATGAATAAGTGTTATATACAGATCATGGATCTTGGACACATGTGTGATGCCACCATGAGCTATGAATGCCCT	..............((((((((......))))))))........(((.((..(((.((............((((((....(((.(((....)))...))))))))))))))..)).))).	............................(.((((((.......)))))).)....................(((((....(((..............))))))))...............	35	30	25	30
517	636	37	-23.9	0.496	0.68	43.25	0.00514977	ACAGAAACGACGCTGGGGAGGCCATATCTTTTCCAACCACATTGGGGATGAATAAGTGTTATATACAGATCATGGATCTTGGACACATGTGTGATGCCACCATGAGCTATGAATGCCCTA	.............((((((((......))))))))........(((.((..(((.((............((((((....(((.(((....)))...))))))))))))))..)).)))..	...........................(.(((((((.....))))))).)....................(((((....(((..............))))))))................	36	29	25	30
518	637	37	-24.2	0.693	0.66	42.48	0.00646491	CAGAAACGACGCTGGGGAGGCCATATCTTTTCCAACCACATTGGGGATGAATAAGTGTTATATACAGATCATGGATCTTGGACACATGTGTGATGCCACCATGAGCTATGAATGCCCTAT	............(((((....((((((.(((((((.....))))))).))....((((...))))...((((((....(((.(((....)))...)))))))))..))))....))))).	..........................(.((((((.......)))))).)....................(((((....(((..............)))))))).................	35	29	25	31
519	638	37	-25.2	0.513	0.68	37.87	0.0137253	AGAAACGACGCTGGGGAGGCCATATCTTTTCCAACCACATTGGGGATGAATAAGTGTTATATACAGATCATGGATCTTGGACACATGTGTGATGCCACCATGAGCTATGAATGCCCTATG	...........((((((((......))))))))....(((.(((.((..(((.((............((((((....(((.(((....)))...))))))))))))))..)).))).)))	...........((((((((......))))))))....((..(((.((....................((((((....(((.(((....)))...))))))))).......)).)))..))	35	30	24	31
520	639	37	-25.9	0.489	0.66	40.89	0.00972446	GAAACGACGCTGGGGAGGCCATATCTTTTCCAACCACATTGGGGATGAATAAGTGTTATATACAGATCATGGATCTTGGACACATGTGTGATGCCACCATGAGCTATGAATGCCCTATGC	........(((((((....((((((.(((((((.....))))))).))....((((...))))...((((((....(((.(((....)))...)))))))))..))))....))))).))	........(((((((...........((((((.......)))))).....................((((((....(((.(((....)))...)))))))))..........))))).))	34	30	25	31
521	640	37	-27	0.042	0.37	33.13	0.01609	AAACGACGCTGGGGAGGCCATATCTTTTCCAACCACATTGGGGATGAATAAGTGTTATATACAGATCATGGATCTTGGACACATGTGTGATGCCACCATGAGCTATGAATGCCCTATGCT	.......(((((((....((((((.(((((((.....))))))).))....((((...))))...((((((....(((.(((....)))...)))))))))..))))....))))).)).	.......(((((((....(((.((.(((((((.....))))))).))..................((((((....(((.(((....)))...)))))))))...)))....))))).)).	34	29	25	32
522	641	37	-27	0.274	0.5	35.32	0.0143838	AACGACGCTGGGGAGGCCATATCTTTTCCAACCACATTGGGGATGAATAAGTGTTATATACAGATCATGGATCTTGGACACATGTGTGATGCCACCATGAGCTATGAATGCCCTATGCTG	......(((((((....((((((.(((((((.....))))))).))....((((...))))...((((((....(((.(((....)))...)))))))))..))))....))))).))..	......(((((((....(((.((.(((((((.....))))))).))..................((((((....(((.(((....)))...)))))))))...)))....))))).))..	33	30	25	32
523	642	37	-29	-0.13	0.35	28.71	0.0291114	ACGACGCTGGGGAGGCCATATCTTTTCCAACCACATTGGGGATGAATAAGTGTTATATACAGATCATGGATCTTGGACACATGTGTGATGCCACCATGAGCTATGAATGCCCTATGCTGG	.......((((((((......)))))))).((((((.(((.((..(((.((............((((((....(((.(((....)))...))))))))))))))..)).))).))).)))	.......((((((((......)))))))).((((((.(((.((..((................((((((....(((.(((....)))...)))))))))...))..)).))).))).)))	32	31	25	32
524	643	37	-29.6	-0.43	0.29	25.59	0.0314695	CGACGCTGGGGAGGCCATATCTTTTCCAACCACATTGGGGATGAATAAGTGTTATATACAGATCATGGATCTTGGACACATGTGTGATGCCACCATGAGCTATGAATGCCCTATGCTGGA	......((((((((......)))))))).((((((.(((.((..(((.((............((((((....(((.(((....)))...))))))))))))))..)).))).))).))).	......((((((((......)))))))).((((((.(((.((..((................((((((....(((.(((....)))...)))))))))...))..)).))).))).))).	32	31	25	32
525	644	37	-29.6	-0.22	0.37	24.74	0.0315453	GACGCTGGGGAGGCCATATCTTTTCCAACCACATTGGGGATGAATAAGTGTTATATACAGATCATGGATCTTGGACACATGTGTGATGCCACCATGAGCTATGAATGCCCTATGCTGGAT	.....((((((((......)))))))).((((((.(((.((..(((.((............((((((....(((.(((....)))...))))))))))))))..)).))).))).)))..	.....((((((((......)))))))).((((((.(((.((..((................((((((....(((.(((....)))...)))))))))...))..)).))).))).)))..	32	31	24	33
526	645	37	-29.6	-0.65	0.25	24.76	0.030682	ACGCTGGGGAGGCCATATCTTTTCCAACCACATTGGGGATGAATAAGTGTTATATACAGATCATGGATCTTGGACACATGTGTGATGCCACCATGAGCTATGAATGCCCTATGCTGGATG	....((((((((......)))))))).((((((.(((.((..(((.((............((((((....(((.(((....)))...))))))))))))))..)).))).))).)))...	....((((((((......)))))))).((((((.(((.((..((................((((((....(((.(((....)))...)))))))))...))..)).))).))).)))...	32	31	24	33
527	646	37	-29.6	-0.47	0.21	25.03	0.030155	CGCTGGGGAGGCCATATCTTTTCCAACCACATTGGGGATGAATAAGTGTTATATACAGATCATGGATCTTGGACACATGTGTGATGCCACCATGAGCTATGAATGCCCTATGCTGGATGA	...((((((((......)))))))).((((((.(((.((..(((.((............((((((....(((.(((....)))...))))))))))))))..)).))).))).)))....	...((((((((......)))))))).((((((.(((.((..((................((((((....(((.(((....)))...)))))))))...))..)).))).))).)))....	32	31	24	33
528	647	37	-29.6	-0.52	0.25	24.45	0.0304962	GCTGGGGAGGCCATATCTTTTCCAACCACATTGGGGATGAATAAGTGTTATATACAGATCATGGATCTTGGACACATGTGTGATGCCACCATGAGCTATGAATGCCCTATGCTGGATGAG	..((((((((......)))))))).((((((.(((.((..(((.((............((((((....(((.(((....)))...))))))))))))))..)).))).))).))).....	..((((((((......)))))))).((((((.(((.((..((................((((((....(((.(((....)))...)))))))))...))..)).))).))).))).....	32	32	23	33
529	648	37	-29.6	-0.57	0.27	25.46	0.0292722	CTGGGGAGGCCATATCTTTTCCAACCACATTGGGGATGAATAAGTGTTATATACAGATCATGGATCTTGGACACATGTGTGATGCCACCATGAGCTATGAATGCCCTATGCTGGATGAGG	.((((((((......)))))))).((((((.(((.((..(((.((............((((((....(((.(((....)))...))))))))))))))..)).))).))).)))......	.((((((((......)))))))).((((((.(((.((..((................((((((....(((.(((....)))...)))))))))...))..)).))).))).)))......	32	32	23	33
530	649	37	-29.4	-0.28	0.37	31.11	0.0227068	TGGGGAGGCCATATCTTTTCCAACCACATTGGGGATGAATAAGTGTTATATACAGATCATGGATCTTGGACACATGTGTGATGCCACCATGAGCTATGAATGCCCTATGCTGGATGAGGG	((((((((......)))))))).((((((.(((.((..(((.((............((((((....(((.(((....)))...))))))))))))))..)).))).))).))).......	((((((((......)))))))).((((((.(((.((..((................((((((....(((.(((....)))...)))))))))...))..)).))).))).))).......	32	33	22	33
531	650	37	-28.7	-0.2	0.43	35.57	0.0200103	GGGGAGGCCATATCTTTTCCAACCACATTGGGGATGAATAAGTGTTATATACAGATCATGGATCTTGGACACATGTGTGATGCCACCATGAGCTATGAATGCCCTATGCTGGATGAGGGG	(((((((......)))))))..((((((.(((.((..(((.((............((((((....(((.(((....)))...))))))))))))))..)).))).))).)))........	(((((((......)))))))..((((((.(((.((..((................((((((....(((.(((....)))...)))))))))...))..)).))).))).)))........	32	34	22	32
532	651	37	-28.1	0.383	0.62	28.21	0.0075615	GGGAGGCCATATCTTTTCCAACCACATTGGGGATGAATAAGTGTTATATACAGATCATGGATCTTGGACACATGTGTGATGCCACCATGAGCTATGAATGCCCTATGCTGGATGAGGGGG	((....))....((((((...((((((.(((.((..(((.((............((((((....(((.(((....)))...))))))))))))))..)).))).))).)))..)))))).	((....))....((((((.(.((((((.(((.((..((................((((((....(((.(((....)))...)))))))))...))..)).))).))).))).))))))).	32	34	22	32
533	652	37	-27.6	0.138	0.54	32.98	0.00608114	GGAGGCCATATCTTTTCCAACCACATTGGGGATGAATAAGTGTTATATACAGATCATGGATCTTGGACACATGTGTGATGCCACCATGAGCTATGAATGCCCTATGCTGGATGAGGGGGT	.........((((((((...((((((.(((.((..(((.((............((((((....(((.(((....)))...))))))))))))))..)).))).))).)))..))))))))	.........((((((((...((((((.(((.((..((................((((((....(((.(((....)))...)))))))))...))..)).))).))).)))..))))))))	32	33	22	33
534	653	37	-28.7	-0.08	0.43	28.16	0.0101035	GAGGCCATATCTTTTCCAACCACATTGGGGATGAATAAGTGTTATATACAGATCATGGATCTTGGACACATGTGTGATGCCACCATGAGCTATGAATGCCCTATGCTGGATGAGGGGGTG	.......(((((((((...((((((.(((.((..(((.((............((((((....(((.(((....)))...))))))))))))))..)).))).))).)))..)))))))))	.......(((((((((...((((((.(((.((..((................((((((....(((.(((....)))...)))))))))...))..)).))).))).)))..)))))))))	32	33	22	33
535	654	37	-29	-0.22	0.37	34.28	0.00402718	AGGCCATATCTTTTCCAACCACATTGGGGATGAATAAGTGTTATATACAGATCATGGATCTTGGACACATGTGTGATGCCACCATGAGCTATGAATGCCCTATGCTGGATGAGGGGGTGG	......(((((((((...((((((.(((.((..(((.((............((((((....(((.(((....)))...))))))))))))))..)).))).))).)))..))))))))).	...(((...(((((....((((((.(((.((..((................((((((....(((.(((....)))...)))))))))...))..)).))).))).)))...))))).)))	32	33	22	33
536	655	37	-29.8	-0.5	0.33	34.32	0.00346958	GGCCATATCTTTTCCAACCACATTGGGGATGAATAAGTGTTATATACAGATCATGGATCTTGGACACATGTGTGATGCCACCATGAGCTATGAATGCCCTATGCTGGATGAGGGGGTGGA	..((((.((((.((((....(((.(((.((..(((.((............((((((....(((.(((....)))...))))))))))))))..)).))).))).)))).))))..)))).	..((((..(((((....((((((.(((.((..((................((((((....(((.(((....)))...)))))))))...))..)).))).))).)))...))))))))).	32	33	22	33
537	656	37	-29.8	-0.45	0.19	34.37	0.003466	GCCATATCTTTTCCAACCACATTGGGGATGAATAAGTGTTATATACAGATCATGGATCTTGGACACATGTGTGATGCCACCATGAGCTATGAATGCCCTATGCTGGATGAGGGGGTGGAA	.((((.((((.((((....(((.(((.((..(((.((............((((((....(((.(((....)))...))))))))))))))..)).))).))).)))).))))..))))..	.((((..(((((....((((((.(((.((..((................((((((....(((.(((....)))...)))))))))...))..)).))).))).)))...)))))))))..	33	32	22	33
538	657	37	-29.6	-0.34	0.27	34.45	0.00332443	CCATATCTTTTCCAACCACATTGGGGATGAATAAGTGTTATATACAGATCATGGATCTTGGACACATGTGTGATGCCACCATGAGCTATGAATGCCCTATGCTGGATGAGGGGGTGGAAC	((((.((((.((((....(((.(((.((..(((.((............((((((....(((.(((....)))...))))))))))))))..)).))).))).)))).))))..))))...	((((..(((((....((((((.(((.((..((................((((((....(((.(((....)))...)))))))))...))..)).))).))).)))...)))))))))...	33	31	23	33
539	658	37	-29	-0.06	0.39	27.17	0.00951824	CATATCTTTTCCAACCACATTGGGGATGAATAAGTGTTATATACAGATCATGGATCTTGGACACATGTGTGATGCCACCATGAGCTATGAATGCCCTATGCTGGATGAGGGGGTGGAACC	..(((((((((...((((((.(((.((..(((.((............((((((....(((.(((....)))...))))))))))))))..)).))).))).)))..))))))))).....	..(((((((((.(.((((((.(((.((..((................((((((....(((.(((....)))...)))))))))...))..)).))).))).))).)))))))))).....	33	31	23	33
540	659	37	-29	-0.58	0.29	27.4	0.0121291	ATATCTTTTCCAACCACATTGGGGATGAATAAGTGTTATATACAGATCATGGATCTTGGACACATGTGTGATGCCACCATGAGCTATGAATGCCCTATGCTGGATGAGGGGGTGGAACCA	.(((((((((...((((((.(((.((..(((.((............((((((....(((.(((....)))...))))))))))))))..)).))).))).)))..)))))))))......	.(((((((((.(.((((((.(((.((..((................((((((....(((.(((....)))...)))))))))...))..)).))).))).))).))))))))))......	34	31	22	33
541	660	37	-29.2	-0.46	0.29	26.7	0.013228	TATCTTTTCCAACCACATTGGGGATGAATAAGTGTTATATACAGATCATGGATCTTGGACACATGTGTGATGCCACCATGAGCTATGAATGCCCTATGCTGGATGAGGGGGTGGAACCAG	(((((((((...((((((.(((.((..(((.((............((((((....(((.(((....)))...))))))))))))))..)).))).))).)))..))))))))).......	(((((((((.(.((((((.(((.((..((................((((((....(((.(((....)))...)))))))))...))..)).))).))).))).)))))))))).......	33	32	22	33
542	661	37	-28.1	-0.13	0.45	40.71	0.00810795	ATCTTTTCCAACCACATTGGGGATGAATAAGTGTTATATACAGATCATGGATCTTGGACACATGTGTGATGCCACCATGAGCTATGAATGCCCTATGCTGGATGAGGGGGTGGAACCAGA	((((((((...((((((.(((.((..(((.((............((((((....(((.(((....)))...))))))))))))))..)).))).))).)))..)))))))).........	.((((((....((((((.(((.((..((................((((((....(((.(((....)))...)))))))))...))..)).))).))).)))...))))))..........	34	32	22	32
543	662	37	-28.1	-0.13	0.41	42.79	0.0127495	TCTTTTCCAACCACATTGGGGATGAATAAGTGTTATATACAGATCATGGATCTTGGACACATGTGTGATGCCACCATGAGCTATGAATGCCCTATGCTGGATGAGGGGGTGGAACCAGAT	(((.(((((.((.((((.((.(((.....(((((.((((....((((((....(((.(((....)))...)))))))))..)))))))))..))).)).))))..))..)))))..))).	.....(((.....((((.((.((....................((((((....(((.(((....)))...)))))))))..............)).)).)))).......))).......	33	32	22	33
544	663	37	-27.4	0.344	0.52	41.91	0.0117969	CTTTTCCAACCACATTGGGGATGAATAAGTGTTATATACAGATCATGGATCTTGGACACATGTGTGATGCCACCATGAGCTATGAATGCCCTATGCTGGATGAGGGGGTGGAACCAGATG	...(((((.((.((((.((.(((.....(((((.((((....((((((....(((.(((....)))...)))))))))..)))))))))..))).)).))))..))..))))).......	..........................................((((((....(((.(((....)))...)))))))))..........................................	33	33	22	32
545	664	37	-27.4	-0.26	0.33	37.9	0.0194546	TTTTCCAACCACATTGGGGATGAATAAGTGTTATATACAGATCATGGATCTTGGACACATGTGTGATGCCACCATGAGCTATGAATGCCCTATGCTGGATGAGGGGGTGGAACCAGATGA	..(((((.((.((((.((.(((.....(((((.((((....((((((....(((.(((....)))...)))))))))..)))))))))..))).)).))))..))..)))))........	...((((....((((.((.((....................((((((....(((.(((....)))...)))))))))..............)).)).))))......)))).........	34	33	21	32
546	665	37	-27.4	-0.03	0.45	37.28	0.0205281	TTTCCAACCACATTGGGGATGAATAAGTGTTATATACAGATCATGGATCTTGGACACATGTGTGATGCCACCATGAGCTATGAATGCCCTATGCTGGATGAGGGGGTGGAACCAGATGAC	.(((((.((.((((.((.(((.....(((((.((((....((((((....(((.(((....)))...)))))))))..)))))))))..))).)).))))..))..))))).........	..((((....((((.((.((....................((((((....(((.(((....)))...)))))))))..............)).)).))))......))))..........	34	33	22	31
547	666	37	-27.2	0.527	0.66	37.58	0.018051	TTCCAACCACATTGGGGATGAATAAGTGTTATATACAGATCATGGATCTTGGACACATGTGTGATGCCACCATGAGCTATGAATGCCCTATGCTGGATGAGGGGGTGGAACCAGATGACG	(((((.((.((((.((.(((.....(((((.((((....((((((....(((.(((....)))...)))))))))..)))))))))..))).)).))))..))..)))))..........	.((((....((((.((.((....................((((((....(((.(((....)))...)))))))))..............)).)).))))......))))...........	34	34	22	30
548	667	37	-26.6	0.434	0.72	39.02	0.0149565	TCCAACCACATTGGGGATGAATAAGTGTTATATACAGATCATGGATCTTGGACACATGTGTGATGCCACCATGAGCTATGAATGCCCTATGCTGGATGAGGGGGTGGAACCAGATGACGT	((((.((.((((.((.(((.....(((((.((((....((((((....(((.(((....)))...)))))))))..)))))))))..))).)).))))..))..))))............	.....(((((..(((.((....................((((((....(((.(((....)))...))))))))).......)).)))..)).))).........................	34	34	22	30
549	668	37	-25.7	0.583	0.76	30.84	0.00725452	CCAACCACATTGGGGATGAATAAGTGTTATATACAGATCATGGATCTTGGACACATGTGTGATGCCACCATGAGCTATGAATGCCCTATGCTGGATGAGGGGGTGGAACCAGATGACGTC	.((.((((((.(((.((..(((.((............((((((....(((.(((....)))...))))))))))))))..)).))).))).))).))...((......))..........	.((.((((((.(((.((..((................((((((....(((.(((....)))...)))))))))...))..)).))).))).))).)).......................	34	34	23	29
550	669	37	-25.3	1.029	0.84	30.54	0.00430568	CAACCACATTGGGGATGAATAAGTGTTATATACAGATCATGGATCTTGGACACATGTGTGATGCCACCATGAGCTATGAATGCCCTATGCTGGATGAGGGGGTGGAACCAGATGACGTCG	((.((((((.(((.((..(((.((............((((((....(((.(((....)))...))))))))))))))..)).))).))).))).))...((......))...........	((.((((((.(((.((..((................((((((....(((.(((....)))...)))))))))...))..)).))).))).))).))........................	34	35	22	29
551	670	37	-25.2	0.662	0.7	31.49	0.00848203	AACCACATTGGGGATGAATAAGTGTTATATACAGATCATGGATCTTGGACACATGTGTGATGCCACCATGAGCTATGAATGCCCTATGCTGGATGAGGGGGTGGAACCAGATGACGTCGA	..((((((.(((.((..(((.((............((((((....(((.(((....)))...))))))))))))))..)).))).))).)))..((.(..((........))..).))..	..((((((.(((.((..((................((((((....(((.(((....)))...)))))))))...))..)).))).))).)))............................	35	35	21	29
552	671	37	-25.2	1.01	0.82	31.68	0.00848123	ACCACATTGGGGATGAATAAGTGTTATATACAGATCATGGATCTTGGACACATGTGTGATGCCACCATGAGCTATGAATGCCCTATGCTGGATGAGGGGGTGGAACCAGATGACGTCGAT	.((((((.(((.((..(((.((............((((((....(((.(((....)))...))))))))))))))..)).))).))).)))..((.(..((........))..).))...	.((((((.(((.((..((................((((((....(((.(((....)))...)))))))))...))..)).))).))).))).............................	34	35	21	30
553	672	37	-25.2	0.808	0.84	31.1	0.00850681	CCACATTGGGGATGAATAAGTGTTATATACAGATCATGGATCTTGGACACATGTGTGATGCCACCATGAGCTATGAATGCCCTATGCTGGATGAGGGGGTGGAACCAGATGACGTCGATT	((((((.(((.((..(((.((............((((((....(((.(((....)))...))))))))))))))..)).))).))).)))..((.(..((........))..).))....	((((((.(((.((..((................((((((....(((.(((....)))...)))))))))...))..)).))).))).)))..............................	33	35	21	31
554	673	37	-23.3	1.411	0.92	35.49	0.0044652	CACATTGGGGATGAATAAGTGTTATATACAGATCATGGATCTTGGACACATGTGTGATGCCACCATGAGCTATGAATGCCCTATGCTGGATGAGGGGGTGGAACCAGATGACGTCGATTG	(((((.(((.((..(((.((............((((((....(((.(((....)))...))))))))))))))..)).))).))).))((((...((......))......)))).....	..(((.(((.((..((................((((((....(((.(((....)))...)))))))))...))..)).))).)))...((((...................)))).....	33	36	20	31
555	674	37	-22.7	1.536	0.96	41.25	0.00298033	ACATTGGGGATGAATAAGTGTTATATACAGATCATGGATCTTGGACACATGTGTGATGCCACCATGAGCTATGAATGCCCTATGCTGGATGAGGGGGTGGAACCAGATGACGTCGATTGT	.(((.(((.((..(((.((............((((((....(((.(((....)))...))))))))))))))..)).))).))).(.((((...((......))......)))).)....	.((..(((.((....................((((((....(((.(((....)))...))))))))).......)).)))..))...((((...................))))......	33	36	19	32
556	675	37	-22.1	1.935	0.96	45.86	0.00191629	CATTGGGGATGAATAAGTGTTATATACAGATCATGGATCTTGGACACATGTGTGATGCCACCATGAGCTATGAATGCCCTATGCTGGATGAGGGGGTGGAACCAGATGACGTCGATTGTT	((((.((.........((((...))))...((((((.((.(((...(((.....)))...))).)).))))))((.((((((.....)).)))).))....)).))))............	...............................(((((....(((..............)))))))).......................................................	32	36	19	33
557	676	37	-20.8	1.872	0.98	47.02	0.000728521	ATTGGGGATGAATAAGTGTTATATACAGATCATGGATCTTGGACACATGTGTGATGCCACCATGAGCTATGAATGCCCTATGCTGGATGAGGGGGTGGAACCAGATGACGTCGATTGTTG	...(((.((..(((.((............((((((....(((.(((....)))...))))))))))))))..)).))).....(.((((...((......))......)))).)......	........................................................................................................................	32	37	18	33
558	677	37	-21.2	2.205	0.98	47.74	0.00122664	TTGGGGATGAATAAGTGTTATATACAGATCATGGATCTTGGACACATGTGTGATGCCACCATGAGCTATGAATGCCCTATGCTGGATGAGGGGGTGGAACCAGATGACGTCGATTGTTGG	((((..........((((...))))...((((((.((.(((...(((.....)))...))).)).))))))((.((((((.....)).)))).))....))))..((((.....))))..	........................................................................................................................	31	38	18	33
559	678	37	-21.1	1.983	0.96	50.71	0.000694211	TGGGGATGAATAAGTGTTATATACAGATCATGGATCTTGGACACATGTGTGATGCCACCATGAGCTATGAATGCCCTATGCTGGATGAGGGGGTGGAACCAGATGACGTCGATTGTTGGT	.....((.((((((((((((...((..((((((.((.(((...(((.....)))...))).)).)))))).))((((((.....)).))))(((...)))..)))))).)..))))).))	........................................................................................................................	31	38	18	33
560	679	37	-21.9	2.289	0.98	51.06	0.00144885	GGGGATGAATAAGTGTTATATACAGATCATGGATCTTGGACACATGTGTGATGCCACCATGAGCTATGAATGCCCTATGCTGGATGAGGGGGTGGAACCAGATGACGTCGATTGTTGGTG	....((.((((((((((((...((..((((((.((.(((...(((.....)))...))).)).)))))).))((((((.....)).))))(((...)))..)))))).)..))))).)).	........................................................................................................................	31	39	18	32
561	680	37	-22.6	1.958	0.96	47.37	0.00280643	GGGATGAATAAGTGTTATATACAGATCATGGATCTTGGACACATGTGTGATGCCACCATGAGCTATGAATGCCCTATGCTGGATGAGGGGGTGGAACCAGATGACGTCGATTGTTGGTGC	.(.((.((((((((((((...((..((((((.((.(((...(((.....)))...))).)).)))))).))((((((.....)).))))(((...)))..)))))).)..))))).)).)	...((.((((.............................................................(((............)))......................)))).))..	31	38	19	32
562	681	37	-24.3	1.247	0.86	37.14	0.00577359	GGATGAATAAGTGTTATATACAGATCATGGATCTTGGACACATGTGTGATGCCACCATGAGCTATGAATGCCCTATGCTGGATGAGGGGGTGGAACCAGATGACGTCGATTGTTGGTGCA	(.((.((((((((((((...((..((((((.((.(((...(((.....)))...))).)).)))))).))((((((.....)).))))(((...)))..)))))).)..))))).)).).	(.((.(((((.((((((.....................................................((((.(.....)..))))...........))))))....))))).)).).	32	37	19	32
563	682	37	-22.2	1.877	0.98	49.31	0.00149623	GATGAATAAGTGTTATATACAGATCATGGATCTTGGACACATGTGTGATGCCACCATGAGCTATGAATGCCCTATGCTGGATGAGGGGGTGGAACCAGATGACGTCGATTGTTGGTGCAA	.........((((...))))...((((((.((.(((...(((.....)))...))).)).)))))).(((((.(((.(.((((...((......))......)))).).))).)).))).	........................................................................................................................	33	36	19	32
564	683	37	-22.2	1.766	0.92	48.45	0.0020643	ATGAATAAGTGTTATATACAGATCATGGATCTTGGACACATGTGTGATGCCACCATGAGCTATGAATGCCCTATGCTGGATGAGGGGGTGGAACCAGATGACGTCGATTGTTGGTGCAAC	........((((...))))...((((((.((.(((...(((.....)))...))).)).)))))).(((((.(((.(.((((...((......))......)))).).))).)).)))..	........................................................................................................................	33	35	20	32
565	684	37	-22.2	1.567	0.96	50.92	0.00131056	TGAATAAGTGTTATATACAGATCATGGATCTTGGACACATGTGTGATGCCACCATGAGCTATGAATGCCCTATGCTGGATGAGGGGGTGGAACCAGATGACGTCGATTGTTGGTGCAACA	.......((((...))))...((((((.((.(((...(((.....)))...))).)).)))))).(((((.(((.(.((((...((......))......)))).).))).)).)))...	........................................................................................................................	33	35	20	32
566	685	37	-24.6	1.529	0.9	48.21	0.00777347	GAATAAGTGTTATATACAGATCATGGATCTTGGACACATGTGTGATGCCACCATGAGCTATGAATGCCCTATGCTGGATGAGGGGGTGGAACCAGATGACGTCGATTGTTGGTGCAACAC	......(((((.(((...(((((((.((((.((...(((.(.(....(((.((((.((.......))..)))).)))....).).)))...))))))..))).))))....))).)))))	......(((((........................................................................................................)))))	33	35	21	31
567	686	37	-25.8	0.634	0.7	48.61	0.00803094	AATAAGTGTTATATACAGATCATGGATCTTGGACACATGTGTGATGCCACCATGAGCTATGAATGCCCTATGCTGGATGAGGGGGTGGAACCAGATGACGTCGATTGTTGGTGCAACACG	.....(((((.(((...(((((((.((((.((...(((.(.(....(((.((((.((.......))..)))).)))....).).)))...))))))..))).))))....))).))))).	.....(((((........................................................................................................))))).	33	35	21	31
568	687	37	-25.8	0.631	0.72	48.93	0.00786203	ATAAGTGTTATATACAGATCATGGATCTTGGACACATGTGTGATGCCACCATGAGCTATGAATGCCCTATGCTGGATGAGGGGGTGGAACCAGATGACGTCGATTGTTGGTGCAACACGA	....(((((.(((...(((((((.((((.((...(((.(.(....(((.((((.((.......))..)))).)))....).).)))...))))))..))).))))....))).)))))..	....(((((........................................................................................................)))))..	33	35	21	31
569	688	37	-25.8	1.008	0.86	52.85	0.00522762	TAAGTGTTATATACAGATCATGGATCTTGGACACATGTGTGATGCCACCATGAGCTATGAATGCCCTATGCTGGATGAGGGGGTGGAACCAGATGACGTCGATTGTTGGTGCAACACGAC	...(((((.(((...(((((((.((((.((...(((.(.(....(((.((((.((.......))..)))).)))....).).)))...))))))..))).))))....))).)))))...	...((((........................................................(((............)))................................))))...	32	35	22	31
570	689	37	-27.1	0.844	0.76	44.39	0.00382542	AAGTGTTATATACAGATCATGGATCTTGGACACATGTGTGATGCCACCATGAGCTATGAATGCCCTATGCTGGATGAGGGGGTGGAACCAGATGACGTCGATTGTTGGTGCAACACGACG	..(((((......(((((...)))))..)))))..((.((...(((((..............((((((.....)).)))))))))...)).))..(((((..(((((...))))))))))	..............................................................(((............)))...............(((((..(((((...))))))))))	32	36	22	30
571	690	37	-28.7	0.596	0.72	41.73	0.00444839	AGTGTTATATACAGATCATGGATCTTGGACACATGTGTGATGCCACCATGAGCTATGAATGCCCTATGCTGGATGAGGGGGTGGAACCAGATGACGTCGATTGTTGGTGCAACACGACGT	.(((((......(((((...)))))..)))))..((.((...(((((..............((((((.....)).)))))))))...)).)).((((((..(((((...)))))))))))	.............................................................(((............)))..............((((((..(((((...)))))))))))	31	36	22	31
572	691	37	-31.4	-0.03	0.43	40.69	0.0065375	GTGTTATATACAGATCATGGATCTTGGACACATGTGTGATGCCACCATGAGCTATGAATGCCCTATGCTGGATGAGGGGGTGGAACCAGATGACGTCGATTGTTGGTGCAACACGACGTC	(((((......(((((...)))))..)))))..((.((...(((((..............((((((.....)).)))))))))...)).))(((((((..(((((...))))))))))))	............................................................(((............))).............(((((((..(((((...))))))))))))	30	36	23	31
573	692	37	-32.8	-0.85	0.15	34.87	0.0071771	TGTTATATACAGATCATGGATCTTGGACACATGTGTGATGCCACCATGAGCTATGAATGCCCTATGCTGGATGAGGGGGTGGAACCAGATGACGTCGATTGTTGGTGCAACACGACGTCA	.............((((((.((.(((...(((.....)))...))).)).))))))((.((((((.....)).)))).)).........((((((((..(((((...)))))))))))))	...........................................................(((............)))............((((((((..(((((...)))))))))))))	31	35	23	31
574	693	37	-33.3	-1.05	0.13	32.95	0.0118074	GTTATATACAGATCATGGATCTTGGACACATGTGTGATGCCACCATGAGCTATGAATGCCCTATGCTGGATGAGGGGGTGGAACCAGATGACGTCGATTGTTGGTGCAACACGACGTCAA	............((((((.((.(((...(((.....)))...))).)).))))))((.((((((.....)).)))).)).........((((((((..(((((...))))))))))))).	..........................................................(((............)))............((((((((..(((((...))))))))))))).	32	35	23	30
575	694	37	-33.3	-1.04	0.11	32.15	0.013207	TTATATACAGATCATGGATCTTGGACACATGTGTGATGCCACCATGAGCTATGAATGCCCTATGCTGGATGAGGGGGTGGAACCAGATGACGTCGATTGTTGGTGCAACACGACGTCAAC	...........((((((.((.(((...(((.....)))...))).)).))))))((.((((((.....)).)))).)).........((((((((..(((((...)))))))))))))..	............(((((.....((..............)).)))))...........(((............)))............((((((((..(((((...)))))))))))))..	32	34	24	30
576	695	37	-33.7	-0.81	0.15	31.18	0.0110967	TATATACAGATCATGGATCTTGGACACATGTGTGATGCCACCATGAGCTATGAATGCCCTATGCTGGATGAGGGGGTGGAACCAGATGACGTCGATTGTTGGTGCAACACGACGTCAACT	..........((((((.((.(((...(((.....)))...))).)).))))))((.((((((.....)).)))).))......((.((((((((..(((((...))))))))))))).))	........................................................(((............))).........((.((((((((..(((((...))))))))))))).))	32	34	24	30
577	696	37	-34	-0.95	0.15	30.66	0.0140004	ATATACAGATCATGGATCTTGGACACATGTGTGATGCCACCATGAGCTATGAATGCCCTATGCTGGATGAGGGGGTGGAACCAGATGACGTCGATTGTTGGTGCAACACGACGTCAACTT	.........((((((.((.(((...(((.....)))...))).)).))))))((.((((((.....)).)))).))......((.((((((((..(((((...))))))))))))).)).	.......................................................(((............))).........((.((((((((..(((((...))))))))))))).)).	32	34	24	30
578	697	37	-34	-0.53	0.27	30.95	0.0105667	TATACAGATCATGGATCTTGGACACATGTGTGATGCCACCATGAGCTATGAATGCCCTATGCTGGATGAGGGGGTGGAACCAGATGACGTCGATTGTTGGTGCAACACGACGTCAACTTG	........((((((.((.(((...(((.....)))...))).)).))))))((.((((((.....)).)))).))......((.((((((((..(((((...))))))))))))).))..	.........(((((.....((..............)).)))))...........(((............))).........((.((((((((..(((((...))))))))))))).))..	31	35	24	30
579	698	37	-36	-1.51	0.09	29.64	0.00958487	ATACAGATCATGGATCTTGGACACATGTGTGATGCCACCATGAGCTATGAATGCCCTATGCTGGATGAGGGGGTGGAACCAGATGACGTCGATTGTTGGTGCAACACGACGTCAACTTGG	.......((((((.((.(((...(((.....)))...))).)).))))))((.((((((.....)).)))).))....((((.((((((((..(((((...))))))))))))).).)))	........(((((.....((..............)).)))))........((.(((............))).))....((((.((((((((..(((((...))))))))))))).).)))	31	36	24	29
580	699	37	-37.1	-1.51	0.05	29.39	0.00990548	TACAGATCATGGATCTTGGACACATGTGTGATGCCACCATGAGCTATGAATGCCCTATGCTGGATGAGGGGGTGGAACCAGATGACGTCGATTGTTGGTGCAACACGACGTCAACTTGGG	......((((((.((.(((...(((.....)))...))).)).))))))((.((((((.....)).)))).))....((((.((((((((..(((((...))))))))))))).).))).	.......(((((....(((..............))))))))........((.(((............))).))....((((.((((((((..(((((...))))))))))))).).))).	30	37	24	29
581	700	37	-37.1	-1	0.11	30.07	0.00952481	ACAGATCATGGATCTTGGACACATGTGTGATGCCACCATGAGCTATGAATGCCCTATGCTGGATGAGGGGGTGGAACCAGATGACGTCGATTGTTGGTGCAACACGACGTCAACTTGGGT	.....((((((.((.(((...(((.....)))...))).)).))))))((.((((((.....)).)))).))....((((.((((((((..(((((...))))))))))))).).)))..	................................................((.(((............))).))....((((.((((((((..(((((...))))))))))))).).)))..	30	37	24	29
582	701	37	-37.1	-1.15	0.09	31.77	0.00648709	CAGATCATGGATCTTGGACACATGTGTGATGCCACCATGAGCTATGAATGCCCTATGCTGGATGAGGGGGTGGAACCAGATGACGTCGATTGTTGGTGCAACACGACGTCAACTTGGGTT	....((((((.((.(((...(((.....)))...))).)).))))))((.((((((.....)).)))).))....((((.((((((((..(((((...))))))))))))).).)))...	...............................................((.(((............))).))....((.(.((((((((..(((((...))))))))))))).)..))...	29	37	24	30
583	702	37	-37.7	-0.99	0.15	31.09	0.0121989	AGATCATGGATCTTGGACACATGTGTGATGCCACCATGAGCTATGAATGCCCTATGCTGGATGAGGGGGTGGAACCAGATGACGTCGATTGTTGGTGCAACACGACGTCAACTTGGGTTG	...((((((.((.(((...(((.....)))...))).)).))))))((.((((((.....)).)))).))..((((((.((((((((..(((((...))))))))))))).))..)))).	....(((((..(.(((.................))).)..))))).((.(((............))).))..((((.(.((((((((..(((((...))))))))))))).)...)))).	29	38	23	30
584	703	37	-37.7	-0.91	0.17	26.29	0.0133734	GATCATGGATCTTGGACACATGTGTGATGCCACCATGAGCTATGAATGCCCTATGCTGGATGAGGGGGTGGAACCAGATGACGTCGATTGTTGGTGCAACACGACGTCAACTTGGGTTGT	..((((((.((.(((...(((.....)))...))).)).))))))((.((((((.....)).)))).))..((((((.((((((((..(((((...))))))))))))).))..))))..	..((((((.((.(((...(((.....)))...))).)).))))))((.(((............))).))..((((((.((((((((..(((((...))))))))))))).))..))))..	28	38	23	31
585	704	37	-38	-1.44	0.05	23.51	0.0173558	ATCATGGATCTTGGACACATGTGTGATGCCACCATGAGCTATGAATGCCCTATGCTGGATGAGGGGGTGGAACCAGATGACGTCGATTGTTGGTGCAACACGACGTCAACTTGGGTTGTG	.((((((.((.(((...(((.....)))...))).)).))))))((.((((((.....)).)))).))(.((((((.((((((((..(((((...))))))))))))).))..)))).).	.((((((.((.(((...(((.....)))...))).)).))))))((.(((............))).))..((((((.((((((((..(((((...))))))))))))).))..))))...	28	38	23	31
586	705	37	-38	-1.61	0.05	23.58	0.0172357	TCATGGATCTTGGACACATGTGTGATGCCACCATGAGCTATGAATGCCCTATGCTGGATGAGGGGGTGGAACCAGATGACGTCGATTGTTGGTGCAACACGACGTCAACTTGGGTTGTGT	((((((.((.(((...(((.....)))...))).)).))))))((.((((((.....)).)))).))(.((((((.((((((((..(((((...))))))))))))).))..)))).)..	((((((.((.(((...(((.....)))...))).)).))))))((.(((............))).))..((((((.((((((((..(((((...))))))))))))).))..))))....	27	38	23	32
587	706	37	-36.4	-0.92	0.15	25.99	0.0176218	CATGGATCTTGGACACATGTGTGATGCCACCATGAGCTATGAATGCCCTATGCTGGATGAGGGGGTGGAACCAGATGACGTCGATTGTTGGTGCAACACGACGTCAACTTGGGTTGTGTA	(((((.((.(((...(((.....)))...))).)).))))).((.((((((.....)).)))).))(.((((((.((((((((..(((((...))))))))))))).))..)))).)...	(((((.((.(((...(((.....)))...))).)).))))).((.(((............))).))..((((((.((((((((..(((((...))))))))))))).))..)))).....	28	38	23	31
588	707	37	-34.9	-0.35	0.33	22.64	0.0173827	ATGGATCTTGGACACATGTGTGATGCCACCATGAGCTATGAATGCCCTATGCTGGATGAGGGGGTGGAACCAGATGACGTCGATTGTTGGTGCAACACGACGTCAACTTGGGTTGTGTAC	.....((.(((.(.((((.(((....))))))).)))).))((.((((((.....)).)))).))(.((((((.((((((((..(((((...))))))))))))).))..)))).)....	.....((.(((.(.((((.(((....))))))).)))).))((.(((............))).))..((((((.((((((((..(((((...))))))))))))).))..))))......	28	38	23	31
589	708	37	-34.9	-0.23	0.39	21.63	0.0159696	TGGATCTTGGACACATGTGTGATGCCACCATGAGCTATGAATGCCCTATGCTGGATGAGGGGGTGGAACCAGATGACGTCGATTGTTGGTGCAACACGACGTCAACTTGGGTTGTGTACG	....((.(((.(.((((.(((....))))))).)))).))((.((((((.....)).)))).))(.((((((.((((((((..(((((...))))))))))))).))..)))).).....	....((.(((.(.((((.(((....))))))).)))).))((.(((............))).))..((((((.((((((((..(((((...))))))))))))).))..)))).......	27	39	23	31
590	709	37	-34.9	-0.05	0.43	23.51	0.0147568	GGATCTTGGACACATGTGTGATGCCACCATGAGCTATGAATGCCCTATGCTGGATGAGGGGGTGGAACCAGATGACGTCGATTGTTGGTGCAACACGACGTCAACTTGGGTTGTGTACGG	...((.(((.(.((((.(((....))))))).)))).))((.((((((.....)).)))).))(.((((((.((((((((..(((((...))))))))))))).))..)))).)......	...((.(((.(.((((.(((....))))))).)))).)).(.(((............))).)...((((((.((((((((..(((((...))))))))))))).))..))))........	27	40	23	30
591	710	37	-34.9	-0.44	0.23	29	0.0111091	GATCTTGGACACATGTGTGATGCCACCATGAGCTATGAATGCCCTATGCTGGATGAGGGGGTGGAACCAGATGACGTCGATTGTTGGTGCAACACGACGTCAACTTGGGTTGTGTACGGA	..((.(((.(.((((.(((....))))))).)))).))((.((((((.....)).)))).))(.((((((.((((((((..(((((...))))))))))))).))..)))).).......	...(.(((.(.((((.(((....))))))).)))).)....(((............))).....((((.(.((((((((..(((((...))))))))))))).)...)))).........	28	39	23	30
592	711	37	-34.9	-0.46	0.27	31.23	0.00886022	ATCTTGGACACATGTGTGATGCCACCATGAGCTATGAATGCCCTATGCTGGATGAGGGGGTGGAACCAGATGACGTCGATTGTTGGTGCAACACGACGTCAACTTGGGTTGTGTACGGAA	.((.(((.(.((((.(((....))))))).)))).))((.((((((.....)).)))).))(.((((((.((((((((..(((((...))))))))))))).))..)))).)........	..........((((.(((....)))))))...........(((............)))......((..(.((((((((..(((((...))))))))))))).)....))...........	29	38	23	30
593	712	37	-34.9	-0.32	0.39	31.19	0.00852334	TCTTGGACACATGTGTGATGCCACCATGAGCTATGAATGCCCTATGCTGGATGAGGGGGTGGAACCAGATGACGTCGATTGTTGGTGCAACACGACGTCAACTTGGGTTGTGTACGGAAC	((.(((.(.((((.(((....))))))).)))).))((.((((((.....)).)))).))(.((((((.((((((((..(((((...))))))))))))).))..)))).).........	.........((((.(((....)))))))...........(((............)))......(((.(.((((((((..(((((...))))))))))))).)..).))............	28	38	24	30
594	713	37	-33.3	0.237	0.49	32.36	0.00182533	CTTGGACACATGTGTGATGCCACCATGAGCTATGAATGCCCTATGCTGGATGAGGGGGTGGAACCAGATGACGTCGATTGTTGGTGCAACACGACGTCAACTTGGGTTGTGTACGGAACC	..(((.(.((((.(((....))))))).))))...((.((((((.....)).)))).))(.((((((.((((((((..(((((...))))))))))))).))..)))).)..........	.....(((((((.(((....))))))............(((............))).......((.(.((((((((..(((((...))))))))))))).)..))...))))........	28	38	25	29
595	714	37	-33.5	-0.23	0.37	34.04	0.00254475	TTGGACACATGTGTGATGCCACCATGAGCTATGAATGCCCTATGCTGGATGAGGGGGTGGAACCAGATGACGTCGATTGTTGGTGCAACACGACGTCAACTTGGGTTGTGTACGGAACCT	.(((.(.((((.(((....))))))).))))...((.((((((.....)).)))).))......((.((((((((..(((((...))))))))))))).)).(((((........)))))	.....(..(((.(((....))))))............(((............)))..........(.((((((((..(((((...))))))))))))).).........)..........	28	38	24	30
596	715	37	-33.9	0.032	0.45	31.14	0.00598249	TGGACACATGTGTGATGCCACCATGAGCTATGAATGCCCTATGCTGGATGAGGGGGTGGAACCAGATGACGTCGATTGTTGGTGCAACACGACGTCAACTTGGGTTGTGTACGGAACCTG	(((.(.((((.(((....))))))).))))...((.((((((.....)).)))).))......((.((((((((..(((((...))))))))))))).)).(((((........))))).	......((((.(((....)))))))...........(((............)))..........(.((((((((..(((((...))))))))))))).)...((((........))))..	28	39	24	29
597	716	37	-33.1	0.312	0.58	31.89	0.00267962	GGACACATGTGTGATGCCACCATGAGCTATGAATGCCCTATGCTGGATGAGGGGGTGGAACCAGATGACGTCGATTGTTGGTGCAACACGACGTCAACTTGGGTTGTGTACGGAACCTGC	.....((((.(((....)))))))........((.((((((.....)).)))).))......((.((((((((..(((((...))))))))))))).)).(((((........)))))..	.....((((.(((....)))))))...........(((............))).........((.((((((((..(((((...))))))))))))).))..((((........))))...	28	39	25	28
598	717	37	-33.1	0.455	0.66	30.27	0.0036142	GACACATGTGTGATGCCACCATGAGCTATGAATGCCCTATGCTGGATGAGGGGGTGGAACCAGATGACGTCGATTGTTGGTGCAACACGACGTCAACTTGGGTTGTGTACGGAACCTGCC	....((((.(((....)))))))........((.((((((.....)).)))).))......((.((((((((..(((((...))))))))))))).)).(((((........)))))...	....((((.(((....)))))))...........(((............))).........((.((((((((..(((((...))))))))))))).))......................	28	38	26	28
599	718	37	-33.4	0.148	0.52	30.4	0.00376442	ACACATGTGTGATGCCACCATGAGCTATGAATGCCCTATGCTGGATGAGGGGGTGGAACCAGATGACGTCGATTGTTGGTGCAACACGACGTCAACTTGGGTTGTGTACGGAACCTGCCA	...((((.(((....)))))))...........((((((.....)).))))(((((..((((.((((((((..(((((...))))))))))))).).)))(((........)))))))).	...((((.(((....)))))))...........(((............))).........((.((((((((..(((((...))))))))))))).)).......................	29	37	26	28
600	719	37	-33.5	0.333	0.52	30.61	0.00436783	CACATGTGTGATGCCACCATGAGCTATGAATGCCCTATGCTGGATGAGGGGGTGGAACCAGATGACGTCGATTGTTGGTGCAACACGACGTCAACTTGGGTTGTGTACGGAACCTGCCAT	..((((.(((....))))))).((.......))((......))(((.(.(((((.((((((.((((((((..(((((...))))))))))))).))..)))).).......)))).))))	..((((.(((....)))))))......................................((.((((((((..(((((...))))))))))))).))........................	28	37	26	29
601	720	37	-35.5	-0.22	0.41	21.01	0.0247275	ACATGTGTGATGCCACCATGAGCTATGAATGCCCTATGCTGGATGAGGGGGTGGAACCAGATGACGTCGATTGTTGGTGCAACACGACGTCAACTTGGGTTGTGTACGGAACCTGCCATC	.((((.(((....)))))))(((...(......)...))).((((.(.(((((.((((((.((((((((..(((((...))))))))))))).))..)))).).......)))).)))))	.((((.(((....)))))))(((..............))).((((.(.((((..((((((.((((((((..(((((...))))))))))))).))..)))).........)))).)))))	28	37	26	29
602	721	37	-36.9	-0.71	0.21	16.88	0.0309137	CATGTGTGATGCCACCATGAGCTATGAATGCCCTATGCTGGATGAGGGGGTGGAACCAGATGACGTCGATTGTTGGTGCAACACGACGTCAACTTGGGTTGTGTACGGAACCTGCCATCA	((((.(((....)))))))(((...(......)...))).((((.(.(((((.((((((.((((((((..(((((...))))))))))))).))..)))).).......)))).))))).	((((.(((....)))))))(((..............))).((((.(.((((..((((((.((((((((..(((((...))))))))))))).))..)))).........)))).))))).	28	37	26	29
603	722	37	-35.4	-0.42	0.29	26.12	0.0116635	ATGTGTGATGCCACCATGAGCTATGAATGCCCTATGCTGGATGAGGGGGTGGAACCAGATGACGTCGATTGTTGGTGCAACACGACGTCAACTTGGGTTGTGTACGGAACCTGCCATCAC	....(((((((((((..............((((((.....)).)))))))))....((.((((((((..(((((...))))))))))))).)).(((((........)))))..))))))	....(((((((((((...............((............)).)))))....((.((((((((..(((((...))))))))))))).)).(((((........)))))..))))))	28	37	26	29
604	723	37	-37.2	-1.07	0.07	24.06	0.0082248	TGTGTGATGCCACCATGAGCTATGAATGCCCTATGCTGGATGAGGGGGTGGAACCAGATGACGTCGATTGTTGGTGCAACACGACGTCAACTTGGGTTGTGTACGGAACCTGCCATCACA	..((((((((((((..............((((((.....)).)))))))))....((.((((((((..(((((...))))))))))))).)).(((((........)))))..)))))))	..((((((((((((...............((............)).)))))....((.((((((((..(((((...))))))))))))).)).(((((........)))))..)))))))	28	37	26	29
605	724	37	-37.8	-0.76	0.19	23.85	0.0107969	GTGTGATGCCACCATGAGCTATGAATGCCCTATGCTGGATGAGGGGGTGGAACCAGATGACGTCGATTGTTGGTGCAACACGACGTCAACTTGGGTTGTGTACGGAACCTGCCATCACAA	.((((((((((((..............((((((.....)).)))))))))....((.((((((((..(((((...))))))))))))).)).(((((........)))))..))))))).	.((((((((((((...............((............)).)))))....((.((((((((..(((((...))))))))))))).)).(((((........)))))..))))))).	29	37	26	28
606	725	37	-37.8	-1.12	0.09	23.84	0.0107903	TGTGATGCCACCATGAGCTATGAATGCCCTATGCTGGATGAGGGGGTGGAACCAGATGACGTCGATTGTTGGTGCAACACGACGTCAACTTGGGTTGTGTACGGAACCTGCCATCACAAA	((((((((((((..............((((((.....)).)))))))))....((.((((((((..(((((...))))))))))))).)).(((((........)))))..)))))))..	((((((((((((...............((............)).)))))....((.((((((((..(((((...))))))))))))).)).(((((........)))))..)))))))..	30	36	26	28
607	726	37	-37.1	-1.24	0.09	23.67	0.0132391	GTGATGCCACCATGAGCTATGAATGCCCTATGCTGGATGAGGGGGTGGAACCAGATGACGTCGATTGTTGGTGCAACACGACGTCAACTTGGGTTGTGTACGGAACCTGCCATCACAAAA	(((((((((((..............((((((.....)).)))))))))....((.((((((((..(((((...))))))))))))).)).(((((........)))))..))))))....	(((((((((((...............((............)).)))))....((.((((((((..(((((...))))))))))))).)).(((((........)))))..))))))....	31	36	26	27
608	727	37	-33.3	-0.32	0.29	32.27	0.00376836	TGATGCCACCATGAGCTATGAATGCCCTATGCTGGATGAGGGGGTGGAACCAGATGACGTCGATTGTTGGTGCAACACGACGTCAACTTGGGTTGTGTACGGAACCTGCCATCACAAAAA	.....(((((..............((((((.....)).)))))))))..((((.((((((((..(((((...))))))))))))).).))).(((((...((......))..)))))...	.....((((..................................))))..((.(.((((((((..(((((...))))))))))))).)..))..((((...((......))..))))....	32	35	26	27
609	728	37	-33.3	-0.6	0.29	30.14	0.00593961	GATGCCACCATGAGCTATGAATGCCCTATGCTGGATGAGGGGGTGGAACCAGATGACGTCGATTGTTGGTGCAACACGACGTCAACTTGGGTTGTGTACGGAACCTGCCATCACAAAAAA	....(((((..............((((((.....)).)))))))))..((((.((((((((..(((((...))))))))))))).).))).(((((...((......))..)))))....	....(((((................................)))))..((.(.((((((((..(((((...))))))))))))).)..))..((((...((......))..)))).....	33	35	26	26
610	729	37	-33.3	-0.66	0.35	26.46	0.00830253	ATGCCACCATGAGCTATGAATGCCCTATGCTGGATGAGGGGGTGGAACCAGATGACGTCGATTGTTGGTGCAACACGACGTCAACTTGGGTTGTGTACGGAACCTGCCATCACAAAAAAG	...(((((..............((((((.....)).)))))))))..((((.((((((((..(((((...))))))))))))).).))).(((((...((......))..))))).....	...(((((...............((............)).)))))..((((.((((((((..(((((...))))))))))))).).))).(((((...((......))..))))).....	33	35	26	26
611	730	37	-33.3	-0.51	0.27	29.24	0.00786035	TGCCACCATGAGCTATGAATGCCCTATGCTGGATGAGGGGGTGGAACCAGATGACGTCGATTGTTGGTGCAACACGACGTCAACTTGGGTTGTGTACGGAACCTGCCATCACAAAAAAGG	..(((((..............((((((.....)).)))))))))..((((.((((((((..(((((...))))))))))))).).))).(((((...((......))..)))))......	..(((((...............((............)).)))))..((.(.((((((((..(((((...))))))))))))).)..))..((((...((......))..)))).......	32	36	26	26
612	731	37	-33.3	-0.59	0.23	33.05	0.00525914	GCCACCATGAGCTATGAATGCCCTATGCTGGATGAGGGGGTGGAACCAGATGACGTCGATTGTTGGTGCAACACGACGTCAACTTGGGTTGTGTACGGAACCTGCCATCACAAAAAAGGT	.(((((..............((((((.....)).)))))))))..((((.((((((((..(((((...))))))))))))).).))).(((((...((......))..))))).......	.............................................((.(.((((((((..(((((...))))))))))))).)..))...(((...............))).........	32	36	26	26
613	732	37	-33.6	-0.18	0.39	32.31	0.00400372	CCACCATGAGCTATGAATGCCCTATGCTGGATGAGGGGGTGGAACCAGATGACGTCGATTGTTGGTGCAACACGACGTCAACTTGGGTTGTGTACGGAACCTGCCATCACAAAAAAGGTG	.((((...(((...(......)...))).((((.(.(((((.((((((.((((((((..(((((...))))))))))))).))..)))).).......)))).)))))........))))	.((((.......................................((.(.((((((((..(((((...))))))))))))).)..))...(((...............)))......))))	32	36	26	26
614	733	37	-34.4	-0.65	0.25	28.43	0.0059639	CACCATGAGCTATGAATGCCCTATGCTGGATGAGGGGGTGGAACCAGATGACGTCGATTGTTGGTGCAACACGACGTCAACTTGGGTTGTGTACGGAACCTGCCATCACAAAAAAGGTGA	((((...(((...(......)...))).((((.(.(((((.((((((.((((((((..(((((...))))))))))))).))..)))).).......)))).)))))........)))).	((((.......................................((.(.((((((((..(((((...))))))))))))).)..))..............................)))).	33	36	25	26
615	734	37	-32.9	-0.7	0.27	25.11	0.0108114	ACCATGAGCTATGAATGCCCTATGCTGGATGAGGGGGTGGAACCAGATGACGTCGATTGTTGGTGCAACACGACGTCAACTTGGGTTGTGTACGGAACCTGCCATCACAAAAAAGGTGAA	.......((.......))(((.(..((((((.(.(((((.((((((.((((((((..(((((...))))))))))))).))..)))).).......)))).))))).))..).)))....	..................(((....((((((.(.((((..((((((.((((((((..(((((...))))))))))))).))..)))).........)))).))))).))....)))....	34	36	24	26
616	735	37	-32.9	-0.34	0.33	21.63	0.0127771	CCATGAGCTATGAATGCCCTATGCTGGATGAGGGGGTGGAACCAGATGACGTCGATTGTTGGTGCAACACGACGTCAACTTGGGTTGTGTACGGAACCTGCCATCACAAAAAAGGTGAAG	......((.......))(((.(..((((((.(.(((((.((((((.((((((((..(((((...))))))))))))).))..)))).).......)))).))))).))..).))).....	.................(((....((((((.(.((((..((((((.((((((((..(((((...))))))))))))).))..)))).........)))).))))).))....))).....	33	37	24	26
617	736	37	-32.9	-0.55	0.27	25.25	0.0117545	CATGAGCTATGAATGCCCTATGCTGGATGAGGGGGTGGAACCAGATGACGTCGATTGTTGGTGCAACACGACGTCAACTTGGGTTGTGTACGGAACCTGCCATCACAAAAAAGGTGAAGC	.....((.......))(((.(..((((((.(.(((((.((((((.((((((((..(((((...))))))))))))).))..)))).).......)))).))))).))..).)))......	................(((....((((((.(.((((..((((((.((((((((..(((((...))))))))))))).))..)))).........)))).))))).))....)))......	33	37	24	26
618	737	37	-33.1	-1.49	0.07	29.17	0.00513617	ATGAGCTATGAATGCCCTATGCTGGATGAGGGGGTGGAACCAGATGACGTCGATTGTTGGTGCAACACGACGTCAACTTGGGTTGTGTACGGAACCTGCCATCACAAAAAAGGTGAAGCA	....(((.....(..(((.(..((((((.(.(((((.((((((.((((((((..(((((...))))))))))))).))..)))).).......)))).))))).))..).)))..)))).	....(((...............((((((.(.((((..((((((.((((((((..(((((...))))))))))))).))..)))).........)))).))))).))..........))).	34	37	23	26
619	738	37	-33.4	-0.46	0.25	29.1	0.00745746	TGAGCTATGAATGCCCTATGCTGGATGAGGGGGTGGAACCAGATGACGTCGATTGTTGGTGCAACACGACGTCAACTTGGGTTGTGTACGGAACCTGCCATCACAAAAAAGGTGAAGCAC	...........((((((.(..((((((.(.(((((.((((((.((((((((..(((((...))))))))))))).))..)))).).......)))).))))).))..).)))....))).	...(((........(((....((((((.(.((((..((((((.((((((((..(((((...))))))))))))).))..)))).........)))).))))).))....)))...)))..	33	37	24	26
620	739	37	-33.4	-0.71	0.23	31.06	0.00575914	GAGCTATGAATGCCCTATGCTGGATGAGGGGGTGGAACCAGATGACGTCGATTGTTGGTGCAACACGACGTCAACTTGGGTTGTGTACGGAACCTGCCATCACAAAAAAGGTGAAGCACG	..........((((((.(..((((((.(.(((((.((((((.((((((((..(((((...))))))))))))).))..)))).).......)))).))))).))..).)))....)))..	..(((.................((((.(.((((..((((((.((((((((..(((((...))))))))))))).))..)))).........)))).))))).............)))...	33	38	24	25
621	740	37	-33.4	-0.43	0.25	32.6	0.00494074	AGCTATGAATGCCCTATGCTGGATGAGGGGGTGGAACCAGATGACGTCGATTGTTGGTGCAACACGACGTCAACTTGGGTTGTGTACGGAACCTGCCATCACAAAAAAGGTGAAGCACGG	.........((((((.(..((((((.(.(((((.((((((.((((((((..(((((...))))))))))))).))..)))).).......)))).))))).))..).)))....)))...	.....................((((.(.(((...((((((.((((((((..(((((...))))))))))))).))..))))..........))).)))))....................	33	38	24	25
622	741	37	-34	-0.65	0.27	32.44	0.00739597	GCTATGAATGCCCTATGCTGGATGAGGGGGTGGAACCAGATGACGTCGATTGTTGGTGCAACACGACGTCAACTTGGGTTGTGTACGGAACCTGCCATCACAAAAAAGGTGAAGCACGGA	.((.((..(..(((.(..((((((.(.(((((.((((((.((((((((..(((((...))))))))))))).))..)))).).......)))).))))).))..).)))..)..)).)).	....................((((.(.((((..((((((.((((((((..(((((...))))))))))))).))..)))).........)))).))))).....................	33	38	24	25
623	742	37	-33.8	-1.02	0.11	31.33	0.00869504	CTATGAATGCCCTATGCTGGATGAGGGGGTGGAACCAGATGACGTCGATTGTTGGTGCAACACGACGTCAACTTGGGTTGTGTACGGAACCTGCCATCACAAAAAAGGTGAAGCACGGAG	((.((..(..(((.(..((((((.(.(((((.((((((.((((((((..(((((...))))))))))))).))..)))).).......)))).))))).))..).)))..)..)).))..	...................((((.(.((((..((((((.((((((((..(((((...))))))))))))).))..)))).........)))).)))))......................	33	38	24	25
624	743	37	-33.5	-0.84	0.13	32.09	0.00817914	TATGAATGCCCTATGCTGGATGAGGGGGTGGAACCAGATGACGTCGATTGTTGGTGCAACACGACGTCAACTTGGGTTGTGTACGGAACCTGCCATCACAAAAAAGGTGAAGCACGGAGA	.....((.((((((.....)).)))).))(.((((((.((((((((..(((((...))))))))))))).))..)))).)........(((((..((((.......)))).))).))...	...............................((((((.((((((((..(((((...))))))))))))).))..))))..........................................	34	38	23	25
625	744	37	-33.5	-1.05	0.09	32.1	0.00819447	ATGAATGCCCTATGCTGGATGAGGGGGTGGAACCAGATGACGTCGATTGTTGGTGCAACACGACGTCAACTTGGGTTGTGTACGGAACCTGCCATCACAAAAAAGGTGAAGCACGGAGAT	....((.((((((.....)).)))).))(.((((((.((((((((..(((((...))))))))))))).))..)))).)........(((((..((((.......)))).))).))....	..............................((((((.((((((((..(((((...))))))))))))).))..))))...........................................	34	38	23	25
626	745	37	-33.5	-0.6	0.25	32.24	0.00780444	TGAATGCCCTATGCTGGATGAGGGGGTGGAACCAGATGACGTCGATTGTTGGTGCAACACGACGTCAACTTGGGTTGTGTACGGAACCTGCCATCACAAAAAAGGTGAAGCACGGAGATC	...((.((((((.....)).)))).))(.((((((.((((((((..(((((...))))))))))))).))..)))).)........(((((..((((.......)))).))).)).....	.............................((((((.((((((((..(((((...))))))))))))).))..))))............................................	33	38	24	25
627	746	37	-33.7	-0.43	0.29	30.92	0.00655504	GAATGCCCTATGCTGGATGAGGGGGTGGAACCAGATGACGTCGATTGTTGGTGCAACACGACGTCAACTTGGGTTGTGTACGGAACCTGCCATCACAAAAAAGGTGAAGCACGGAGATCT	..((.((((((.....)).)))).))(.((((((.((((((((..(((((...))))))))))))).))..)))).)....(((.(((((..((((.......)))).))).))...)))	.....(((............))).....((((((.((((((((..(((((...))))))))))))).))..))))..........(((((..((((.......)))).))).))......	33	38	24	25
628	747	37	-34.2	-1.03	0.09	28.47	0.011073	AATGCCCTATGCTGGATGAGGGGGTGGAACCAGATGACGTCGATTGTTGGTGCAACACGACGTCAACTTGGGTTGTGTACGGAACCTGCCATCACAAAAAAGGTGAAGCACGGAGATCTA	.((.((((((.....)).)))).))(.((((((.((((((((..(((((...))))))))))))).))..)))).)....(((.(((((..((((.......)))).))).))...))).	..(.(((............))).)...((((((.((((((((..(((((...))))))))))))).))..)))).......((.(((((..((((.......)))).))).))...))..	34	37	24	25
629	748	37	-33.8	-0.54	0.25	30.15	0.00723982	ATGCCCTATGCTGGATGAGGGGGTGGAACCAGATGACGTCGATTGTTGGTGCAACACGACGTCAACTTGGGTTGTGTACGGAACCTGCCATCACAAAAAAGGTGAAGCACGGAGATCTAG	((.((((((.....)).)))).))(.((((((.((((((((..(((((...))))))))))))).))..)))).)....(((.(((((..((((.......)))).))).))...)))..	..........................((((((.((((((((..(((((...))))))))))))).))..)))).......((.(((((..((((.......)))).))).))...))...	33	38	24	25
630	749	37	-33.4	-0.3	0.31	31.13	0.00504842	TGCCCTATGCTGGATGAGGGGGTGGAACCAGATGACGTCGATTGTTGGTGCAACACGACGTCAACTTGGGTTGTGTACGGAACCTGCCATCACAAAAAAGGTGAAGCACGGAGATCTAGA	.(((((...((.....)))))))(.((((((.((((((((..(((((...))))))))))))).))..)))).)....(((.(((((..((((.......)))).))).))...)))...	..(((..............)))...((((((.((((((((..(((((...))))))))))))).))..))))..........(((((..((((.......)))).))).)).........	33	38	24	25
631	750	37	-33.3	-1.21	0.09	30.56	0.0062006	GCCCTATGCTGGATGAGGGGGTGGAACCAGATGACGTCGATTGTTGGTGCAACACGACGTCAACTTGGGTTGTGTACGGAACCTGCCATCACAAAAAAGGTGAAGCACGGAGATCTAGAA	(((((...((.....)))))))(.((((((.((((((((..(((((...))))))))))))).))..)))).)....(((.(((((..((((.......)))).))).))...)))....	........................((((((.((((((((..(((((...))))))))))))).))..))))..........(((((..((((.......)))).))).))..........	34	38	24	24
632	751	37	-32.4	-0.48	0.29	32.69	0.00347399	CCCTATGCTGGATGAGGGGGTGGAACCAGATGACGTCGATTGTTGGTGCAACACGACGTCAACTTGGGTTGTGTACGGAACCTGCCATCACAAAAAAGGTGAAGCACGGAGATCTAGAAG	.(((.(..((((((.(.(((((.((((((.((((((((..(((((...))))))))))))).))..)))).).......)))).))))).))..).))).....................	.......................((((((.((((((((..(((((...))))))))))))).))..))))..........(((((..((((.......)))).))).))...........	34	38	24	24
633	752	37	-32.2	-0.59	0.27	31.28	0.00611236	CCTATGCTGGATGAGGGGGTGGAACCAGATGACGTCGATTGTTGGTGCAACACGACGTCAACTTGGGTTGTGTACGGAACCTGCCATCACAAAAAAGGTGAAGCACGGAGATCTAGAAGA	......((((((....((......))((.((((((((..(((((...))))))))))))).)).(((((........)))))((..((((.......)))).))......))))))....	......((((((..............((.((((((((..(((((...))))))))))))).))...................((..((((.......)))).))......))))))....	35	38	23	24
634	753	37	-32.2	-0.77	0.23	26.27	0.0063163	CTATGCTGGATGAGGGGGTGGAACCAGATGACGTCGATTGTTGGTGCAACACGACGTCAACTTGGGTTGTGTACGGAACCTGCCATCACAAAAAAGGTGAAGCACGGAGATCTAGAAGAG	.....((((((....((......))((.((((((((..(((((...))))))))))))).)).(((((........)))))((..((((.......)))).))......)))))).....	.....((((((..............((.((((((((..(((((...))))))))))))).))..((((........)))).((..((((.......)))).))......)))))).....	35	39	22	24
635	754	37	-32.2	-0.68	0.19	23.41	0.0121148	TATGCTGGATGAGGGGGTGGAACCAGATGACGTCGATTGTTGGTGCAACACGACGTCAACTTGGGTTGTGTACGGAACCTGCCATCACAAAAAAGGTGAAGCACGGAGATCTAGAAGAGC	....((((((....((......))((.((((((((..(((((...))))))))))))).)).(((((........)))))((..((((.......)))).))......))))))......	....((((((..............((.((((((((..(((((...))))))))))))).))..((((........)))).((..((((.......)))).))......))))))......	35	39	22	24
636	755	37	-32.2	-0.85	0.19	25.93	0.0112973	ATGCTGGATGAGGGGGTGGAACCAGATGACGTCGATTGTTGGTGCAACACGACGTCAACTTGGGTTGTGTACGGAACCTGCCATCACAAAAAAGGTGAAGCACGGAGATCTAGAAGAGCT	...((((((....((......))((.((((((((..(((((...))))))))))))).)).(((((........)))))((..((((.......)))).))......)))))).......	...((((((..............((.((((((((..(((((...))))))))))))).))..((((........)))).((..((((.......)))).))......)))))).......	35	39	22	24
637	756	37	-32.2	-0.66	0.25	27.73	0.0104397	TGCTGGATGAGGGGGTGGAACCAGATGACGTCGATTGTTGGTGCAACACGACGTCAACTTGGGTTGTGTACGGAACCTGCCATCACAAAAAAGGTGAAGCACGGAGATCTAGAAGAGCTG	..((((((....((......))((.((((((((..(((((...))))))))))))).)).(((((........)))))((..((((.......)))).))......))))))........	..((((((..............((.((((((((..(((((...))))))))))))).))...................((..((((.......)))).))......))))))........	34	40	22	24
638	757	37	-32.2	-0.65	0.25	29.44	0.0101098	GCTGGATGAGGGGGTGGAACCAGATGACGTCGATTGTTGGTGCAACACGACGTCAACTTGGGTTGTGTACGGAACCTGCCATCACAAAAAAGGTGAAGCACGGAGATCTAGAAGAGCTGT	.((((((....((......))((.((((((((..(((((...))))))))))))).)).(((((........)))))((..((((.......)))).))......)))))).........	.((((((..............((.((((((((..(((((...))))))))))))).))...................((..((((.......)))).))......)))))).........	34	40	22	24
639	758	37	-33.6	-1.26	0.09	23.86	0.0340661	CTGGATGAGGGGGTGGAACCAGATGACGTCGATTGTTGGTGCAACACGACGTCAACTTGGGTTGTGTACGGAACCTGCCATCACAAAAAAGGTGAAGCACGGAGATCTAGAAGAGCTGTG	.((((((.(.(((((.((((((.((((((((..(((((...))))))))))))).))..)))).).......)))).))))).))............(((((...(((...))).)))))	.((((((.(.((((..((((((.((((((((..(((((...))))))))))))).))..)))).........)))).))))).))............(((((...(((...))).)))))	34	40	22	24
640	759	37	-34.5	-1.64	0.07	13.77	0.0423497	TGGATGAGGGGGTGGAACCAGATGACGTCGATTGTTGGTGCAACACGACGTCAACTTGGGTTGTGTACGGAACCTGCCATCACAAAAAAGGTGAAGCACGGAGATCTAGAAGAGCTGTGA	((((((.(.(((((.((((((.((((((((..(((((...))))))))))))).))..)))).).......)))).))))).))............(((((...(((...))).))))).	((((((.(.((((..((((((.((((((((..(((((...))))))))))))).))..)))).........)))).))))).))............(((((...(((...))).))))).	35	40	21	24
641	760	37	-34	-1.61	0.03	13.64	0.0361768	GGATGAGGGGGTGGAACCAGATGACGTCGATTGTTGGTGCAACACGACGTCAACTTGGGTTGTGTACGGAACCTGCCATCACAAAAAAGGTGAAGCACGGAGATCTAGAAGAGCTGTGAC	.((((.(.(((((.((((((.((((((((..(((((...))))))))))))).))..)))).).......)))).)))))...............(((((...(((...))).)))))..	.((((.(.((((..((((((.((((((((..(((((...))))))))))))).))..)))).........)))).)))))...............(((((...(((...))).)))))..	35	40	22	23
642	761	37	-34.3	-1.66	0.01	12.86	0.0395119	GATGAGGGGGTGGAACCAGATGACGTCGATTGTTGGTGCAACACGACGTCAACTTGGGTTGTGTACGGAACCTGCCATCACAAAAAAGGTGAAGCACGGAGATCTAGAAGAGCTGTGACG	((((.(.(((((.((((((.((((((((..(((((...))))))))))))).))..)))).).......)))).)))))...............(((((...(((...))).)))))...	((((.(.((((..((((((.((((((((..(((((...))))))))))))).))..)))).........)))).)))))...............(((((...(((...))).)))))...	35	40	22	23
643	762	37	-31.6	-0.6	0.25	24.76	0.00818525	ATGAGGGGGTGGAACCAGATGACGTCGATTGTTGGTGCAACACGACGTCAACTTGGGTTGTGTACGGAACCTGCCATCACAAAAAAGGTGAAGCACGGAGATCTAGAAGAGCTGTGACGC	.((.(.(((((.((((((.((((((((..(((((...))))))))))))).))..)))).).......)))).)))((((.......))))..(((((...(((...))).)))))....	......((((..((((((.((((((((..(((((...))))))))))))).))..)))).........))))....((((.......))))..(((((...(((...))).)))))....	35	39	23	23
644	763	37	-32.1	-0.43	0.35	31.28	0.00530687	TGAGGGGGTGGAACCAGATGACGTCGATTGTTGGTGCAACACGACGTCAACTTGGGTTGTGTACGGAACCTGCCATCACAAAAAAGGTGAAGCACGGAGATCTAGAAGAGCTGTGACGCT	((((((((((.((((((.((((((((..(((((...))))))))))))).))..)))).).......)))).)).))).......((((...(((((...(((...))).))))).))))	............(..((.((((((((..(((((...))))))))))))).))....)...................................(((((...(((...))).))))).....	34	39	23	24
645	764	37	-33.1	-0.77	0.19	33.68	0.00625569	GAGGGGGTGGAACCAGATGACGTCGATTGTTGGTGCAACACGACGTCAACTTGGGTTGTGTACGGAACCTGCCATCACAAAAAAGGTGAAGCACGGAGATCTAGAAGAGCTGTGACGCTC	(((.((((...)))((.((((((((..(((((...))))))))))))).)).(((((........)))))..((((........))))...(((((...(((...))).))))).).)))	..............((.((((((((..(((((...))))))))))))).))...(((........)))......((((.......))))..(((((...(((...))).)))))......	34	39	24	23
646	765	37	-35.3	-1.09	0.09	27.88	0.00815811	AGGGGGTGGAACCAGATGACGTCGATTGTTGGTGCAACACGACGTCAACTTGGGTTGTGTACGGAACCTGCCATCACAAAAAAGGTGAAGCACGGAGATCTAGAAGAGCTGTGACGCTCC	..((((((.....((.((((((((..(((((...))))))))))))).)).(((((........)))))..((((........))))...(((((...(((...))).))))).))))))	..((((((......(.((((((((..(((((...))))))))))))).)....(((........)))......((((.......))))..(((((...(((...))).))))).))))))	34	38	25	23
647	766	37	-38.6	-2.05	0.01	26.63	0.00891666	GGGGGTGGAACCAGATGACGTCGATTGTTGGTGCAACACGACGTCAACTTGGGTTGTGTACGGAACCTGCCATCACAAAAAAGGTGAAGCACGGAGATCTAGAAGAGCTGTGACGCTCCC	(((((((.....((.((((((((..(((((...))))))))))))).)).(((((........)))))..((((........))))...(((((...(((...))).))))).)))))))	(((((((......(.((((((((..(((((...))))))))))))).)....(((........)))......((((.......))))..(((((...(((...))).))))).)))))))	33	38	26	23
648	767	37	-36.1	-1.07	0.07	34.36	0.00498942	GGGGTGGAACCAGATGACGTCGATTGTTGGTGCAACACGACGTCAACTTGGGTTGTGTACGGAACCTGCCATCACAAAAAAGGTGAAGCACGGAGATCTAGAAGAGCTGTGACGCTCCCC	((((((.....((.((((((((..(((((...))))))))))))).)).(((((........)))))..((((........))))...(((((...(((...))).))))).))))))..	((((((......(.((((((((..(((((...))))))))))))).)........................((((.......))))..........(((...))).......))))))..	33	37	27	23
649	768	37	-35.7	-0.9	0.11	34.93	0.0106968	GGGTGGAACCAGATGACGTCGATTGTTGGTGCAACACGACGTCAACTTGGGTTGTGTACGGAACCTGCCATCACAAAAAAGGTGAAGCACGGAGATCTAGAAGAGCTGTGACGCTCCCCT	((......))((.((((((((..(((((...))))))))))))).)).(((..((((((((..(((((..((((.......)))).))).)).............)))).))))..))).	..........((.((((((((..(((((...))))))))))))).))................(((((..((((.......)))).))).))............................	33	36	27	24
650	769	37	-34.9	-1.04	0.13	35.86	0.0121874	GGTGGAACCAGATGACGTCGATTGTTGGTGCAACACGACGTCAACTTGGGTTGTGTACGGAACCTGCCATCACAAAAAAGGTGAAGCACGGAGATCTAGAAGAGCTGTGACGCTCCCCTC	(((...)))((.((((((((..(((((...))))))))))))).)).(((..((((((((..(((((..((((.......)))).))).)).............)))).))))..)))..	.........((.((((((((..(((((...))))))))))))).))................(((((..((((.......)))).))).))...((.....)).................	33	35	28	24
651	770	37	-33.6	-0.57	0.25	33.92	0.00802976	GTGGAACCAGATGACGTCGATTGTTGGTGCAACACGACGTCAACTTGGGTTGTGTACGGAACCTGCCATCACAAAAAAGGTGAAGCACGGAGATCTAGAAGAGCTGTGACGCTCCCCTCC	........((.((((((((..(((((...))))))))))))).)).(((..((((((((..(((((..((((.......)))).))).)).............)))).))))..)))...	........((.((((((((..(((((...))))))))))))).))................(((((..((((.......)))).))).))..............................	33	34	29	24
652	771	37	-34	-0.62	0.27	34.34	0.0108592	TGGAACCAGATGACGTCGATTGTTGGTGCAACACGACGTCAACTTGGGTTGTGTACGGAACCTGCCATCACAAAAAAGGTGAAGCACGGAGATCTAGAAGAGCTGTGACGCTCCCCTCCC	.(((...((.((((((((..(((((...))))))))))))).)).(((..((((((((..(((((..((((.......)))).))).)).............)))).))))..)))))).	.((....((.((((((((..(((((...))))))))))))).))................(((((..((((.......)))).))).))............................)).	33	33	30	24
653	772	37	-34	-0.74	0.23	35.89	0.007529	GGAACCAGATGACGTCGATTGTTGGTGCAACACGACGTCAACTTGGGTTGTGTACGGAACCTGCCATCACAAAAAAGGTGAAGCACGGAGATCTAGAAGAGCTGTGACGCTCCCCTCCCA	(((...((.((((((((..(((((...))))))))))))).)).(((..((((((((..(((((..((((.......)))).))).)).............)))).))))..))))))..	.......(.((((((((..(((((...))))))))))))).).................(((((...(((.......)))..))).))................................	34	33	30	23
654	773	37	-33.6	-0.74	0.25	34.5	0.0161751	GAACCAGATGACGTCGATTGTTGGTGCAACACGACGTCAACTTGGGTTGTGTACGGAACCTGCCATCACAAAAAAGGTGAAGCACGGAGATCTAGAAGAGCTGTGACGCTCCCCTCCCAT	.....((.((((((((..(((((...))))))))))))).)).(((..((((((((..(((((..((((.......)))).))).)).............)))).))))..)))......	.....((.((((((((..(((((...))))))))))))).))..................(((..................)))....................................	34	32	30	24
655	774	37	-33.6	-1.13	0.17	34.02	0.0186	AACCAGATGACGTCGATTGTTGGTGCAACACGACGTCAACTTGGGTTGTGTACGGAACCTGCCATCACAAAAAAGGTGAAGCACGGAGATCTAGAAGAGCTGTGACGCTCCCCTCCCATT	....((.((((((((..(((((...))))))))))))).)).(((..((((((((..(((((..((((.......)))).))).)).............)))).))))..))).......	....((.((((((((..(((((...))))))))))))).))..................(((..................))).....................................	34	31	30	25
656	775	37	-33.6	-0.78	0.11	33.28	0.0205925	ACCAGATGACGTCGATTGTTGGTGCAACACGACGTCAACTTGGGTTGTGTACGGAACCTGCCATCACAAAAAAGGTGAAGCACGGAGATCTAGAAGAGCTGTGACGCTCCCCTCCCATTC	...((.((((((((..(((((...))))))))))))).)).(((..((((((((..(((((..((((.......)))).))).)).............)))).))))..)))........	...((.((((((((..(((((...))))))))))))).))................(((((...((.........))..))).))...................................	33	31	31	25
657	776	37	-33.6	-0.96	0.17	33.85	0.0190445	CCAGATGACGTCGATTGTTGGTGCAACACGACGTCAACTTGGGTTGTGTACGGAACCTGCCATCACAAAAAAGGTGAAGCACGGAGATCTAGAAGAGCTGTGACGCTCCCCTCCCATTCC	..((.((((((((..(((((...))))))))))))).)).(((..((((((((..(((((..((((.......)))).))).)).............)))).))))..))).........	..((.((((((((..(((((...))))))))))))).))..................(((...(((.......)))..))).......................................	32	31	32	25
658	777	37	-33.6	-1.14	0.11	30.24	0.0201356	CAGATGACGTCGATTGTTGGTGCAACACGACGTCAACTTGGGTTGTGTACGGAACCTGCCATCACAAAAAAGGTGAAGCACGGAGATCTAGAAGAGCTGTGACGCTCCCCTCCCATTCCA	.((.((((((((..(((((...))))))))))))).)).(((..((((((((..(((((..((((.......)))).))).)).............)))).))))..)))..........	.((.((((((((..(((((...))))))))))))).))..................(((..((((.......)))).)))........................................	33	31	31	25
659	778	37	-33.1	-0.64	0.13	30.74	0.0145161	AGATGACGTCGATTGTTGGTGCAACACGACGTCAACTTGGGTTGTGTACGGAACCTGCCATCACAAAAAAGGTGAAGCACGGAGATCTAGAAGAGCTGTGACGCTCCCCTCCCATTCCAC	((.((((((((..(((((...))))))))))))).)).(((..((((((((..(((((..((((.......)))).))).)).............)))).))))..)))...........	.(.((((((((..(((((...))))))))))))).)...................(((..((((.......)))).))).........................................	33	31	31	25
660	779	37	-32.9	-0.71	0.21	30.67	0.0167596	GATGACGTCGATTGTTGGTGCAACACGACGTCAACTTGGGTTGTGTACGGAACCTGCCATCACAAAAAAGGTGAAGCACGGAGATCTAGAAGAGCTGTGACGCTCCCCTCCCATTCCACT	..((((((((..(((((...)))))))))))))....(((..((((((((..(((((..((((.......)))).))).)).............)))).))))..)))............	..((((((((..(((((...))))))))))))).....................(((..((((.......)))).)))..........................................	32	31	31	26
661	780	37	-32.9	-1.44	0.05	30.77	0.0248519	ATGACGTCGATTGTTGGTGCAACACGACGTCAACTTGGGTTGTGTACGGAACCTGCCATCACAAAAAAGGTGAAGCACGGAGATCTAGAAGAGCTGTGACGCTCCCCTCCCATTCCACTA	.((((((((..(((((...)))))))))))))....(((..((((((((..(((((..((((.......)))).))).)).............)))).))))..))).............	.((((((((..(((((...))))))))))))).....................(((..((((.......)))).)))...........................................	33	30	31	26
662	781	37	-32.9	-0.65	0.23	30.87	0.0244668	TGACGTCGATTGTTGGTGCAACACGACGTCAACTTGGGTTGTGTACGGAACCTGCCATCACAAAAAAGGTGAAGCACGGAGATCTAGAAGAGCTGTGACGCTCCCCTCCCATTCCACTAG	((((((((..(((((...)))))))))))))....(((..((((((((..(((((..((((.......)))).))).)).............)))).))))..)))..............	((((((((..(((((...))))))))))))).....................(((..((((.......)))).)))............................................	32	31	31	26
663	782	37	-32.2	-0.32	0.27	32.08	0.0199751	GACGTCGATTGTTGGTGCAACACGACGTCAACTTGGGTTGTGTACGGAACCTGCCATCACAAAAAAGGTGAAGCACGGAGATCTAGAAGAGCTGTGACGCTCCCCTCCCATTCCACTAGG	(((((((..(((((...)))))))))))).....(((..((((((((..(((((..((((.......)))).))).)).............)))).))))..)))...............	(((((((..(((((...))))))))))))......................(((..((((.......)))).))).............................................	32	32	31	25
664	783	37	-29	0.148	0.49	31.64	0.0191795	ACGTCGATTGTTGGTGCAACACGACGTCAACTTGGGTTGTGTACGGAACCTGCCATCACAAAAAAGGTGAAGCACGGAGATCTAGAAGAGCTGTGACGCTCCCCTCCCATTCCACTAGGA	((((((..(((((...)))))))))))......(((..((((((((..(((((..((((.......)))).))).)).............)))).))))..)))......(((....)))	((((((..(((((...)))))))))))......(((..(((.((((..(((((..((((.......)))).))).)).............))))..)))..)))......(((....)))	33	31	31	25
665	784	37	-28.8	0.169	0.52	37.38	0.0180073	CGTCGATTGTTGGTGCAACACGACGTCAACTTGGGTTGTGTACGGAACCTGCCATCACAAAAAAGGTGAAGCACGGAGATCTAGAAGAGCTGTGACGCTCCCCTCCCATTCCACTAGGAA	(((((..(((((...)))))))))).......(((..((((((((..(((((..((((.......)))).))).)).............)))).))))..))).....((((....))))	(((((..(((((...))))))))))............(((..(....(((((..((((.......)))).))).))...............)...)))..........((((....))))	33	31	31	25
666	785	37	-28	0.667	0.76	36.96	0.00890323	GTCGATTGTTGGTGCAACACGACGTCAACTTGGGTTGTGTACGGAACCTGCCATCACAAAAAAGGTGAAGCACGGAGATCTAGAAGAGCTGTGACGCTCCCCTCCCATTCCACTAGGAAG	((((..(((((...)))))))))........(((..((((((((..(((((..((((.......)))).))).)).............)))).))))..))).....((((....)))).	...((......((((.(((((((..........))))))).............((((.......)))).)))).....)).....((((......))))........((((....)))).	33	32	30	25
667	786	37	-27.9	0.641	0.8	18.09	0.0117429	TCGATTGTTGGTGCAACACGACGTCAACTTGGGTTGTGTACGGAACCTGCCATCACAAAAAAGGTGAAGCACGGAGATCTAGAAGAGCTGTGACGCTCCCCTCCCATTCCACTAGGAAGC	..((((.((.((((.(((((((.(((...))))))))))..((......)).((((.......)))).)))).)))))).....((((......))))........((((....))))..	..((((.((.((((.(((((((..........)))))))..((......)).((((.......)))).)))).)))))).....((((......))))........((((....))))..	33	31	31	25
668	787	37	-27.9	0.472	0.64	19.14	0.0121392	CGATTGTTGGTGCAACACGACGTCAACTTGGGTTGTGTACGGAACCTGCCATCACAAAAAAGGTGAAGCACGGAGATCTAGAAGAGCTGTGACGCTCCCCTCCCATTCCACTAGGAAGCT	.((((.((.((((.(((((((.(((...))))))))))..((......)).((((.......)))).)))).)))))).....((((......))))........((((....))))...	.((((.((.((((.(((((((..........)))))))..((......)).((((.......)))).)))).)))))).....((((......))))........((((....))))...	33	31	31	25
669	788	37	-27.7	1.021	0.8	22.54	0.00989798	GATTGTTGGTGCAACACGACGTCAACTTGGGTTGTGTACGGAACCTGCCATCACAAAAAAGGTGAAGCACGGAGATCTAGAAGAGCTGTGACGCTCCCCTCCCATTCCACTAGGAAGCTG	((((.((.((((.(((((((.(((...))))))))))..((......)).((((.......)))).)))).)))))).....((((......))))........((((....))))....	((((.((.((((.(((((((..........)))))))..((......)).((((.......)))).)))).)))))).....((((......))))........((((....))))....	33	32	30	25
670	789	37	-26.2	0.923	0.84	28.9	0.00600256	ATTGTTGGTGCAACACGACGTCAACTTGGGTTGTGTACGGAACCTGCCATCACAAAAAAGGTGAAGCACGGAGATCTAGAAGAGCTGTGACGCTCCCCTCCCATTCCACTAGGAAGCTGC	.......((((.(((((((.(((...))))))))))..((......)).((((.......)))).))))((((........((((......))))..))))..((((....)))).....	............(((((((..........))))))).............((((.......)))).................((((......))))........((((....)))).....	33	31	31	25
671	790	37	-26.6	0.748	0.8	24.67	0.00486404	TTGTTGGTGCAACACGACGTCAACTTGGGTTGTGTACGGAACCTGCCATCACAAAAAAGGTGAAGCACGGAGATCTAGAAGAGCTGTGACGCTCCCCTCCCATTCCACTAGGAAGCTGCA	.......(((((((((((.(((...))))))))))..(((.(((((..((((.......)))).))).))...)))....((((......))))........((((....))))..))))	...........(((((((..........)))))))......(((((..((((.......)))).))).))..........((((......))))........((((....))))......	33	31	31	25
672	791	37	-27.2	0.634	0.68	21.18	0.00837097	TGTTGGTGCAACACGACGTCAACTTGGGTTGTGTACGGAACCTGCCATCACAAAAAAGGTGAAGCACGGAGATCTAGAAGAGCTGTGACGCTCCCCTCCCATTCCACTAGGAAGCTGCAA	......(((((((((((.(((...))))))))))..(((.(((((..((((.......)))).))).))...)))....((((......))))........((((....))))..)))).	.......((((((((((..........)))))))......(((((..((((.......)))).))).))..........((((......))))........((((....))))..)))..	34	31	31	24
673	792	37	-27.2	0.272	0.54	19.89	0.00869229	GTTGGTGCAACACGACGTCAACTTGGGTTGTGTACGGAACCTGCCATCACAAAAAAGGTGAAGCACGGAGATCTAGAAGAGCTGTGACGCTCCCCTCCCATTCCACTAGGAAGCTGCAAA	.....(((((((((((.(((...))))))))))..(((.(((((..((((.......)))).))).))...)))....((((......))))........((((....))))..))))..	.....(((((((((((..........)))))))......(((((..((((.......)))).))).))..........((((......))))........((((....))))..))))..	35	31	31	23
674	793	37	-27.2	0.351	0.64	18.31	0.0090743	TTGGTGCAACACGACGTCAACTTGGGTTGTGTACGGAACCTGCCATCACAAAAAAGGTGAAGCACGGAGATCTAGAAGAGCTGTGACGCTCCCCTCCCATTCCACTAGGAAGCTGCAAAC	....(((((((((((.(((...))))))))))..(((.(((((..((((.......)))).))).))...)))....((((......))))........((((....))))..))))...	....(((((((((((..........)))))))......(((((..((((.......)))).))).))..........((((......))))........((((....))))..))))...	35	30	32	23
675	794	37	-27.2	0.589	0.68	16.54	0.00799678	TGGTGCAACACGACGTCAACTTGGGTTGTGTACGGAACCTGCCATCACAAAAAAGGTGAAGCACGGAGATCTAGAAGAGCTGTGACGCTCCCCTCCCATTCCACTAGGAAGCTGCAAACG	...(((((((((((.(((...))))))))))..(((.(((((..((((.......)))).))).))...)))....((((......))))........((((....))))..))))....	...(((((((((((..........)))))))...(..(((((..((((.......)))).))).))....).....((((......))))........((((....))))..))))....	35	31	32	22
676	795	37	-27.2	0.711	0.76	16.86	0.00793265	GGTGCAACACGACGTCAACTTGGGTTGTGTACGGAACCTGCCATCACAAAAAAGGTGAAGCACGGAGATCTAGAAGAGCTGTGACGCTCCCCTCCCATTCCACTAGGAAGCTGCAAACGC	..(((((((((((.(((...))))))))))..(((.(((((..((((.......)))).))).))...)))....((((......))))........((((....))))..)))).....	..(((((((((((..........)))))))......(((((..((((.......)))).))).))..........((((......))))........((((....))))..)))).....	35	31	33	21
677	796	37	-27.2	0.33	0.6	21.44	0.00684523	GTGCAACACGACGTCAACTTGGGTTGTGTACGGAACCTGCCATCACAAAAAAGGTGAAGCACGGAGATCTAGAAGAGCTGTGACGCTCCCCTCCCATTCCACTAGGAAGCTGCAAACGCG	.(((((((((((.(((...))))))))))..(((.(((((..((((.......)))).))).))...)))....((((......))))........((((....))))..))))......	..((.(((((((..........)))))))......(((((..((((.......)))).))).))..........((((......))))........((((....))))...)).......	35	31	33	21
678	797	37	-27.2	0.437	0.6	17.63	0.0078341	TGCAACACGACGTCAACTTGGGTTGTGTACGGAACCTGCCATCACAAAAAAGGTGAAGCACGGAGATCTAGAAGAGCTGTGACGCTCCCCTCCCATTCCACTAGGAAGCTGCAAACGCGG	(((((((((((.(((...))))))))))..(((.(((((..((((.......)))).))).))...)))....((((......))))........((((....))))..)))).......	.((.(((((((..........)))))))......(((((..((((.......)))).))).))..........((((......))))........((((....))))...))........	35	31	33	21
679	798	37	-28.7	0.454	0.66	14.53	0.0117901	GCAACACGACGTCAACTTGGGTTGTGTACGGAACCTGCCATCACAAAAAAGGTGAAGCACGGAGATCTAGAAGAGCTGTGACGCTCCCCTCCCATTCCACTAGGAAGCTGCAAACGCGGT	...(((((((.(((...))))))))))..(((.(((((..((((.......)))).))).))...)))....((((......))))........((((....))))(((((....)))))	...(((((((..........)))))))......(((((..((((.......)))).))).))..........((((......))))........((((....))))(((((....)))))	35	31	33	21
680	799	37	-29.1	-0.24	0.43	13.37	0.0141791	CAACACGACGTCAACTTGGGTTGTGTACGGAACCTGCCATCACAAAAAAGGTGAAGCACGGAGATCTAGAAGAGCTGTGACGCTCCCCTCCCATTCCACTAGGAAGCTGCAAACGCGGTC	..(((((((.(((...))))))))))..(((.(((((..((((.......)))).))).))...)))....((((......))))........((((....))))(((((....))))).	..(((((((..........)))))))......(((((..((((.......)))).))).))..........((((......))))........((((....))))(((((....))))).	35	30	34	21
681	800	37	-29.1	0.205	0.58	14.23	0.0115349	AACACGACGTCAACTTGGGTTGTGTACGGAACCTGCCATCACAAAAAAGGTGAAGCACGGAGATCTAGAAGAGCTGTGACGCTCCCCTCCCATTCCACTAGGAAGCTGCAAACGCGGTCG	.(((((((.(((...))))))))))..(((.(((((..((((.......)))).))).))...)))....((((......))))........((((....))))(((((....)))))..	.(((((((..........)))))))......(((((..((((.......)))).))).))..........((((......))))........((((....))))(((((....)))))..	35	31	33	21
682	801	37	-28.8	0.478	0.64	15.19	0.00902695	ACACGACGTCAACTTGGGTTGTGTACGGAACCTGCCATCACAAAAAAGGTGAAGCACGGAGATCTAGAAGAGCTGTGACGCTCCCCTCCCATTCCACTAGGAAGCTGCAAACGCGGTCGC	(((((((.(((...))))))))))..(((.(((((..((((.......)))).))).))...)))....((((......))))........((((....))))(((((....)))))...	(((((((..........)))))))......(((((..((((.......)))).))).))..........((((......))))........((((....))))(((((....)))))...	34	31	34	21
683	802	37	-27	0.768	0.72	25.09	0.00630998	CACGACGTCAACTTGGGTTGTGTACGGAACCTGCCATCACAAAAAAGGTGAAGCACGGAGATCTAGAAGAGCTGTGACGCTCCCCTCCCATTCCACTAGGAAGCTGCAAACGCGGTCGCA	((((((.(((...)))))))))...(((.(((((..((((.......)))).))).))...)))....((((......))))........((((....))))(((((....)))))....	((((((..........)))))).......(((((..((((.......)))).))).))..........((((......))))........((((....))))(((((....)))))....	34	31	34	21
684	803	37	-26.2	1.06	0.84	35.11	0.00626177	ACGACGTCAACTTGGGTTGTGTACGGAACCTGCCATCACAAAAAAGGTGAAGCACGGAGATCTAGAAGAGCTGTGACGCTCCCCTCCCATTCCACTAGGAAGCTGCAAACGCGGTCGCAA	.............(((..((((((((..(((((..((((.......)))).))).)).............)))).))))..))).....((((....))))(((((....))))).....	..............................(((..((((.......)))).))).............((((......))))........((((....))))(((((....))))).....	35	31	33	21
685	804	37	-26.2	0.87	0.84	34.9	0.0109172	CGACGTCAACTTGGGTTGTGTACGGAACCTGCCATCACAAAAAAGGTGAAGCACGGAGATCTAGAAGAGCTGTGACGCTCCCCTCCCATTCCACTAGGAAGCTGCAAACGCGGTCGCAAA	............(((..((((((((..(((((..((((.......)))).))).)).............)))).))))..))).....((((....))))(((((....)))))......	.............................(((..((((.......)))).))).............((((......))))........((((....))))(((((....)))))......	35	31	33	21
686	805	37	-26.2	0.715	0.68	33.17	0.0182165	GACGTCAACTTGGGTTGTGTACGGAACCTGCCATCACAAAAAAGGTGAAGCACGGAGATCTAGAAGAGCTGTGACGCTCCCCTCCCATTCCACTAGGAAGCTGCAAACGCGGTCGCAAAC	...........(((..((((((((..(((((..((((.......)))).))).)).............)))).))))..))).....((((....))))(((((....))))).......	..........................(((((..((((.......)))).))).))................................((((....))))(((((....))))).......	35	31	33	21
687	806	37	-26.4	0.606	0.68	26.92	0.0134685	ACGTCAACTTGGGTTGTGTACGGAACCTGCCATCACAAAAAAGGTGAAGCACGGAGATCTAGAAGAGCTGTGACGCTCCCCTCCCATTCCACTAGGAAGCTGCAAACGCGGTCGCAAACC	..........((..((((...(((.(((((..((((.......)))).))).))...)))....((((......))))........((((....))))(((((....)))))))))..))	..............((((.......(((((..((((.......)))).))).))..........((((......))))........((((....))))(((((....)))))))))....	35	30	34	21
688	807	37	-27.6	0.31	0.6	18.5	0.0119963	CGTCAACTTGGGTTGTGTACGGAACCTGCCATCACAAAAAAGGTGAAGCACGGAGATCTAGAAGAGCTGTGACGCTCCCCTCCCATTCCACTAGGAAGCTGCAAACGCGGTCGCAAACCT	.........((..((((...(((.(((((..((((.......)))).))).))...)))....((((......))))........((((....))))(((((....)))))))))..)).	.........(((.((((....(..(((((..((((.......)))).))).))....).....((((......))))........((((....))))(((((....)))))))))..)))	34	30	34	22
689	808	37	-28.1	0.265	0.5	17.43	0.0124117	GTCAACTTGGGTTGTGTACGGAACCTGCCATCACAAAAAAGGTGAAGCACGGAGATCTAGAAGAGCTGTGACGCTCCCCTCCCATTCCACTAGGAAGCTGCAAACGCGGTCGCAAACCTG	........((((((((...(((.(((((..((((.......)))).))).))...)))....((((......))))........((((....))))(((((....)))))))).))))).	........((((((((....((.(((((..((((.......)))).))).))...)).....((((......))))........((((....))))(((((....))))))))).)))).	34	31	33	22
690	809	37	-28.1	0.601	0.64	19.89	0.00578935	TCAACTTGGGTTGTGTACGGAACCTGCCATCACAAAAAAGGTGAAGCACGGAGATCTAGAAGAGCTGTGACGCTCCCCTCCCATTCCACTAGGAAGCTGCAAACGCGGTCGCAAACCTGG	.......((((((((...(((.(((((..((((.......)))).))).))...)))....((((......))))........((((....))))(((((....)))))))).)))))..	.......((((((((....(..(((((..((((.......)))).))).))....).....((((......))))........((((....))))(((((....))))))))).))))..	34	31	33	22
691	810	37	-29.4	0.074	0.43	23.08	0.013156	CAACTTGGGTTGTGTACGGAACCTGCCATCACAAAAAAGGTGAAGCACGGAGATCTAGAAGAGCTGTGACGCTCCCCTCCCATTCCACTAGGAAGCTGCAAACGCGGTCGCAAACCTGGT	..(((.((..((((...(((.(((((..((((.......)))).))).))...)))....((((......))))........((((....))))(((((....)))))))))..)).)))	...(......((((.......(((((..((((.......)))).))).))..........((((......))))........((((....))))(((((....)))))))))......).	34	31	33	22
692	811	37	-30	-0.01	0.49	20.25	0.0124378	AACTTGGGTTGTGTACGGAACCTGCCATCACAAAAAAGGTGAAGCACGGAGATCTAGAAGAGCTGTGACGCTCCCCTCCCATTCCACTAGGAAGCTGCAAACGCGGTCGCAAACCTGGTT	((((.((..((((...(((.(((((..((((.......)))).))).))...)))....((((......))))........((((....))))(((((....)))))))))..)).))))	.(((.((..((((....(..(((((..((((.......)))).))).))....).....((((......))))........((((....))))(((((....)))))))))..)).))).	34	31	32	23
693	812	37	-29.2	0.451	0.58	26.27	0.0102065	ACTTGGGTTGTGTACGGAACCTGCCATCACAAAAAAGGTGAAGCACGGAGATCTAGAAGAGCTGTGACGCTCCCCTCCCATTCCACTAGGAAGCTGCAAACGCGGTCGCAAACCTGGTTG	(((.((..((((...(((.(((((..((((.......)))).))).))...)))....((((......))))........((((....))))(((((....)))))))))..)).)))..	.(......((((.......(((((..((((.......)))).))).))..........((((......))))........((((....))))(((((....)))))))))......)...	33	32	32	23
694	813	37	-30.2	0.532	0.64	29.83	0.0162962	CTTGGGTTGTGTACGGAACCTGCCATCACAAAAAAGGTGAAGCACGGAGATCTAGAAGAGCTGTGACGCTCCCCTCCCATTCCACTAGGAAGCTGCAAACGCGGTCGCAAACCTGGTTGG	...(((..((((((((..(((((..((((.......)))).))).)).............)))).))))..))).......((((((((..(((((....)))))......))))).)))	...(((..(((.((((..(((((..((((.......)))).))).)).............))))..)))..))).......((((((((..(((((....)))))......)))))).))	32	33	32	23
695	814	37	-32.2	-0.29	0.31	24.94	0.0174555	TTGGGTTGTGTACGGAACCTGCCATCACAAAAAAGGTGAAGCACGGAGATCTAGAAGAGCTGTGACGCTCCCCTCCCATTCCACTAGGAAGCTGCAAACGCGGTCGCAAACCTGGTTGGA	..(((..((((((((..(((((..((((.......)))).))).)).............)))).))))..)))......(((((((((..(((((....)))))......))))).))))	..(((..(((.((((..(((((..((((.......)))).))).))....(.....)..))))..)))..)))......(((((((((..(((((....)))))......)))))).)))	33	33	31	23
696	815	37	-33.2	-0.66	0.25	23.15	0.0149305	TGGGTTGTGTACGGAACCTGCCATCACAAAAAAGGTGAAGCACGGAGATCTAGAAGAGCTGTGACGCTCCCCTCCCATTCCACTAGGAAGCTGCAAACGCGGTCGCAAACCTGGTTGGAA	.(((..((((((((..(((((..((((.......)))).))).)).............)))).))))..))).....((((((((((..(((((....)))))......))))).)))))	.(((..(((.((((..(((((..((((.......)))).))).))....(.....)..))))..)))..))).....((((((((((..(((((....)))))......)))))).))))	34	33	31	22
697	816	37	-34.3	-0.92	0.19	17.5	0.0227521	GGGTTGTGTACGGAACCTGCCATCACAAAAAAGGTGAAGCACGGAGATCTAGAAGAGCTGTGACGCTCCCCTCCCATTCCACTAGGAAGCTGCAAACGCGGTCGCAAACCTGGTTGGAAT	(((..((((((((..(((((..((((.......)))).))).)).............)))).))))..)))....(((((((((((..(((((....)))))......))))).))))))	(((..(((.((((..(((((..((((.......)))).))).)).............))))..)))..)))....(((((.(((((..(((((....)))))......)))))..)))))	34	33	31	22
698	817	37	-32.4	-0.82	0.17	21.68	0.038223	GGTTGTGTACGGAACCTGCCATCACAAAAAAGGTGAAGCACGGAGATCTAGAAGAGCTGTGACGCTCCCCTCCCATTCCACTAGGAAGCTGCAAACGCGGTCGCAAACCTGGTTGGAATC	((((........))))(((..((((.......)))).))).((((........((((......))))..)))).(((((((((((..(((((....)))))......))))).)))))).	((((........))))(((..((((.......)))).))).((((........((((......))))..)))).(((((.(((((..(((((....)))))......)))))..))))).	34	32	32	22
699	818	37	-30.7	-0.37	0.41	28.28	0.0198192	GTTGTGTACGGAACCTGCCATCACAAAAAAGGTGAAGCACGGAGATCTAGAAGAGCTGTGACGCTCCCCTCCCATTCCACTAGGAAGCTGCAAACGCGGTCGCAAACCTGGTTGGAATCA	...((((.....((((.............))))...))))((((........((((......))))..)))).(((((((((((..(((((....)))))......))))).))))))..	..((((...............))))................................................(((((.(((((..(((((....)))))......)))))..)))))..	35	31	32	22
700	819	37	-30.7	-0.52	0.27	27.82	0.0210796	TTGTGTACGGAACCTGCCATCACAAAAAAGGTGAAGCACGGAGATCTAGAAGAGCTGTGACGCTCCCCTCCCATTCCACTAGGAAGCTGCAAACGCGGTCGCAAACCTGGTTGGAATCAA	..((((.....((((.............))))...))))((((........((((......))))..)))).(((((((((((..(((((....)))))......))))).))))))...	.((((...((......))..))))................................................(((((.(((((..(((((....)))))......)))))..)))))...	36	30	32	22
701	820	37	-30.7	-0.92	0.19	25.44	0.0395391	TGTGTACGGAACCTGCCATCACAAAAAAGGTGAAGCACGGAGATCTAGAAGAGCTGTGACGCTCCCCTCCCATTCCACTAGGAAGCTGCAAACGCGGTCGCAAACCTGGTTGGAATCAAG	.((((.....((((.............))))...))))((((........((((......))))..)))).(((((((((((..(((((....)))))......))))).))))))....	..................................................((((......)))).......(((((.(((((..(((((....)))))......)))))..)))))....	36	31	32	21
702	821	37	-30.9	-0.59	0.17	21.74	0.0509236	GTGTACGGAACCTGCCATCACAAAAAAGGTGAAGCACGGAGATCTAGAAGAGCTGTGACGCTCCCCTCCCATTCCACTAGGAAGCTGCAAACGCGGTCGCAAACCTGGTTGGAATCAAGA	((((.....((((.............))))...))))((((........((((......))))..)))).(((((((((((..(((((....)))))......))))).)))))).....	(((...............................)))............((((......)))).......(((((.(((((..(((((....)))))......)))))..))))).....	37	31	32	20
703	822	37	-31	-0.8	0.13	12.13	0.0546253	TGTACGGAACCTGCCATCACAAAAAAGGTGAAGCACGGAGATCTAGAAGAGCTGTGACGCTCCCCTCCCATTCCACTAGGAAGCTGCAAACGCGGTCGCAAACCTGGTTGGAATCAAGAG	.....(((.(((((..((((.......)))).))).))...)))....((((......))))..(((..(((((((((((..(((((....)))))......))))).))))))...)))	.....(((.(((((..((((.......)))).))).))...)))....((((......))))..(((..(((((.(((((..(((((....)))))......)))))..)))))...)))	37	31	32	20
704	823	37	-32.2	-1.62	0.03	9.78	0.0824851	GTACGGAACCTGCCATCACAAAAAAGGTGAAGCACGGAGATCTAGAAGAGCTGTGACGCTCCCCTCCCATTCCACTAGGAAGCTGCAAACGCGGTCGCAAACCTGGTTGGAATCAAGAGA	....(((.(((((..((((.......)))).))).))...)))....((((......))))..(((..(((((((((((..(((((....)))))......))))).))))))...))).	....(((.(((((..((((.......)))).))).))...)))....((((......))))..(((..(((((.(((((..(((((....)))))......)))))..)))))...))).	38	31	32	19
705	824	37	-32.2	-1.88	0.01	9.48	0.0828919	TACGGAACCTGCCATCACAAAAAAGGTGAAGCACGGAGATCTAGAAGAGCTGTGACGCTCCCCTCCCATTCCACTAGGAAGCTGCAAACGCGGTCGCAAACCTGGTTGGAATCAAGAGAA	...(((.(((((..((((.......)))).))).))...)))....((((......))))..(((..(((((((((((..(((((....)))))......))))).))))))...)))..	...(((.(((((..((((.......)))).))).))...)))....((((......))))..(((..(((((.(((((..(((((....)))))......)))))..)))))...)))..	39	30	32	19
706	825	37	-32.2	-1.94	0.03	9.45	0.0865369	ACGGAACCTGCCATCACAAAAAAGGTGAAGCACGGAGATCTAGAAGAGCTGTGACGCTCCCCTCCCATTCCACTAGGAAGCTGCAAACGCGGTCGCAAACCTGGTTGGAATCAAGAGAAT	..(((.(((((..((((.......)))).))).))...)))....((((......))))..(((..(((((((((((..(((((....)))))......))))).))))))...)))...	..(((.(((((..((((.......)))).))).))...)))....((((......))))..(((..(((((.(((((..(((((....)))))......)))))..)))))...)))...	39	30	32	19
707	826	37	-32.2	-1.79	0.03	9.42	0.0866506	CGGAACCTGCCATCACAAAAAAGGTGAAGCACGGAGATCTAGAAGAGCTGTGACGCTCCCCTCCCATTCCACTAGGAAGCTGCAAACGCGGTCGCAAACCTGGTTGGAATCAAGAGAATA	.(((.(((((..((((.......)))).))).))...)))....((((......))))..(((..(((((((((((..(((((....)))))......))))).))))))...)))....	.(((.(((((..((((.......)))).))).))...)))....((((......))))..(((..(((((.(((((..(((((....)))))......)))))..)))))...)))....	39	30	32	19
708	827	37	-32.1	-1.47	0.05	9.43	0.088979	GGAACCTGCCATCACAAAAAAGGTGAAGCACGGAGATCTAGAAGAGCTGTGACGCTCCCCTCCCATTCCACTAGGAAGCTGCAAACGCGGTCGCAAACCTGGTTGGAATCAAGAGAATAC	(((.(((((..((((.......)))).))).))...)))....((((......))))..(((..(((((((((((..(((((....)))))......))))).))))))...))).....	(((.(((((..((((.......)))).))).))...)))....((((......))))..(((..(((((.(((((..(((((....)))))......)))))..)))))...))).....	39	30	32	19
709	828	37	-31.5	-1.31	0.07	9.26	0.0942953	GAACCTGCCATCACAAAAAAGGTGAAGCACGGAGATCTAGAAGAGCTGTGACGCTCCCCTCCCATTCCACTAGGAAGCTGCAAACGCGGTCGCAAACCTGGTTGGAATCAAGAGAATACA	...(((((..((((.......)))).))).))..........((((......))))..(((..(((((((((((..(((((....)))))......))))).))))))...)))......	...(((((..((((.......)))).))).))..........((((......))))..(((..(((((.(((((..(((((....)))))......)))))..)))))...)))......	40	29	32	19
710	829	37	-31.5	-2.03	0.03	9.08	0.132151	AACCTGCCATCACAAAAAAGGTGAAGCACGGAGATCTAGAAGAGCTGTGACGCTCCCCTCCCATTCCACTAGGAAGCTGCAAACGCGGTCGCAAACCTGGTTGGAATCAAGAGAATACAC	..(((((..((((.......)))).))).))..........((((......))))..(((..(((((((((((..(((((....)))))......))))).))))))...))).......	..(((((..((((.......)))).))).))..........((((......))))..(((..(((((.(((((..(((((....)))))......)))))..)))))...))).......	40	28	33	19
711	830	37	-31.5	-2.05	0.01	9.11	0.131555	ACCTGCCATCACAAAAAAGGTGAAGCACGGAGATCTAGAAGAGCTGTGACGCTCCCCTCCCATTCCACTAGGAAGCTGCAAACGCGGTCGCAAACCTGGTTGGAATCAAGAGAATACACA	.(((((..((((.......)))).))).))..........((((......))))..(((..(((((((((((..(((((....)))))......))))).))))))...)))........	.(((((..((((.......)))).))).))..........((((......))))..(((..(((((.(((((..(((((....)))))......)))))..)))))...)))........	40	28	33	19
712	831	37	-31.5	-1.92	0.01	9.1	0.13232	CCTGCCATCACAAAAAAGGTGAAGCACGGAGATCTAGAAGAGCTGTGACGCTCCCCTCCCATTCCACTAGGAAGCTGCAAACGCGGTCGCAAACCTGGTTGGAATCAAGAGAATACACAA	(((((..((((.......)))).))).))..........((((......))))..(((..(((((((((((..(((((....)))))......))))).))))))...))).........	(((((..((((.......)))).))).))..........((((......))))..(((..(((((.(((((..(((((....)))))......)))))..)))))...))).........	40	28	33	19
713	832	37	-29.4	-1.42	0.11	17.21	0.0376629	CTGCCATCACAAAAAAGGTGAAGCACGGAGATCTAGAAGAGCTGTGACGCTCCCCTCCCATTCCACTAGGAAGCTGCAAACGCGGTCGCAAACCTGGTTGGAATCAAGAGAATACACAAA	.(((..((((.......)))).))).((((.(((((.....))).))..)))).(((..(((((((((((..(((((....)))))......))))).))))))...)))..........	.(((..((((.......)))).))).............................(((..(((((.(((((..(((((....)))))......)))))..)))))...)))..........	41	28	32	19
714	833	37	-29.2	-1.35	0.13	17.43	0.0372165	TGCCATCACAAAAAAGGTGAAGCACGGAGATCTAGAAGAGCTGTGACGCTCCCCTCCCATTCCACTAGGAAGCTGCAAACGCGGTCGCAAACCTGGTTGGAATCAAGAGAATACACAAAG	(((..((((.......)))).))).((((.(((((.....))).))..)))).(((..(((((((((((..(((((....)))))......))))).))))))...)))...........	(((..((((.......)))).))).((((...................)))).(((..(((((.(((((..(((((....)))))......)))))..)))))...)))...........	41	29	31	19
715	834	37	-28.8	-1.42	0.09	18.88	0.0425748	GCCATCACAAAAAAGGTGAAGCACGGAGATCTAGAAGAGCTGTGACGCTCCCCTCCCATTCCACTAGGAAGCTGCAAACGCGGTCGCAAACCTGGTTGGAATCAAGAGAATACACAAAGC	((..((((.......)))).))..((((.(((((.....))).))..)))).(((..(((((((((((..(((((....)))))......))))).))))))...)))............	((..((((.......)))).))..............................(((..(((((.(((((..(((((....)))))......)))))..)))))...)))............	41	29	32	18
716	835	37	-27.1	-0.91	0.15	21.97	0.00993116	CCATCACAAAAAAGGTGAAGCACGGAGATCTAGAAGAGCTGTGACGCTCCCCTCCCATTCCACTAGGAAGCTGCAAACGCGGTCGCAAACCTGGTTGGAATCAAGAGAATACACAAAGCA	.((((........))))......((((.(((((.....))).))..)))).(((..(((((((((((..(((((....)))))......))))).))))))...))).............	...................................................(((..(((((.(((((..(((((....)))))......)))))..)))))...))).............	42	28	32	18
717	836	37	-27	-1.04	0.15	21.83	0.0104577	CATCACAAAAAAGGTGAAGCACGGAGATCTAGAAGAGCTGTGACGCTCCCCTCCCATTCCACTAGGAAGCTGCAAACGCGGTCGCAAACCTGGTTGGAATCAAGAGAATACACAAAGCAC	..((((.......)))).....((((.(((((.....))).))..)))).(((..(((((((((((..(((((....)))))......))))).))))))...)))..............	..................................................(((..(((((.(((((..(((((....)))))......)))))..)))))...)))..............	42	28	32	18
718	837	37	-27	-0.91	0.15	20.92	0.0134704	ATCACAAAAAAGGTGAAGCACGGAGATCTAGAAGAGCTGTGACGCTCCCCTCCCATTCCACTAGGAAGCTGCAAACGCGGTCGCAAACCTGGTTGGAATCAAGAGAATACACAAAGCACT	.((((.......)))).....((((.(((((.....))).))..)))).(((..(((((((((((..(((((....)))))......))))).))))))...)))...............	..(((.......)))............(.....)...............(((..(((((.(((((..(((((....)))))......)))))..)))))...)))...............	42	28	31	19
719	838	37	-27	-0.81	0.19	21.8	0.0117797	TCACAAAAAAGGTGAAGCACGGAGATCTAGAAGAGCTGTGACGCTCCCCTCCCATTCCACTAGGAAGCTGCAAACGCGGTCGCAAACCTGGTTGGAATCAAGAGAATACACAAAGCACTT	((((.......)))).....((((.(((((.....))).))..)))).(((..(((((((((((..(((((....)))))......))))).))))))...)))................	................................................(((..(((((.(((((..(((((....)))))......)))))..)))))...)))................	41	28	31	20
720	839	37	-26.9	-0.92	0.19	21.86	0.0122822	CACAAAAAAGGTGAAGCACGGAGATCTAGAAGAGCTGTGACGCTCCCCTCCCATTCCACTAGGAAGCTGCAAACGCGGTCGCAAACCTGGTTGGAATCAAGAGAATACACAAAGCACTTG	........(((((......((((.(((((.....))).))..)))).(((..(((((((((((..(((((....)))))......))))).))))))...)))...........))))).	........................((.....))..............(((..(((((.(((((..(((((....)))))......)))))..)))))...))).................	41	29	31	19
721	840	37	-26.9	-0.89	0.17	24.31	0.00838123	ACAAAAAAGGTGAAGCACGGAGATCTAGAAGAGCTGTGACGCTCCCCTCCCATTCCACTAGGAAGCTGCAAACGCGGTCGCAAACCTGGTTGGAATCAAGAGAATACACAAAGCACTTGA	.......(((((......((((.(((((.....))).))..)))).(((..(((((((((((..(((((....)))))......))))).))))))...)))...........)))))..	.......................(((...)))..............(((..(((((.(((((..(((((....)))))......)))))..)))))...)))..................	42	29	30	19
722	841	37	-26.9	-0.73	0.19	25.16	0.00627142	CAAAAAAGGTGAAGCACGGAGATCTAGAAGAGCTGTGACGCTCCCCTCCCATTCCACTAGGAAGCTGCAAACGCGGTCGCAAACCTGGTTGGAATCAAGAGAATACACAAAGCACTTGAT	......(((((......((((.(((((.....))).))..)))).(((..(((((((((((..(((((....)))))......))))).))))))...)))...........)))))...	......................(((...)))...................(((((.(((((..(((((....)))))......)))))..))))).........................	41	29	30	20
723	842	37	-26.9	-0.84	0.17	25.48	0.00484637	AAAAAAGGTGAAGCACGGAGATCTAGAAGAGCTGTGACGCTCCCCTCCCATTCCACTAGGAAGCTGCAAACGCGGTCGCAAACCTGGTTGGAATCAAGAGAATACACAAAGCACTTGATT	.....(((((......((((.(((((.....))).))..)))).(((..(((((((((((..(((((....)))))......))))).))))))...)))...........)))))....	.....................(((...)))....................((((((((((..(((((....)))))......)))))).)))).((((...............))))...	41	29	29	21
724	843	37	-26.9	-0.91	0.19	25.93	0.00402834	AAAAAGGTGAAGCACGGAGATCTAGAAGAGCTGTGACGCTCCCCTCCCATTCCACTAGGAAGCTGCAAACGCGGTCGCAAACCTGGTTGGAATCAAGAGAATACACAAAGCACTTGATTA	....(((((......((((.(((((.....))).))..)))).(((..(((((((((((..(((((....)))))......))))).))))))...)))...........))))).....	....................(((...)))....................((((((((((..(((((....)))))......)))))).))))(((((...............)))))...	41	29	29	21
725	844	37	-26.9	-0.62	0.25	25.66	0.00410173	AAAAGGTGAAGCACGGAGATCTAGAAGAGCTGTGACGCTCCCCTCCCATTCCACTAGGAAGCTGCAAACGCGGTCGCAAACCTGGTTGGAATCAAGAGAATACACAAAGCACTTGATTAG	...(((((......((((.(((((.....))).))..)))).(((..(((((((((((..(((((....)))))......))))).))))))...)))...........)))))......	...................(((...)))....................((((((((((..(((((....)))))......)))))).))))(((((...............)))))....	40	30	29	21
726	845	37	-26.9	-0.42	0.35	26.35	0.00395811	AAAGGTGAAGCACGGAGATCTAGAAGAGCTGTGACGCTCCCCTCCCATTCCACTAGGAAGCTGCAAACGCGGTCGCAAACCTGGTTGGAATCAAGAGAATACACAAAGCACTTGATTAGA	..(((((......((((.(((((.....))).))..)))).(((..(((((((((((..(((((....)))))......))))).))))))...)))...........))))).......	..................(((...)))....................((((((((((..(((((....)))))......)))))).))))(((((...............))))).....	40	30	29	21
727	846	37	-26.9	-0.09	0.45	27.16	0.00365057	AAGGTGAAGCACGGAGATCTAGAAGAGCTGTGACGCTCCCCTCCCATTCCACTAGGAAGCTGCAAACGCGGTCGCAAACCTGGTTGGAATCAAGAGAATACACAAAGCACTTGATTAGAG	.(((((......((((.(((((.....))).))..)))).(((..(((((((((((..(((((....)))))......))))).))))))...)))...........)))))........	.................(((...)))....................((((((((((..(((((....)))))......)))))).))))(((((...............)))))......	39	31	29	21
728	847	37	-27.3	0	0.49	27.51	0.0060917	AGGTGAAGCACGGAGATCTAGAAGAGCTGTGACGCTCCCCTCCCATTCCACTAGGAAGCTGCAAACGCGGTCGCAAACCTGGTTGGAATCAAGAGAATACACAAAGCACTTGATTAGAGT	.((.(...(((((...(((...))).)))))...).)).(((..(((((((((((..(((((....)))))......))))).))))))...)))............((((.....))))	................(((...)))..............(((..(((((((((((..(((((....)))))......)))))).)))))...))).........................	38	31	29	22
729	848	37	-27.4	0.124	0.52	28.1	0.00803023	GGTGAAGCACGGAGATCTAGAAGAGCTGTGACGCTCCCCTCCCATTCCACTAGGAAGCTGCAAACGCGGTCGCAAACCTGGTTGGAATCAAGAGAATACACAAAGCACTTGATTAGAGTC	((.(...(((((...(((...))).)))))...).)).(((..(((((((((((..(((((....)))))......))))).))))))...)))............((((.....)))).	...............(((...)))..............(((..(((((((((((..(((((....)))))......)))))).)))))...)))..........................	37	31	30	22
730	849	37	-26.9	0.353	0.58	26.44	0.00340066	GTGAAGCACGGAGATCTAGAAGAGCTGTGACGCTCCCCTCCCATTCCACTAGGAAGCTGCAAACGCGGTCGCAAACCTGGTTGGAATCAAGAGAATACACAAAGCACTTGATTAGAGTCG	(((...))).((..(((((..(((.(((.........(((..(((((((((((..(((((....)))))......))))).))))))...)))..........))))))..))))).)).	(((...))).....((((..((.((.................(((((.(((((..(((((....)))))......)))))..)))))................)).))....))))....	37	31	30	22
731	850	37	-26.3	-0.12	0.41	25.87	0.00314534	TGAAGCACGGAGATCTAGAAGAGCTGTGACGCTCCCCTCCCATTCCACTAGGAAGCTGCAAACGCGGTCGCAAACCTGGTTGGAATCAAGAGAATACACAAAGCACTTGATTAGAGTCGA	.........((..(((((..(((.(((.........(((..(((((((((((..(((((....)))))......))))).))))))...)))..........))))))..))))).))..	.............((((..((.((.................(((((.(((((..(((((....)))))......)))))..)))))................)).))....)))).....	38	30	30	22
732	851	37	-26.3	-0.2	0.45	26.71	0.00291773	GAAGCACGGAGATCTAGAAGAGCTGTGACGCTCCCCTCCCATTCCACTAGGAAGCTGCAAACGCGGTCGCAAACCTGGTTGGAATCAAGAGAATACACAAAGCACTTGATTAGAGTCGAA	........((..(((((..(((.(((.........(((..(((((((((((..(((((....)))))......))))).))))))...)))..........))))))..))))).))...	............((((.....((.................(((((.(((((..(((((....)))))......)))))..)))))................)).......))))......	39	30	30	21
733	852	37	-26.3	-0.7	0.23	25.58	0.00316295	AAGCACGGAGATCTAGAAGAGCTGTGACGCTCCCCTCCCATTCCACTAGGAAGCTGCAAACGCGGTCGCAAACCTGGTTGGAATCAAGAGAATACACAAAGCACTTGATTAGAGTCGAAA	.......((..(((((..(((.(((.........(((..(((((((((((..(((((....)))))......))))).))))))...)))..........))))))..))))).))....	...........((((..((.((.................(((((.(((((..(((((....)))))......)))))..)))))................)).))....)))).......	40	29	30	21
734	853	37	-26.3	-0.3	0.41	25.27	0.00322536	AGCACGGAGATCTAGAAGAGCTGTGACGCTCCCCTCCCATTCCACTAGGAAGCTGCAAACGCGGTCGCAAACCTGGTTGGAATCAAGAGAATACACAAAGCACTTGATTAGAGTCGAAAA	......((..(((((..(((.(((.........(((..(((((((((((..(((((....)))))......))))).))))))...)))..........))))))..))))).)).....	..........((((..((.((.................(((((.(((((..(((((....)))))......)))))..)))))................)).))....))))........	40	29	30	21
735	854	37	-26.3	-0.42	0.33	25.56	0.00314599	GCACGGAGATCTAGAAGAGCTGTGACGCTCCCCTCCCATTCCACTAGGAAGCTGCAAACGCGGTCGCAAACCTGGTTGGAATCAAGAGAATACACAAAGCACTTGATTAGAGTCGAAAAT	.....((..(((((..(((.(((.........(((..(((((((((((..(((((....)))))......))))).))))))...)))..........))))))..))))).))......	.........((((..((.((.................(((((.(((((..(((((....)))))......)))))..)))))................)).))....)))).........	39	29	30	22
736	855	37	-26.3	-0.26	0.39	23.2	0.00362536	CACGGAGATCTAGAAGAGCTGTGACGCTCCCCTCCCATTCCACTAGGAAGCTGCAAACGCGGTCGCAAACCTGGTTGGAATCAAGAGAATACACAAAGCACTTGATTAGAGTCGAAAATT	....((..(((((..(((.(((.........(((..(((((((((((..(((((....)))))......))))).))))))...)))..........))))))..))))).)).......	........((((((((.((.(((.............(((((.(((((..(((((....)))))......)))))..)))))..........)))...)).)))..)))))..........	39	28	30	23
737	856	37	-26.3	-0.32	0.35	22.41	0.00374435	ACGGAGATCTAGAAGAGCTGTGACGCTCCCCTCCCATTCCACTAGGAAGCTGCAAACGCGGTCGCAAACCTGGTTGGAATCAAGAGAATACACAAAGCACTTGATTAGAGTCGAAAATTG	...((..(((((..(((.(((.........(((..(((((((((((..(((((....)))))......))))).))))))...)))..........))))))..))))).))........	.......((((((((.((.(((.............(((((.(((((..(((((....)))))......)))))..)))))..........)))...)).)))..)))))...........	39	29	29	23
738	857	37	-26.3	0.052	0.47	23.55	0.00351629	CGGAGATCTAGAAGAGCTGTGACGCTCCCCTCCCATTCCACTAGGAAGCTGCAAACGCGGTCGCAAACCTGGTTGGAATCAAGAGAATACACAAAGCACTTGATTAGAGTCGAAAATTGG	..((..(((((..(((.(((.........(((..(((((((((((..(((((....)))))......))))).))))))...)))..........))))))..))))).)).........	......(((((.((.((.(((.............(((((.(((((..(((((....)))))......)))))..)))))..........)))...)).))...)))))............	38	30	29	23
739	858	37	-26.3	-0.06	0.39	24.83	0.00467778	GGAGATCTAGAAGAGCTGTGACGCTCCCCTCCCATTCCACTAGGAAGCTGCAAACGCGGTCGCAAACCTGGTTGGAATCAAGAGAATACACAAAGCACTTGATTAGAGTCGAAAATTGGA	.((..(((((..(((.(((.........(((..(((((((((((..(((((....)))))......))))).))))))...)))..........))))))..))))).))..........	.....((((..((.((.................(((((.(((((..(((((....)))))......)))))..)))))................)).))....)))).............	39	30	28	23
740	859	37	-27.1	-0.55	0.23	25.09	0.0111645	GAGATCTAGAAGAGCTGTGACGCTCCCCTCCCATTCCACTAGGAAGCTGCAAACGCGGTCGCAAACCTGGTTGGAATCAAGAGAATACACAAAGCACTTGATTAGAGTCGAAAATTGGAT	...(((((...((((......))))..(((..(((((((((((..(((((....)))))......))))).))))))...)))..............(((((....)))))....)))))	....((((...................(((..(((((.(((((..(((((....)))))......)))))..)))))...)))...................))))..............	39	29	28	24
741	860	37	-27.8	-1.19	0.09	24.08	0.0218983	AGATCTAGAAGAGCTGTGACGCTCCCCTCCCATTCCACTAGGAAGCTGCAAACGCGGTCGCAAACCTGGTTGGAATCAAGAGAATACACAAAGCACTTGATTAGAGTCGAAAATTGGATA	..(((((...((((......))))..(((..(((((((((((..(((((....)))))......))))).))))))...)))..............(((((....)))))....))))).	..((((....((((......))))..(((..(((((.(((((..(((((....)))))......)))))..)))))...))).................................)))).	40	28	28	24
742	861	37	-27.8	-1.18	0.09	24.53	0.0204811	GATCTAGAAGAGCTGTGACGCTCCCCTCCCATTCCACTAGGAAGCTGCAAACGCGGTCGCAAACCTGGTTGGAATCAAGAGAATACACAAAGCACTTGATTAGAGTCGAAAATTGGATAT	.(((((...((((......))))..(((..(((((((((((..(((((....)))))......))))).))))))...)))..............(((((....)))))....)))))..	..(((....((((......))))..(((..(((((.(((((..(((((....)))))......)))))..)))))...))).................................)))...	39	28	28	25
743	862	37	-27.4	-1.06	0.15	24.82	0.0166331	ATCTAGAAGAGCTGTGACGCTCCCCTCCCATTCCACTAGGAAGCTGCAAACGCGGTCGCAAACCTGGTTGGAATCAAGAGAATACACAAAGCACTTGATTAGAGTCGAAAATTGGATATT	(((((...((((......))))..(((..(((((((((((..(((((....)))))......))))).))))))...)))..............(((((....)))))....)))))...	........((((......))))..(((..(((((.(((((..(((((....)))))......)))))..)))))...)))........................................	39	27	28	26
744	863	37	-27	-0.89	0.17	25.99	0.00830537	TCTAGAAGAGCTGTGACGCTCCCCTCCCATTCCACTAGGAAGCTGCAAACGCGGTCGCAAACCTGGTTGGAATCAAGAGAATACACAAAGCACTTGATTAGAGTCGAAAATTGGATATTC	.......((((......))))..(((..(((((((((((..(((((....)))))......))))).))))))...)))((((..(((.....(((((....)))))...)))..)))).	.......((((......)))).......(((((.(((((..(((((....)))))......)))))..)))))........(...(..........................)...)...	38	27	29	26
745	864	37	-28.1	-1.41	0.05	12.68	0.017444	CTAGAAGAGCTGTGACGCTCCCCTCCCATTCCACTAGGAAGCTGCAAACGCGGTCGCAAACCTGGTTGGAATCAAGAGAATACACAAAGCACTTGATTAGAGTCGAAAATTGGATATTCA	......((((......)))).......(((((((((((..(((((....)))))......))))).)))))).....(((((..(((.....(((((....)))))...)))..))))).	......((((......)))).......(((((.(((((..(((((....)))))......)))))..))))).....(((((..(((......(((......)))....)))..))))).	39	27	29	25
746	865	37	-28.1	-0.79	0.21	12.38	0.0176526	TAGAAGAGCTGTGACGCTCCCCTCCCATTCCACTAGGAAGCTGCAAACGCGGTCGCAAACCTGGTTGGAATCAAGAGAATACACAAAGCACTTGATTAGAGTCGAAAATTGGATATTCAG	.....((((......)))).......(((((((((((..(((((....)))))......))))).)))))).....(((((..(((.....(((((....)))))...)))..)))))..	.....((((......)))).......(((((.(((((..(((((....)))))......)))))..))))).....(((((..(((......(((......)))....)))..)))))..	39	28	28	25
747	866	37	-28.1	-0.9	0.17	17.48	0.0137329	AGAAGAGCTGTGACGCTCCCCTCCCATTCCACTAGGAAGCTGCAAACGCGGTCGCAAACCTGGTTGGAATCAAGAGAATACACAAAGCACTTGATTAGAGTCGAAAATTGGATATTCAGG	....((((......)))).......(((((((((((..(((((....)))))......))))).)))))).....(((((..(((.....(((((....)))))...)))..)))))...	....((((......)))).......(((((.(((((..(((((....)))))......)))))..))))).....(((((..(((......................)))..)))))...	39	29	28	24
748	867	37	-28.5	-1.17	0.09	19.14	0.0128114	GAAGAGCTGTGACGCTCCCCTCCCATTCCACTAGGAAGCTGCAAACGCGGTCGCAAACCTGGTTGGAATCAAGAGAATACACAAAGCACTTGATTAGAGTCGAAAATTGGATATTCAGGA	...((((......))))..(((..(((((((((((..(((((....)))))......))))).))))))...))).............(((((.....(((........)))..))))).	...((((......)))).......(((((.(((((..(((((....)))))......)))))..))))).....(((((..(((......................)))..)))))....	39	29	28	24
749	868	37	-28.7	-1.14	0.09	18.76	0.0167487	AAGAGCTGTGACGCTCCCCTCCCATTCCACTAGGAAGCTGCAAACGCGGTCGCAAACCTGGTTGGAATCAAGAGAATACACAAAGCACTTGATTAGAGTCGAAAATTGGATATTCAGGAA	..((((......))))...(((.(((((((((((..(((((....)))))......))))).)))))).....(((((..(((.....(((((....)))))...)))..))))).))).	..((((......)))).......(((((.(((((..(((((....)))))......)))))..))))).....(((((..(((......................)))..))))).....	40	28	28	24
750	869	37	-28.7	-1.21	0.09	18.82	0.0166484	AGAGCTGTGACGCTCCCCTCCCATTCCACTAGGAAGCTGCAAACGCGGTCGCAAACCTGGTTGGAATCAAGAGAATACACAAAGCACTTGATTAGAGTCGAAAATTGGATATTCAGGAAC	.((((......))))...(((.(((((((((((..(((((....)))))......))))).)))))).....(((((..(((.....(((((....)))))...)))..))))).)))..	.((((......)))).......(((((.(((((..(((((....)))))......)))))..))))).....(((((..(((......................)))..)))))......	39	28	29	24
751	870	37	-28.5	-1.35	0.09	19.29	0.0161876	GAGCTGTGACGCTCCCCTCCCATTCCACTAGGAAGCTGCAAACGCGGTCGCAAACCTGGTTGGAATCAAGAGAATACACAAAGCACTTGATTAGAGTCGAAAATTGGATATTCAGGAACC	((((......))))...(((.(((((((((((..(((((....)))))......))))).)))))).....(((((..(((.....(((((....)))))...)))..))))).)))...	((((......)))).......(((((.(((((..(((((....)))))......)))))..))))).....(((((..(((......................)))..))))).......	38	28	30	24
752	871	37	-25.9	-0.51	0.27	18.72	0.00719517	AGCTGTGACGCTCCCCTCCCATTCCACTAGGAAGCTGCAAACGCGGTCGCAAACCTGGTTGGAATCAAGAGAATACACAAAGCACTTGATTAGAGTCGAAAATTGGATATTCAGGAACCC	.(((((((..(((.......(((((((((((..(((((....)))))......))))).))))))...)))..).)))..))).(((((.....(((........)))..))))).....	.((.(((...(((.......(((((.(((((..(((((....)))))......)))))..)))))...)))....)))...)).(((((.....(((........)))..))))).....	38	27	31	24
753	872	37	-26.1	-0.32	0.31	16.06	0.00796012	GCTGTGACGCTCCCCTCCCATTCCACTAGGAAGCTGCAAACGCGGTCGCAAACCTGGTTGGAATCAAGAGAATACACAAAGCACTTGATTAGAGTCGAAAATTGGATATTCAGGAACCCT	(((((((..(((.......(((((((((((..(((((....)))))......))))).))))))...)))..).)))..))).(((((.....(((........)))..)))))......	((.(((...(((.......(((((.(((((..(((((....)))))......)))))..)))))...)))....)))...)).(((((.....(((........)))..)))))......	37	27	31	25
754	873	37	-24.8	-0.29	0.31	23.91	0.00724373	CTGTGACGCTCCCCTCCCATTCCACTAGGAAGCTGCAAACGCGGTCGCAAACCTGGTTGGAATCAAGAGAATACACAAAGCACTTGATTAGAGTCGAAAATTGGATATTCAGGAACCCTG	.(((((..(((.......(((((((((((..(((((....)))))......))))).))))))...)))..).)))).....(((((.....(((........)))..))))).......	.((((...(((.......(((((.(((((..(((((....)))))......)))))..)))))...)))....))))...........................................	37	27	31	25
755	874	37	-25.7	-0.13	0.43	21.94	0.00753188	TGTGACGCTCCCCTCCCATTCCACTAGGAAGCTGCAAACGCGGTCGCAAACCTGGTTGGAATCAAGAGAATACACAAAGCACTTGATTAGAGTCGAAAATTGGATATTCAGGAACCCTGG	............(((..(((((((((((..(((((....)))))......))))).))))))...)))((((..(((.....(((((....)))))...)))..))))((((...)))).	.(((.............(((((.(((((..(((((....)))))......)))))..)))))..........))).................................((((...)))).	37	28	30	25
756	875	37	-25.7	0.104	0.47	22.93	0.00882106	GTGACGCTCCCCTCCCATTCCACTAGGAAGCTGCAAACGCGGTCGCAAACCTGGTTGGAATCAAGAGAATACACAAAGCACTTGATTAGAGTCGAAAATTGGATATTCAGGAACCCTGGC	...........(((..(((((((((((..(((((....)))))......))))).))))))...)))((((..(((.....(((((....)))))...)))..))))((((...))))..	...........(((..(((((.(((((..(((((....)))))......)))))..)))))...)))........................................((((...))))..	37	28	31	24
757	876	37	-25.8	-0.4	0.29	22.14	0.00881142	TGACGCTCCCCTCCCATTCCACTAGGAAGCTGCAAACGCGGTCGCAAACCTGGTTGGAATCAAGAGAATACACAAAGCACTTGATTAGAGTCGAAAATTGGATATTCAGGAACCCTGGCT	....(((....(((.(((((((((((..(((((....)))))......))))).)))))).....(((((..(((.....(((((....)))))...)))..))))).))).....))).	..........(((..(((((.(((((..(((((....)))))......)))))..)))))...)))((((..(((......................)))..))))((((...))))...	37	27	31	25
758	877	37	-25.8	-0.33	0.33	22.24	0.00784568	GACGCTCCCCTCCCATTCCACTAGGAAGCTGCAAACGCGGTCGCAAACCTGGTTGGAATCAAGAGAATACACAAAGCACTTGATTAGAGTCGAAAATTGGATATTCAGGAACCCTGGCTT	...(((....(((.(((((((((((..(((((....)))))......))))).)))))).....(((((..(((.....(((((....)))))...)))..))))).))).....)))..	.........(((..(((((.(((((..(((((....)))))......)))))..)))))...))).(((..((........................))..))).((((...))))....	37	27	31	25
759	878	37	-25.9	-0.53	0.25	22.02	0.0089109	ACGCTCCCCTCCCATTCCACTAGGAAGCTGCAAACGCGGTCGCAAACCTGGTTGGAATCAAGAGAATACACAAAGCACTTGATTAGAGTCGAAAATTGGATATTCAGGAACCCTGGCTTC	........(((..(((((((((((..(((((....)))))......))))).))))))...)))........((((..(((((....)))))............((((...)))))))).	........(((..(((((.(((((..(((((....)))))......)))))..)))))...))).(((..((........................))..))).((((...)))).....	37	26	32	25
760	879	37	-25.9	-0.23	0.31	23.29	0.00716578	CGCTCCCCTCCCATTCCACTAGGAAGCTGCAAACGCGGTCGCAAACCTGGTTGGAATCAAGAGAATACACAAAGCACTTGATTAGAGTCGAAAATTGGATATTCAGGAACCCTGGCTTCG	.......(((..(((((((((((..(((((....)))))......))))).))))))...)))........((((..(((((....)))))............((((...))))))))..	.......(((..(((((.(((((..(((((....)))))......)))))..)))))...)))........................................((((...))))......	36	27	32	25
761	880	37	-25.9	-0.36	0.35	21.91	0.00714233	GCTCCCCTCCCATTCCACTAGGAAGCTGCAAACGCGGTCGCAAACCTGGTTGGAATCAAGAGAATACACAAAGCACTTGATTAGAGTCGAAAATTGGATATTCAGGAACCCTGGCTTCGC	......(((..(((((((((((..(((((....)))))......))))).))))))...)))........((((..(((((....)))))............((((...))))))))...	......(((..(((((.(((((..(((((....)))))......)))))..)))))...)))........................................((((...)))).......	36	27	32	25
762	881	37	-25.9	-0.08	0.45	19.3	0.00871328	CTCCCCTCCCATTCCACTAGGAAGCTGCAAACGCGGTCGCAAACCTGGTTGGAATCAAGAGAATACACAAAGCACTTGATTAGAGTCGAAAATTGGATATTCAGGAACCCTGGCTTCGCG	.....(((..(((((((((((..(((((....)))))......))))).))))))...)))........((((..(((((....)))))............((((...))))))))....	.....(((..(((((.(((((..(((((....)))))......)))))..)))))...)))........................................((((...))))........	36	27	32	25
763	882	37	-26.8	-0.35	0.33	17.7	0.019719	TCCCCTCCCATTCCACTAGGAAGCTGCAAACGCGGTCGCAAACCTGGTTGGAATCAAGAGAATACACAAAGCACTTGATTAGAGTCGAAAATTGGATATTCAGGAACCCTGGCTTCGCGT	....(((..(((((((((((..(((((....)))))......))))).))))))...)))...((.(.((((..(((((....)))))............((((...)))))))).).))	....(((..(((((.(((((..(((((....)))))......)))))..)))))...)))......(.((((............................((((...)))))))).)...	36	27	31	26
764	883	37	-27.1	-0.6	0.25	16.86	0.0252569	CCCCTCCCATTCCACTAGGAAGCTGCAAACGCGGTCGCAAACCTGGTTGGAATCAAGAGAATACACAAAGCACTTGATTAGAGTCGAAAATTGGATATTCAGGAACCCTGGCTTCGCGTT	...(((..(((((((((((..(((((....)))))......))))).))))))...)))...((.(.((((..(((((....)))))............((((...)))))))).).)).	...(((..(((((.(((((..(((((....)))))......)))))..)))))...)))....(.(.((((............................((((...)))))))).).)..	36	27	31	26
765	884	37	-27.1	-0.39	0.33	17.39	0.0234652	CCCTCCCATTCCACTAGGAAGCTGCAAACGCGGTCGCAAACCTGGTTGGAATCAAGAGAATACACAAAGCACTTGATTAGAGTCGAAAATTGGATATTCAGGAACCCTGGCTTCGCGTTA	..(((..(((((((((((..(((((....)))))......))))).))))))...)))...((.(.((((..(((((....)))))............((((...)))))))).).))..	..(((..(((((.(((((..(((((....)))))......)))))..)))))...)))....(.(.((((............................((((...)))))))).).)...	37	27	30	26
766	885	37	-27.1	-0.52	0.25	21.54	0.0196841	CCTCCCATTCCACTAGGAAGCTGCAAACGCGGTCGCAAACCTGGTTGGAATCAAGAGAATACACAAAGCACTTGATTAGAGTCGAAAATTGGATATTCAGGAACCCTGGCTTCGCGTTAG	.(((..(((((((((((..(((((....)))))......))))).))))))...)))...((.(.((((..(((((....)))))............((((...)))))))).).))...	.(((..(((((.(((((..(((((....)))))......)))))..)))))...)))........((((............................((((...))))))))........	37	28	29	26
767	886	37	-26.7	-0.33	0.25	26.68	0.0109758	CTCCCATTCCACTAGGAAGCTGCAAACGCGGTCGCAAACCTGGTTGGAATCAAGAGAATACACAAAGCACTTGATTAGAGTCGAAAATTGGATATTCAGGAACCCTGGCTTCGCGTTAGC	(((..(((((((((((..(((((....)))))......))))).))))))...)))...((.(.((((..(((((....)))))............((((...)))))))).).))....	(((..(((((.(((((..(((((....)))))......)))))..)))))...)))........................................((((...)))).............	37	28	29	26
768	887	37	-27.2	-0.91	0.17	37.88	0.0222029	TCCCATTCCACTAGGAAGCTGCAAACGCGGTCGCAAACCTGGTTGGAATCAAGAGAATACACAAAGCACTTGATTAGAGTCGAAAATTGGATATTCAGGAACCCTGGCTTCGCGTTAGCA	.....((((....))))..(((.(((((((..((...((.....))(((((((...............)))))))...(((........)))...((((...)))))).))))))).)))	.......((....)).........(((((..................((((((...............))))))....(((........)))...((((...))))....))))).....	38	28	28	26
769	888	37	-29.9	-1.18	0.15	11.56	0.0801387	CCCATTCCACTAGGAAGCTGCAAACGCGGTCGCAAACCTGGTTGGAATCAAGAGAATACACAAAGCACTTGATTAGAGTCGAAAATTGGATATTCAGGAACCCTGGCTTCGCGTTAGCAG	....((((....)))).((((.(((((((..((...((.....))(((((((...............)))))))...(((........)))...((((...)))))).))))))).))))	....((((....)))).((((.(((((((..((...((.....))(((((((...............)))))))...(((........)))...((((...)))))).))))))).))))	38	29	28	25
770	889	37	-33.3	-2.03	0.01	9.87	0.0944754	CCATTCCACTAGGAAGCTGCAAACGCGGTCGCAAACCTGGTTGGAATCAAGAGAATACACAAAGCACTTGATTAGAGTCGAAAATTGGATATTCAGGAACCCTGGCTTCGCGTTAGCAGC	...((((....))))(((((.(((((((..((...((.....))(((((((...............)))))))...(((........)))...((((...)))))).))))))).)))))	...((((....))))(((((.(((((((..((...((.....))(((((((...............)))))))...(((........)))...((((...)))))).))))))).)))))	38	29	28	25
771	890	37	-34.6	-2.36	0.01	9.78	0.0964798	CATTCCACTAGGAAGCTGCAAACGCGGTCGCAAACCTGGTTGGAATCAAGAGAATACACAAAGCACTTGATTAGAGTCGAAAATTGGATATTCAGGAACCCTGGCTTCGCGTTAGCAGCA	..((((....))))(((((.(((((((..((...((.....))(((((((...............)))))))...(((........)))...((((...)))))).))))))).))))).	..((((....))))(((((.(((((((..((...((.....))(((((((...............)))))))...(((........)))...((((...)))))).))))))).))))).	39	29	27	25
772	891	37	-34.6	-2.59	0	9.78	0.0964921	ATTCCACTAGGAAGCTGCAAACGCGGTCGCAAACCTGGTTGGAATCAAGAGAATACACAAAGCACTTGATTAGAGTCGAAAATTGGATATTCAGGAACCCTGGCTTCGCGTTAGCAGCAG	.((((....))))(((((.(((((((..((...((.....))(((((((...............)))))))...(((........)))...((((...)))))).))))))).)))))..	.((((....))))(((((.(((((((..((...((.....))(((((((...............)))))))...(((........)))...((((...)))))).))))))).)))))..	39	30	26	25
773	892	37	-34.6	-2.21	0	9.8	0.0963843	TTCCACTAGGAAGCTGCAAACGCGGTCGCAAACCTGGTTGGAATCAAGAGAATACACAAAGCACTTGATTAGAGTCGAAAATTGGATATTCAGGAACCCTGGCTTCGCGTTAGCAGCAGC	((((....))))(((((.(((((((..((...((.....))(((((((...............)))))))...(((........)))...((((...)))))).))))))).)))))...	((((....))))(((((.(((((((..((...((.....))(((((((...............)))))))...(((........)))...((((...)))))).))))))).)))))...	38	30	27	25
774	893	37	-33.7	-1.99	0.03	10.36	0.10401	TCCACTAGGAAGCTGCAAACGCGGTCGCAAACCTGGTTGGAATCAAGAGAATACACAAAGCACTTGATTAGAGTCGAAAATTGGATATTCAGGAACCCTGGCTTCGCGTTAGCAGCAGCT	(((....))).(((((.(((((((..((...((.....))(((((((...............)))))))...(((........)))...((((...)))))).))))))).)))))....	(((....))).(((((.(((((((..((...((.....))(((((((...............)))))))...(((........)))...((((...)))))).))))))).)))))....	38	30	27	25
775	894	37	-32.1	-1.86	0.01	12.05	0.0429417	CCACTAGGAAGCTGCAAACGCGGTCGCAAACCTGGTTGGAATCAAGAGAATACACAAAGCACTTGATTAGAGTCGAAAATTGGATATTCAGGAACCCTGGCTTCGCGTTAGCAGCAGCTG	((....))..(((((.(((((((..((...((.....))(((((((...............)))))))...(((........)))...((((...)))))).))))))).))))).....	..........(((((.(((((((..((...((.....))(((((((...............)))))))...(((........)))...((((...)))))).))))))).))))).....	38	31	27	24
776	895	37	-32	-1.47	0.05	11.75	0.0466561	CACTAGGAAGCTGCAAACGCGGTCGCAAACCTGGTTGGAATCAAGAGAATACACAAAGCACTTGATTAGAGTCGAAAATTGGATATTCAGGAACCCTGGCTTCGCGTTAGCAGCAGCTGC	.....((..(((((.(((((((..((...((.....))(((((((...............)))))))...(((........)))...((((...)))))).))))))).)))))..))..	.........(((((.(((((((..((...((.....))(((((((...............)))))))...(((........)))...((((...)))))).))))))).)))))......	38	31	27	24
777	896	37	-32	-1.31	0.11	14.88	0.0374765	ACTAGGAAGCTGCAAACGCGGTCGCAAACCTGGTTGGAATCAAGAGAATACACAAAGCACTTGATTAGAGTCGAAAATTGGATATTCAGGAACCCTGGCTTCGCGTTAGCAGCAGCTGCC	....((..(((((.(((((((..((...((.....))(((((((...............)))))))...(((........)))...((((...)))))).))))))).)))))..))...	........(((((.(((((((..((...((.....))(((((((...............)))))))...(((........)))...((((...)))))).))))))).))))).......	38	31	27	24
778	897	37	-32.7	-1.56	0.09	16.85	0.0486884	CTAGGAAGCTGCAAACGCGGTCGCAAACCTGGTTGGAATCAAGAGAATACACAAAGCACTTGATTAGAGTCGAAAATTGGATATTCAGGAACCCTGGCTTCGCGTTAGCAGCAGCTGCCA	...((.((((((.(((((((..((...((.....))(((((((...............)))))))...(((........)))...((((...)))))).)))))))....)))))).)).	...((..(((((.(((((((..((...((.....))(((((((...............)))))))...(((........)))...((((...)))))).)))))))....)))))..)).	38	31	27	24
779	898	37	-32.7	-1.89	0.01	16.73	0.0496194	TAGGAAGCTGCAAACGCGGTCGCAAACCTGGTTGGAATCAAGAGAATACACAAAGCACTTGATTAGAGTCGAAAATTGGATATTCAGGAACCCTGGCTTCGCGTTAGCAGCAGCTGCCAT	..((.((((((.(((((((..((...((.....))(((((((...............)))))))...(((........)))...((((...)))))).)))))))....)))))).))..	..((..(((((.(((((((..((...((.....))(((((((...............)))))))...(((........)))...((((...)))))).)))))))....)))))..))..	38	31	26	25
780	899	37	-32.7	-2.11	0.01	16.32	0.0529655	AGGAAGCTGCAAACGCGGTCGCAAACCTGGTTGGAATCAAGAGAATACACAAAGCACTTGATTAGAGTCGAAAATTGGATATTCAGGAACCCTGGCTTCGCGTTAGCAGCAGCTGCCATC	.((.((((((.(((((((..((...((.....))(((((((...............)))))))...(((........)))...((((...)))))).)))))))....)))))).))...	.((..(((((.(((((((..((...((.....))(((((((...............)))))))...(((........)))...((((...)))))).)))))))....)))))..))...	38	31	27	24
781	900	37	-32.9	-1.67	0.01	16.11	0.0558819	GGAAGCTGCAAACGCGGTCGCAAACCTGGTTGGAATCAAGAGAATACACAAAGCACTTGATTAGAGTCGAAAATTGGATATTCAGGAACCCTGGCTTCGCGTTAGCAGCAGCTGCCATCG	((.((((((.(((((((..((...((.....))(((((((...............)))))))...(((........)))...((((...)))))).)))))))....)))))).))....	((..(((((.(((((((..((...((.....))(((((((...............)))))))...(((........)))...((((...)))))).)))))))....)))))..))....	37	32	27	24
782	901	37	-31.8	-1.29	0.11	11.4	0.0707428	GAAGCTGCAAACGCGGTCGCAAACCTGGTTGGAATCAAGAGAATACACAAAGCACTTGATTAGAGTCGAAAATTGGATATTCAGGAACCCTGGCTTCGCGTTAGCAGCAGCTGCCATCGC	...(((((.(((((((..((...((.....))(((((((...............)))))))...(((........)))...((((...)))))).))))))).)))))............	...(((((.(((((((..((...((.....))(((((((...............)))))))...(((........)))...((((...)))))).))))))).)))))............	37	31	28	24
783	902	37	-32.5	-1.6	0.01	11.7	0.0644984	AAGCTGCAAACGCGGTCGCAAACCTGGTTGGAATCAAGAGAATACACAAAGCACTTGATTAGAGTCGAAAATTGGATATTCAGGAACCCTGGCTTCGCGTTAGCAGCAGCTGCCATCGCT	..(((((.(((((((..((...((.....))(((((((...............)))))))...(((........)))...((((...)))))).))))))).)))))(((.......)))	..(((((.(((((((..((...((.....))(((((((...............)))))))...(((........)))...((((...)))))).))))))).)))))(((.......)))	37	30	28	25
784	903	37	-32.8	-1.12	0.15	11.24	0.0793853	AGCTGCAAACGCGGTCGCAAACCTGGTTGGAATCAAGAGAATACACAAAGCACTTGATTAGAGTCGAAAATTGGATATTCAGGAACCCTGGCTTCGCGTTAGCAGCAGCTGCCATCGCTT	.(((((.(((((((..((...((.....))(((((((...............)))))))...(((........)))...((((...)))))).))))))).)))))(((.......))).	.(((((.(((((((..((...((.....))(((((((...............)))))))...(((........)))...((((...)))))).))))))).)))))(((.......))).	36	30	28	26
785	904	37	-33	-1.21	0.09	11.16	0.0791377	GCTGCAAACGCGGTCGCAAACCTGGTTGGAATCAAGAGAATACACAAAGCACTTGATTAGAGTCGAAAATTGGATATTCAGGAACCCTGGCTTCGCGTTAGCAGCAGCTGCCATCGCTTG	(((((.(((((((..((...((.....))(((((((...............)))))))...(((........)))...((((...)))))).))))))).)))))(((.......)))..	(((((.(((((((..((...((.....))(((((((...............)))))))...(((........)))...((((...)))))).))))))).)))))(((.......)))..	35	31	28	26
786	905	37	-28.4	-0.28	0.35	13.7	0.0337104	CTGCAAACGCGGTCGCAAACCTGGTTGGAATCAAGAGAATACACAAAGCACTTGATTAGAGTCGAAAATTGGATATTCAGGAACCCTGGCTTCGCGTTAGCAGCAGCTGCCATCGCTTGG	((((.(((((((..((...((.....))(((((((...............)))))))...(((........)))...((((...)))))).))))))).))))......(((.....)))	((((.(((((((..((...((.....))(((((((...............)))))))...(((........)))...((((...)))))).))))))).))))..((.......))....	35	31	28	26
787	906	37	-29.4	-0.41	0.31	10.92	0.0918816	TGCAAACGCGGTCGCAAACCTGGTTGGAATCAAGAGAATACACAAAGCACTTGATTAGAGTCGAAAATTGGATATTCAGGAACCCTGGCTTCGCGTTAGCAGCAGCTGCCATCGCTTGGC	(((.(((((((..((...((.....))(((((((...............)))))))...(((........)))...((((...)))))).))))))).)))......((((.....))))	(((.(((((((..((...((.....))(((((((...............)))))))...(((........)))...((((...)))))).))))))).)))......((((.....))))	35	31	28	26
788	907	37	-29.9	-0.57	0.33	12.01	0.107744	GCAAACGCGGTCGCAAACCTGGTTGGAATCAAGAGAATACACAAAGCACTTGATTAGAGTCGAAAATTGGATATTCAGGAACCCTGGCTTCGCGTTAGCAGCAGCTGCCATCGCTTGGCT	((.(((((((..((...((.....))(((((((...............)))))))...(((........)))...((((...)))))).))))))).)).......((((.....)))).	((.(((((((..((...((.....))(((((((...............)))))))...(((........)))...((((...)))))).))))))).)).......((((.....)))).	35	31	28	26
789	908	37	-28.2	-0.18	0.31	12.31	0.101375	CAAACGCGGTCGCAAACCTGGTTGGAATCAAGAGAATACACAAAGCACTTGATTAGAGTCGAAAATTGGATATTCAGGAACCCTGGCTTCGCGTTAGCAGCAGCTGCCATCGCTTGGCTT	..(((((((..((...((.....))(((((((...............)))))))...(((........)))...((((...)))))).)))))))(((....)))((((.....))))..	..(((((((..((...((.....))(((((((...............)))))))...(((........)))...((((...)))))).)))))))(((....)))((((.....))))..	35	30	28	27
790	909	37	-28.2	-0.36	0.29	12.07	0.102511	AAACGCGGTCGCAAACCTGGTTGGAATCAAGAGAATACACAAAGCACTTGATTAGAGTCGAAAATTGGATATTCAGGAACCCTGGCTTCGCGTTAGCAGCAGCTGCCATCGCTTGGCTTT	.(((((((..((...((.....))(((((((...............)))))))...(((........)))...((((...)))))).)))))))(((....)))((((.....))))...	.(((((((..((...((.....))(((((((...............)))))))...(((........)))...((((...)))))).)))))))(((....)))((((.....))))...	35	30	27	28
791	910	37	-27.9	-0.13	0.45	12.63	0.0934006	AACGCGGTCGCAAACCTGGTTGGAATCAAGAGAATACACAAAGCACTTGATTAGAGTCGAAAATTGGATATTCAGGAACCCTGGCTTCGCGTTAGCAGCAGCTGCCATCGCTTGGCTTTT	(((((((..((...((.....))(((((((...............)))))))...(((........)))...((((...)))))).)))))))(((....)))((((.....))))....	(((((((..((...((.....))(((((((...............)))))))...(((........)))...((((...)))))).)))))))(((....)))((((.....))))....	34	30	27	29
792	911	37	-26.4	0.797	0.8	19.52	0.0668699	ACGCGGTCGCAAACCTGGTTGGAATCAAGAGAATACACAAAGCACTTGATTAGAGTCGAAAATTGGATATTCAGGAACCCTGGCTTCGCGTTAGCAGCAGCTGCCATCGCTTGGCTTTTG	((((((..((...((.....))(((((((...............)))))))...(((........)))...((((...)))))).)))))).(((....)))((((.....)))).....	((((((..((...((.....))(((((((...............)))))))...(((........)))...((((...)))))).)))))).(((....)))((((.....)))).....	33	31	27	29
793	912	37	-25.2	1.848	0.96	30.49	0.0256242	CGCGGTCGCAAACCTGGTTGGAATCAAGAGAATACACAAAGCACTTGATTAGAGTCGAAAATTGGATATTCAGGAACCCTGGCTTCGCGTTAGCAGCAGCTGCCATCGCTTGGCTTTTGG	(((((..((...((.....))(((((((...............)))))))...(((........)))...((((...)))))).)))))..(((....)))((((.....))))......	............((.....))(((((((...............)))))))...(((........)))...((((...))))....................((((.....))))......	32	32	27	29
794	913	37	-26.3	1.163	0.88	21.27	0.0335206	GCGGTCGCAAACCTGGTTGGAATCAAGAGAATACACAAAGCACTTGATTAGAGTCGAAAATTGGATATTCAGGAACCCTGGCTTCGCGTTAGCAGCAGCTGCCATCGCTTGGCTTTTGGG	((....))...(((((....(((((((...............)))))))...(((........)))..)))))..(((.((((..(((...((((...))))...)))..))))...)))	((....))...((((.....(((((((...............)))))))...(((........)))...))))..(((.((((..(((...((((...))))...)))..))))...)))	32	33	26	29
795	914	37	-25.9	0.752	0.76	29.71	0.0204942	CGGTCGCAAACCTGGTTGGAATCAAGAGAATACACAAAGCACTTGATTAGAGTCGAAAATTGGATATTCAGGAACCCTGGCTTCGCGTTAGCAGCAGCTGCCATCGCTTGGCTTTTGGGA	..........(((((....(((((((...............)))))))...(((........)))..)))))..(((.((((..(((...((((...))))...)))..))))...))).	...................(((((((...............)))))))...(((........))).........(((.((((..(((...((((...))))...)))..))))...))).	33	32	26	29
796	915	37	-26	0.694	0.66	30.76	0.0171766	GGTCGCAAACCTGGTTGGAATCAAGAGAATACACAAAGCACTTGATTAGAGTCGAAAATTGGATATTCAGGAACCCTGGCTTCGCGTTAGCAGCAGCTGCCATCGCTTGGCTTTTGGGAA	..((.((((((.....))(((((((...............)))))))...(((........)))...((((...))))(((..(((...((((...))))...)))..))).)))).)).	...(.((...........(((((((...............)))))))...(((........)))..............(((..(((...((((...))))...)))..)))...)).)..	34	32	25	29
797	916	37	-26	0.793	0.78	26.32	0.0208268	GTCGCAAACCTGGTTGGAATCAAGAGAATACACAAAGCACTTGATTAGAGTCGAAAATTGGATATTCAGGAACCCTGGCTTCGCGTTAGCAGCAGCTGCCATCGCTTGGCTTTTGGGAAG	.((.((((((.....))(((((((...............)))))))...(((........)))...((((...))))(((..(((...((((...))))...)))..))).)))).))..	.((.(((.((.....))(((((((...............)))))))...(((........)))...((((...))))(((..(((...((((...))))...)))..)))..))).))..	34	32	25	29
798	917	37	-26	0.511	0.62	27.38	0.0193687	TCGCAAACCTGGTTGGAATCAAGAGAATACACAAAGCACTTGATTAGAGTCGAAAATTGGATATTCAGGAACCCTGGCTTCGCGTTAGCAGCAGCTGCCATCGCTTGGCTTTTGGGAAGC	((.((((((.....))(((((((...............)))))))...(((........)))...((((...))))(((..(((...((((...))))...)))..))).)))).))...	((.(((..........(((((((...............)))))))...(((........)))...((((...))))(((..(((...((((...))))...)))..)))..))).))...	34	31	26	29
799	918	37	-25.9	0.793	0.78	27.82	0.0184296	CGCAAACCTGGTTGGAATCAAGAGAATACACAAAGCACTTGATTAGAGTCGAAAATTGGATATTCAGGAACCCTGGCTTCGCGTTAGCAGCAGCTGCCATCGCTTGGCTTTTGGGAAGCT	......(((((....(((((((...............)))))))...(((........)))..)))))..(((.((((..(((...((((...))))...)))..))))...))).....	......((((.....(((((((...............)))))))...(((........)))...))))..(((.((((..(((...((((...))))...)))..))))...))).....	34	31	26	29
800	919	37	-25.9	0.526	0.62	28.73	0.0193529	GCAAACCTGGTTGGAATCAAGAGAATACACAAAGCACTTGATTAGAGTCGAAAATTGGATATTCAGGAACCCTGGCTTCGCGTTAGCAGCAGCTGCCATCGCTTGGCTTTTGGGAAGCTC	.....(((((....(((((((...............)))))))...(((........)))..)))))..(((.((((..(((...((((...))))...)))..))))...)))......	.....((((.....(((((((...............)))))))...(((........)))...))))..(((.((((..(((...((((...))))...)))..))))...)))......	34	31	26	29
801	920	37	-25.9	0.351	0.58	30.24	0.0224623	CAAACCTGGTTGGAATCAAGAGAATACACAAAGCACTTGATTAGAGTCGAAAATTGGATATTCAGGAACCCTGGCTTCGCGTTAGCAGCAGCTGCCATCGCTTGGCTTTTGGGAAGCTCA	....(((((....(((((((...............)))))))...(((........)))..)))))..(((.((((..(((...((((...))))...)))..))))...))).......	....((((.....(((((((...............)))))))...(((........)))...))))............(((.................)))...................	35	30	26	29
802	921	37	-25.9	0.011	0.5	30.54	0.0188368	AAACCTGGTTGGAATCAAGAGAATACACAAAGCACTTGATTAGAGTCGAAAATTGGATATTCAGGAACCCTGGCTTCGCGTTAGCAGCAGCTGCCATCGCTTGGCTTTTGGGAAGCTCAA	...(((((....(((((((...............)))))))...(((........)))..)))))..(((.((((..(((...((((...))))...)))..))))...)))........	...((((.....(((((((...............)))))))...(((........)))...)))).......(((((.(..............................).)))))....	36	30	25	29
803	922	37	-26.3	0.334	0.58	29.56	0.0191096	AACCTGGTTGGAATCAAGAGAATACACAAAGCACTTGATTAGAGTCGAAAATTGGATATTCAGGAACCCTGGCTTCGCGTTAGCAGCAGCTGCCATCGCTTGGCTTTTGGGAAGCTCAAC	......((((((((((((...............)))))))...(((........)))...((((...))))(((((.((..(((...(((.......)))..)))..)).))))))))))	...........(((((((...............)))))))...(((........)))...((((...))))(((((.((...((..................))...)).))))).....	35	30	26	29
804	923	37	-27.9	0.101	0.49	18.55	0.0390878	ACCTGGTTGGAATCAAGAGAATACACAAAGCACTTGATTAGAGTCGAAAATTGGATATTCAGGAACCCTGGCTTCGCGTTAGCAGCAGCTGCCATCGCTTGGCTTTTGGGAAGCTCAACG	.....((((((((((((...............)))))))...(((........)))...((((...))))(((((.((..(((...(((.......)))..)))..)).)))))))))).	.....((((((((((((...............)))))))...(((........)))...((((...))))(((((.((..(((....((.......))...)))..)).)))))))))).	34	31	26	29
805	924	37	-27.9	-0.03	0.45	18.52	0.0285494	CCTGGTTGGAATCAAGAGAATACACAAAGCACTTGATTAGAGTCGAAAATTGGATATTCAGGAACCCTGGCTTCGCGTTAGCAGCAGCTGCCATCGCTTGGCTTTTGGGAAGCTCAACGA	....((((((((((((...............)))))))...(((........)))...((((...))))(((((.((..(((...(((.......)))..)))..)).))))))))))..	....((((((((((((...............)))))))...(((........)))...((((...))))(((((.((..(((....((.......))...)))..)).))))))))))..	34	31	26	29
806	925	37	-29.8	-0.34	0.33	15.77	0.0380161	CTGGTTGGAATCAAGAGAATACACAAAGCACTTGATTAGAGTCGAAAATTGGATATTCAGGAACCCTGGCTTCGCGTTAGCAGCAGCTGCCATCGCTTGGCTTTTGGGAAGCTCAACGAG	((.((((((((((((...............)))))))...(((........)))...((((...))))(((((.((..(((...(((.......)))..)))..)).)))))))))).))	((.((((((((((((...............)))))))...(((........)))...((((...))))(((((.((..(((....((.......))...)))..)).)))))))))).))	34	32	25	29
807	926	37	-28	0.382	0.58	16.85	0.0225865	TGGTTGGAATCAAGAGAATACACAAAGCACTTGATTAGAGTCGAAAATTGGATATTCAGGAACCCTGGCTTCGCGTTAGCAGCAGCTGCCATCGCTTGGCTTTTGGGAAGCTCAACGAGC	(.((((((((((((...............)))))))...(((........)))...((((...))))(((((.((..(((...(((.......)))..)))..)).)))))))))).)..	(.((((((((((((...............)))))))...(((........)))...((((...))))(((((.((..(((....((.......))...)))..)).)))))))))).)..	34	32	25	29
808	927	37	-28	0.147	0.43	27.14	0.0197773	GGTTGGAATCAAGAGAATACACAAAGCACTTGATTAGAGTCGAAAATTGGATATTCAGGAACCCTGGCTTCGCGTTAGCAGCAGCTGCCATCGCTTGGCTTTTGGGAAGCTCAACGAGCC	((((.((((((((...............)))))))...(((........)))...((((...))))(((((.((..(((...(((.......)))..)))..)).)))))....).))))	((((..(((((((...............)))))))...(((........)))...((((...))))(((((.((..(((..................)))..)).)))))......))))	34	32	26	28
809	928	37	-28	-0.22	0.35	34.17	0.0216079	GTTGGAATCAAGAGAATACACAAAGCACTTGATTAGAGTCGAAAATTGGATATTCAGGAACCCTGGCTTCGCGTTAGCAGCAGCTGCCATCGCTTGGCTTTTGGGAAGCTCAACGAGCCA	((((((((((((...............)))))))...(((........)))...((((...))))(((((.((..(((...(((.......)))..)))..)).))))))))))......	((((.(((((((...............)))))))...(((........)))...((((...)))).............................................))))......	35	31	26	28
810	929	37	-28	-0.21	0.39	24.39	0.0122512	TTGGAATCAAGAGAATACACAAAGCACTTGATTAGAGTCGAAAATTGGATATTCAGGAACCCTGGCTTCGCGTTAGCAGCAGCTGCCATCGCTTGGCTTTTGGGAAGCTCAACGAGCCAA	....(((((((...............)))))))...(((........)))..(((((...)))))....(((...((((...))))...))).(((((((((((...))))).)))))).	....(((((((...............)))))))...(((........)))...((((...)))).....(((...((((...))))...))).(((((((((((...))))).)))))).	36	30	26	28
811	930	37	-28.9	-0.82	0.19	18.13	0.0269039	TGGAATCAAGAGAATACACAAAGCACTTGATTAGAGTCGAAAATTGGATATTCAGGAACCCTGGCTTCGCGTTAGCAGCAGCTGCCATCGCTTGGCTTTTGGGAAGCTCAACGAGCCAAA	...(((((((...............)))))))...(((........)))..(((((...)))))....(((...((((...))))...)))((((((((((((...))))).))))))).	...(((((((...............)))))))...(((........)))...((((...)))).....(((...((((...))))...)))((((((((((((...))))).))))))).	37	30	26	27
812	931	37	-28.9	-1.37	0.07	17.41	0.0287244	GGAATCAAGAGAATACACAAAGCACTTGATTAGAGTCGAAAATTGGATATTCAGGAACCCTGGCTTCGCGTTAGCAGCAGCTGCCATCGCTTGGCTTTTGGGAAGCTCAACGAGCCAAAA	..(((((((...............)))))))...(((........)))..(((((...)))))....(((...((((...))))...)))((((((((((((...))))).)))))))..	..(((((((...............)))))))...(((........)))...((((...)))).....(((...((((...))))...)))((((((((((((...))))).)))))))..	38	30	26	26
813	932	37	-28.9	-1.01	0.15	12.77	0.033276	GAATCAAGAGAATACACAAAGCACTTGATTAGAGTCGAAAATTGGATATTCAGGAACCCTGGCTTCGCGTTAGCAGCAGCTGCCATCGCTTGGCTTTTGGGAAGCTCAACGAGCCAAAAA	.(((((((...............)))))))...(((........)))..(((((...)))))....(((...((((...))))...)))((((((((((((...))))).)))))))...	.(((((((...............)))))))...(((........)))...((((...)))).....(((...((((...))))...)))((((((((((((...))))).)))))))...	39	29	26	26
814	933	37	-28.5	-0.99	0.17	13.91	0.0301255	AATCAAGAGAATACACAAAGCACTTGATTAGAGTCGAAAATTGGATATTCAGGAACCCTGGCTTCGCGTTAGCAGCAGCTGCCATCGCTTGGCTTTTGGGAAGCTCAACGAGCCAAAAAG	(((((((...............)))))))...(((........)))..(((((...)))))....(((...((((...))))...)))((((((((((((...))))).)))))))....	(((((((...............)))))))...(((........)))...((((...)))).....(((...((((...))))...)))((((((((((((...))))).)))))))....	39	29	26	26
815	934	37	-27	-0.67	0.19	25.15	0.0138488	ATCAAGAGAATACACAAAGCACTTGATTAGAGTCGAAAATTGGATATTCAGGAACCCTGGCTTCGCGTTAGCAGCAGCTGCCATCGCTTGGCTTTTGGGAAGCTCAACGAGCCAAAAAGT	((((((...............))))))....(((........)))..(((((...)))))....(((...((((...))))...)))((((((((((((...))))).))))))).....	.(((((...............)))))......................((((...)))).....(((...((((...))))...)))((((((((((((...))))).))))))).....	38	29	26	27
816	935	37	-27	-0.63	0.23	26.46	0.0140741	TCAAGAGAATACACAAAGCACTTGATTAGAGTCGAAAATTGGATATTCAGGAACCCTGGCTTCGCGTTAGCAGCAGCTGCCATCGCTTGGCTTTTGGGAAGCTCAACGAGCCAAAAAGTC	......(((((..(((.....(((((....)))))...)))..)))))(((...)))(((((.(((...((((...))))...)))((((((((((((...))))).))))))).)))))	......(((((..((........................))..)))))(((...)))......(((...((((...))))...)))((((((((((((...))))).)))))))......	37	29	27	27
817	936	37	-28.5	-0.79	0.25	15.6	0.0305944	CAAGAGAATACACAAAGCACTTGATTAGAGTCGAAAATTGGATATTCAGGAACCCTGGCTTCGCGTTAGCAGCAGCTGCCATCGCTTGGCTTTTGGGAAGCTCAACGAGCCAAAAAGTCA	.....(((((..(((.....(((((....)))))...)))..)))))(((...)))(((((.(((...((((...))))...)))((((((((((((...))))).))))))).))))).	.....(((((..(((......(((......)))....)))..))))).........(((((.(((...((((...))))...)))((((((((((((...))))).))))))).))))).	38	29	27	26
818	937	37	-29.1	-1.06	0.11	14.16	0.0488081	AAGAGAATACACAAAGCACTTGATTAGAGTCGAAAATTGGATATTCAGGAACCCTGGCTTCGCGTTAGCAGCAGCTGCCATCGCTTGGCTTTTGGGAAGCTCAACGAGCCAAAAAGTCAT	....(((((..(((.....(((((....)))))...)))..)))))........((((((.(((...((((...))))...)))((((((((((((...))))).))))))).)))))).	....(((((..(((......(((......)))....)))..)))))........((((((.(((...((((...))))...)))((((((((((((...))))).))))))).)))))).	38	29	26	27
819	938	37	-29.1	-1.33	0.09	14.18	0.0487126	AGAGAATACACAAAGCACTTGATTAGAGTCGAAAATTGGATATTCAGGAACCCTGGCTTCGCGTTAGCAGCAGCTGCCATCGCTTGGCTTTTGGGAAGCTCAACGAGCCAAAAAGTCATA	...(((((..(((.....(((((....)))))...)))..)))))........((((((.(((...((((...))))...)))((((((((((((...))))).))))))).))))))..	...(((((..(((......(((......)))....)))..)))))........((((((.(((...((((...))))...)))((((((((((((...))))).))))))).))))))..	38	29	26	27
820	939	37	-29.1	-0.83	0.17	14.36	0.0483258	GAGAATACACAAAGCACTTGATTAGAGTCGAAAATTGGATATTCAGGAACCCTGGCTTCGCGTTAGCAGCAGCTGCCATCGCTTGGCTTTTGGGAAGCTCAACGAGCCAAAAAGTCATAT	..(((((..(((.....(((((....)))))...)))..)))))........((((((.(((...((((...))))...)))((((((((((((...))))).))))))).))))))...	..(((((..(((......(((......)))....)))..)))))........((((((.(((...((((...))))...)))((((((((((((...))))).))))))).))))))...	37	29	26	28
821	940	37	-29.1	-1.19	0.15	14	0.0491893	AGAATACACAAAGCACTTGATTAGAGTCGAAAATTGGATATTCAGGAACCCTGGCTTCGCGTTAGCAGCAGCTGCCATCGCTTGGCTTTTGGGAAGCTCAACGAGCCAAAAAGTCATATA	.(((((..(((.....(((((....)))))...)))..)))))........((((((.(((...((((...))))...)))((((((((((((...))))).))))))).))))))....	.(((((..(((......(((......)))....)))..)))))........((((((.(((...((((...))))...)))((((((((((((...))))).))))))).))))))....	38	28	26	28
822	941	37	-29.3	-1.09	0.17	13.33	0.0502498	GAATACACAAAGCACTTGATTAGAGTCGAAAATTGGATATTCAGGAACCCTGGCTTCGCGTTAGCAGCAGCTGCCATCGCTTGGCTTTTGGGAAGCTCAACGAGCCAAAAAGTCATATAC	(((((..(((.....(((((....)))))...)))..)))))........((((((.(((...((((...))))...)))((((((((((((...))))).))))))).)))))).....	(((((..(((......(((......)))....)))..)))))........((((((.(((...((((...))))...)))((((((((((((...))))).))))))).)))))).....	37	28	27	28
823	942	37	-27.1	-0.5	0.29	19.84	0.0193772	AATACACAAAGCACTTGATTAGAGTCGAAAATTGGATATTCAGGAACCCTGGCTTCGCGTTAGCAGCAGCTGCCATCGCTTGGCTTTTGGGAAGCTCAACGAGCCAAAAAGTCATATACT	...............(((((...(((........)))..(((((...)))))....(((...((((...))))...)))((((((((((((...))))).)))))))..)))))......	.......................(((........)))...((((...)))).....(((...((((...))))...)))((((((((((((...))))).))))))).............	37	27	27	29
824	943	37	-27.2	-0.64	0.23	17.76	0.0144672	ATACACAAAGCACTTGATTAGAGTCGAAAATTGGATATTCAGGAACCCTGGCTTCGCGTTAGCAGCAGCTGCCATCGCTTGGCTTTTGGGAAGCTCAACGAGCCAAAAAGTCATATACTT	.......(((....(((((...(((........)))..(((((...)))))....(((...((((...))))...)))((((((((((((...))))).)))))))..)))))....)))	..............((((....(((........)))...((((...)))).....(((...((((...))))...)))((((((((((((...))))).)))))))...)))).......	36	27	27	30
825	944	37	-28	-0.56	0.29	15.34	0.0249098	TACACAAAGCACTTGATTAGAGTCGAAAATTGGATATTCAGGAACCCTGGCTTCGCGTTAGCAGCAGCTGCCATCGCTTGGCTTTTGGGAAGCTCAACGAGCCAAAAAGTCATATACTTG	......(((....(((((...(((........)))..(((((...)))))....(((...((((...))))...)))((((((((((((...))))).)))))))..)))))....))).	......(((....(((((...(((........)))...((((...)))).....(((...((((...))))...)))((((((((((((...))))).)))))))..)))))....))).	35	28	27	30
826	945	37	-28	-0.32	0.41	16.24	0.0132472	ACACAAAGCACTTGATTAGAGTCGAAAATTGGATATTCAGGAACCCTGGCTTCGCGTTAGCAGCAGCTGCCATCGCTTGGCTTTTGGGAAGCTCAACGAGCCAAAAAGTCATATACTTGG	.....(((....(((((...(((........)))..(((((...)))))....(((...((((...))))...)))((((((((((((...))))).)))))))..)))))....)))..	......((....(((((...(((........)))...((((...)))).....(((...((((...))))...)))((((((((((((...))))).)))))))..)))))....))...	35	29	27	29
827	946	37	-28.2	-0.16	0.43	15.18	0.0103309	CACAAAGCACTTGATTAGAGTCGAAAATTGGATATTCAGGAACCCTGGCTTCGCGTTAGCAGCAGCTGCCATCGCTTGGCTTTTGGGAAGCTCAACGAGCCAAAAAGTCATATACTTGGT	.((.(((....(((((...(((........)))..(((((...)))))....(((...((((...))))...)))((((((((((((...))))).)))))))..)))))....))).))	.....((....(((((...(((........)))...((((...)))).....(((...((((...))))...)))((((((((((((...))))).)))))))..)))))....))....	34	29	27	30
828	947	37	-28	-0.11	0.47	16.26	0.00828299	ACAAAGCACTTGATTAGAGTCGAAAATTGGATATTCAGGAACCCTGGCTTCGCGTTAGCAGCAGCTGCCATCGCTTGGCTTTTGGGAAGCTCAACGAGCCAAAAAGTCATATACTTGGTC	...(((....(((((...(((........)))..(((((...)))))....(((...((((...))))...)))((((((((((((...))))).)))))))..)))))....)))....	....((....(((((...(((........)))...((((...)))).....(((...((((...))))...)))((((((((((((...))))).)))))))..)))))....)).....	34	29	27	30
829	948	37	-28	-0.35	0.39	21.29	0.00785713	CAAAGCACTTGATTAGAGTCGAAAATTGGATATTCAGGAACCCTGGCTTCGCGTTAGCAGCAGCTGCCATCGCTTGGCTTTTGGGAAGCTCAACGAGCCAAAAAGTCATATACTTGGTCA	..(((....(((((...(((........)))..(((((...)))))....(((...((((...))))...)))((((((((((((...))))).)))))))..)))))....))).....	.................(((........)))...((((...)))).....(((...((((...))))...)))((((((((((((...))))).)))))))...................	34	29	27	30
830	949	37	-28.6	-0.5	0.27	19.7	0.0164727	AAAGCACTTGATTAGAGTCGAAAATTGGATATTCAGGAACCCTGGCTTCGCGTTAGCAGCAGCTGCCATCGCTTGGCTTTTGGGAAGCTCAACGAGCCAAAAAGTCATATACTTGGTCAT	........(((((((.(((........)))..(((((...)))))....(((...((((...))))...)))((((((((((((...))))).)))))))............))))))).	........(((((...(((........)))..(((((...)))))....(((...((((...))))...)))((((((((((((...))))).)))))))..............))))).	34	29	26	31
831	950	37	-28.6	-0.15	0.39	18.79	0.0138641	AAGCACTTGATTAGAGTCGAAAATTGGATATTCAGGAACCCTGGCTTCGCGTTAGCAGCAGCTGCCATCGCTTGGCTTTTGGGAAGCTCAACGAGCCAAAAAGTCATATACTTGGTCATG	.......(((((((.(((........)))..(((((...)))))....(((...((((...))))...)))((((((((((((...))))).)))))))............)))))))..	.......((((((..(((........)))..(((((...)))))....(((...((((...))))...)))((((((((((((...))))).))))))).............))))))..	33	30	26	31
832	951	37	-28.6	-0.41	0.27	17.71	0.00985628	AGCACTTGATTAGAGTCGAAAATTGGATATTCAGGAACCCTGGCTTCGCGTTAGCAGCAGCTGCCATCGCTTGGCTTTTGGGAAGCTCAACGAGCCAAAAAGTCATATACTTGGTCATGA	......(((((((.(((........)))..(((((...)))))....(((...((((...))))...)))((((((((((((...))))).)))))))............)))))))...	......((((((..(((........)))..(((((...)))))....(((...((((...))))...)))((((((((((((...))))).))))))).............))))))...	33	30	26	31
833	952	37	-28.6	-0.05	0.43	18.22	0.00961977	GCACTTGATTAGAGTCGAAAATTGGATATTCAGGAACCCTGGCTTCGCGTTAGCAGCAGCTGCCATCGCTTGGCTTTTGGGAAGCTCAACGAGCCAAAAAGTCATATACTTGGTCATGAT	.....(((((((.(((........)))..(((((...)))))....(((...((((...))))...)))((((((((((((...))))).)))))))............)))))))....	.....((((((..(((........)))..(((((...)))))....(((...((((...))))...)))((((((((((((...))))).))))))).............))))))....	32	30	26	32
834	953	37	-28.6	-0.53	0.29	18.54	0.00984871	CACTTGATTAGAGTCGAAAATTGGATATTCAGGAACCCTGGCTTCGCGTTAGCAGCAGCTGCCATCGCTTGGCTTTTGGGAAGCTCAACGAGCCAAAAAGTCATATACTTGGTCATGATA	....(((((((.(((........)))..(((((...)))))....(((...((((...))))...)))((((((((((((...))))).)))))))............))))))).....	....((((((..(((........)))..(((((...)))))....(((...((((...))))...)))((((((((((((...))))).))))))).............)))))).....	33	29	26	32
835	954	37	-28.6	-0.33	0.37	18.35	0.0110662	ACTTGATTAGAGTCGAAAATTGGATATTCAGGAACCCTGGCTTCGCGTTAGCAGCAGCTGCCATCGCTTGGCTTTTGGGAAGCTCAACGAGCCAAAAAGTCATATACTTGGTCATGATAC	...(((((((.(((........)))..(((((...)))))....(((...((((...))))...)))((((((((((((...))))).)))))))............)))))))......	...((((((..(((........)))..(((((...)))))....(((...((((...))))...)))((((((((((((...))))).))))))).............))))))......	33	29	26	32
836	955	37	-28.6	-0.29	0.37	18.46	0.0111133	CTTGATTAGAGTCGAAAATTGGATATTCAGGAACCCTGGCTTCGCGTTAGCAGCAGCTGCCATCGCTTGGCTTTTGGGAAGCTCAACGAGCCAAAAAGTCATATACTTGGTCATGATACT	..(((((((.(((........)))..(((((...)))))....(((...((((...))))...)))((((((((((((...))))).)))))))............))))))).......	..((((((..(((........)))..(((((...)))))....(((...((((...))))...)))((((((((((((...))))).))))))).............)))))).......	32	29	26	33
837	956	37	-28.6	-0.31	0.37	18.32	0.0191812	TTGATTAGAGTCGAAAATTGGATATTCAGGAACCCTGGCTTCGCGTTAGCAGCAGCTGCCATCGCTTGGCTTTTGGGAAGCTCAACGAGCCAAAAAGTCATATACTTGGTCATGATACTG	.(((((((.(((........)))..(((((...)))))....(((...((((...))))...)))((((((((((((...))))).)))))))............)))))))........	.((((((..(((........)))..(((((...)))))....(((...((((...))))...)))((((((((((((...))))).))))))).............))))))........	32	30	25	33
838	957	37	-28.4	0.187	0.5	18.01	0.017863	TGATTAGAGTCGAAAATTGGATATTCAGGAACCCTGGCTTCGCGTTAGCAGCAGCTGCCATCGCTTGGCTTTTGGGAAGCTCAACGAGCCAAAAAGTCATATACTTGGTCATGATACTGC	(((((((.(((........)))..(((((...)))))....(((...((((...))))...)))((((((((((((...))))).)))))))............))))))).........	((((((..(((........)))..(((((...)))))....(((...((((...))))...)))((((((((((((...))))).))))))).............)))))).........	32	30	26	32
839	958	37	-27.9	-0.05	0.47	22.58	0.0160875	GATTAGAGTCGAAAATTGGATATTCAGGAACCCTGGCTTCGCGTTAGCAGCAGCTGCCATCGCTTGGCTTTTGGGAAGCTCAACGAGCCAAAAAGTCATATACTTGGTCATGATACTGCT	((((((.(((........)))..(((((...)))))....(((...((((...))))...)))((((((((((((...))))).)))))))............))))))...........	(((.....((........))...(((((...)))))....(((...((((...))))...)))((((((((((((...))))).)))))))...............)))...........	32	30	26	32
840	959	37	-26.4	0.48	0.62	33.68	0.00229235	ATTAGAGTCGAAAATTGGATATTCAGGAACCCTGGCTTCGCGTTAGCAGCAGCTGCCATCGCTTGGCTTTTGGGAAGCTCAACGAGCCAAAAAGTCATATACTTGGTCATGATACTGCTG	((((((.((((..((..(((..(((((...)))))....(((...((((...))))...)))((((((((((((...))))).)))))))...)))..))..)))))).)))).......	......................(((((...)))))....(((...((((...))))...)))((((((((((((...))))).)))))))..............................	32	30	26	32
841	960	37	-27.2	0.159	0.54	38.38	0.00267278	TTAGAGTCGAAAATTGGATATTCAGGAACCCTGGCTTCGCGTTAGCAGCAGCTGCCATCGCTTGGCTTTTGGGAAGCTCAACGAGCCAAAAAGTCATATACTTGGTCATGATACTGCTGA	((((.(((........)))..(((((...)))))....(((...((((...))))...)))((((((((((((...))))).)))))))...(((((..........)))))....))))	.....................(((((...)))))....(((...((((...))))...)))((((((((((((...))))).)))))))...............................	32	30	26	32
842	961	37	-27.4	0.214	0.52	38.19	0.00178025	TAGAGTCGAAAATTGGATATTCAGGAACCCTGGCTTCGCGTTAGCAGCAGCTGCCATCGCTTGGCTTTTGGGAAGCTCAACGAGCCAAAAAGTCATATACTTGGTCATGATACTGCTGAT	....(((........)))..(((((...)))))......((((((((...((((((.....((((((((.....((((...))))..))))))))......))).)).)...))))))))	.....((........))....((((...)))).......((((((((......(((.....((((..........................))))......)))........))))))))	32	30	26	32
843	962	37	-27.7	0.209	0.5	35.82	0.00215951	AGAGTCGAAAATTGGATATTCAGGAACCCTGGCTTCGCGTTAGCAGCAGCTGCCATCGCTTGGCTTTTGGGAAGCTCAACGAGCCAAAAAGTCATATACTTGGTCATGATACTGCTGATT	...(((........)))..(((((...)))))......((((((((...((((((.....((((((((.....((((...))))..))))))))......))).)).)...)))))))).	....((........))....((((...)))).......((((((((......(((.....((((..........................))))......)))........)))))))).	32	30	26	32
844	963	37	-27.7	0.636	0.66	37.69	0.0019752	GAGTCGAAAATTGGATATTCAGGAACCCTGGCTTCGCGTTAGCAGCAGCTGCCATCGCTTGGCTTTTGGGAAGCTCAACGAGCCAAAAAGTCATATACTTGGTCATGATACTGCTGATTG	..(((........)))..(((((...)))))......((((((((...((((((.....((((((((.....((((...))))..))))))))......))).)).)...))))))))..	...((........))...(((((...)))))......((((((((......(((.....((((..........................))))......)))........))))))))..	31	31	26	32
845	964	37	-28.9	-0.01	0.49	27.7	0.00206619	AGTCGAAAATTGGATATTCAGGAACCCTGGCTTCGCGTTAGCAGCAGCTGCCATCGCTTGGCTTTTGGGAAGCTCAACGAGCCAAAAAGTCATATACTTGGTCATGATACTGCTGATTGC	.(((........)))..(((((...)))))....((((((((((...((((((.....((((((((.....((((...))))..))))))))......))).)).)...))))))).)))	.(((........)))..(((((...)))))....((.(((((((......(((.....(((((........................)))))......)))........)))))))..))	31	30	27	32
846	965	37	-29.4	-0.12	0.35	26.93	0.00192535	GTCGAAAATTGGATATTCAGGAACCCTGGCTTCGCGTTAGCAGCAGCTGCCATCGCTTGGCTTTTGGGAAGCTCAACGAGCCAAAAAGTCATATACTTGGTCATGATACTGCTGATTGCC	(((........)))..(((((...)))))....((((((((((...((((((.....((((((((.....((((...))))..))))))))......))).)).)...))))))).))).	(((........)))..(((((...)))))....((.(((((((......(((.....(((((........................)))))......)))........)))))))..)).	30	30	28	32
847	966	37	-28.9	0.005	0.37	28.98	0.00191534	TCGAAAATTGGATATTCAGGAACCCTGGCTTCGCGTTAGCAGCAGCTGCCATCGCTTGGCTTTTGGGAAGCTCAACGAGCCAAAAAGTCATATACTTGGTCATGATACTGCTGATTGCCC	.........(((...(((((...))))).)))((((((((((...((((((.....((((((((.....((((...))))..))))))))......))).)).)...))))))).)))..	...............(((((...)))))....((.(((((((......(((.....(((((........................)))))......)))........)))))))..))..	30	29	29	32
848	967	37	-28.9	-0.04	0.41	29.93	0.002144	CGAAAATTGGATATTCAGGAACCCTGGCTTCGCGTTAGCAGCAGCTGCCATCGCTTGGCTTTTGGGAAGCTCAACGAGCCAAAAAGTCATATACTTGGTCATGATACTGCTGATTGCCCC	........(((...(((((...))))).)))((((((((((...((((((.....((((((((.....((((...))))..))))))))......))).)).)...))))))).)))...	..............(((((...)))))....((.(((((((......(((.....(((((........................)))))......)))........)))))))..))...	30	29	30	31
849	968	37	-28.9	0.203	0.5	30.53	0.0017774	GAAAATTGGATATTCAGGAACCCTGGCTTCGCGTTAGCAGCAGCTGCCATCGCTTGGCTTTTGGGAAGCTCAACGAGCCAAAAAGTCATATACTTGGTCATGATACTGCTGATTGCCCCG	.......(((...(((((...))))).)))((((((((((...((((((.....((((((((.....((((...))))..))))))))......))).)).)...))))))).)))....	.............(((((...)))))....((.(((((((......(((.....(((((........................)))))......)))........)))))))..))....	30	30	29	31
850	969	37	-28.9	0.522	0.66	31.59	0.00123099	AAAATTGGATATTCAGGAACCCTGGCTTCGCGTTAGCAGCAGCTGCCATCGCTTGGCTTTTGGGAAGCTCAACGAGCCAAAAAGTCATATACTTGGTCATGATACTGCTGATTGCCCCGG	......(((...(((((...))))).)))((((((((((...((((((.....((((((((.....((((...))))..))))))))......))).)).)...))))))).))).....	............(((((...)))))....((.(((((((......(((.....(((((........................)))))......)))........)))))))..)).....	30	30	29	31
851	970	37	-29.4	0.279	0.6	31.87	0.00180128	AAATTGGATATTCAGGAACCCTGGCTTCGCGTTAGCAGCAGCTGCCATCGCTTGGCTTTTGGGAAGCTCAACGAGCCAAAAAGTCATATACTTGGTCATGATACTGCTGATTGCCCCGGC	............((((...))))(((..((((((((((...((((((.....((((((((.....((((...))))..))))))))......))).)).)...))))))).)))...)))	............((((...)))).....((.(((((((......(((.....(((((........................)))))......)))........)))))))..))......	29	30	30	31
852	971	37	-30.8	-0.3	0.33	30.35	0.00525387	AATTGGATATTCAGGAACCCTGGCTTCGCGTTAGCAGCAGCTGCCATCGCTTGGCTTTTGGGAAGCTCAACGAGCCAAAAAGTCATATACTTGGTCATGATACTGCTGATTGCCCCGGCA	...........((((...))))(((..((((((((((...((((((.....((((((((.....((((...))))..))))))))......))).)).)...))))))).)))...))).	...........((((...))))(((..((.(((((((......(((.....(((((........................)))))......)))........)))))))..))...))).	29	30	30	31
853	972	37	-30.8	-0.35	0.35	32.6	0.00496947	ATTGGATATTCAGGAACCCTGGCTTCGCGTTAGCAGCAGCTGCCATCGCTTGGCTTTTGGGAAGCTCAACGAGCCAAAAAGTCATATACTTGGTCATGATACTGCTGATTGCCCCGGCAT	..........((((...))))(((..((((((((((...((((((.....((((((((.....((((...))))..))))))))......))).)).)...))))))).)))...)))..	..........((((...))))(((..((.(((((((......(((.....(((((........................)))))......)))........)))))))..))...)))..	28	30	30	32
854	973	37	-30.8	-0.06	0.39	32.26	0.0050245	TTGGATATTCAGGAACCCTGGCTTCGCGTTAGCAGCAGCTGCCATCGCTTGGCTTTTGGGAAGCTCAACGAGCCAAAAAGTCATATACTTGGTCATGATACTGCTGATTGCCCCGGCATA	.........((((...))))(((..((((((((((...((((((.....((((((((.....((((...))))..))))))))......))).)).)...))))))).)))...)))...	.........((((...))))(((..((.(((((((......(((.....(((((........................)))))......)))........)))))))..))...)))...	28	30	30	32
855	974	37	-30.8	-0.14	0.37	31.78	0.00530229	TGGATATTCAGGAACCCTGGCTTCGCGTTAGCAGCAGCTGCCATCGCTTGGCTTTTGGGAAGCTCAACGAGCCAAAAAGTCATATACTTGGTCATGATACTGCTGATTGCCCCGGCATAC	........((((...))))(((..((((((((((...((((((.....((((((((.....((((...))))..))))))))......))).)).)...))))))).)))...)))....	........((((...))))(((..((.(((((((......(((.....(((((........................)))))......)))........)))))))..))...)))....	28	30	31	31
856	975	37	-30.8	-0.3	0.29	32.46	0.00517092	GGATATTCAGGAACCCTGGCTTCGCGTTAGCAGCAGCTGCCATCGCTTGGCTTTTGGGAAGCTCAACGAGCCAAAAAGTCATATACTTGGTCATGATACTGCTGATTGCCCCGGCATACA	.......((((...))))(((..((((((((((...((((((.....((((((((.....((((...))))..))))))))......))).)).)...))))))).)))...))).....	.......((((...))))(((..((.(((((((......(((.....(((((........................)))))......)))........)))))))..))...))).....	29	30	31	30
857	976	37	-30.8	-0.26	0.39	31.71	0.00578372	GATATTCAGGAACCCTGGCTTCGCGTTAGCAGCAGCTGCCATCGCTTGGCTTTTGGGAAGCTCAACGAGCCAAAAAGTCATATACTTGGTCATGATACTGCTGATTGCCCCGGCATACAG	......((((...))))(((..((((((((((...((((((.....((((((((.....((((...))))..))))))))......))).)).)...))))))).)))...)))......	......((((...))))(((..((.(((((((......(((.....(((((........................)))))......)))........)))))))..))...)))......	29	30	31	30
858	977	37	-31.9	-0.53	0.19	39.96	0.0183417	ATATTCAGGAACCCTGGCTTCGCGTTAGCAGCAGCTGCCATCGCTTGGCTTTTGGGAAGCTCAACGAGCCAAAAAGTCATATACTTGGTCATGATACTGCTGATTGCCCCGGCATACAGC	....(((((.....((((((.(((...((((...))))...)))((((((((((((...))))).))))))).))))))....)))))..........((((..(((....)))..))))	.....((((...)))).....(((...((((...))))...)))((((((((((((...))))).)))))))...........................(((...((....))...))).	29	29	32	30
859	978	37	-33.6	-1.63	0.03	21.16	0.0216232	TATTCAGGAACCCTGGCTTCGCGTTAGCAGCAGCTGCCATCGCTTGGCTTTTGGGAAGCTCAACGAGCCAAAAAGTCATATACTTGGTCATGATACTGCTGATTGCCCCGGCATACAGCA	...(((((.....((((((.(((...((((...))))...)))((((((((((((...))))).))))))).))))))....))))).........(((((..(((....)))..)))))	....................(((...((((...))))...)))((((((((((((...))))).))))))).........................(((((..(((....)))..)))))	29	29	32	30
860	979	37	-34.3	-1.21	0.11	18.95	0.0334842	ATTCAGGAACCCTGGCTTCGCGTTAGCAGCAGCTGCCATCGCTTGGCTTTTGGGAAGCTCAACGAGCCAAAAAGTCATATACTTGGTCATGATACTGCTGATTGCCCCGGCATACAGCAT	..(((((.....((((((.(((...((((...))))...)))((((((((((((...))))).))))))).))))))....))))).........(((((..(((....)))..))))).	...................(((...((((...))))...)))((((((((((((...))))).))))))).........................(((((..(((....)))..))))).	29	29	32	30
861	980	37	-34.3	-0.96	0.15	18.96	0.0334681	TTCAGGAACCCTGGCTTCGCGTTAGCAGCAGCTGCCATCGCTTGGCTTTTGGGAAGCTCAACGAGCCAAAAAGTCATATACTTGGTCATGATACTGCTGATTGCCCCGGCATACAGCATC	.(((((.....((((((.(((...((((...))))...)))((((((((((((...))))).))))))).))))))....))))).........(((((..(((....)))..)))))..	..................(((...((((...))))...)))((((((((((((...))))).))))))).........................(((((..(((....)))..)))))..	28	29	33	30
862	981	37	-34.3	-1.74	0.03	18.2	0.0236108	TCAGGAACCCTGGCTTCGCGTTAGCAGCAGCTGCCATCGCTTGGCTTTTGGGAAGCTCAACGAGCCAAAAAGTCATATACTTGGTCATGATACTGCTGATTGCCCCGGCATACAGCATCA	(((((.....((((((.(((...((((...))))...)))((((((((((((...))))).))))))).))))))....))))).........(((((..(((....)))..)))))...	.((((.....(((((..(((...((((...))))...)))((((((((((((...))))).)))))))..)))))....))))..........(((((..(((....)))..)))))...	29	29	33	29
863	982	37	-34.3	-0.8	0.15	18.63	0.0465966	CAGGAACCCTGGCTTCGCGTTAGCAGCAGCTGCCATCGCTTGGCTTTTGGGAAGCTCAACGAGCCAAAAAGTCATATACTTGGTCATGATACTGCTGATTGCCCCGGCATACAGCATCAG	((((.....((((((.(((...((((...))))...)))((((((((((((...))))).))))))).))))))....))))....(((...(((((..(((....)))..)))))))).	((((.....(((((..(((...((((...))))...)))((((((((((((...))))).)))))))..)))))....)))).....((...(((((..(((....)))..)))))))..	29	30	33	28
864	983	37	-34.8	-0.99	0.19	10.94	0.0410489	AGGAACCCTGGCTTCGCGTTAGCAGCAGCTGCCATCGCTTGGCTTTTGGGAAGCTCAACGAGCCAAAAAGTCATATACTTGGTCATGATACTGCTGATTGCCCCGGCATACAGCATCAGG	......(((((....(((...((((...))))...)))((((((((((((...))))).)))))))...(((((..........)))))..(((((..(((....)))..))))))))))	......((((.....(((...((((...))))...)))((((((((((((...))))).)))))))...(((((..........)))))..(((((..(((....)))..))))).))))	29	31	32	28
865	984	37	-35.5	-1.01	0.19	12.24	0.0398634	GGAACCCTGGCTTCGCGTTAGCAGCAGCTGCCATCGCTTGGCTTTTGGGAAGCTCAACGAGCCAAAAAGTCATATACTTGGTCATGATACTGCTGATTGCCCCGGCATACAGCATCAGGT	.....(((((....(((...((((...))))...)))((((((((((((...))))).)))))))...(((((..........)))))..(((((..(((....)))..)))))))))).	.....((((.....(((...((((...))))...)))((((((((((((...))))).)))))))...(((((..........)))))..(((((..(((....)))..))))).)))).	28	31	32	29
866	985	37	-35.5	-0.74	0.21	18.58	0.0251466	GAACCCTGGCTTCGCGTTAGCAGCAGCTGCCATCGCTTGGCTTTTGGGAAGCTCAACGAGCCAAAAAGTCATATACTTGGTCATGATACTGCTGATTGCCCCGGCATACAGCATCAGGTG	....(((((....(((...((((...))))...)))((((((((((((...))))).)))))))...(((((..........)))))..(((((..(((....)))..))))))))))..	....((((.....(((...((((...))))...)))((((((((((((...))))).)))))))...(((((..........)))))..(((((..(((....)))..))))).))))..	28	31	32	29
867	986	37	-35.5	-1.45	0.07	19.03	0.0197571	AACCCTGGCTTCGCGTTAGCAGCAGCTGCCATCGCTTGGCTTTTGGGAAGCTCAACGAGCCAAAAAGTCATATACTTGGTCATGATACTGCTGATTGCCCCGGCATACAGCATCAGGTGC	...(((((....(((...((((...))))...)))((((((((((((...))))).)))))))...(((((..........)))))..(((((..(((....)))..))))))))))...	...((((.....(((...((((...))))...)))((((((((((((...))))).)))))))...(((((..........)))))..(((((..(((....)))..))))).))))...	28	30	33	29
868	987	37	-35.5	-1.22	0.09	19.34	0.0199732	ACCCTGGCTTCGCGTTAGCAGCAGCTGCCATCGCTTGGCTTTTGGGAAGCTCAACGAGCCAAAAAGTCATATACTTGGTCATGATACTGCTGATTGCCCCGGCATACAGCATCAGGTGCA	..(((((....(((...((((...))))...)))((((((((((((...))))).)))))))...(((((..........)))))..(((((..(((....)))..))))))))))....	..((((.....(((...((((...))))...)))((((((((((((...))))).)))))))...(((((..........)))))..(((((..(((....)))..))))).))))....	28	30	33	29
869	988	37	-35.5	-0.94	0.13	20.5	0.024034	CCCTGGCTTCGCGTTAGCAGCAGCTGCCATCGCTTGGCTTTTGGGAAGCTCAACGAGCCAAAAAGTCATATACTTGGTCATGATACTGCTGATTGCCCCGGCATACAGCATCAGGTGCAT	.(((((....(((...((((...))))...)))((((((((((((...))))).)))))))...(((((..........)))))..(((((..(((....)))..)))))))))).....	.((((.....(((...((((...))))...)))((((((((((((...))))).)))))))....(((............)))...(((((..(((....)))..))))).)))).....	27	30	33	30
870	989	37	-35.4	-1.22	0.11	22.05	0.0298206	CCTGGCTTCGCGTTAGCAGCAGCTGCCATCGCTTGGCTTTTGGGAAGCTCAACGAGCCAAAAAGTCATATACTTGGTCATGATACTGCTGATTGCCCCGGCATACAGCATCAGGTGCATA	..((((((.(((...((((...))))...)))((((((((((((...))))).))))))).))))))..(((((((.........(((((..(((....)))..))))))))))))....	...((((..(((...((((...))))...)))((((((((((((...))))).)))))))..))))....((((((.........(((((..(((....)))..))))))))))).....	28	30	32	30
871	990	37	-35.4	-0.98	0.13	17	0.0447537	CTGGCTTCGCGTTAGCAGCAGCTGCCATCGCTTGGCTTTTGGGAAGCTCAACGAGCCAAAAAGTCATATACTTGGTCATGATACTGCTGATTGCCCCGGCATACAGCATCAGGTGCATAG	.((((((.(((...((((...))))...)))((((((((((((...))))).))))))).))))))..(((((((.........(((((..(((....)))..)))))))))))).....	.((((((.(((...((((...))))...)))((((((((((((...))))).))))))).))))))..(((((((..........((((..(((....)))..)))).))))))).....	28	31	31	30
872	991	37	-35.2	-0.65	0.23	19.17	0.028224	TGGCTTCGCGTTAGCAGCAGCTGCCATCGCTTGGCTTTTGGGAAGCTCAACGAGCCAAAAAGTCATATACTTGGTCATGATACTGCTGATTGCCCCGGCATACAGCATCAGGTGCATAGG	((((((.(((...((((...))))...)))((((((((((((...))))).))))))).))))))..(((((((.........(((((..(((....)))..))))))))))))......	((((((.(((...((((...))))...)))((((((((((((...))))).))))))).))))))...((((((.........(((((..(((....)))..))))))))))).......	28	32	30	30
873	992	37	-34.7	-0.39	0.25	19.97	0.0280223	GGCTTCGCGTTAGCAGCAGCTGCCATCGCTTGGCTTTTGGGAAGCTCAACGAGCCAAAAAGTCATATACTTGGTCATGATACTGCTGATTGCCCCGGCATACAGCATCAGGTGCATAGGA	(((((.(((...((((...))))...)))((((((((((((...))))).))))))).)))))...(((((((.........(((((..(((....)))..)))))))))))).......	(((((.(((...((((...))))...)))((((((((((((...))))).))))))).)))))....((((((.........(((((..(((....)))..)))))))))))........	29	32	30	29
874	993	37	-33.2	-0.36	0.37	26.23	0.0178985	GCTTCGCGTTAGCAGCAGCTGCCATCGCTTGGCTTTTGGGAAGCTCAACGAGCCAAAAAGTCATATACTTGGTCATGATACTGCTGATTGCCCCGGCATACAGCATCAGGTGCATAGGAG	.(((((((...((((...))))...)))((((((((((((...))))).))))))).........(((((((.........(((((..(((....)))..))))))))))))....))))	.....(((...((((...))))...)))((((((((((((...))))).)))))))..........((((((.........(((((..(((....)))..))))))))))).........	29	32	30	29
875	994	37	-33.6	-0.99	0.17	23.16	0.027015	CTTCGCGTTAGCAGCAGCTGCCATCGCTTGGCTTTTGGGAAGCTCAACGAGCCAAAAAGTCATATACTTGGTCATGATACTGCTGATTGCCCCGGCATACAGCATCAGGTGCATAGGAGT	(((((((...((((...))))...)))((((((((((((...))))).))))))).........(((((((.........(((((..(((....)))..))))))))))))....)))).	(((((((...((((...))))...)))((((((((((((...))))).)))))))..........((((((..........((((..(((....)))..)))).)))))).....)))).	29	31	30	30
876	995	37	-32.4	-0.58	0.27	24.18	0.0104714	TTCGCGTTAGCAGCAGCTGCCATCGCTTGGCTTTTGGGAAGCTCAACGAGCCAAAAAGTCATATACTTGGTCATGATACTGCTGATTGCCCCGGCATACAGCATCAGGTGCATAGGAGTC	...(((...((((...))))...)))((((((((((((...))))).))))))).........(((((((.........(((((..(((....)))..))))))))))))..........	...(((...((((...))))...)))((((((((((((...))))).)))))))..........((((((..........((((..(((....)))..)))).))))))...........	29	31	30	30
877	996	37	-32.4	-0.22	0.39	24.34	0.0115713	TCGCGTTAGCAGCAGCTGCCATCGCTTGGCTTTTGGGAAGCTCAACGAGCCAAAAAGTCATATACTTGGTCATGATACTGCTGATTGCCCCGGCATACAGCATCAGGTGCATAGGAGTCA	..(((...((((...))))...)))((((((((((((...))))).))))))).........(((((((.........(((((..(((....)))..))))))))))))...........	..(((...((((...))))...)))((((((((((((...))))).)))))))..........((((((..........((((..(((....)))..)))).))))))............	30	31	30	29
878	997	37	-32.4	-0.28	0.29	25.79	0.0113181	CGCGTTAGCAGCAGCTGCCATCGCTTGGCTTTTGGGAAGCTCAACGAGCCAAAAAGTCATATACTTGGTCATGATACTGCTGATTGCCCCGGCATACAGCATCAGGTGCATAGGAGTCAG	.(((...((((...))))...)))((((((((((((...))))).))))))).........(((((((.........(((((..(((....)))..))))))))))))............	.(((...((((...))))...)))((((((((((((...))))).)))))))..........((((((..........((((..(((....)))..)))).)))))).............	30	32	30	28
879	998	37	-34.4	-0.73	0.21	16.25	0.0496425	GCGTTAGCAGCAGCTGCCATCGCTTGGCTTTTGGGAAGCTCAACGAGCCAAAAAGTCATATACTTGGTCATGATACTGCTGATTGCCCCGGCATACAGCATCAGGTGCATAGGAGTCAGC	(((...((((...))))...)))((((((((((((...))))).)))))))...(((((..........)))))...(((((((.((...((((..........))))...)))))))))	(((...((((...))))...)))((((((((((((...))))).)))))))...(((((..........)))))...(((((((.((...((((..........))))...)))))))))	30	32	30	28
880	999	37	-31.9	-0.62	0.17	24.35	0.0124425	CGTTAGCAGCAGCTGCCATCGCTTGGCTTTTGGGAAGCTCAACGAGCCAAAAAGTCATATACTTGGTCATGATACTGCTGATTGCCCCGGCATACAGCATCAGGTGCATAGGAGTCAGCA	((...((((...))))...)).((((((((((((...))))).)))))))...(((((..........)))))..((((((((.((...((((..........))))...))))))))))	.....((((...))))......((((((((((((...))))).)))))))...(((((..........)))))..((((((((.((...((((..........))))...))))))))))	31	31	30	28
881	1000	37	-32.4	-0.66	0.21	22.54	0.0172613	GTTAGCAGCAGCTGCCATCGCTTGGCTTTTGGGAAGCTCAACGAGCCAAAAAGTCATATACTTGGTCATGATACTGCTGATTGCCCCGGCATACAGCATCAGGTGCATAGGAGTCAGCAA	....((((...))))......((((((((((((...))))).)))))))...(((((..........)))))..((((((((.((...((((..........))))...)))))))))).	.....................((((((((((((...))))).)))))))...(((((..........)))))..((((((((.((...((((..........))))...)))))))))).	32	31	29	28
882	1001	37	-32.4	-1.04	0.15	24.41	0.0293296	TTAGCAGCAGCTGCCATCGCTTGGCTTTTGGGAAGCTCAACGAGCCAAAAAGTCATATACTTGGTCATGATACTGCTGATTGCCCCGGCATACAGCATCAGGTGCATAGGAGTCAGCAAT	...((((...))))......((((((((((((...))))).)))))))...(((((..........)))))..((((((((.((...((((..........))))...))))))))))..	...(((.....)))......((((((((((((...))))).)))))))...(((((..........)))))..((((((((.((...((((..........))))...))))))))))..	32	30	29	29
883	1002	37	-32.4	-1.26	0.09	25.45	0.0291913	TAGCAGCAGCTGCCATCGCTTGGCTTTTGGGAAGCTCAACGAGCCAAAAAGTCATATACTTGGTCATGATACTGCTGATTGCCCCGGCATACAGCATCAGGTGCATAGGAGTCAGCAATA	..((((...))))......((((((((((((...))))).)))))))...(((((..........)))))..((((((((.((...((((..........))))...))))))))))...	..((((...))))......((((((((((((...))))).)))))))....(((............)))...((((((((.((...((((..........))))...))))))))))...	33	30	29	28
884	1003	37	-32.4	-0.73	0.27	25.31	0.0349444	AGCAGCAGCTGCCATCGCTTGGCTTTTGGGAAGCTCAACGAGCCAAAAAGTCATATACTTGGTCATGATACTGCTGATTGCCCCGGCATACAGCATCAGGTGCATAGGAGTCAGCAATAG	.((((...))))......((((((((((((...))))).)))))))...(((((..........)))))..((((((((.((...((((..........))))...))))))))))....	.((((...))))......((((((((((((...))))).))))))).....((............))....((((((((.((...((((..........))))...))))))))))....	33	31	29	27
885	1004	37	-32.2	-0.51	0.31	24.06	0.0380399	GCAGCAGCTGCCATCGCTTGGCTTTTGGGAAGCTCAACGAGCCAAAAAGTCATATACTTGGTCATGATACTGCTGATTGCCCCGGCATACAGCATCAGGTGCATAGGAGTCAGCAATAGG	((((...))))......((((((((((((...))))).)))))))...(((((..........)))))..((((((((.((...((((..........))))...)))))))))).....	((((...))))......((((((((((((...))))).)))))))....((((..........))))...((((((((.((...((((..........))))...)))))))))).....	32	32	29	27
886	1005	37	-29.7	0.006	0.49	40.82	0.00362094	CAGCAGCTGCCATCGCTTGGCTTTTGGGAAGCTCAACGAGCCAAAAAGTCATATACTTGGTCATGATACTGCTGATTGCCCCGGCATACAGCATCAGGTGCATAGGAGTCAGCAATAGGG	...((...((((.....((((((((.....((((...))))..))))))))......))))..))....((((((((.((...((((..........))))...))))))))))......	.................(((((((((((...))))).))))))..........................((((((((.((...((((..........))))...))))))))))......	32	32	29	27
887	1006	37	-29.7	0.173	0.54	35.68	0.00357228	AGCAGCTGCCATCGCTTGGCTTTTGGGAAGCTCAACGAGCCAAAAAGTCATATACTTGGTCATGATACTGCTGATTGCCCCGGCATACAGCATCAGGTGCATAGGAGTCAGCAATAGGGA	..((...((((.....((((((((.....((((...))))..))))))))......))))..))....((((((((.((...((((..........))))...)))))))))).......	................(((((((((((...))))).))))))..........................((((((((.((...((((..........))))...)))))))))).......	33	32	28	27
888	1007	37	-29.9	0.204	0.52	34.97	0.00366535	GCAGCTGCCATCGCTTGGCTTTTGGGAAGCTCAACGAGCCAAAAAGTCATATACTTGGTCATGATACTGCTGATTGCCCCGGCATACAGCATCAGGTGCATAGGAGTCAGCAATAGGGAC	.....(.((.....((((((((((((...))))).)))))))...(((((..........)))))..((((((((.((...((((..........))))...))))))))))...)).).	...............(((((((((((...))))).))))))..........................((((((((.((...((((..........))))...))))))))))........	32	32	29	27
889	1008	37	-31.3	-0.57	0.29	21.57	0.0129122	CAGCTGCCATCGCTTGGCTTTTGGGAAGCTCAACGAGCCAAAAAGTCATATACTTGGTCATGATACTGCTGATTGCCCCGGCATACAGCATCAGGTGCATAGGAGTCAGCAATAGGGACT	.(((.......)))(((((((((((...))))).))))))..((((.....))))((((....((.((((((((.((...((((..........))))...)))))))))).))..))))	.............((((((((((((...))))).)))))))..............((((....((.((((((((.((...((((..........))))...)))))))))).))..))))	32	31	29	28
890	1009	37	-31.6	-0.78	0.15	20.2	0.0178524	AGCTGCCATCGCTTGGCTTTTGGGAAGCTCAACGAGCCAAAAAGTCATATACTTGGTCATGATACTGCTGATTGCCCCGGCATACAGCATCAGGTGCATAGGAGTCAGCAATAGGGACTT	....((....))((((((((((((...))))).))))))).((((.....))))((((....((.((((((((.((...((((..........))))...)))))))))).))..)))).	............((((((((((((...))))).)))))))..............((((....((.((((((((.((...((((..........))))...)))))))))).))..)))).	32	31	28	29
891	1010	37	-31.6	-1.07	0.13	23.97	0.0167026	GCTGCCATCGCTTGGCTTTTGGGAAGCTCAACGAGCCAAAAAGTCATATACTTGGTCATGATACTGCTGATTGCCCCGGCATACAGCATCAGGTGCATAGGAGTCAGCAATAGGGACTTT	...((....))((((((((((((...))))).))))))).((((.....))))((((....((.((((((((.((...((((..........))))...)))))))))).))..))))..	...........((((((((((((...))))).)))))))..............((((.......((((((((.((...((((..........))))...)))))))))).....))))..	31	31	28	30
892	1011	37	-31.6	-0.5	0.21	20.69	0.0197439	CTGCCATCGCTTGGCTTTTGGGAAGCTCAACGAGCCAAAAAGTCATATACTTGGTCATGATACTGCTGATTGCCCCGGCATACAGCATCAGGTGCATAGGAGTCAGCAATAGGGACTTTG	..((....))((((((((((((...))))).))))))).((((.....))))((((....((.((((((((.((...((((..........))))...)))))))))).))..))))...	..........((((((((((((...))))).)))))))..............((((....(..((((((((.((...((((..........))))...))))))))))..)..))))...	31	31	28	30
893	1012	37	-32.2	-0.75	0.21	17.63	0.0286549	TGCCATCGCTTGGCTTTTGGGAAGCTCAACGAGCCAAAAAGTCATATACTTGGTCATGATACTGCTGATTGCCCCGGCATACAGCATCAGGTGCATAGGAGTCAGCAATAGGGACTTTGT	.((....))((((((((((((...))))).)))))))..........((..((((....((.((((((((.((...((((..........))))...)))))))))).))..))))..))	.........((((((((((((...))))).)))))))..............((((....((.((((((((.((...((((..........))))...)))))))))).))..))))....	31	31	27	31
894	1013	37	-33.3	-0.86	0.15	13.86	0.0430286	GCCATCGCTTGGCTTTTGGGAAGCTCAACGAGCCAAAAAGTCATATACTTGGTCATGATACTGCTGATTGCCCCGGCATACAGCATCAGGTGCATAGGAGTCAGCAATAGGGACTTTGTG	((....))((((((((((((...))))).))))))).........(((..((((....((.((((((((.((...((((..........))))...)))))))))).))..))))..)))	........((((((((((((...))))).))))))).........(((..((((....((.((((((((.((...((((..........))))...)))))))))).))..))))..)))	31	32	27	30
895	1014	37	-33.5	-0.96	0.13	17.41	0.0477436	CCATCGCTTGGCTTTTGGGAAGCTCAACGAGCCAAAAAGTCATATACTTGGTCATGATACTGCTGATTGCCCCGGCATACAGCATCAGGTGCATAGGAGTCAGCAATAGGGACTTTGTGG	.......((((((((((((...))))).))))))).........(((..((((....((.((((((((.((...((((..........))))...)))))))))).))..))))..))).	.......((((((((((((...))))).)))))))..........((..((((....((.((((((((.((...((((..........))))...)))))))))).))..))))..))..	31	32	27	30
896	1015	37	-33.5	-1.35	0.07	17.63	0.051872	CATCGCTTGGCTTTTGGGAAGCTCAACGAGCCAAAAAGTCATATACTTGGTCATGATACTGCTGATTGCCCCGGCATACAGCATCAGGTGCATAGGAGTCAGCAATAGGGACTTTGTGGA	......((((((((((((...))))).))))))).........(((..((((....((.((((((((.((...((((..........))))...)))))))))).))..))))..)))..	......((((((((((((...))))).)))))))..........((..((((....((.((((((((.((...((((..........))))...)))))))))).))..))))..))...	32	32	26	30
897	1016	37	-33.5	-1.15	0.09	17.16	0.048768	ATCGCTTGGCTTTTGGGAAGCTCAACGAGCCAAAAAGTCATATACTTGGTCATGATACTGCTGATTGCCCCGGCATACAGCATCAGGTGCATAGGAGTCAGCAATAGGGACTTTGTGGAA	.....((((((((((((...))))).))))))).........(((..((((....((.((((((((.((...((((..........))))...)))))))))).))..))))..)))...	.....((((((((((((...))))).)))))))..........((..((((....((.((((((((.((...((((..........))))...)))))))))).))..))))..))....	33	32	25	30
898	1017	37	-33.5	-1.17	0.09	17.43	0.0454117	TCGCTTGGCTTTTGGGAAGCTCAACGAGCCAAAAAGTCATATACTTGGTCATGATACTGCTGATTGCCCCGGCATACAGCATCAGGTGCATAGGAGTCAGCAATAGGGACTTTGTGGAAG	....((((((((((((...))))).))))))).........(((..((((....((.((((((((.((...((((..........))))...)))))))))).))..))))..)))....	....((((((((((((...))))).)))))))..........((..((((....((.((((((((.((...((((..........))))...)))))))))).))..))))..)).....	32	33	25	30
899	1018	37	-33.5	-0.56	0.27	12.69	0.0400779	CGCTTGGCTTTTGGGAAGCTCAACGAGCCAAAAAGTCATATACTTGGTCATGATACTGCTGATTGCCCCGGCATACAGCATCAGGTGCATAGGAGTCAGCAATAGGGACTTTGTGGAAGG	...((((((((((((...))))).))))))).........(((..((((....((.((((((((.((...((((..........))))...)))))))))).))..))))..))).....	...((((((((((((...))))).))))))).........(((..((((....((.((((((((.((...((((..........))))...)))))))))).))..))))..))).....	32	34	25	29
900	1019	37	-33.5	-1.12	0.13	11.63	0.0398766	GCTTGGCTTTTGGGAAGCTCAACGAGCCAAAAAGTCATATACTTGGTCATGATACTGCTGATTGCCCCGGCATACAGCATCAGGTGCATAGGAGTCAGCAATAGGGACTTTGTGGAAGGT	..((((((((((((...))))).))))))).........(((..((((....((.((((((((.((...((((..........))))...)))))))))).))..))))..)))......	..((((((((((((...))))).))))))).........(((..((((....((.((((((((.((...((((..........))))...)))))))))).))..))))..)))......	32	34	24	30
901	1020	37	-33.5	-1	0.09	12.01	0.039939	CTTGGCTTTTGGGAAGCTCAACGAGCCAAAAAGTCATATACTTGGTCATGATACTGCTGATTGCCCCGGCATACAGCATCAGGTGCATAGGAGTCAGCAATAGGGACTTTGTGGAAGGTA	.((((((((((((...))))).))))))).........(((..((((....((.((((((((.((...((((..........))))...)))))))))).))..))))..))).......	.((((((((((((...))))).))))))).........(((..((((....((.((((((((.((...((((..........))))...)))))))))).))..))))..))).......	33	33	24	30
902	1021	37	-33.3	-1.06	0.17	14.25	0.0315424	TTGGCTTTTGGGAAGCTCAACGAGCCAAAAAGTCATATACTTGGTCATGATACTGCTGATTGCCCCGGCATACAGCATCAGGTGCATAGGAGTCAGCAATAGGGACTTTGTGGAAGGTAT	((((((((((((...))))).))))))).........(((..((((....((.((((((((.((...((((..........))))...)))))))))).))..))))..)))........	((((((((((((...))))).))))))).........(((..((((....((.((((((((.((...((((..........))))...)))))))))).))..))))..)))........	33	33	23	31
903	1022	37	-32.8	-1.09	0.17	21.48	0.0280373	TGGCTTTTGGGAAGCTCAACGAGCCAAAAAGTCATATACTTGGTCATGATACTGCTGATTGCCCCGGCATACAGCATCAGGTGCATAGGAGTCAGCAATAGGGACTTTGTGGAAGGTATG	(((((((((((...))))).))))))........(((((((((((....((.((((((((.((...((((..........))))...)))))))))).))..)))).......)))))))	(((((((((((...))))).))))))...............((((....((.((((((((.((...((((..........))))...)))))))))).))..))))..............	33	34	23	30
904	1023	37	-33.5	-1.11	0.09	21.74	0.0725425	GGCTTTTGGGAAGCTCAACGAGCCAAAAAGTCATATACTTGGTCATGATACTGCTGATTGCCCCGGCATACAGCATCAGGTGCATAGGAGTCAGCAATAGGGACTTTGTGGAAGGTATGT	((((((((((...))))).)))))........((((((((((((....((.((((((((.((...((((..........))))...)))))))))).))..)))).......))))))))	((((((((((...))))).)))))........((((((((((((....((.((((((((.((...((((..........))))...)))))))))).))..)))).......))))))))	33	34	23	30
905	1024	37	-29.6	-0.23	0.43	30.05	0.0344764	GCTTTTGGGAAGCTCAACGAGCCAAAAAGTCATATACTTGGTCATGATACTGCTGATTGCCCCGGCATACAGCATCAGGTGCATAGGAGTCAGCAATAGGGACTTTGTGGAAGGTATGTC	(((((((((...))))).)))).........((((((((((((....((.((((((((.((...((((..........))))...)))))))))).))..)))).......)))))))).	...............................((((((((((((....((.((((((((.((...((((..........))))...)))))))))).))..)))).......)))))))).	33	33	24	30
906	1025	37	-28	0.009	0.54	29.9	0.0129888	CTTTTGGGAAGCTCAACGAGCCAAAAAGTCATATACTTGGTCATGATACTGCTGATTGCCCCGGCATACAGCATCAGGTGCATAGGAGTCAGCAATAGGGACTTTGTGGAAGGTATGTCA	((((((.(((((((.....(((((............)))))........((((((((.((...((((..........))))...))))))))))...))).)))).))))))........	..(((((.............))))).............((((.......((((((((.((...((((..........))))...)))))))))).....)))).................	34	32	24	30
907	1026	37	-27.8	-0.04	0.45	21.48	0.0204397	TTTTGGGAAGCTCAACGAGCCAAAAAGTCATATACTTGGTCATGATACTGCTGATTGCCCCGGCATACAGCATCAGGTGCATAGGAGTCAGCAATAGGGACTTTGTGGAAGGTATGTCAG	((((((.............))))))....((((((((((((....((.((((((((.((...((((..........))))...)))))))))).))..)))).......))))))))...	((((((.............))))))......(((((.((((....((.((((((((.((...((((..........))))...)))))))))).))..))))........))))).....	34	33	23	30
908	1027	37	-26.9	0.688	0.7	26.06	0.0156981	TTTGGGAAGCTCAACGAGCCAAAAAGTCATATACTTGGTCATGATACTGCTGATTGCCCCGGCATACAGCATCAGGTGCATAGGAGTCAGCAATAGGGACTTTGTGGAAGGTATGTCAGG	(((((.............))))).....((((((((((((....((.((((((((.((...((((..........))))...)))))))))).))..)))).......))))))))....	(((((.............))))).............((((....((.((((((((.((...((((..........))))...)))))))))).))..))))...................	34	34	23	29
909	1028	37	-26.1	0.628	0.66	30.88	0.00890322	TTGGGAAGCTCAACGAGCCAAAAAGTCATATACTTGGTCATGATACTGCTGATTGCCCCGGCATACAGCATCAGGTGCATAGGAGTCAGCAATAGGGACTTTGTGGAAGGTATGTCAGGT	.......((((...)))).........((((((((((((....((.((((((((.((...((((..........))))...)))))))))).))..)))).......)))))))).....	...................................((((....((.((((((((.((...((((..........))))...)))))))))).))..))))....................	34	34	23	29
910	1029	37	-26.1	0.644	0.72	32.71	0.0140487	TGGGAAGCTCAACGAGCCAAAAAGTCATATACTTGGTCATGATACTGCTGATTGCCCCGGCATACAGCATCAGGTGCATAGGAGTCAGCAATAGGGACTTTGTGGAAGGTATGTCAGGTG	......((((...)))).........((((((((((((....((.((((((((.((...((((..........))))...)))))))))).))..)))).......))))))))......	..................................((((.......((((((((.((...((((..........))))...)))))))))).....)))).....................	34	35	23	28
911	1030	37	-26.1	0.826	0.74	31.38	0.0146387	GGGAAGCTCAACGAGCCAAAAAGTCATATACTTGGTCATGATACTGCTGATTGCCCCGGCATACAGCATCAGGTGCATAGGAGTCAGCAATAGGGACTTTGTGGAAGGTATGTCAGGTGG	.....((((...)))).........((((((((((((....((.((((((((.((...((((..........))))...)))))))))).))..)))).......)))))))).......	.................................((((.......((((((((.((...((((..........))))...)))))))))).....))))......................	34	36	23	27
912	1031	37	-26.5	0.776	0.78	29.16	0.0195331	GGAAGCTCAACGAGCCAAAAAGTCATATACTTGGTCATGATACTGCTGATTGCCCCGGCATACAGCATCAGGTGCATAGGAGTCAGCAATAGGGACTTTGTGGAAGGTATGTCAGGTGGG	..............(((....(.(((((((..((((....((.((((((((.((...((((..........))))...)))))))))).))..))))..)).....))))).)...))).	................................((((....((.((((((((.((...((((..........))))...)))))))))).))..)))).......................	34	36	23	27
913	1032	37	-26.5	0.641	0.72	31.1	0.0144391	GAAGCTCAACGAGCCAAAAAGTCATATACTTGGTCATGATACTGCTGATTGCCCCGGCATACAGCATCAGGTGCATAGGAGTCAGCAATAGGGACTTTGTGGAAGGTATGTCAGGTGGGA	.............(((....(.(((((((..((((....((.((((((((.((...((((..........))))...)))))))))).))..))))..)).....))))).)...)))..	...............................((((....((.((((((((.((...((((..........))))...)))))))))).))..))))........................	35	35	23	27
914	1033	37	-27.6	0.157	0.54	32.47	0.0409409	AAGCTCAACGAGCCAAAAAGTCATATACTTGGTCATGATACTGCTGATTGCCCCGGCATACAGCATCAGGTGCATAGGAGTCAGCAATAGGGACTTTGTGGAAGGTATGTCAGGTGGGAC	..((((...))))......(((...(((((((.(((.....((((((((.((...((((..........))))...))))))))))......(((((....))))))))))))))).)))	..((((...))))..............((((..........((((((((.((...((((..........))))...))))))))))........................))))......	35	34	24	27
915	1034	37	-29.3	-0.08	0.43	20.39	0.0637685	AGCTCAACGAGCCAAAAAGTCATATACTTGGTCATGATACTGCTGATTGCCCCGGCATACAGCATCAGGTGCATAGGAGTCAGCAATAGGGACTTTGTGGAAGGTATGTCAGGTGGGACT	.((((...)))).....((((...(((((((.(((.....((((((((.((...((((..........))))...))))))))))......(((((....))))))))))))))).))))	.((((...)))).....((((...(((((((.(((.....((((((((.((...((((..........))))...))))))))))......(((((....))))))))))))))).))))	34	34	24	28
916	1035	37	-30	-0.09	0.43	17.42	0.0552207	GCTCAACGAGCCAAAAAGTCATATACTTGGTCATGATACTGCTGATTGCCCCGGCATACAGCATCAGGTGCATAGGAGTCAGCAATAGGGACTTTGTGGAAGGTATGTCAGGTGGGACTT	((((...))))....(((((...(((((((.(((.....((((((((.((...((((..........))))...))))))))))......(((((....))))))))))))))).)))))	((((...))))....(((((...(((((((.(((.....((((((((.((...((((..........))))...))))))))))......(((((....))))))))))))))).)))))	33	34	24	29
917	1036	37	-28.9	0.065	0.49	30.54	0.0330897	CTCAACGAGCCAAAAAGTCATATACTTGGTCATGATACTGCTGATTGCCCCGGCATACAGCATCAGGTGCATAGGAGTCAGCAATAGGGACTTTGTGGAAGGTATGTCAGGTGGGACTTG	..............(((((...(((((((.(((.....((((((((.((...((((..........))))...))))))))))......(((((....))))))))))))))).))))).	......(((..................((((.......((((((((.((...((((..........))))...)))))))))).....))))........................))).	33	34	24	29
918	1037	37	-29.9	-0.03	0.39	27.61	0.0394945	TCAACGAGCCAAAAAGTCATATACTTGGTCATGATACTGCTGATTGCCCCGGCATACAGCATCAGGTGCATAGGAGTCAGCAATAGGGACTTTGTGGAAGGTATGTCAGGTGGGACTTGG	....((((((.....(.(((((((..((((....((.((((((((.((...((((..........))))...)))))))))).))..))))..)).....))))).).....)).)))).	....((((((.......((((.....((((....((.((((((((.((...((((..........))))...)))))))))).))..))))..........)))).......)).)))).	33	35	23	29
919	1038	37	-30	-0.09	0.43	32.06	0.0269025	CAACGAGCCAAAAAGTCATATACTTGGTCATGATACTGCTGATTGCCCCGGCATACAGCATCAGGTGCATAGGAGTCAGCAATAGGGACTTTGTGGAAGGTATGTCAGGTGGGACTTGGG	.......(((...((((...(((((((.(((.....((((((((.((...((((..........))))...))))))))))......(((((....))))))))))))))).))))))).	..............(((....(((((..........((((((((.((...((((..........))))...))))))))))........................)))))..))).....	33	36	23	28
920	1039	37	-30.9	-0.37	0.33	25.84	0.0401872	AACGAGCCAAAAAGTCATATACTTGGTCATGATACTGCTGATTGCCCCGGCATACAGCATCAGGTGCATAGGAGTCAGCAATAGGGACTTTGTGGAAGGTATGTCAGGTGGGACTTGGGT	.....(((...(((((...(((((((.(((.....((((((((.((...((((..........))))...))))))))))......(((((....))))))))))))))).))))).)))	......((...(((((...(((((((.(((.....((((((((.((...((((..........))))...)))))))))).......((((....)))).)))))))))).))))).)).	33	36	22	29
921	1040	37	-31.6	-0.39	0.35	21.62	0.0320135	ACGAGCCAAAAAGTCATATACTTGGTCATGATACTGCTGATTGCCCCGGCATACAGCATCAGGTGCATAGGAGTCAGCAATAGGGACTTTGTGGAAGGTATGTCAGGTGGGACTTGGGTT	...((((...(((((...(((((((.(((.....((((((((.((...((((..........))))...))))))))))......(((((....))))))))))))))).))))).))))	....(((...(((((...(((((((.(((.....((((((((.((...((((..........))))...))))))))))......(((((....))))))))))))))).))))).))).	32	36	22	30
922	1041	37	-32.7	-0.13	0.37	20.5	0.0352126	CGAGCCAAAAAGTCATATACTTGGTCATGATACTGCTGATTGCCCCGGCATACAGCATCAGGTGCATAGGAGTCAGCAATAGGGACTTTGTGGAAGGTATGTCAGGTGGGACTTGGGTTG	(((.(((...((((...(((((((.(((.....((((((((.((...((((..........))))...))))))))))......(((((....))))))))))))))).))))))).)))	(((.(((...((((...(((((((.(((.....((((((((.((...((((..........))))...))))))))))......(((((....))))))))))))))).))))))).)))	31	37	22	30
923	1042	37	-32.4	-1.17	0.09	18.95	0.0533689	GAGCCAAAAAGTCATATACTTGGTCATGATACTGCTGATTGCCCCGGCATACAGCATCAGGTGCATAGGAGTCAGCAATAGGGACTTTGTGGAAGGTATGTCAGGTGGGACTTGGGTTGA	.((((...(((((...(((((((.(((.....((((((((.((...((((..........))))...))))))))))......(((((....))))))))))))))).))))).))))..	.((((...(((((...(((((((.(((.....((((((((.((...((((..........))))...))))))))))......(((((....))))))))))))))).))))).))))..	32	37	21	30
924	1043	37	-31.9	-0.56	0.29	16.81	0.0550662	AGCCAAAAAGTCATATACTTGGTCATGATACTGCTGATTGCCCCGGCATACAGCATCAGGTGCATAGGAGTCAGCAATAGGGACTTTGTGGAAGGTATGTCAGGTGGGACTTGGGTTGAT	((((...(((((...(((((((.(((.....((((((((.((...((((..........))))...))))))))))......(((((....))))))))))))))).))))).))))...	((((...(((((...(((((((.(((.....((((((((.((...((((..........))))...))))))))))......(((((....))))))))))))))).))))).))))...	32	36	21	31
925	1044	37	-30.7	-0.11	0.41	18.83	0.0465502	GCCAAAAAGTCATATACTTGGTCATGATACTGCTGATTGCCCCGGCATACAGCATCAGGTGCATAGGAGTCAGCAATAGGGACTTTGTGGAAGGTATGTCAGGTGGGACTTGGGTTGATG	(((...(((((...(((((((.(((.....((((((((.((...((((..........))))...))))))))))......(((((....))))))))))))))).))))).))).....	(((...(((((...(((((((.(((.....((((((((.((...((((..........))))...))))))))))......(((((....))))))))))))))).))))).))).....	31	37	21	31
926	1045	37	-29.9	-0.05	0.41	20.14	0.0366911	CCAAAAAGTCATATACTTGGTCATGATACTGCTGATTGCCCCGGCATACAGCATCAGGTGCATAGGAGTCAGCAATAGGGACTTTGTGGAAGGTATGTCAGGTGGGACTTGGGTTGATGT	(((...((((...(((((((.(((.....((((((((.((...((((..........))))...))))))))))......(((((....))))))))))))))).)))))))........	((....((((...(((((((.(((.....((((((((.((...((((..........))))...))))))))))......(((((....))))))))))))))).)))).))........	31	36	21	32
927	1046	37	-28.9	-0.17	0.41	20.1	0.0413961	CAAAAAGTCATATACTTGGTCATGATACTGCTGATTGCCCCGGCATACAGCATCAGGTGCATAGGAGTCAGCAATAGGGACTTTGTGGAAGGTATGTCAGGTGGGACTTGGGTTGATGTT	....(((((...(((((((.(((.....((((((((.((...((((..........))))...))))))))))......(((((....))))))))))))))).)))))...........	....(((((...(((((((.(((.....((((((((.((...((((..........))))...))))))))))......(((((....))))))))))))))).)))))...........	31	36	20	33
928	1047	37	-28.9	-0.06	0.43	22.31	0.0798681	AAAAAGTCATATACTTGGTCATGATACTGCTGATTGCCCCGGCATACAGCATCAGGTGCATAGGAGTCAGCAATAGGGACTTTGTGGAAGGTATGTCAGGTGGGACTTGGGTTGATGTTG	...(((((...(((((((.(((.....((((((((.((...((((..........))))...))))))))))......(((((....))))))))))))))).)))))............	...(((((...(((((((.(((.....((((((((.((...((((..........))))...)))))))))).......((((....)))).)))))))))).)))))............	31	37	19	33
929	1048	37	-28.9	0	0.5	25.93	0.0770302	AAAAGTCATATACTTGGTCATGATACTGCTGATTGCCCCGGCATACAGCATCAGGTGCATAGGAGTCAGCAATAGGGACTTTGTGGAAGGTATGTCAGGTGGGACTTGGGTTGATGTTGT	..(((((...(((((((.(((.....((((((((.((...((((..........))))...))))))))))......(((((....))))))))))))))).))))).............	..(((((...(((((((.(((.....((((((((.((...((((..........))))...)))))))))).......((((....)))).)))))))))).))))).............	30	37	19	34
930	1049	37	-28.9	0.522	0.68	27.55	0.0726633	AAAGTCATATACTTGGTCATGATACTGCTGATTGCCCCGGCATACAGCATCAGGTGCATAGGAGTCAGCAATAGGGACTTTGTGGAAGGTATGTCAGGTGGGACTTGGGTTGATGTTGTC	.(((((...(((((((.(((.....((((((((.((...((((..........))))...))))))))))......(((((....))))))))))))))).)))))..............	.(((((...(((((((.(((.....((((((((.((...((((..........))))...)))))))))).......((((....)))).)))))))))).)))))..............	29	37	20	34
931	1050	37	-28.5	0.601	0.7	33.7	0.0441107	AAGTCATATACTTGGTCATGATACTGCTGATTGCCCCGGCATACAGCATCAGGTGCATAGGAGTCAGCAATAGGGACTTTGTGGAAGGTATGTCAGGTGGGACTTGGGTTGATGTTGTCT	(((((...(((((((.(((.....((((((((.((...((((..........))))...))))))))))......(((((....))))))))))))))).)))))...............	(((((...(((((((.(((.....((((((((.((...((((..........))))...)))))))))).......((((....)))).)))))))))).)))))...............	28	37	20	35
932	1051	37	-27.2	0.811	0.72	44.41	0.0100431	AGTCATATACTTGGTCATGATACTGCTGATTGCCCCGGCATACAGCATCAGGTGCATAGGAGTCAGCAATAGGGACTTTGTGGAAGGTATGTCAGGTGGGACTTGGGTTGATGTTGTCTT	.......(((..((((....((.((((((((.((...((((..........))))...)))))))))).))..))))..))).((((.(((((((.(........).)))))))..))))	............((((.......((((((((.((...((((..........))))...)))))))))).....))))...........................................	27	37	20	36
933	1052	37	-28	0.98	0.82	40.83	0.0210483	GTCATATACTTGGTCATGATACTGCTGATTGCCCCGGCATACAGCATCAGGTGCATAGGAGTCAGCAATAGGGACTTTGTGGAAGGTATGTCAGGTGGGACTTGGGTTGATGTTGTCTTG	......(((..((((....((.((((((((.((...((((..........))))...)))))))))).))..))))..))).((((.(((((((.(........).)))))))..)))).	...........((((.......((((((((.((...((((..........))))...)))))))))).....)))).............(((((............))))).........	26	38	20	36
934	1053	37	-28	1.139	0.9	43.16	0.016117	TCATATACTTGGTCATGATACTGCTGATTGCCCCGGCATACAGCATCAGGTGCATAGGAGTCAGCAATAGGGACTTTGTGGAAGGTATGTCAGGTGGGACTTGGGTTGATGTTGTCTTGG	.....(((..((((....((.((((((((.((...((((..........))))...)))))))))).))..))))..))).((((.(((((((.(........).)))))))..))))..	..........((((.......((((((((.((...((((..........))))...)))))))))).....)))).............................................	26	38	20	36
935	1054	37	-28	0.926	0.78	42.78	0.0171599	CATATACTTGGTCATGATACTGCTGATTGCCCCGGCATACAGCATCAGGTGCATAGGAGTCAGCAATAGGGACTTTGTGGAAGGTATGTCAGGTGGGACTTGGGTTGATGTTGTCTTGGA	....(((..((((....((.((((((((.((...((((..........))))...)))))))))).))..))))..))).((((.(((((((.(........).)))))))..))))...	.........((((.......((((((((.((...((((..........))))...)))))))))).....))))..............................................	27	38	20	35
936	1055	37	-28	0.643	0.74	43.22	0.0218962	ATATACTTGGTCATGATACTGCTGATTGCCCCGGCATACAGCATCAGGTGCATAGGAGTCAGCAATAGGGACTTTGTGGAAGGTATGTCAGGTGGGACTTGGGTTGATGTTGTCTTGGAA	...(((..((((....((.((((((((.((...((((..........))))...)))))))))).))..))))..))).((((.(((((((.(........).)))))))..))))....	........((((.......((((((((.((...((((..........))))...)))))))))).....))))...............................................	28	38	19	35
937	1056	37	-28	1.246	0.86	42.41	0.0247697	TATACTTGGTCATGATACTGCTGATTGCCCCGGCATACAGCATCAGGTGCATAGGAGTCAGCAATAGGGACTTTGTGGAAGGTATGTCAGGTGGGACTTGGGTTGATGTTGTCTTGGAAC	..(((..((((....((.((((((((.((...((((..........))))...)))))))))).))..))))..))).((((.(((((((.(........).)))))))..)))).....	.......((((.......((((((((.((...((((..........))))...)))))))))).....))))..............(((..............)))..............	27	38	20	35
938	1057	37	-28	0.782	0.84	41.45	0.0221657	ATACTTGGTCATGATACTGCTGATTGCCCCGGCATACAGCATCAGGTGCATAGGAGTCAGCAATAGGGACTTTGTGGAAGGTATGTCAGGTGGGACTTGGGTTGATGTTGTCTTGGAACA	.(((..((((....((.((((((((.((...((((..........))))...)))))))))).))..))))..))).((((.(((((((.(........).)))))))..))))......	......((((.......((((((((.((...((((..........))))...)))))))))).....)))).............(((((.(........).)))))..............	28	38	20	34
939	1058	37	-28.2	0.939	0.84	38.29	0.0232222	TACTTGGTCATGATACTGCTGATTGCCCCGGCATACAGCATCAGGTGCATAGGAGTCAGCAATAGGGACTTTGTGGAAGGTATGTCAGGTGGGACTTGGGTTGATGTTGTCTTGGAACAT	(((..((((....((.((((((((.((...((((..........))))...)))))))))).))..))))..))).((((.(((((((.(........).)))))))..)))).......	.....((((.......((((((((.((...((((..........))))...)))))))))).....))))........(...((((((.(........).))))))....).........	27	38	20	35
940	1059	37	-27.6	1.148	0.86	42.96	0.0161462	ACTTGGTCATGATACTGCTGATTGCCCCGGCATACAGCATCAGGTGCATAGGAGTCAGCAATAGGGACTTTGTGGAAGGTATGTCAGGTGGGACTTGGGTTGATGTTGTCTTGGAACATG	....((((....((.((((((((.((...((((..........))))...)))))))))).))..)))).(((..((((.(((((((.(........).)))))))..))))...)))..	....((((.......((((((((.((...((((..........))))...)))))))))).....))))..............(((..............))).................	27	39	20	34
941	1060	37	-28.5	1.129	0.86	39.88	0.0440362	CTTGGTCATGATACTGCTGATTGCCCCGGCATACAGCATCAGGTGCATAGGAGTCAGCAATAGGGACTTTGTGGAAGGTATGTCAGGTGGGACTTGGGTTGATGTTGTCTTGGAACATGG	......((((....(((((..(((....)))..))))).((((.(((.....((((((..((((..((.(.(((........))).).))..)))).))))))..)))))))...)))).	......((((....(((((..(((....)))..))))).((((..(......((((((..((((..((.(.(((........))).).))..)))).))))))...).))))...)))).	26	40	20	34
942	1061	37	-28.8	0.578	0.68	35.61	0.0536515	TTGGTCATGATACTGCTGATTGCCCCGGCATACAGCATCAGGTGCATAGGAGTCAGCAATAGGGACTTTGTGGAAGGTATGTCAGGTGGGACTTGGGTTGATGTTGTCTTGGAACATGGA	....(((((....(((((..(((....)))..))))).((((.(((.....((((((..((((..((.(.(((........))).).))..)))).))))))..)))))))...))))).	.....((((....(((((..(((....)))..))))).((((.(((.....((((((..((((..((.(.(((........))).).))..)))).))))))..)))))))...))))..	27	40	19	34
943	1062	37	-28.8	0.846	0.7	37.3	0.0509503	TGGTCATGATACTGCTGATTGCCCCGGCATACAGCATCAGGTGCATAGGAGTCAGCAATAGGGACTTTGTGGAAGGTATGTCAGGTGGGACTTGGGTTGATGTTGTCTTGGAACATGGAG	...(((((....(((((..(((....)))..))))).((((.(((.....((((((..((((..((.(.(((........))).).))..)))).))))))..)))))))...)))))..	....((((....(((((..(((....)))..))))).((((.(((.....((((((..((((..((.(.(((........))).).))..)))).))))))..)))))))...))))...	27	41	19	33
944	1063	37	-28.8	0.66	0.68	35.84	0.0531451	GGTCATGATACTGCTGATTGCCCCGGCATACAGCATCAGGTGCATAGGAGTCAGCAATAGGGACTTTGTGGAAGGTATGTCAGGTGGGACTTGGGTTGATGTTGTCTTGGAACATGGAGG	..(((((....(((((..(((....)))..))))).((((.(((.....((((((..((((..((.(.(((........))).).))..)))).))))))..)))))))...)))))...	...((((....(((((..(((....)))..))))).((((.(((.....((((((..((((..((.(.(((........))).).))..)))).))))))..)))))))...))))....	27	42	19	32
945	1064	37	-28.8	0.537	0.64	31.61	0.0576067	GTCATGATACTGCTGATTGCCCCGGCATACAGCATCAGGTGCATAGGAGTCAGCAATAGGGACTTTGTGGAAGGTATGTCAGGTGGGACTTGGGTTGATGTTGTCTTGGAACATGGAGGT	.(((((....(((((..(((....)))..))))).((((.(((.....((((((..((((..((.(.(((........))).).))..)))).))))))..)))))))...)))))....	..((((....(((((..(((....)))..))))).((((.(((.....((((((..((((..((.(.(((........))).).))..)))).))))))..)))))))...)))).....	27	41	19	33
946	1065	37	-28.8	0.679	0.72	28.67	0.060408	TCATGATACTGCTGATTGCCCCGGCATACAGCATCAGGTGCATAGGAGTCAGCAATAGGGACTTTGTGGAAGGTATGTCAGGTGGGACTTGGGTTGATGTTGTCTTGGAACATGGAGGTT	(((((....(((((..(((....)))..))))).((((.(((.....((((((..((((..((.(.(((........))).).))..)))).))))))..)))))))...))))).....	.((((....(((((..(((....)))..))))).((((.(((.....((((((..((((..((.(.(((........))).).))..)))).))))))..)))))))...))))......	27	40	19	34
947	1066	37	-28.3	0.96	0.82	40.54	0.0581417	CATGATACTGCTGATTGCCCCGGCATACAGCATCAGGTGCATAGGAGTCAGCAATAGGGACTTTGTGGAAGGTATGTCAGGTGGGACTTGGGTTGATGTTGTCTTGGAACATGGAGGTTG	((((....(((((..(((....)))..))))).((((.(((.....((((((..((((..((.(.(((........))).).))..)))).))))))..)))))))...)))).......	.........((((..(((....)))..))))..((((.........((((((..((((..((.(.(((........))).).))..)))).)))))).....))))..............	27	41	19	33
[truncated: 9,741 more rows]
