# Supplementary material for: ScanFold: an approach for genome-wide discovery of local RNA structural elements—applications to Zika virus and HIV
Source: PeerJ. 2018 Dec 18;6:e6136. doi: 10.7717/peerj.6136 (PMC6317755; doi:10.7717/peerj.6136)
Supplement: Supplemental Information 8 — The log file is separated into two portions. The first half (row 1 to 87,448) contains a table for each nucleotide in the sequence. These tables contain the cumulative base pairing information for that nucleotide as predicted throughout the scan. Column A refers to the i-nucleotide of the sequence. Column B refers to the coordinate of the j base pair. The total number of windows the i-j pair appears, as well as the total number of windows the i-nucleotide appears are reported in column D. The average window minimum free energy, z-score, and ensemble diversity of each i-j pair are reported in columns E-G respectively. Column H reports the sum of z-scores for each i-j pair, which is used to calculate the coverage-normalized z-score (calculated as the sum of z-score over total windows in which i-nucleotide appeared) as reported in Column I. Column J reports a summary of the base pairs predicted for each i-nucleotide. The second half of the log file, starting at row 87,449, is a list of the most favorable i-j pairs (column B and C) associated with the i-nucleotide listed in column A. In places where this nucleotide competed with other i-nucleotides for the same j-nucleotide, the “winning” i-j pair is reported and denoted with an asterisk (in some cases the winning i-j pair does not contain the original i-nucleotide or may be unpaired). Columns D, E, and F, contain the average window minimum free energy, z-score and ensemble diversity for the corresponding i-j pair. [file peerj-06-6136-s008.xlsx]

## Sheet: KJ776791_ZIKV_genome.win120.stp
i	BP(j)	Nuc	#BP_Win	avgMFE	avgZ	avgED	SumZ	SumZ/#TotalWindows	BPs= 0
nt-1	-	A	1	-	-	-	-	-
1	NoBP	A	1	-33.4	-2.99	11.93	-2.99	-2.99
i	BP(j)	Nuc	#BP_Win	avgMFE	avgZ	avgED	SumZ	SumZ/#TotalWindows	BPs= 0
nt-2	-	G	2	-	-	-	-	-
2	NoBP	G	2	-33.4	-2.73	11.92	-5.46	-2.73
i	BP(j)	Nuc	#BP_Win	avgMFE	avgZ	avgED	SumZ	SumZ/#TotalWindows	BPs= 0
nt-3	-	U	3	-	-	-	-	-
3	NoBP	U	3	-33.4	-2.7	11.93	-8.1	-2.7
i	BP(j)	Nuc	#BP_Win	avgMFE	avgZ	avgED	SumZ	SumZ/#TotalWindows	BPs= 1
nt-4	-	U	4	-	-	-	-	-
4	70	A	4	-33.35	-2.83	11.93	-11.32	-2.83
i	BP(j)	Nuc	#BP_Win	avgMFE	avgZ	avgED	SumZ	SumZ/#TotalWindows	BPs= 1
nt-5	-	G	5	-	-	-	-	-
5	69	C	5	-33.18	-2.92	11.87	-14.59	-2.92
i	BP(j)	Nuc	#BP_Win	avgMFE	avgZ	avgED	SumZ	SumZ/#TotalWindows	BPs= 1
nt-6	-	U	6	-	-	-	-	-
6	68	A	6	-32.42	-2.74	11.96	-16.41	-2.74
i	BP(j)	Nuc	#BP_Win	avgMFE	avgZ	avgED	SumZ	SumZ/#TotalWindows	BPs= 1
nt-7	-	U	7	-	-	-	-	-
7	67	A	7	-31.79	-2.61	12.04	-18.3	-2.61
i	BP(j)	Nuc	#BP_Win	avgMFE	avgZ	avgED	SumZ	SumZ/#TotalWindows	BPs= 1
nt-8	-	G	8	-	-	-	-	-
8	66	C	8	-31.22	-2.5	12.18	-20	-2.5
i	BP(j)	Nuc	#BP_Win	avgMFE	avgZ	avgED	SumZ	SumZ/#TotalWindows	BPs= 2
nt-9	-	A	9	-	-	-	-	-
9	65	U	8	-31.22	-2.5	12.18	-20	-2.22
9	73	U	1	-24.5	-1.32	25.48	-1.32	-0.15
i	BP(j)	Nuc	#BP_Win	avgMFE	avgZ	avgED	SumZ	SumZ/#TotalWindows	BPs= 2
nt-10	-	U	10	-	-	-	-	-
10	64	A	8	-31.22	-2.5	12.18	-20	-2
10	72	G	2	-24.4	-1.16	24.75	-2.31	-0.23
i	BP(j)	Nuc	#BP_Win	avgMFE	avgZ	avgED	SumZ	SumZ/#TotalWindows	BPs= 2
nt-11	-	C	11	-	-	-	-	-
11	62	G	9	-30.43	-2.3	13.3	-20.73	-1.88
11	71	G	2	-24.4	-1.16	24.75	-2.31	-0.21
i	BP(j)	Nuc	#BP_Win	avgMFE	avgZ	avgED	SumZ	SumZ/#TotalWindows	BPs= 2
nt-12	-	U	12	-	-	-	-	-
12	61	A	9	-30.43	-2.3	13.3	-20.73	-1.73
12	70	A	2	-24.4	-1.16	24.75	-2.31	-0.19
12	NoBP	U	1	-23.1	-0.49	22.33	-0.49	-0.04
i	BP(j)	Nuc	#BP_Win	avgMFE	avgZ	avgED	SumZ	SumZ/#TotalWindows	BPs= 2
nt-13	-	G	13	-	-	-	-	-
13	60	C	9	-30.43	-2.3	13.3	-20.73	-1.59
13	69	C	2	-24.4	-1.16	24.75	-2.31	-0.18
13	NoBP	G	2	-23.1	-0.58	23	-1.16	-0.09
i	BP(j)	Nuc	#BP_Win	avgMFE	avgZ	avgED	SumZ	SumZ/#TotalWindows	BPs= 2
nt-14	-	U	14	-	-	-	-	-
14	59	A	9	-30.43	-2.3	13.3	-20.73	-1.48
14	68	A	2	-24.4	-1.16	24.75	-2.31	-0.16
14	NoBP	U	3	-23.13	-0.58	23.65	-1.73	-0.12
i	BP(j)	Nuc	#BP_Win	avgMFE	avgZ	avgED	SumZ	SumZ/#TotalWindows	BPs= 1
nt-15	-	G	15	-	-	-	-	-
15	57	C	9	-30.43	-2.3	13.3	-20.73	-1.38
15	NoBP	G	6	-23.67	-0.8	24.41	-4.83	-0.32
i	BP(j)	Nuc	#BP_Win	avgMFE	avgZ	avgED	SumZ	SumZ/#TotalWindows	BPs= 2
nt-16	-	U	16	-	-	-	-	-
16	56	G	9	-30.43	-2.3	13.3	-20.73	-1.3
16	67	A	2	-24.4	-1.16	24.75	-2.31	-0.14
16	NoBP	U	5	-23.56	-0.69	24.01	-3.45	-0.22
i	BP(j)	Nuc	#BP_Win	avgMFE	avgZ	avgED	SumZ	SumZ/#TotalWindows	BPs= 1
nt-17	-	G	17	-	-	-	-	-
17	NoBP	G	15	-27.77	-1.67	17.54	-25.12	-1.48
17	66	C	2	-24.4	-1.16	24.75	-2.31	-0.14
i	BP(j)	Nuc	#BP_Win	avgMFE	avgZ	avgED	SumZ	SumZ/#TotalWindows	BPs= 1
nt-18	-	A	18	-	-	-	-	-
18	NoBP	A	16	-27.58	-1.65	18.04	-26.39	-1.47
18	65	U	2	-24.4	-1.16	24.75	-2.31	-0.13
i	BP(j)	Nuc	#BP_Win	avgMFE	avgZ	avgED	SumZ	SumZ/#TotalWindows	BPs= 0
nt-19	-	A	19	-	-	-	-	-
19	NoBP	A	19	-27.1	-1.56	19.23	-29.67	-1.56
i	BP(j)	Nuc	#BP_Win	avgMFE	avgZ	avgED	SumZ	SumZ/#TotalWindows	BPs= 1
nt-20	-	U	20	-	-	-	-	-
20	44	A	20	-26.99	-1.55	19.36	-30.93	-1.55
i	BP(j)	Nuc	#BP_Win	avgMFE	avgZ	avgED	SumZ	SumZ/#TotalWindows	BPs= 1
nt-21	-	C	21	-	-	-	-	-
21	43	G	21	-26.84	-1.5	19.38	-31.51	-1.5
i	BP(j)	Nuc	#BP_Win	avgMFE	avgZ	avgED	SumZ	SumZ/#TotalWindows	BPs= 1
nt-22	-	A	22	-	-	-	-	-
22	42	U	22	-26.61	-1.42	20.01	-31.25	-1.42
i	BP(j)	Nuc	#BP_Win	avgMFE	avgZ	avgED	SumZ	SumZ/#TotalWindows	BPs= 1
nt-23	-	G	23	-	-	-	-	-
23	41	U	23	-26.4	-1.34	20.83	-30.89	-1.34
i	BP(j)	Nuc	#BP_Win	avgMFE	avgZ	avgED	SumZ	SumZ/#TotalWindows	BPs= 1
nt-24	-	A	24	-	-	-	-	-
24	40	U	23	-26.4	-1.34	20.83	-30.89	-1.29
24	NoBP	A	1	-22.8	-0.09	26.54	-0.09	0
i	BP(j)	Nuc	#BP_Win	avgMFE	avgZ	avgED	SumZ	SumZ/#TotalWindows	BPs= 1
nt-25	-	C	25	-	-	-	-	-
25	39	G	23	-26.4	-1.34	20.83	-30.89	-1.24
25	NoBP	C	2	-23.85	-0.54	25.71	-1.07	-0.04
i	BP(j)	Nuc	#BP_Win	avgMFE	avgZ	avgED	SumZ	SumZ/#TotalWindows	BPs= 2
nt-26	-	U	26	-	-	-	-	-
26	38	A	23	-26.4	-1.34	20.83	-30.89	-1.19
26	58	A	2	-23.85	-0.54	25.71	-1.07	-0.04
26	NoBP	U	1	-25.9	-0.99	24.2	-0.99	-0.04
i	BP(j)	Nuc	#BP_Win	avgMFE	avgZ	avgED	SumZ	SumZ/#TotalWindows	BPs= 1
nt-27	-	G	27	-	-	-	-	-
27	NoBP	G	25	-26.39	-1.32	21.07	-33.04	-1.22
27	57	C	2	-23.85	-0.54	25.71	-1.07	-0.04
i	BP(j)	Nuc	#BP_Win	avgMFE	avgZ	avgED	SumZ	SumZ/#TotalWindows	BPs= 2
nt-28	-	C	28	-	-	-	-	-
28	37	G	23	-26.4	-1.34	20.83	-30.89	-1.1
28	56	G	2	-23.85	-0.54	25.71	-1.07	-0.04
28	NoBP	C	3	-26.77	-1.23	23.28	-3.7	-0.13
i	BP(j)	Nuc	#BP_Win	avgMFE	avgZ	avgED	SumZ	SumZ/#TotalWindows	BPs= 1
nt-29	-	G	29	-	-	-	-	-
29	36	C	23	-26.4	-1.34	20.83	-30.89	-1.07
29	NoBP	G	6	-25.93	-1.04	23.96	-6.22	-0.21
i	BP(j)	Nuc	#BP_Win	avgMFE	avgZ	avgED	SumZ	SumZ/#TotalWindows	BPs= 1
nt-30	-	A	30	-	-	-	-	-
30	35	U	23	-26.4	-1.34	20.83	-30.89	-1.03
30	NoBP	A	7	-26.17	-1.07	23.58	-7.48	-0.25
i	BP(j)	Nuc	#BP_Win	avgMFE	avgZ	avgED	SumZ	SumZ/#TotalWindows	BPs= 0
nt-31	-	C	31	-	-	-	-	-
31	NoBP	C	31	-26.4	-1.29	21.4	-40.01	-1.29
i	BP(j)	Nuc	#BP_Win	avgMFE	avgZ	avgED	SumZ	SumZ/#TotalWindows	BPs= 0
nt-32	-	A	32	-	-	-	-	-
32	NoBP	A	32	-26.45	-1.31	21.32	-41.86	-1.31
i	BP(j)	Nuc	#BP_Win	avgMFE	avgZ	avgED	SumZ	SumZ/#TotalWindows	BPs= 1
nt-33	-	G	33	-	-	-	-	-
33	NoBP	G	25	-26.19	-1.28	21.22	-31.96	-0.97
33	69	C	8	-27.46	-1.44	21.3	-11.53	-0.35
i	BP(j)	Nuc	#BP_Win	avgMFE	avgZ	avgED	SumZ	SumZ/#TotalWindows	BPs= 2
nt-34	-	U	34	-	-	-	-	-
34	NoBP	U	24	-26.4	-1.36	20.79	-32.66	-0.96
34	50	A	2	-23.85	-0.54	25.71	-1.07	-0.03
34	68	A	8	-27.46	-1.44	21.3	-11.53	-0.34
i	BP(j)	Nuc	#BP_Win	avgMFE	avgZ	avgED	SumZ	SumZ/#TotalWindows	BPs= 3
nt-35	-	U	35	-	-	-	-	-
35	30	A	23	-26.4	-1.34	20.83	-30.89	-0.88
35	49	A	2	-23.85	-0.54	25.71	-1.07	-0.03
35	67	A	8	-27.46	-1.44	21.3	-11.53	-0.33
35	NoBP	U	2	-26.6	-1.59	19.82	-3.18	-0.09
i	BP(j)	Nuc	#BP_Win	avgMFE	avgZ	avgED	SumZ	SumZ/#TotalWindows	BPs= 2
nt-36	-	C	36	-	-	-	-	-
36	29	G	23	-26.4	-1.34	20.83	-30.89	-0.86
36	48	G	2	-23.85	-0.54	25.71	-1.07	-0.03
36	NoBP	C	11	-27.23	-1.49	20.88	-16.37	-0.45
i	BP(j)	Nuc	#BP_Win	avgMFE	avgZ	avgED	SumZ	SumZ/#TotalWindows	BPs= 3
nt-37	-	G	37	-	-	-	-	-
37	28	C	23	-26.4	-1.34	20.83	-30.89	-0.83
37	47	C	2	-23.85	-0.54	25.71	-1.07	-0.03
37	66	C	12	-27.19	-1.51	20.79	-18.07	-0.49
i	BP(j)	Nuc	#BP_Win	avgMFE	avgZ	avgED	SumZ	SumZ/#TotalWindows	BPs= 2
nt-38	-	A	38	-	-	-	-	-
38	26	U	23	-26.4	-1.34	20.83	-30.89	-0.81
38	NoBP	A	3	-24.77	-0.91	23.96	-2.72	-0.07
38	65	U	12	-27.19	-1.51	20.79	-18.07	-0.48
i	BP(j)	Nuc	#BP_Win	avgMFE	avgZ	avgED	SumZ	SumZ/#TotalWindows	BPs= 1
nt-39	-	G	39	-	-	-	-	-
39	25	C	23	-26.4	-1.34	20.83	-30.89	-0.79
39	NoBP	G	16	-26.74	-1.4	21.33	-22.47	-0.58
i	BP(j)	Nuc	#BP_Win	avgMFE	avgZ	avgED	SumZ	SumZ/#TotalWindows	BPs= 1
nt-40	-	U	40	-	-	-	-	-
40	24	A	23	-26.4	-1.34	20.83	-30.89	-0.77
40	NoBP	U	17	-26.76	-1.44	21.07	-24.55	-0.61
i	BP(j)	Nuc	#BP_Win	avgMFE	avgZ	avgED	SumZ	SumZ/#TotalWindows	BPs= 2
nt-41	-	U	41	-	-	-	-	-
41	23	G	23	-26.4	-1.34	20.83	-30.89	-0.75
41	NoBP	U	6	-25.98	-1.36	20.88	-8.19	-0.2
41	62	G	12	-27.19	-1.51	20.79	-18.07	-0.44
i	BP(j)	Nuc	#BP_Win	avgMFE	avgZ	avgED	SumZ	SumZ/#TotalWindows	BPs= 2
nt-42	-	U	42	-	-	-	-	-
42	22	A	22	-26.61	-1.42	20.01	-31.25	-0.74
42	NoBP	U	8	-25.6	-1.25	22.5	-9.99	-0.24
42	61	A	12	-27.19	-1.51	20.79	-18.07	-0.43
i	BP(j)	Nuc	#BP_Win	avgMFE	avgZ	avgED	SumZ	SumZ/#TotalWindows	BPs= 2
nt-43	-	G	43	-	-	-	-	-
43	21	C	21	-26.84	-1.5	19.38	-31.51	-0.73
43	NoBP	G	10	-25.37	-1.2	22.9	-12	-0.28
43	60	C	12	-27.19	-1.51	20.79	-18.07	-0.42
i	BP(j)	Nuc	#BP_Win	avgMFE	avgZ	avgED	SumZ	SumZ/#TotalWindows	BPs= 1
nt-44	-	A	44	-	-	-	-	-
44	20	U	20	-26.99	-1.55	19.36	-30.93	-0.7
44	NoBP	A	24	-26.29	-1.37	21.41	-32.88	-0.75
i	BP(j)	Nuc	#BP_Win	avgMFE	avgZ	avgED	SumZ	SumZ/#TotalWindows	BPs= 1
nt-45	-	A	45	-	-	-	-	-
45	54	U	30	-26.56	-1.49	20	-44.67	-0.99
45	NoBP	A	15	-26.75	-1.41	21.22	-21.19	-0.47
i	BP(j)	Nuc	#BP_Win	avgMFE	avgZ	avgED	SumZ	SumZ/#TotalWindows	BPs= 3
nt-46	-	G	46	-	-	-	-	-
46	53	C	30	-26.56	-1.49	20	-44.67	-0.97
46	NoBP	G	2	-23.85	-0.54	25.71	-1.07	-0.02
46	57	C	12	-27.19	-1.51	20.79	-18.07	-0.39
46	164	C	2	-28.05	-2.59	16.24	-5.18	-0.11
i	BP(j)	Nuc	#BP_Win	avgMFE	avgZ	avgED	SumZ	SumZ/#TotalWindows	BPs= 5
nt-47	-	C	47	-	-	-	-	-
47	52	G	30	-26.56	-1.49	20	-44.67	-0.95
47	37	G	2	-23.85	-0.54	25.71	-1.07	-0.02
47	56	G	12	-27.19	-1.51	20.79	-18.07	-0.38
47	163	G	2	-28.05	-2.59	16.24	-5.18	-0.11
47	165	G	1	-26.8	-1.61	15.3	-1.61	-0.03
i	BP(j)	Nuc	#BP_Win	avgMFE	avgZ	avgED	SumZ	SumZ/#TotalWindows	BPs= 3
nt-48	-	G	48	-	-	-	-	-
48	NoBP	G	43	-26.73	-1.51	20.12	-64.8	-1.35
48	36	C	2	-23.85	-0.54	25.71	-1.07	-0.02
48	162	C	2	-28.05	-2.59	16.24	-5.18	-0.11
48	164	C	1	-26.8	-1.61	15.3	-1.61	-0.03
i	BP(j)	Nuc	#BP_Win	avgMFE	avgZ	avgED	SumZ	SumZ/#TotalWindows	BPs= 1
nt-49	-	A	49	-	-	-	-	-
49	NoBP	A	47	-26.78	-1.56	19.75	-73.51	-1.5
49	35	U	2	-23.85	-0.54	25.71	-1.07	-0.02
i	BP(j)	Nuc	#BP_Win	avgMFE	avgZ	avgED	SumZ	SumZ/#TotalWindows	BPs= 1
nt-50	-	A	50	-	-	-	-	-
50	NoBP	A	48	-26.76	-1.56	19.68	-74.93	-1.5
50	34	U	2	-23.85	-0.54	25.71	-1.07	-0.02
i	BP(j)	Nuc	#BP_Win	avgMFE	avgZ	avgED	SumZ	SumZ/#TotalWindows	BPs= 0
nt-51	-	A	51	-	-	-	-	-
51	NoBP	A	51	-26.64	-1.53	19.88	-77.89	-1.53
i	BP(j)	Nuc	#BP_Win	avgMFE	avgZ	avgED	SumZ	SumZ/#TotalWindows	BPs= 2
nt-52	-	G	52	-	-	-	-	-
52	47	C	30	-26.56	-1.49	20	-44.67	-0.86
52	NoBP	G	17	-26.88	-1.53	20.51	-25.93	-0.5
52	164	C	5	-26.26	-1.79	16.3	-8.94	-0.17
i	BP(j)	Nuc	#BP_Win	avgMFE	avgZ	avgED	SumZ	SumZ/#TotalWindows	BPs= 2
nt-53	-	C	53	-	-	-	-	-
53	46	G	30	-26.56	-1.49	20	-44.67	-0.84
53	NoBP	C	18	-26.86	-1.51	20.24	-27.26	-0.51
53	163	G	5	-26.26	-1.79	16.3	-8.94	-0.17
i	BP(j)	Nuc	#BP_Win	avgMFE	avgZ	avgED	SumZ	SumZ/#TotalWindows	BPs= 2
nt-54	-	U	54	-	-	-	-	-
54	45	A	30	-26.56	-1.49	20	-44.67	-0.83
54	NoBP	U	14	-26.71	-1.37	21.5	-19.14	-0.35
54	158	A	10	-26.8	-1.84	16.01	-18.43	-0.34
i	BP(j)	Nuc	#BP_Win	avgMFE	avgZ	avgED	SumZ	SumZ/#TotalWindows	BPs= 1
nt-55	-	A	55	-	-	-	-	-
55	NoBP	A	37	-26.52	-1.35	21.08	-50.03	-0.91
55	157	U	18	-26.87	-1.86	16.7	-33.42	-0.61
i	BP(j)	Nuc	#BP_Win	avgMFE	avgZ	avgED	SumZ	SumZ/#TotalWindows	BPs= 4
nt-56	-	G	56	-	-	-	-	-
56	16	U	9	-30.43	-2.3	13.3	-20.73	-0.37
56	NoBP	G	14	-23.8	-0.73	25.67	-10.16	-0.18
56	28	C	2	-23.85	-0.54	25.71	-1.07	-0.02
56	47	C	12	-27.19	-1.51	20.79	-18.07	-0.32
56	156	C	19	-26.78	-1.8	16.9	-34.22	-0.61
i	BP(j)	Nuc	#BP_Win	avgMFE	avgZ	avgED	SumZ	SumZ/#TotalWindows	BPs= 4
nt-57	-	C	57	-	-	-	-	-
57	15	G	9	-30.43	-2.3	13.3	-20.73	-0.36
57	NoBP	C	15	-24.04	-0.75	25.04	-11.21	-0.2
57	27	G	2	-23.85	-0.54	25.71	-1.07	-0.02
57	46	G	12	-27.19	-1.51	20.79	-18.07	-0.32
57	155	G	19	-26.78	-1.8	16.9	-34.22	-0.6
i	BP(j)	Nuc	#BP_Win	avgMFE	avgZ	avgED	SumZ	SumZ/#TotalWindows	BPs= 2
nt-58	-	A	58	-	-	-	-	-
58	NoBP	A	37	-26.76	-1.41	20.51	-52.05	-0.9
58	26	U	2	-23.85	-0.54	25.71	-1.07	-0.02
58	154	U	19	-26.78	-1.8	16.9	-34.22	-0.59
i	BP(j)	Nuc	#BP_Win	avgMFE	avgZ	avgED	SumZ	SumZ/#TotalWindows	BPs= 1
nt-59	-	A	59	-	-	-	-	-
59	14	U	9	-30.43	-2.3	13.3	-20.73	-0.35
59	NoBP	A	50	-26.08	-1.39	20.51	-69.56	-1.18
i	BP(j)	Nuc	#BP_Win	avgMFE	avgZ	avgED	SumZ	SumZ/#TotalWindows	BPs= 2
nt-60	-	C	60	-	-	-	-	-
60	13	G	9	-30.43	-2.3	13.3	-20.73	-0.35
60	NoBP	C	39	-25.88	-1.39	20.24	-54.03	-0.9
60	43	G	12	-27.19	-1.51	20.79	-18.07	-0.3
i	BP(j)	Nuc	#BP_Win	avgMFE	avgZ	avgED	SumZ	SumZ/#TotalWindows	BPs= 3
nt-61	-	A	61	-	-	-	-	-
61	12	U	9	-30.43	-2.3	13.3	-20.73	-0.34
61	NoBP	A	35	-25.42	-1.3	20.91	-45.45	-0.75
61	42	U	12	-27.19	-1.51	20.79	-18.07	-0.3
61	157	U	5	-30.28	-2.14	14.23	-10.71	-0.18
i	BP(j)	Nuc	#BP_Win	avgMFE	avgZ	avgED	SumZ	SumZ/#TotalWindows	BPs= 3
nt-62	-	G	62	-	-	-	-	-
62	11	C	9	-30.43	-2.3	13.3	-20.73	-0.33
62	NoBP	G	36	-25.59	-1.32	20.71	-47.37	-0.76
62	41	U	12	-27.19	-1.51	20.79	-18.07	-0.29
62	156	C	5	-30.28	-2.14	14.23	-10.71	-0.17
i	BP(j)	Nuc	#BP_Win	avgMFE	avgZ	avgED	SumZ	SumZ/#TotalWindows	BPs= 1
nt-63	-	U	63	-	-	-	-	-
63	NoBP	U	58	-26.79	-1.54	19.41	-89.39	-1.42
63	155	G	5	-30.28	-2.14	14.23	-10.71	-0.17
i	BP(j)	Nuc	#BP_Win	avgMFE	avgZ	avgED	SumZ	SumZ/#TotalWindows	BPs= 2
nt-64	-	A	64	-	-	-	-	-
64	10	U	8	-31.22	-2.5	12.18	-20	-0.31
64	NoBP	A	51	-26.23	-1.41	20.37	-71.74	-1.12
64	154	U	5	-30.28	-2.14	14.23	-10.71	-0.17
i	BP(j)	Nuc	#BP_Win	avgMFE	avgZ	avgED	SumZ	SumZ/#TotalWindows	BPs= 4
nt-65	-	U	65	-	-	-	-	-
65	9	A	8	-31.22	-2.5	12.18	-20	-0.31
65	18	A	2	-24.4	-1.16	24.75	-2.31	-0.04
65	NoBP	U	38	-26.21	-1.41	19.76	-53.52	-0.82
65	38	A	12	-27.19	-1.51	20.79	-18.07	-0.28
65	153	A	5	-30.28	-2.14	14.23	-10.71	-0.16
i	BP(j)	Nuc	#BP_Win	avgMFE	avgZ	avgED	SumZ	SumZ/#TotalWindows	BPs= 3
nt-66	-	C	66	-	-	-	-	-
66	8	G	8	-31.22	-2.5	12.18	-20	-0.3
66	17	G	2	-24.4	-1.16	24.75	-2.31	-0.04
66	NoBP	C	44	-26.83	-1.52	18.93	-66.69	-1.01
66	37	G	12	-27.19	-1.51	20.79	-18.07	-0.27
i	BP(j)	Nuc	#BP_Win	avgMFE	avgZ	avgED	SumZ	SumZ/#TotalWindows	BPs= 3
nt-67	-	A	67	-	-	-	-	-
67	7	U	7	-31.79	-2.61	12.04	-18.3	-0.27
67	NoBP	A	50	-26.96	-1.55	18.73	-77.28	-1.15
67	16	U	2	-24.4	-1.16	24.75	-2.31	-0.03
67	35	U	8	-27.46	-1.44	21.3	-11.53	-0.17
i	BP(j)	Nuc	#BP_Win	avgMFE	avgZ	avgED	SumZ	SumZ/#TotalWindows	BPs= 3
nt-68	-	A	68	-	-	-	-	-
68	6	U	6	-32.42	-2.74	11.96	-16.41	-0.24
68	NoBP	A	52	-27.1	-1.57	18.47	-81.72	-1.2
68	14	U	2	-24.4	-1.16	24.75	-2.31	-0.03
68	34	U	8	-27.46	-1.44	21.3	-11.53	-0.17
i	BP(j)	Nuc	#BP_Win	avgMFE	avgZ	avgED	SumZ	SumZ/#TotalWindows	BPs= 4
nt-69	-	C	69	-	-	-	-	-
69	5	G	5	-33.18	-2.92	11.87	-14.59	-0.21
69	NoBP	C	53	-27.32	-1.61	18.11	-85.14	-1.23
69	13	G	2	-24.4	-1.16	24.75	-2.31	-0.03
69	132	G	1	-23.2	-0.57	24.93	-0.57	-0.01
69	33	G	8	-27.46	-1.44	21.3	-11.53	-0.17
i	BP(j)	Nuc	#BP_Win	avgMFE	avgZ	avgED	SumZ	SumZ/#TotalWindows	BPs= 2
nt-70	-	A	70	-	-	-	-	-
70	4	U	4	-33.35	-2.83	11.93	-11.32	-0.16
70	NoBP	A	64	-27.45	-1.6	18.43	-102.22	-1.46
70	12	U	2	-24.4	-1.16	24.75	-2.31	-0.03
i	BP(j)	Nuc	#BP_Win	avgMFE	avgZ	avgED	SumZ	SumZ/#TotalWindows	BPs= 4
nt-71	-	G	71	-	-	-	-	-
71	117	C	59	-28.62	-1.85	16.48	-109.32	-1.54
71	11	C	2	-24.4	-1.16	24.75	-2.31	-0.03
71	130	C	3	-23.13	-0.58	23.65	-1.73	-0.02
71	NoBP	G	5	-24.56	-0.98	25.06	-4.9	-0.07
71	141	C	2	-21.7	0.31	36.08	0.62	0.01
i	BP(j)	Nuc	#BP_Win	avgMFE	avgZ	avgED	SumZ	SumZ/#TotalWindows	BPs= 4
nt-72	-	G	72	-	-	-	-	-
72	116	C	59	-28.62	-1.85	16.48	-109.32	-1.52
72	10	U	2	-24.4	-1.16	24.75	-2.31	-0.03
72	129	U	3	-23.13	-0.58	23.65	-1.73	-0.02
72	NoBP	G	6	-26.13	-1.24	23.09	-7.46	-0.1
72	140	C	2	-21.7	0.31	36.08	0.62	0.01
i	BP(j)	Nuc	#BP_Win	avgMFE	avgZ	avgED	SumZ	SumZ/#TotalWindows	BPs= 4
nt-73	-	U	73	-	-	-	-	-
73	115	A	59	-28.62	-1.85	16.48	-109.32	-1.5
73	9	A	1	-24.5	-1.32	25.48	-1.32	-0.02
73	127	A	1	-24.3	-0.99	24.02	-0.99	-0.01
73	128	A	3	-23.13	-0.58	23.65	-1.73	-0.02
73	NoBP	U	9	-26.14	-1.05	24.93	-9.46	-0.13
i	BP(j)	Nuc	#BP_Win	avgMFE	avgZ	avgED	SumZ	SumZ/#TotalWindows	BPs= 3
nt-74	-	U	74	-	-	-	-	-
74	114	A	59	-28.62	-1.85	16.48	-109.32	-1.48
74	126	A	2	-24.4	-1.16	24.75	-2.31	-0.03
74	127	A	3	-23.13	-0.58	23.65	-1.73	-0.02
74	NoBP	U	10	-27.04	-1.17	24.42	-11.66	-0.16
i	BP(j)	Nuc	#BP_Win	avgMFE	avgZ	avgED	SumZ	SumZ/#TotalWindows	BPs= 4
nt-75	-	U	75	-	-	-	-	-
75	113	A	59	-28.62	-1.85	16.48	-109.32	-1.46
75	125	G	2	-24.4	-1.16	24.75	-2.31	-0.03
75	126	A	3	-23.13	-0.58	23.65	-1.73	-0.02
75	NoBP	U	9	-29.49	-1.67	20.89	-15.03	-0.2
75	137	A	2	-21.7	0.31	36.08	0.62	0.01
i	BP(j)	Nuc	#BP_Win	avgMFE	avgZ	avgED	SumZ	SumZ/#TotalWindows	BPs= 4
nt-76	-	U	76	-	-	-	-	-
76	112	A	59	-28.62	-1.85	16.48	-109.32	-1.44
76	124	A	2	-24.4	-1.16	24.75	-2.31	-0.03
76	125	G	3	-23.13	-0.58	23.65	-1.73	-0.02
76	NoBP	U	10	-30.56	-1.82	20.31	-18.23	-0.24
76	136	G	2	-21.7	0.31	36.08	0.62	0.01
i	BP(j)	Nuc	#BP_Win	avgMFE	avgZ	avgED	SumZ	SumZ/#TotalWindows	BPs= 0
nt-77	-	A	77	-	-	-	-	-
77	NoBP	A	77	-28.53	-1.75	17.97	-134.46	-1.75
i	BP(j)	Nuc	#BP_Win	avgMFE	avgZ	avgED	SumZ	SumZ/#TotalWindows	BPs= 4
nt-78	-	U	78	-	-	-	-	-
78	111	A	59	-28.62	-1.85	16.48	-109.32	-1.4
78	122	A	9	-31.11	-1.86	20.17	-16.71	-0.21
78	NoBP	U	4	-22.95	-0.28	30.32	-1.1	-0.01
78	135	G	3	-24.8	-1.06	25.39	-3.18	-0.04
78	112	A	3	-34.73	-2.46	15.6	-7.38	-0.09
i	BP(j)	Nuc	#BP_Win	avgMFE	avgZ	avgED	SumZ	SumZ/#TotalWindows	BPs= 4
nt-79	-	U	79	-	-	-	-	-
79	110	G	59	-28.62	-1.85	16.48	-109.32	-1.38
79	121	A	10	-32.1	-1.98	19.56	-19.75	-0.25
79	134	A	7	-23.74	-0.61	28.21	-4.28	-0.05
79	111	A	3	-34.73	-2.46	15.6	-7.38	-0.09
i	BP(j)	Nuc	#BP_Win	avgMFE	avgZ	avgED	SumZ	SumZ/#TotalWindows	BPs= 3
nt-80	-	U	80	-	-	-	-	-
80	NoBP	U	60	-28.81	-1.88	16.4	-112.55	-1.41
80	120	A	10	-32.1	-1.98	19.56	-19.75	-0.25
80	133	G	7	-23.74	-0.61	28.21	-4.28	-0.05
80	110	G	3	-34.73	-2.46	15.6	-7.38	-0.09
i	BP(j)	Nuc	#BP_Win	avgMFE	avgZ	avgED	SumZ	SumZ/#TotalWindows	BPs= 3
nt-81	-	U	81	-	-	-	-	-
81	108	A	59	-28.62	-1.85	16.48	-109.32	-1.35
81	119	A	10	-32.1	-1.98	19.56	-19.75	-0.24
81	132	G	7	-23.74	-0.61	28.21	-4.28	-0.05
81	NoBP	U	5	-36.96	-2.69	13.41	-13.43	-0.17
i	BP(j)	Nuc	#BP_Win	avgMFE	avgZ	avgED	SumZ	SumZ/#TotalWindows	BPs= 3
nt-82	-	G	82	-	-	-	-	-
82	107	C	59	-28.62	-1.85	16.48	-109.32	-1.33
82	118	C	10	-32.1	-1.98	19.56	-19.75	-0.24
82	131	C	7	-23.74	-0.61	28.21	-4.28	-0.05
82	NoBP	G	6	-37.52	-2.82	12.5	-16.95	-0.21
i	BP(j)	Nuc	#BP_Win	avgMFE	avgZ	avgED	SumZ	SumZ/#TotalWindows	BPs= 4
nt-83	-	G	83	-	-	-	-	-
83	106	U	59	-28.62	-1.85	16.48	-109.32	-1.32
83	117	C	10	-32.1	-1.98	19.56	-19.75	-0.24
83	130	C	7	-23.74	-0.61	28.21	-4.28	-0.05
83	107	C	7	-37.96	-2.89	11.72	-20.22	-0.24
i	BP(j)	Nuc	#BP_Win	avgMFE	avgZ	avgED	SumZ	SumZ/#TotalWindows	BPs= 2
nt-84	-	A	84	-	-	-	-	-
84	NoBP	A	70	-29.28	-1.89	16.81	-132.55	-1.58
84	129	U	7	-23.74	-0.61	28.21	-4.28	-0.05
84	106	U	7	-37.96	-2.89	11.72	-20.22	-0.24
i	BP(j)	Nuc	#BP_Win	avgMFE	avgZ	avgED	SumZ	SumZ/#TotalWindows	BPs= 3
nt-85	-	U	85	-	-	-	-	-
85	NoBP	U	61	-28.99	-1.9	16.27	-115.64	-1.36
85	115	A	10	-32.1	-1.98	19.56	-19.75	-0.23
85	128	A	7	-23.74	-0.61	28.21	-4.28	-0.05
85	105	G	7	-37.96	-2.89	11.72	-20.22	-0.24
i	BP(j)	Nuc	#BP_Win	avgMFE	avgZ	avgED	SumZ	SumZ/#TotalWindows	BPs= 4
nt-86	-	U	86	-	-	-	-	-
86	105	G	59	-28.62	-1.85	16.48	-109.32	-1.27
86	114	A	10	-32.1	-1.98	19.56	-19.75	-0.23
86	127	A	7	-23.74	-0.61	28.21	-4.28	-0.05
86	104	G	7	-37.96	-2.89	11.72	-20.22	-0.24
86	NoBP	U	3	-40.2	-3.24	12.09	-9.72	-0.11
i	BP(j)	Nuc	#BP_Win	avgMFE	avgZ	avgED	SumZ	SumZ/#TotalWindows	BPs= 3
nt-87	-	U	87	-	-	-	-	-
87	104	G	59	-28.62	-1.85	16.48	-109.32	-1.26
87	113	A	10	-32.1	-1.98	19.56	-19.75	-0.23
87	126	A	7	-23.74	-0.61	28.21	-4.28	-0.05
87	NoBP	U	11	-38.86	-3.01	12.36	-33.09	-0.38
i	BP(j)	Nuc	#BP_Win	avgMFE	avgZ	avgED	SumZ	SumZ/#TotalWindows	BPs= 1
nt-88	-	G	88	-	-	-	-	-
88	103	U	88	-30.07	-1.93	17.16	-169.63	-1.93
i	BP(j)	Nuc	#BP_Win	avgMFE	avgZ	avgED	SumZ	SumZ/#TotalWindows	BPs= 1
nt-89	-	G	89	-	-	-	-	-
89	102	C	89	-30.2	-1.94	17.08	-172.49	-1.94
i	BP(j)	Nuc	#BP_Win	avgMFE	avgZ	avgED	SumZ	SumZ/#TotalWindows	BPs= 1
nt-90	-	A	90	-	-	-	-	-
90	101	U	89	-30.2	-1.94	17.08	-172.49	-1.92
90	NoBP	A	1	-41.7	-3.9	15.21	-3.9	-0.04
i	BP(j)	Nuc	#BP_Win	avgMFE	avgZ	avgED	SumZ	SumZ/#TotalWindows	BPs= 1
nt-91	-	A	91	-	-	-	-	-
91	100	U	89	-30.2	-1.94	17.08	-172.49	-1.9
91	NoBP	A	2	-41.7	-3.3	14.92	-6.59	-0.07
i	BP(j)	Nuc	#BP_Win	avgMFE	avgZ	avgED	SumZ	SumZ/#TotalWindows	BPs= 1
nt-92	-	A	92	-	-	-	-	-
92	99	U	89	-30.2	-1.94	17.08	-172.49	-1.87
92	NoBP	A	3	-41.7	-3.12	15.71	-9.37	-0.1
i	BP(j)	Nuc	#BP_Win	avgMFE	avgZ	avgED	SumZ	SumZ/#TotalWindows	BPs= 1
nt-93	-	C	93	-	-	-	-	-
93	98	G	89	-30.2	-1.94	17.08	-172.49	-1.85
93	NoBP	C	4	-41.7	-3.09	17.1	-12.37	-0.13
i	BP(j)	Nuc	#BP_Win	avgMFE	avgZ	avgED	SumZ	SumZ/#TotalWindows	BPs= 1
nt-94	-	G	94	-	-	-	-	-
94	NoBP	G	89	-30.2	-1.94	17.08	-172.49	-1.84
94	208	C	5	-41.74	-3.02	18.37	-15.09	-0.16
i	BP(j)	Nuc	#BP_Win	avgMFE	avgZ	avgED	SumZ	SumZ/#TotalWindows	BPs= 0
nt-95	-	A	95	-	-	-	-	-
95	NoBP	A	95	-30.93	-2	17.18	-190.1	-2
i	BP(j)	Nuc	#BP_Win	avgMFE	avgZ	avgED	SumZ	SumZ/#TotalWindows	BPs= 0
nt-96	-	G	96	-	-	-	-	-
96	NoBP	G	96	-31.06	-2.01	17.11	-192.92	-2.01
i	BP(j)	Nuc	#BP_Win	avgMFE	avgZ	avgED	SumZ	SumZ/#TotalWindows	BPs= 1
nt-97	-	A	97	-	-	-	-	-
97	NoBP	A	92	-30.61	-1.96	16.94	-180.58	-1.86
97	205	U	5	-41.74	-3.02	18.37	-15.09	-0.16
i	BP(j)	Nuc	#BP_Win	avgMFE	avgZ	avgED	SumZ	SumZ/#TotalWindows	BPs= 3
nt-98	-	G	98	-	-	-	-	-
98	93	C	89	-30.2	-1.94	17.08	-172.49	-1.76
98	204	C	5	-41.74	-3.02	18.37	-15.09	-0.15
98	162	C	1	-41.6	-2.52	20.07	-2.52	-0.03
98	NoBP	G	3	-43.23	-2.83	8.92	-8.49	-0.09
i	BP(j)	Nuc	#BP_Win	avgMFE	avgZ	avgED	SumZ	SumZ/#TotalWindows	BPs= 3
nt-99	-	U	99	-	-	-	-	-
99	92	A	89	-30.2	-1.94	17.08	-172.49	-1.74
99	203	G	5	-41.74	-3.02	18.37	-15.09	-0.15
99	161	A	1	-41.6	-2.52	20.07	-2.52	-0.03
99	NoBP	U	4	-43.28	-2.9	8.63	-11.59	-0.12
i	BP(j)	Nuc	#BP_Win	avgMFE	avgZ	avgED	SumZ	SumZ/#TotalWindows	BPs= 3
nt-100	-	U	100	-	-	-	-	-
100	91	A	89	-30.2	-1.94	17.08	-172.49	-1.72
100	202	G	5	-41.74	-3.02	18.37	-15.09	-0.15
100	160	A	1	-41.6	-2.52	20.07	-2.52	-0.03
100	NoBP	U	5	-43.3	-2.9	8.43	-14.48	-0.14
i	BP(j)	Nuc	#BP_Win	avgMFE	avgZ	avgED	SumZ	SumZ/#TotalWindows	BPs= 4
nt-101	-	U	101	-	-	-	-	-
101	90	A	89	-30.2	-1.94	17.08	-172.49	-1.71
101	201	A	5	-41.74	-3.02	18.37	-15.09	-0.15
101	159	A	1	-41.6	-2.52	20.07	-2.52	-0.02
101	215	A	6	-43.28	-2.9	8.45	-17.38	-0.17
i	BP(j)	Nuc	#BP_Win	avgMFE	avgZ	avgED	SumZ	SumZ/#TotalWindows	BPs= 3
nt-102	-	C	102	-	-	-	-	-
102	89	G	89	-30.2	-1.94	17.08	-172.49	-1.69
102	200	G	5	-41.74	-3.02	18.37	-15.09	-0.15
102	NoBP	C	1	-41.6	-2.52	20.07	-2.52	-0.02
102	214	G	7	-43.09	-2.82	9.84	-19.75	-0.19
i	BP(j)	Nuc	#BP_Win	avgMFE	avgZ	avgED	SumZ	SumZ/#TotalWindows	BPs= 4
nt-103	-	U	103	-	-	-	-	-
103	88	G	88	-30.07	-1.93	17.16	-169.63	-1.65
103	NoBP	U	2	-42	-2.88	16.14	-5.76	-0.06
103	199	A	5	-41.74	-3.02	18.37	-15.09	-0.15
103	158	A	1	-41.6	-2.52	20.07	-2.52	-0.02
103	213	G	7	-43.09	-2.82	9.84	-19.75	-0.19
i	BP(j)	Nuc	#BP_Win	avgMFE	avgZ	avgED	SumZ	SumZ/#TotalWindows	BPs= 6
nt-104	-	G	104	-	-	-	-	-
104	87	U	59	-28.62	-1.85	16.48	-109.32	-1.05
104	NoBP	G	10	-32.1	-1.98	19.56	-19.75	-0.19
104	117	C	19	-34.99	-2.17	20.1	-41.28	-0.4
104	86	U	7	-37.96	-2.89	11.72	-20.22	-0.19
104	205	U	1	-41.2	-3.15	17.64	-3.15	-0.03
104	157	U	1	-41.6	-2.52	20.07	-2.52	-0.02
104	212	C	7	-43.09	-2.82	9.84	-19.75	-0.19
i	BP(j)	Nuc	#BP_Win	avgMFE	avgZ	avgED	SumZ	SumZ/#TotalWindows	BPs= 6
nt-105	-	G	105	-	-	-	-	-
105	86	U	59	-28.62	-1.85	16.48	-109.32	-1.04
105	NoBP	G	11	-32.98	-2.02	19.32	-22.22	-0.21
105	116	C	19	-34.99	-2.17	20.1	-41.28	-0.39
105	85	U	7	-37.96	-2.89	11.72	-20.22	-0.19
105	204	C	1	-41.2	-3.15	17.64	-3.15	-0.03
105	156	C	1	-41.6	-2.52	20.07	-2.52	-0.02
105	211	C	7	-43.09	-2.82	9.84	-19.75	-0.19
i	BP(j)	Nuc	#BP_Win	avgMFE	avgZ	avgED	SumZ	SumZ/#TotalWindows	BPs= 5
nt-106	-	U	106	-	-	-	-	-
106	83	G	59	-28.62	-1.85	16.48	-109.32	-1.03
106	NoBP	U	13	-34.35	-2.11	19.53	-27.49	-0.26
106	115	A	19	-34.99	-2.17	20.1	-41.28	-0.39
106	84	A	7	-37.96	-2.89	11.72	-20.22	-0.19
106	203	G	1	-41.2	-3.15	17.64	-3.15	-0.03
106	210	G	7	-43.09	-2.82	9.84	-19.75	-0.19
i	BP(j)	Nuc	#BP_Win	avgMFE	avgZ	avgED	SumZ	SumZ/#TotalWindows	BPs= 4
nt-107	-	C	107	-	-	-	-	-
107	82	G	59	-28.62	-1.85	16.48	-109.32	-1.02
107	NoBP	C	39	-36.33	-2.29	18.2	-89.4	-0.84
107	83	G	7	-37.96	-2.89	11.72	-20.22	-0.19
107	202	G	1	-41.2	-3.15	17.64	-3.15	-0.03
107	155	G	1	-41.6	-2.52	20.07	-2.52	-0.02
i	BP(j)	Nuc	#BP_Win	avgMFE	avgZ	avgED	SumZ	SumZ/#TotalWindows	BPs= 2
nt-108	-	A	108	-	-	-	-	-
108	81	U	59	-28.62	-1.85	16.48	-109.32	-1.01
108	NoBP	A	48	-36.9	-2.42	17.39	-115.94	-1.07
108	154	U	1	-41.6	-2.52	20.07	-2.52	-0.02
i	BP(j)	Nuc	#BP_Win	avgMFE	avgZ	avgED	SumZ	SumZ/#TotalWindows	BPs= 1
nt-109	-	U	109	-	-	-	-	-
109	NoBP	U	108	-32.47	-2.12	16.96	-228.66	-2.1
109	153	A	1	-41.6	-2.52	20.07	-2.52	-0.02
i	BP(j)	Nuc	#BP_Win	avgMFE	avgZ	avgED	SumZ	SumZ/#TotalWindows	BPs= 3
nt-110	-	G	110	-	-	-	-	-
110	79	U	59	-28.62	-1.85	16.48	-109.32	-0.99
110	NoBP	G	47	-37.49	-2.45	17.82	-115.04	-1.05
110	80	U	3	-34.73	-2.46	15.6	-7.38	-0.07
110	152	U	1	-41.6	-2.52	20.07	-2.52	-0.02
i	BP(j)	Nuc	#BP_Win	avgMFE	avgZ	avgED	SumZ	SumZ/#TotalWindows	BPs= 2
nt-111	-	A	111	-	-	-	-	-
111	78	U	59	-28.62	-1.85	16.48	-109.32	-0.98
111	NoBP	A	49	-37.77	-2.48	18.01	-121.64	-1.1
111	79	U	3	-34.73	-2.46	15.6	-7.38	-0.07
i	BP(j)	Nuc	#BP_Win	avgMFE	avgZ	avgED	SumZ	SumZ/#TotalWindows	BPs= 2
nt-112	-	A	112	-	-	-	-	-
112	76	U	59	-28.62	-1.85	16.48	-109.32	-0.98
112	NoBP	A	50	-37.97	-2.49	18.15	-124.45	-1.11
112	78	U	3	-34.73	-2.46	15.6	-7.38	-0.07
i	BP(j)	Nuc	#BP_Win	avgMFE	avgZ	avgED	SumZ	SumZ/#TotalWindows	BPs= 2
nt-113	-	A	113	-	-	-	-	-
113	75	U	59	-28.62	-1.85	16.48	-109.32	-0.97
113	87	U	10	-32.1	-1.98	19.56	-19.75	-0.17
113	NoBP	A	44	-39.3	-2.63	17.82	-115.55	-1.02
i	BP(j)	Nuc	#BP_Win	avgMFE	avgZ	avgED	SumZ	SumZ/#TotalWindows	BPs= 2
nt-114	-	A	114	-	-	-	-	-
114	74	U	59	-28.62	-1.85	16.48	-109.32	-0.96
114	86	U	10	-32.1	-1.98	19.56	-19.75	-0.17
114	NoBP	A	45	-39.48	-2.63	18.03	-118.54	-1.04
i	BP(j)	Nuc	#BP_Win	avgMFE	avgZ	avgED	SumZ	SumZ/#TotalWindows	BPs= 4
nt-115	-	A	115	-	-	-	-	-
115	73	U	59	-28.62	-1.85	16.48	-109.32	-0.95
115	85	U	10	-32.1	-1.98	19.56	-19.75	-0.17
115	106	U	19	-34.99	-2.17	20.1	-41.28	-0.36
115	NoBP	A	20	-41.38	-2.88	13.76	-57.6	-0.5
115	227	U	7	-47.44	-3.29	25.3	-23	-0.2
i	BP(j)	Nuc	#BP_Win	avgMFE	avgZ	avgED	SumZ	SumZ/#TotalWindows	BPs= 5
nt-116	-	C	116	-	-	-	-	-
116	72	G	59	-28.62	-1.85	16.48	-109.32	-0.94
116	NoBP	C	25	-38.03	-2.53	15.03	-63.23	-0.55
116	105	G	19	-34.99	-2.17	20.1	-41.28	-0.36
116	191	G	3	-34.73	-2.46	15.6	-7.38	-0.06
116	226	G	8	-47.21	-3.3	25.29	-26.4	-0.23
116	233	G	2	-47.65	-3.04	22.83	-6.09	-0.05
i	BP(j)	Nuc	#BP_Win	avgMFE	avgZ	avgED	SumZ	SumZ/#TotalWindows	BPs= 6
nt-117	-	C	117	-	-	-	-	-
117	71	G	59	-28.62	-1.85	16.48	-109.32	-0.93
117	83	G	10	-32.1	-1.98	19.56	-19.75	-0.17
117	104	G	19	-34.99	-2.17	20.1	-41.28	-0.35
117	190	G	3	-34.73	-2.46	15.6	-7.38	-0.06
117	NoBP	C	15	-42.31	-2.84	11.9	-42.67	-0.36
117	225	G	9	-46.64	-3.24	24.85	-29.15	-0.25
117	232	G	2	-47.65	-3.04	22.83	-6.09	-0.05
i	BP(j)	Nuc	#BP_Win	avgMFE	avgZ	avgED	SumZ	SumZ/#TotalWindows	BPs= 4
nt-118	-	C	118	-	-	-	-	-
118	NoBP	C	94	-32.31	-2.09	16.45	-196.3	-1.66
118	82	G	10	-32.1	-1.98	19.56	-19.75	-0.17
118	189	G	3	-34.73	-2.46	15.6	-7.38	-0.06
118	224	G	9	-46.64	-3.24	24.85	-29.15	-0.25
118	231	G	2	-47.65	-3.04	22.83	-6.09	-0.05
i	BP(j)	Nuc	#BP_Win	avgMFE	avgZ	avgED	SumZ	SumZ/#TotalWindows	BPs= 4
nt-119	-	A	119	-	-	-	-	-
119	NoBP	A	95	-32.49	-2.1	16.41	-199.61	-1.68
119	81	U	10	-32.1	-1.98	19.56	-19.75	-0.17
119	188	U	3	-34.73	-2.46	15.6	-7.38	-0.06
119	223	U	9	-46.64	-3.24	24.85	-29.15	-0.24
119	230	U	2	-47.65	-3.04	22.83	-6.09	-0.05
i	BP(j)	Nuc	#BP_Win	avgMFE	avgZ	avgED	SumZ	SumZ/#TotalWindows	BPs= 2
nt-120	-	A	120	-	-	-	-	-
120	NoBP	A	107	-34.12	-2.23	17.21	-238.18	-1.98
120	80	U	10	-32.1	-1.98	19.56	-19.75	-0.16
120	187	U	3	-34.73	-2.46	15.6	-7.38	-0.06
i	BP(j)	Nuc	#BP_Win	avgMFE	avgZ	avgED	SumZ	SumZ/#TotalWindows	BPs= 2
nt-121	-	A	120	-	-	-	-	-
121	NoBP	A	107	-34.27	-2.22	17.25	-237.71	-1.98
121	79	U	10	-32.1	-1.98	19.56	-19.75	-0.16
121	186	U	3	-34.73	-2.46	15.6	-7.38	-0.06
i	BP(j)	Nuc	#BP_Win	avgMFE	avgZ	avgED	SumZ	SumZ/#TotalWindows	BPs= 1
nt-122	-	A	120	-	-	-	-	-
122	NoBP	A	111	-34.49	-2.24	17.2	-248.25	-2.07
122	78	U	9	-31.11	-1.86	20.17	-16.71	-0.14
i	BP(j)	Nuc	#BP_Win	avgMFE	avgZ	avgED	SumZ	SumZ/#TotalWindows	BPs= 0
nt-123	-	A	120	-	-	-	-	-
123	NoBP	A	120	-34.39	-2.21	17.4	-265.11	-2.21
i	BP(j)	Nuc	#BP_Win	avgMFE	avgZ	avgED	SumZ	SumZ/#TotalWindows	BPs= 1
nt-124	-	A	120	-	-	-	-	-
124	NoBP	A	118	-34.73	-2.23	17.26	-262.64	-2.19
124	76	U	2	-24.4	-1.16	24.75	-2.31	-0.02
i	BP(j)	Nuc	#BP_Win	avgMFE	avgZ	avgED	SumZ	SumZ/#TotalWindows	BPs= 3
nt-125	-	G	120	-	-	-	-	-
125	NoBP	G	22	-26.43	-1.09	22.64	-24.05	-0.2
125	75	U	2	-24.4	-1.16	24.75	-2.31	-0.02
125	76	U	3	-23.13	-0.58	23.65	-1.73	-0.01
125	149	C	93	-37.29	-2.55	15.74	-236.9	-1.97
i	BP(j)	Nuc	#BP_Win	avgMFE	avgZ	avgED	SumZ	SumZ/#TotalWindows	BPs= 4
nt-126	-	A	120	-	-	-	-	-
126	NoBP	A	15	-29.31	-1.43	19.91	-21.41	-0.18
126	74	U	2	-24.4	-1.16	24.75	-2.31	-0.02
126	75	U	3	-23.13	-0.58	23.65	-1.73	-0.01
126	87	U	7	-23.74	-0.61	28.21	-4.28	-0.04
126	148	U	93	-37.29	-2.55	15.74	-236.9	-1.97
i	BP(j)	Nuc	#BP_Win	avgMFE	avgZ	avgED	SumZ	SumZ/#TotalWindows	BPs= 5
nt-127	-	A	120	-	-	-	-	-
127	NoBP	A	6	-24.92	-0.97	22.75	-5.81	-0.05
127	73	U	1	-24.3	-0.99	24.02	-0.99	-0.01
127	74	U	3	-23.13	-0.58	23.65	-1.73	-0.01
127	86	U	7	-23.74	-0.61	28.21	-4.28	-0.04
127	139	U	2	-24.4	-0.92	20.78	-1.84	-0.02
127	146	U	101	-37.21	-2.51	15.92	-253.38	-2.11
i	BP(j)	Nuc	#BP_Win	avgMFE	avgZ	avgED	SumZ	SumZ/#TotalWindows	BPs= 4
nt-128	-	A	120	-	-	-	-	-
128	NoBP	A	5	-24.12	-0.82	24.64	-4.11	-0.03
128	73	U	3	-23.13	-0.58	23.65	-1.73	-0.01
128	85	U	7	-23.74	-0.61	28.21	-4.28	-0.04
128	138	U	2	-24.4	-0.92	20.78	-1.84	-0.02
128	145	U	103	-37.23	-2.5	15.98	-257.05	-2.14
i	BP(j)	Nuc	#BP_Win	avgMFE	avgZ	avgED	SumZ	SumZ/#TotalWindows	BPs= 4
nt-129	-	U	120	-	-	-	-	-
129	NoBP	U	3	-23.73	-0.6	24.27	-1.81	-0.02
129	72	G	3	-23.13	-0.58	23.65	-1.73	-0.01
129	84	A	7	-23.74	-0.61	28.21	-4.28	-0.04
129	137	A	2	-24.4	-0.92	20.78	-1.84	-0.02
129	144	A	105	-37.25	-2.48	16.02	-260.17	-2.17
i	BP(j)	Nuc	#BP_Win	avgMFE	avgZ	avgED	SumZ	SumZ/#TotalWindows	BPs= 4
nt-130	-	C	120	-	-	-	-	-
130	NoBP	C	1	-24.1	-0.73	22.26	-0.73	-0.01
130	71	G	3	-23.13	-0.58	23.65	-1.73	-0.01
130	83	G	7	-23.74	-0.61	28.21	-4.28	-0.04
130	136	G	2	-24.4	-0.92	20.78	-1.84	-0.02
130	143	G	107	-37.25	-2.46	16.06	-263.03	-2.19
i	BP(j)	Nuc	#BP_Win	avgMFE	avgZ	avgED	SumZ	SumZ/#TotalWindows	BPs= 3
nt-131	-	C	120	-	-	-	-	-
131	NoBP	C	3	-23.13	-0.58	23.65	-1.73	-0.01
131	82	G	7	-23.74	-0.61	28.21	-4.28	-0.04
131	135	G	2	-24.4	-0.92	20.78	-1.84	-0.02
131	142	G	108	-37.35	-2.46	16.09	-265.22	-2.21
i	BP(j)	Nuc	#BP_Win	avgMFE	avgZ	avgED	SumZ	SumZ/#TotalWindows	BPs= 3
nt-132	-	G	120	-	-	-	-	-
132	NoBP	G	3	-23.97	-0.84	21.75	-2.51	-0.02
132	69	C	1	-23.2	-0.57	24.93	-0.57	0
132	81	U	7	-23.74	-0.61	28.21	-4.28	-0.04
132	141	C	109	-37.44	-2.45	16.19	-267.01	-2.23
i	BP(j)	Nuc	#BP_Win	avgMFE	avgZ	avgED	SumZ	SumZ/#TotalWindows	BPs= 2
nt-133	-	G	120	-	-	-	-	-
133	NoBP	G	4	-29.72	-1.01	23.1	-4.05	-0.03
133	80	U	7	-23.74	-0.61	28.21	-4.28	-0.04
133	140	C	109	-37.44	-2.45	16.19	-267.01	-2.23
i	BP(j)	Nuc	#BP_Win	avgMFE	avgZ	avgED	SumZ	SumZ/#TotalWindows	BPs= 3
nt-134	-	A	120	-	-	-	-	-
134	79	U	7	-23.74	-0.61	28.21	-4.28	-0.04
134	NoBP	A	3	-32.83	-1.51	17.45	-4.52	-0.04
134	139	U	109	-37.44	-2.45	16.19	-267.01	-2.23
134	250	U	1	-46.9	-1.64	25.9	-1.64	-0.01
i	BP(j)	Nuc	#BP_Win	avgMFE	avgZ	avgED	SumZ	SumZ/#TotalWindows	BPs= 3
nt-135	-	G	120	-	-	-	-	-
135	NoBP	G	114	-37.28	-2.39	16.51	-272.47	-2.27
135	78	U	3	-24.8	-1.06	25.39	-3.18	-0.03
135	131	C	2	-24.4	-0.92	20.78	-1.84	-0.02
135	249	U	1	-46.9	-1.64	25.9	-1.64	-0.01
i	BP(j)	Nuc	#BP_Win	avgMFE	avgZ	avgED	SumZ	SumZ/#TotalWindows	BPs= 3
nt-136	-	G	120	-	-	-	-	-
136	NoBP	G	115	-37.45	-2.41	16.29	-277.37	-2.31
136	130	C	2	-24.4	-0.92	20.78	-1.84	-0.02
136	76	U	2	-21.7	0.31	36.08	0.62	0.01
136	248	C	1	-46.9	-1.64	25.9	-1.64	-0.01
i	BP(j)	Nuc	#BP_Win	avgMFE	avgZ	avgED	SumZ	SumZ/#TotalWindows	BPs= 3
nt-137	-	A	120	-	-	-	-	-
137	NoBP	A	115	-37.68	-2.43	16.18	-279.15	-2.33
137	129	U	2	-24.4	-0.92	20.78	-1.84	-0.02
137	75	U	2	-21.7	0.31	36.08	0.62	0.01
137	247	U	1	-46.9	-1.64	25.9	-1.64	-0.01
i	BP(j)	Nuc	#BP_Win	avgMFE	avgZ	avgED	SumZ	SumZ/#TotalWindows	BPs= 2
nt-138	-	U	120	-	-	-	-	-
138	NoBP	U	117	-37.63	-2.4	16.42	-280.32	-2.34
138	128	A	2	-24.4	-0.92	20.78	-1.84	-0.02
138	246	G	1	-46.9	-1.64	25.9	-1.64	-0.01
i	BP(j)	Nuc	#BP_Win	avgMFE	avgZ	avgED	SumZ	SumZ/#TotalWindows	BPs= 4
nt-139	-	U	120	-	-	-	-	-
139	127	A	2	-24.4	-0.92	20.78	-1.84	-0.02
139	NoBP	U	3	-31.7	-0.77	30.7	-2.31	-0.02
139	134	A	109	-37.44	-2.45	16.19	-267.01	-2.23
139	215	A	1	-46.9	-1.64	25.9	-1.64	-0.01
139	167	A	5	-50.66	-2.59	11.44	-12.96	-0.11
i	BP(j)	Nuc	#BP_Win	avgMFE	avgZ	avgED	SumZ	SumZ/#TotalWindows	BPs= 4
nt-140	-	C	120	-	-	-	-	-
140	NoBP	C	3	-42.77	-2.14	18.36	-6.43	-0.05
140	72	G	2	-21.7	0.31	36.08	0.62	0.01
140	133	G	109	-37.44	-2.45	16.19	-267.01	-2.23
140	214	G	1	-46.9	-1.64	25.9	-1.64	-0.01
140	166	G	5	-50.66	-2.59	11.44	-12.96	-0.11
i	BP(j)	Nuc	#BP_Win	avgMFE	avgZ	avgED	SumZ	SumZ/#TotalWindows	BPs= 4
nt-141	-	C	120	-	-	-	-	-
141	71	G	2	-21.7	0.31	36.08	0.62	0.01
141	132	G	109	-37.44	-2.45	16.19	-267.01	-2.23
141	213	G	1	-46.9	-1.64	25.9	-1.64	-0.01
141	165	G	5	-50.66	-2.59	11.44	-12.96	-0.11
141	NoBP	C	3	-52.43	-2.89	16.94	-8.68	-0.07
i	BP(j)	Nuc	#BP_Win	avgMFE	avgZ	avgED	SumZ	SumZ/#TotalWindows	BPs= 5
nt-142	-	G	120	-	-	-	-	-
142	NoBP	G	1	-21.7	0.35	38.86	0.35	0
142	131	C	108	-37.35	-2.46	16.09	-265.22	-2.21
142	249	U	1	-47.1	-1.79	27.15	-1.79	-0.01
142	212	C	1	-46.9	-1.64	25.9	-1.64	-0.01
142	164	C	5	-50.66	-2.59	11.44	-12.96	-0.11
142	258	C	4	-52.48	-2.92	16.57	-11.7	-0.1
i	BP(j)	Nuc	#BP_Win	avgMFE	avgZ	avgED	SumZ	SumZ/#TotalWindows	BPs= 4
nt-143	-	G	120	-	-	-	-	-
143	130	C	107	-37.25	-2.46	16.06	-263.03	-2.19
143	NoBP	G	6	-50.25	-2.52	12.63	-15.15	-0.13
143	248	C	1	-47.1	-1.79	27.15	-1.79	-0.01
143	211	C	1	-46.9	-1.64	25.9	-1.64	-0.01
143	257	U	5	-51.88	-2.76	17.34	-13.82	-0.12
i	BP(j)	Nuc	#BP_Win	avgMFE	avgZ	avgED	SumZ	SumZ/#TotalWindows	BPs= 3
nt-144	-	A	120	-	-	-	-	-
144	129	U	105	-37.25	-2.48	16.02	-260.17	-2.17
144	NoBP	A	9	-49.93	-2.44	15.1	-21.95	-0.18
144	247	U	1	-47.1	-1.79	27.15	-1.79	-0.01
144	256	U	5	-51.88	-2.76	17.34	-13.82	-0.12
i	BP(j)	Nuc	#BP_Win	avgMFE	avgZ	avgED	SumZ	SumZ/#TotalWindows	BPs= 5
nt-145	-	U	120	-	-	-	-	-
145	128	A	103	-37.23	-2.5	15.98	-257.05	-2.14
145	NoBP	U	5	-50.48	-2.46	14.8	-12.3	-0.1
145	246	G	1	-47.1	-1.79	27.15	-1.79	-0.01
145	210	G	1	-46.9	-1.64	25.9	-1.64	-0.01
145	161	A	5	-50.66	-2.59	11.44	-12.96	-0.11
145	255	A	5	-51.88	-2.76	17.34	-13.82	-0.12
i	BP(j)	Nuc	#BP_Win	avgMFE	avgZ	avgED	SumZ	SumZ/#TotalWindows	BPs= 5
nt-146	-	U	120	-	-	-	-	-
146	127	A	101	-37.21	-2.51	15.92	-253.38	-2.11
146	NoBP	U	7	-50.87	-2.6	13.34	-18.21	-0.15
146	245	G	1	-47.1	-1.79	27.15	-1.79	-0.01
146	209	A	1	-46.9	-1.64	25.9	-1.64	-0.01
146	160	A	5	-50.66	-2.59	11.44	-12.96	-0.11
146	254	G	5	-51.88	-2.76	17.34	-13.82	-0.12
i	BP(j)	Nuc	#BP_Win	avgMFE	avgZ	avgED	SumZ	SumZ/#TotalWindows	BPs= 3
nt-147	-	G	120	-	-	-	-	-
147	NoBP	G	113	-38.88	-2.54	15.41	-286.87	-2.39
147	244	U	1	-47.1	-1.79	27.15	-1.79	-0.01
147	208	C	1	-46.9	-1.64	25.9	-1.64	-0.01
147	253	C	5	-51.88	-2.76	17.34	-13.82	-0.12
i	BP(j)	Nuc	#BP_Win	avgMFE	avgZ	avgED	SumZ	SumZ/#TotalWindows	BPs= 3
nt-148	-	U	120	-	-	-	-	-
148	NoBP	U	21	-47.61	-2.59	13.62	-54.35	-0.45
148	126	A	93	-37.29	-2.55	15.74	-236.9	-1.97
148	243	A	1	-47.1	-1.79	27.15	-1.79	-0.01
148	252	G	5	-51.88	-2.76	17.34	-13.82	-0.12
i	BP(j)	Nuc	#BP_Win	avgMFE	avgZ	avgED	SumZ	SumZ/#TotalWindows	BPs= 4
nt-149	-	C	120	-	-	-	-	-
149	NoBP	C	20	-49.7	-2.72	12.75	-54.49	-0.45
149	125	G	93	-37.29	-2.55	15.74	-236.9	-1.97
149	189	G	1	-33.7	-1.79	13.72	-1.79	-0.01
149	242	G	1	-47.1	-1.79	27.15	-1.79	-0.01
149	251	G	5	-51.88	-2.76	17.34	-13.82	-0.12
i	BP(j)	Nuc	#BP_Win	avgMFE	avgZ	avgED	SumZ	SumZ/#TotalWindows	BPs= 2
nt-150	-	A	120	-	-	-	-	-
150	NoBP	A	114	-39.8	-2.59	15.17	-295.39	-2.46
150	188	U	1	-33.7	-1.79	13.72	-1.79	-0.01
150	250	U	5	-51.88	-2.76	17.34	-13.82	-0.12
i	BP(j)	Nuc	#BP_Win	avgMFE	avgZ	avgED	SumZ	SumZ/#TotalWindows	BPs= 1
nt-151	-	A	120	-	-	-	-	-
151	NoBP	A	119	-40.54	-2.61	15.14	-311.05	-2.59
151	187	U	1	-33.7	-1.79	13.72	-1.79	-0.01
i	BP(j)	Nuc	#BP_Win	avgMFE	avgZ	avgED	SumZ	SumZ/#TotalWindows	BPs= 1
nt-152	-	U	120	-	-	-	-	-
152	NoBP	U	119	-40.71	-2.62	14.98	-312.27	-2.6
152	110	G	1	-41.6	-2.52	20.07	-2.52	-0.02
i	BP(j)	Nuc	#BP_Win	avgMFE	avgZ	avgED	SumZ	SumZ/#TotalWindows	BPs= 2
nt-153	-	A	120	-	-	-	-	-
153	NoBP	A	114	-41.41	-2.67	14.9	-304.16	-2.53
153	65	U	5	-30.28	-2.14	14.23	-10.71	-0.09
153	109	U	1	-41.6	-2.52	20.07	-2.52	-0.02
i	BP(j)	Nuc	#BP_Win	avgMFE	avgZ	avgED	SumZ	SumZ/#TotalWindows	BPs= 3
nt-154	-	U	120	-	-	-	-	-
154	NoBP	U	95	-44.65	-2.86	14.36	-271.87	-2.27
154	58	A	19	-26.78	-1.8	16.9	-34.22	-0.29
154	64	A	5	-30.28	-2.14	14.23	-10.71	-0.09
154	108	A	1	-41.6	-2.52	20.07	-2.52	-0.02
i	BP(j)	Nuc	#BP_Win	avgMFE	avgZ	avgED	SumZ	SumZ/#TotalWindows	BPs= 7
nt-155	-	G	120	-	-	-	-	-
155	NoBP	G	65	-47.14	-2.99	14.79	-194.54	-1.62
155	57	C	19	-26.78	-1.8	16.9	-34.22	-0.29
155	63	U	5	-30.28	-2.14	14.23	-10.71	-0.09
155	182	C	12	-33.69	-2.35	12.63	-28.14	-0.23
155	204	C	1	-40.6	-3.4	16.2	-3.4	-0.03
155	164	C	10	-43.34	-2.74	11.37	-27.44	-0.23
155	107	C	1	-41.6	-2.52	20.07	-2.52	-0.02
155	222	C	7	-46.93	-2.83	15.37	-19.84	-0.17
i	BP(j)	Nuc	#BP_Win	avgMFE	avgZ	avgED	SumZ	SumZ/#TotalWindows	BPs= 7
nt-156	-	C	120	-	-	-	-	-
156	NoBP	C	65	-47.59	-3.02	14.57	-196.23	-1.64
156	56	G	19	-26.78	-1.8	16.9	-34.22	-0.29
156	62	G	5	-30.28	-2.14	14.23	-10.71	-0.09
156	181	G	12	-33.69	-2.35	12.63	-28.14	-0.23
156	203	G	1	-40.6	-3.4	16.2	-3.4	-0.03
156	163	G	10	-43.34	-2.74	11.37	-27.44	-0.23
156	105	G	1	-41.6	-2.52	20.07	-2.52	-0.02
156	221	G	7	-46.93	-2.83	15.37	-19.84	-0.17
i	BP(j)	Nuc	#BP_Win	avgMFE	avgZ	avgED	SumZ	SumZ/#TotalWindows	BPs= 5
nt-157	-	U	120	-	-	-	-	-
157	55	A	18	-26.87	-1.86	16.7	-33.42	-0.28
157	NoBP	U	83	-47.11	-2.97	14.16	-246.47	-2.05
157	61	A	5	-30.28	-2.14	14.23	-10.71	-0.09
157	180	A	12	-33.69	-2.35	12.63	-28.14	-0.23
157	202	G	1	-40.6	-3.4	16.2	-3.4	-0.03
157	104	G	1	-41.6	-2.52	20.07	-2.52	-0.02
i	BP(j)	Nuc	#BP_Win	avgMFE	avgZ	avgED	SumZ	SumZ/#TotalWindows	BPs= 2
nt-158	-	A	120	-	-	-	-	-
158	NoBP	A	109	-43.59	-2.81	14.13	-305.86	-2.55
158	54	U	10	-26.8	-1.84	16.01	-18.43	-0.15
158	103	U	1	-41.6	-2.52	20.07	-2.52	-0.02
i	BP(j)	Nuc	#BP_Win	avgMFE	avgZ	avgED	SumZ	SumZ/#TotalWindows	BPs= 1
nt-159	-	A	120	-	-	-	-	-
159	NoBP	A	119	-42.42	-2.74	14.17	-325.67	-2.71
159	101	U	1	-41.6	-2.52	20.07	-2.52	-0.02
i	BP(j)	Nuc	#BP_Win	avgMFE	avgZ	avgED	SumZ	SumZ/#TotalWindows	BPs= 2
nt-160	-	A	120	-	-	-	-	-
160	NoBP	A	114	-42.31	-2.75	14.2	-313.8	-2.62
160	100	U	1	-41.6	-2.52	20.07	-2.52	-0.02
160	146	U	5	-50.66	-2.59	11.44	-12.96	-0.11
i	BP(j)	Nuc	#BP_Win	avgMFE	avgZ	avgED	SumZ	SumZ/#TotalWindows	BPs= 3
nt-161	-	A	120	-	-	-	-	-
161	NoBP	A	45	-39.61	-2.39	14.27	-107.54	-0.9
161	178	U	69	-44.49	-3.01	14.02	-207.42	-1.73
161	99	U	1	-41.6	-2.52	20.07	-2.52	-0.02
161	145	U	5	-50.66	-2.59	11.44	-12.96	-0.11
i	BP(j)	Nuc	#BP_Win	avgMFE	avgZ	avgED	SumZ	SumZ/#TotalWindows	BPs= 3
nt-162	-	C	120	-	-	-	-	-
162	NoBP	C	46	-41.8	-2.42	13.85	-111.13	-0.93
162	48	G	2	-28.05	-2.59	16.24	-5.18	-0.04
162	177	G	71	-44.41	-2.98	14.03	-211.66	-1.76
162	98	G	1	-41.6	-2.52	20.07	-2.52	-0.02
i	BP(j)	Nuc	#BP_Win	avgMFE	avgZ	avgED	SumZ	SumZ/#TotalWindows	BPs= 5
nt-163	-	G	120	-	-	-	-	-
163	NoBP	G	27	-46.87	-2.59	14.06	-70.03	-0.58
163	47	C	2	-28.05	-2.59	16.24	-5.18	-0.04
163	53	C	5	-26.26	-1.79	16.3	-8.94	-0.07
163	172	C	4	-33.25	-1.66	16.3	-6.66	-0.06
163	176	U	72	-44.17	-2.95	14.06	-212.71	-1.77
163	156	C	10	-43.34	-2.74	11.37	-27.44	-0.23
i	BP(j)	Nuc	#BP_Win	avgMFE	avgZ	avgED	SumZ	SumZ/#TotalWindows	BPs= 8
nt-164	-	C	120	-	-	-	-	-
164	46	G	2	-28.05	-2.59	16.24	-5.18	-0.04
164	48	G	1	-26.8	-1.61	15.3	-1.61	-0.01
164	52	G	5	-26.26	-1.79	16.3	-8.94	-0.07
164	171	G	4	-33.25	-1.66	16.3	-6.66	-0.06
164	175	G	73	-43.91	-2.92	14.15	-213.51	-1.78
164	155	G	10	-43.34	-2.74	11.37	-27.44	-0.23
164	213	G	19	-49.1	-2.76	14.26	-52.43	-0.44
164	142	G	5	-50.66	-2.59	11.44	-12.96	-0.11
164	NoBP	C	1	-52.7	-3.81	11.78	-3.81	-0.03
i	BP(j)	Nuc	#BP_Win	avgMFE	avgZ	avgED	SumZ	SumZ/#TotalWindows	BPs= 4
nt-165	-	G	120	-	-	-	-	-
165	NoBP	G	22	-37.81	-2.42	13.58	-53.19	-0.44
165	47	C	1	-26.8	-1.61	15.3	-1.61	-0.01
165	174	C	73	-43.91	-2.92	14.15	-213.51	-1.78
165	212	C	19	-49.1	-2.76	14.26	-52.43	-0.44
165	141	C	5	-50.66	-2.59	11.44	-12.96	-0.11
i	BP(j)	Nuc	#BP_Win	avgMFE	avgZ	avgED	SumZ	SumZ/#TotalWindows	BPs= 4
nt-166	-	G	120	-	-	-	-	-
166	NoBP	G	22	-37.72	-2.35	13.6	-51.67	-0.43
166	173	C	73	-43.91	-2.92	14.15	-213.51	-1.78
166	211	C	19	-49.1	-2.76	14.26	-52.43	-0.44
166	140	C	5	-50.66	-2.59	11.44	-12.96	-0.11
166	284	C	1	-53.1	-3.15	11.73	-3.15	-0.03
i	BP(j)	Nuc	#BP_Win	avgMFE	avgZ	avgED	SumZ	SumZ/#TotalWindows	BPs= 2
nt-167	-	A	120	-	-	-	-	-
167	NoBP	A	114	-43.81	-2.8	14.02	-319.41	-2.66
167	139	U	5	-50.66	-2.59	11.44	-12.96	-0.11
167	283	U	1	-53.1	-3.15	11.73	-3.15	-0.03
i	BP(j)	Nuc	#BP_Win	avgMFE	avgZ	avgED	SumZ	SumZ/#TotalWindows	BPs= 1
nt-168	-	G	120	-	-	-	-	-
168	NoBP	G	86	-43.11	-2.84	14.2	-244.3	-2.04
168	207	C	34	-47.64	-2.73	12.99	-92.83	-0.77
i	BP(j)	Nuc	#BP_Win	avgMFE	avgZ	avgED	SumZ	SumZ/#TotalWindows	BPs= 1
nt-169	-	U	120	-	-	-	-	-
169	NoBP	U	86	-43.42	-2.85	14.13	-245.27	-2.04
169	206	G	34	-47.64	-2.73	12.99	-92.83	-0.77
i	BP(j)	Nuc	#BP_Win	avgMFE	avgZ	avgED	SumZ	SumZ/#TotalWindows	BPs= 1
nt-170	-	A	120	-	-	-	-	-
170	NoBP	A	86	-43.73	-2.87	14.07	-247.03	-2.06
170	205	U	34	-47.64	-2.73	12.99	-92.83	-0.77
i	BP(j)	Nuc	#BP_Win	avgMFE	avgZ	avgED	SumZ	SumZ/#TotalWindows	BPs= 3
nt-171	-	G	120	-	-	-	-	-
171	NoBP	G	74	-43.68	-2.91	14.18	-215.16	-1.79
171	164	C	4	-33.25	-1.66	16.3	-6.66	-0.06
171	204	C	34	-47.64	-2.73	12.99	-92.83	-0.77
171	280	C	8	-52.78	-3.33	11.26	-26.62	-0.22
i	BP(j)	Nuc	#BP_Win	avgMFE	avgZ	avgED	SumZ	SumZ/#TotalWindows	BPs= 3
nt-172	-	C	120	-	-	-	-	-
172	163	G	4	-33.25	-1.66	16.3	-6.66	-0.06
172	NoBP	C	74	-44.03	-2.93	14.13	-216.81	-1.81
172	203	G	34	-47.64	-2.73	12.99	-92.83	-0.77
172	279	G	8	-52.78	-3.33	11.26	-26.62	-0.22
i	BP(j)	Nuc	#BP_Win	avgMFE	avgZ	avgED	SumZ	SumZ/#TotalWindows	BPs= 4
nt-173	-	C	120	-	-	-	-	-
173	NoBP	C	4	-39.45	-2.21	14.98	-8.83	-0.07
173	166	G	73	-43.91	-2.92	14.15	-213.51	-1.78
173	202	G	34	-47.64	-2.73	12.99	-92.83	-0.77
173	279	G	1	-53.4	-2.75	14.96	-2.75	-0.02
173	278	G	8	-52.78	-3.33	11.26	-26.62	-0.22
i	BP(j)	Nuc	#BP_Win	avgMFE	avgZ	avgED	SumZ	SumZ/#TotalWindows	BPs= 2
nt-174	-	C	120	-	-	-	-	-
174	NoBP	C	46	-48.37	-2.83	12.76	-130.28	-1.09
174	165	G	73	-43.91	-2.92	14.15	-213.51	-1.78
174	278	G	1	-53.4	-2.75	14.96	-2.75	-0.02
i	BP(j)	Nuc	#BP_Win	avgMFE	avgZ	avgED	SumZ	SumZ/#TotalWindows	BPs= 2
nt-175	-	G	120	-	-	-	-	-
175	164	C	73	-43.91	-2.92	14.15	-213.51	-1.78
175	NoBP	G	38	-48.14	-2.77	12.87	-105.12	-0.88
175	277	C	9	-52.84	-3.26	11.67	-29.37	-0.24
i	BP(j)	Nuc	#BP_Win	avgMFE	avgZ	avgED	SumZ	SumZ/#TotalWindows	BPs= 3
nt-176	-	U	120	-	-	-	-	-
176	163	G	72	-44.17	-2.95	14.06	-212.71	-1.77
176	199	A	34	-47.64	-2.73	12.99	-92.83	-0.77
176	276	A	9	-52.84	-3.26	11.67	-29.37	-0.24
176	NoBP	U	5	-52.48	-3.18	11.66	-15.88	-0.13
i	BP(j)	Nuc	#BP_Win	avgMFE	avgZ	avgED	SumZ	SumZ/#TotalWindows	BPs= 4
nt-177	-	G	120	-	-	-	-	-
177	162	C	71	-44.41	-2.98	14.03	-211.66	-1.76
177	NoBP	G	34	-47.64	-2.73	12.99	-92.83	-0.77
177	275	C	9	-52.84	-3.26	11.67	-29.37	-0.24
177	277	C	4	-52.4	-3.07	11.84	-12.29	-0.1
177	294	C	2	-52.8	-3.28	10.99	-6.57	-0.05
i	BP(j)	Nuc	#BP_Win	avgMFE	avgZ	avgED	SumZ	SumZ/#TotalWindows	BPs= 3
nt-178	-	U	120	-	-	-	-	-
178	161	A	69	-44.49	-3.01	14.02	-207.42	-1.73
178	NoBP	U	45	-48.91	-2.82	12.64	-127.03	-1.06
178	276	A	4	-52.4	-3.07	11.84	-12.29	-0.1
178	293	A	2	-52.8	-3.28	10.99	-6.57	-0.05
i	BP(j)	Nuc	#BP_Win	avgMFE	avgZ	avgED	SumZ	SumZ/#TotalWindows	BPs= 3
nt-179	-	G	120	-	-	-	-	-
179	NoBP	G	17	-33.99	-2.39	13.12	-40.68	-0.34
179	196	U	97	-48.59	-3.03	13.48	-293.69	-2.45
179	275	C	4	-52.4	-3.07	11.84	-12.29	-0.1
179	292	C	2	-52.8	-3.28	10.99	-6.57	-0.05
i	BP(j)	Nuc	#BP_Win	avgMFE	avgZ	avgED	SumZ	SumZ/#TotalWindows	BPs= 4
nt-180	-	A	120	-	-	-	-	-
180	NoBP	A	4	-37.95	-2.47	13.79	-9.88	-0.08
180	157	U	12	-33.69	-2.35	12.63	-28.14	-0.23
180	195	U	98	-48.51	-3.03	13.5	-296.89	-2.47
180	274	U	4	-52.4	-3.07	11.84	-12.29	-0.1
180	291	U	2	-52.8	-3.28	10.99	-6.57	-0.05
i	BP(j)	Nuc	#BP_Win	avgMFE	avgZ	avgED	SumZ	SumZ/#TotalWindows	BPs= 2
nt-181	-	G	120	-	-	-	-	-
181	NoBP	G	1	-31.4	-1.92	13.41	-1.92	-0.02
181	156	C	12	-33.69	-2.35	12.63	-28.14	-0.23
181	194	C	107	-48.69	-3.03	13.35	-324.66	-2.71
i	BP(j)	Nuc	#BP_Win	avgMFE	avgZ	avgED	SumZ	SumZ/#TotalWindows	BPs= 2
nt-182	-	C	120	-	-	-	-	-
182	155	G	12	-33.69	-2.35	12.63	-28.14	-0.23
182	193	G	108	-48.69	-3.03	13.41	-327.22	-2.73
i	BP(j)	Nuc	#BP_Win	avgMFE	avgZ	avgED	SumZ	SumZ/#TotalWindows	BPs= 1
nt-183	-	C	120	-	-	-	-	-
183	NoBP	C	11	-33.79	-2.27	12.77	-24.92	-0.21
183	192	G	109	-48.69	-3.02	13.48	-329.34	-2.74
i	BP(j)	Nuc	#BP_Win	avgMFE	avgZ	avgED	SumZ	SumZ/#TotalWindows	BPs= 1
nt-184	-	C	120	-	-	-	-	-
184	NoBP	C	10	-33.83	-2.26	12.99	-22.57	-0.19
184	191	G	110	-48.67	-3.02	13.54	-331.68	-2.76
i	BP(j)	Nuc	#BP_Win	avgMFE	avgZ	avgED	SumZ	SumZ/#TotalWindows	BPs= 1
nt-185	-	C	120	-	-	-	-	-
185	NoBP	C	10	-35.13	-2.29	14.12	-22.86	-0.19
185	190	G	110	-48.67	-3.02	13.54	-331.68	-2.76
i	BP(j)	Nuc	#BP_Win	avgMFE	avgZ	avgED	SumZ	SumZ/#TotalWindows	BPs= 1
nt-186	-	U	120	-	-	-	-	-
186	NoBP	U	117	-47.98	-2.96	13.63	-346.7	-2.89
186	121	A	3	-34.73	-2.46	15.6	-7.38	-0.06
i	BP(j)	Nuc	#BP_Win	avgMFE	avgZ	avgED	SumZ	SumZ/#TotalWindows	BPs= 2
nt-187	-	U	120	-	-	-	-	-
187	NoBP	U	116	-48.22	-2.97	13.72	-344.72	-2.87
187	151	A	1	-33.7	-1.79	13.72	-1.79	-0.01
187	120	A	3	-34.73	-2.46	15.6	-7.38	-0.06
i	BP(j)	Nuc	#BP_Win	avgMFE	avgZ	avgED	SumZ	SumZ/#TotalWindows	BPs= 3
nt-188	-	U	120	-	-	-	-	-
188	NoBP	U	112	-48.4	-3	13.51	-335.56	-2.8
188	150	A	1	-33.7	-1.79	13.72	-1.79	-0.01
188	119	A	3	-34.73	-2.46	15.6	-7.38	-0.06
188	209	A	4	-46.35	-2.24	22.42	-8.94	-0.07
i	BP(j)	Nuc	#BP_Win	avgMFE	avgZ	avgED	SumZ	SumZ/#TotalWindows	BPs= 3
nt-189	-	G	120	-	-	-	-	-
189	NoBP	G	112	-48.51	-3	13.62	-335.63	-2.8
189	149	C	1	-33.7	-1.79	13.72	-1.79	-0.01
189	118	C	3	-34.73	-2.46	15.6	-7.38	-0.06
189	208	C	4	-46.35	-2.24	22.42	-8.94	-0.07
i	BP(j)	Nuc	#BP_Win	avgMFE	avgZ	avgED	SumZ	SumZ/#TotalWindows	BPs= 3
nt-190	-	G	120	-	-	-	-	-
190	NoBP	G	3	-41.77	-2.36	18.38	-7.08	-0.06
190	117	C	3	-34.73	-2.46	15.6	-7.38	-0.06
190	185	C	110	-48.67	-3.02	13.54	-331.68	-2.76
190	207	C	4	-46.35	-2.24	22.42	-8.94	-0.07
i	BP(j)	Nuc	#BP_Win	avgMFE	avgZ	avgED	SumZ	SumZ/#TotalWindows	BPs= 2
nt-191	-	G	120	-	-	-	-	-
191	116	C	3	-34.73	-2.46	15.6	-7.38	-0.06
191	184	C	110	-48.67	-3.02	13.54	-331.68	-2.76
191	NoBP	G	7	-46.11	-2.43	20.22	-16.99	-0.14
i	BP(j)	Nuc	#BP_Win	avgMFE	avgZ	avgED	SumZ	SumZ/#TotalWindows	BPs= 2
nt-192	-	G	120	-	-	-	-	-
192	NoBP	G	7	-42.87	-2.64	16.12	-18.47	-0.15
192	183	C	109	-48.69	-3.02	13.48	-329.34	-2.74
192	205	U	4	-46.35	-2.24	22.42	-8.94	-0.07
i	BP(j)	Nuc	#BP_Win	avgMFE	avgZ	avgED	SumZ	SumZ/#TotalWindows	BPs= 2
nt-193	-	G	120	-	-	-	-	-
193	NoBP	G	8	-44.91	-2.58	15.94	-20.61	-0.17
193	182	C	108	-48.69	-3.03	13.41	-327.22	-2.73
193	204	C	4	-46.35	-2.24	22.42	-8.94	-0.07
i	BP(j)	Nuc	#BP_Win	avgMFE	avgZ	avgED	SumZ	SumZ/#TotalWindows	BPs= 3
nt-194	-	C	120	-	-	-	-	-
194	181	G	107	-48.69	-3.03	13.35	-324.66	-2.71
194	271	G	1	-49.2	-2.56	20.17	-2.56	-0.02
194	NoBP	C	8	-46.25	-2.68	14.47	-21.48	-0.18
194	203	G	4	-46.35	-2.24	22.42	-8.94	-0.07
i	BP(j)	Nuc	#BP_Win	avgMFE	avgZ	avgED	SumZ	SumZ/#TotalWindows	BPs= 3
nt-195	-	U	120	-	-	-	-	-
195	180	A	98	-48.51	-3.03	13.5	-296.89	-2.47
195	270	A	9	-51.86	-3.06	12.16	-27.58	-0.23
195	NoBP	U	9	-46.2	-2.72	13.82	-24.46	-0.2
195	202	G	4	-46.35	-2.24	22.42	-8.94	-0.07
i	BP(j)	Nuc	#BP_Win	avgMFE	avgZ	avgED	SumZ	SumZ/#TotalWindows	BPs= 3
nt-196	-	U	120	-	-	-	-	-
196	179	G	97	-48.59	-3.03	13.48	-293.69	-2.45
196	269	G	9	-51.86	-3.06	12.16	-27.58	-0.23
196	NoBP	U	10	-46.16	-2.7	13.31	-26.96	-0.22
196	201	A	4	-46.35	-2.24	22.42	-8.94	-0.07
i	BP(j)	Nuc	#BP_Win	avgMFE	avgZ	avgED	SumZ	SumZ/#TotalWindows	BPs= 2
nt-197	-	G	120	-	-	-	-	-
197	NoBP	G	65	-46.71	-2.85	14.23	-184.95	-1.54
197	219	C	10	-46.15	-3.21	24.59	-32.05	-0.27
197	268	U	45	-51.86	-3.09	10.36	-139.05	-1.16
i	BP(j)	Nuc	#BP_Win	avgMFE	avgZ	avgED	SumZ	SumZ/#TotalWindows	BPs= 2
nt-198	-	A	120	-	-	-	-	-
198	NoBP	A	63	-46.67	-2.82	14.36	-177.43	-1.48
198	218	U	10	-46.15	-3.21	24.59	-32.05	-0.27
198	267	U	47	-51.76	-3.08	10.27	-144.94	-1.21
i	BP(j)	Nuc	#BP_Win	avgMFE	avgZ	avgED	SumZ	SumZ/#TotalWindows	BPs= 4
nt-199	-	A	120	-	-	-	-	-
199	NoBP	A	23	-46.13	-2.81	15.78	-64.54	-0.54
199	176	U	34	-47.64	-2.73	12.99	-92.83	-0.77
199	103	U	5	-41.74	-3.02	18.37	-15.09	-0.13
199	217	U	10	-46.15	-3.21	24.59	-32.05	-0.27
199	266	U	48	-51.8	-3.09	10.18	-148.42	-1.24
i	BP(j)	Nuc	#BP_Win	avgMFE	avgZ	avgED	SumZ	SumZ/#TotalWindows	BPs= 3
nt-200	-	G	120	-	-	-	-	-
200	NoBP	G	54	-47.11	-2.77	14.36	-149.36	-1.24
200	102	C	5	-41.74	-3.02	18.37	-15.09	-0.13
200	216	C	10	-46.15	-3.21	24.59	-32.05	-0.27
200	265	U	51	-51.49	-3.04	10.23	-155.02	-1.29
i	BP(j)	Nuc	#BP_Win	avgMFE	avgZ	avgED	SumZ	SumZ/#TotalWindows	BPs= 3
nt-201	-	A	120	-	-	-	-	-
201	NoBP	A	58	-47.04	-2.88	15.74	-166.84	-1.39
201	101	U	5	-41.74	-3.02	18.37	-15.09	-0.13
201	264	U	53	-51.32	-3.02	10.32	-160.16	-1.33
201	196	U	4	-46.35	-2.24	22.42	-8.94	-0.07
i	BP(j)	Nuc	#BP_Win	avgMFE	avgZ	avgED	SumZ	SumZ/#TotalWindows	BPs= 8
nt-202	-	G	120	-	-	-	-	-
202	NoBP	G	3	-40.2	-3.2	9.05	-9.59	-0.08
202	157	U	1	-40.6	-3.4	16.2	-3.4	-0.03
202	107	C	1	-41.2	-3.15	17.64	-3.15	-0.03
202	173	C	34	-47.64	-2.73	12.99	-92.83	-0.77
202	100	U	5	-41.74	-3.02	18.37	-15.09	-0.13
202	212	C	15	-48.06	-3.06	22.17	-45.87	-0.38
202	228	C	2	-47.65	-3.04	22.83	-6.09	-0.05
202	263	C	55	-51.18	-3	10.66	-164.75	-1.37
202	195	U	4	-46.35	-2.24	22.42	-8.94	-0.07
i	BP(j)	Nuc	#BP_Win	avgMFE	avgZ	avgED	SumZ	SumZ/#TotalWindows	BPs= 8
nt-203	-	G	120	-	-	-	-	-
203	NoBP	G	2	-40	-3.16	10.03	-6.32	-0.05
203	156	C	1	-40.6	-3.4	16.2	-3.4	-0.03
203	106	U	1	-41.2	-3.15	17.64	-3.15	-0.03
203	172	C	34	-47.64	-2.73	12.99	-92.83	-0.77
203	99	U	5	-41.74	-3.02	18.37	-15.09	-0.13
203	211	C	15	-48.06	-3.06	22.17	-45.87	-0.38
203	227	U	2	-47.65	-3.04	22.83	-6.09	-0.05
203	262	C	56	-51.04	-2.98	10.75	-166.77	-1.39
203	194	C	4	-46.35	-2.24	22.42	-8.94	-0.07
i	BP(j)	Nuc	#BP_Win	avgMFE	avgZ	avgED	SumZ	SumZ/#TotalWindows	BPs= 8
nt-204	-	C	120	-	-	-	-	-
204	NoBP	C	2	-42.15	-2.62	13.82	-5.24	-0.04
204	155	G	1	-40.6	-3.4	16.2	-3.4	-0.03
204	105	G	1	-41.2	-3.15	17.64	-3.15	-0.03
204	171	G	34	-47.64	-2.73	12.99	-92.83	-0.77
204	98	G	5	-41.74	-3.02	18.37	-15.09	-0.13
204	210	G	15	-48.06	-3.06	22.17	-45.87	-0.38
204	226	G	2	-47.65	-3.04	22.83	-6.09	-0.05
204	261	G	56	-51.04	-2.98	10.75	-166.77	-1.39
204	193	G	4	-46.35	-2.24	22.42	-8.94	-0.07
i	BP(j)	Nuc	#BP_Win	avgMFE	avgZ	avgED	SumZ	SumZ/#TotalWindows	BPs= 6
nt-205	-	U	120	-	-	-	-	-
205	NoBP	U	5	-45.18	-2.82	18.7	-14.1	-0.12
205	104	G	1	-41.2	-3.15	17.64	-3.15	-0.03
205	170	A	34	-47.64	-2.73	12.99	-92.83	-0.77
205	97	A	5	-41.74	-3.02	18.37	-15.09	-0.13
205	209	A	15	-48.06	-3.06	22.17	-45.87	-0.38
205	260	A	56	-51.04	-2.98	10.75	-166.77	-1.39
205	192	G	4	-46.35	-2.24	22.42	-8.94	-0.07
i	BP(j)	Nuc	#BP_Win	avgMFE	avgZ	avgED	SumZ	SumZ/#TotalWindows	BPs= 3
nt-206	-	G	120	-	-	-	-	-
206	NoBP	G	27	-46.35	-2.93	21.38	-79.14	-0.66
206	169	U	34	-47.64	-2.73	12.99	-92.83	-0.77
206	259	U	56	-51.04	-2.98	10.75	-166.77	-1.39
206	253	C	3	-45.33	-2.35	15.43	-7.05	-0.06
i	BP(j)	Nuc	#BP_Win	avgMFE	avgZ	avgED	SumZ	SumZ/#TotalWindows	BPs= 5
nt-207	-	C	120	-	-	-	-	-
207	168	G	34	-47.64	-2.73	12.99	-92.83	-0.77
207	NoBP	C	76	-49.84	-3	13.5	-227.73	-1.9
207	225	G	2	-47.65	-3.04	22.83	-6.09	-0.05
207	190	G	4	-46.35	-2.24	22.42	-8.94	-0.07
207	252	G	3	-45.33	-2.35	15.43	-7.05	-0.06
207	325	G	1	-46.5	-2.63	12.58	-2.63	-0.02
i	BP(j)	Nuc	#BP_Win	avgMFE	avgZ	avgED	SumZ	SumZ/#TotalWindows	BPs= 6
nt-208	-	C	120	-	-	-	-	-
208	NoBP	C	104	-49.57	-2.92	13.07	-303.59	-2.53
208	94	G	5	-41.74	-3.02	18.37	-15.09	-0.13
208	224	G	2	-47.65	-3.04	22.83	-6.09	-0.05
208	147	G	1	-46.9	-1.64	25.9	-1.64	-0.01
208	189	G	4	-46.35	-2.24	22.42	-8.94	-0.07
208	251	G	3	-45.33	-2.35	15.43	-7.05	-0.06
208	324	G	1	-46.5	-2.63	12.58	-2.63	-0.02
i	BP(j)	Nuc	#BP_Win	avgMFE	avgZ	avgED	SumZ	SumZ/#TotalWindows	BPs= 5
nt-209	-	A	120	-	-	-	-	-
209	NoBP	A	95	-49.4	-2.89	12	-274.85	-2.29
209	205	U	15	-48.06	-3.06	22.17	-45.87	-0.38
209	223	U	2	-47.65	-3.04	22.83	-6.09	-0.05
209	146	U	1	-46.9	-1.64	25.9	-1.64	-0.01
209	188	U	4	-46.35	-2.24	22.42	-8.94	-0.07
209	250	U	3	-45.33	-2.35	15.43	-7.05	-0.06
i	BP(j)	Nuc	#BP_Win	avgMFE	avgZ	avgED	SumZ	SumZ/#TotalWindows	BPs= 5
nt-210	-	G	120	-	-	-	-	-
210	NoBP	G	26	-47.53	-2.72	15.15	-70.67	-0.59
210	106	U	7	-43.09	-2.82	9.84	-19.75	-0.16
210	204	C	15	-48.06	-3.06	22.17	-45.87	-0.38
210	222	C	2	-47.65	-3.04	22.83	-6.09	-0.05
210	145	U	1	-46.9	-1.64	25.9	-1.64	-0.01
210	253	C	69	-50.46	-2.89	11.82	-199.7	-1.66
i	BP(j)	Nuc	#BP_Win	avgMFE	avgZ	avgED	SumZ	SumZ/#TotalWindows	BPs= 7
nt-211	-	C	120	-	-	-	-	-
211	NoBP	C	6	-43.55	-2.59	18.05	-15.55	-0.13
211	166	G	19	-49.1	-2.76	14.26	-52.43	-0.44
211	105	G	7	-43.09	-2.82	9.84	-19.75	-0.16
211	203	G	15	-48.06	-3.06	22.17	-45.87	-0.38
211	221	G	2	-47.65	-3.04	22.83	-6.09	-0.05
211	143	G	1	-46.9	-1.64	25.9	-1.64	-0.01
211	252	G	69	-50.46	-2.89	11.82	-199.7	-1.66
211	325	G	1	-44.1	-2.49	14.26	-2.49	-0.02
i	BP(j)	Nuc	#BP_Win	avgMFE	avgZ	avgED	SumZ	SumZ/#TotalWindows	BPs= 6
nt-212	-	C	120	-	-	-	-	-
212	NoBP	C	8	-44.71	-2.65	19.02	-21.17	-0.18
212	165	G	19	-49.1	-2.76	14.26	-52.43	-0.44
212	104	G	7	-43.09	-2.82	9.84	-19.75	-0.16
212	202	G	15	-48.06	-3.06	22.17	-45.87	-0.38
212	142	G	1	-46.9	-1.64	25.9	-1.64	-0.01
212	251	G	69	-50.46	-2.89	11.82	-199.7	-1.66
212	324	G	1	-44.1	-2.49	14.26	-2.49	-0.02
i	BP(j)	Nuc	#BP_Win	avgMFE	avgZ	avgED	SumZ	SumZ/#TotalWindows	BPs= 6
nt-213	-	G	120	-	-	-	-	-
213	NoBP	G	11	-45.76	-3.16	24.48	-34.77	-0.29
213	164	C	19	-49.1	-2.76	14.26	-52.43	-0.44
213	103	U	7	-43.09	-2.82	9.84	-19.75	-0.16
213	220	U	2	-47.65	-3.04	22.83	-6.09	-0.05
213	141	C	1	-46.9	-1.64	25.9	-1.64	-0.01
213	250	U	69	-50.46	-2.89	11.82	-199.7	-1.66
213	249	U	11	-47.69	-2.54	16.27	-27.93	-0.23
i	BP(j)	Nuc	#BP_Win	avgMFE	avgZ	avgED	SumZ	SumZ/#TotalWindows	BPs= 4
nt-214	-	G	120	-	-	-	-	-
214	NoBP	G	26	-47.82	-2.98	18.33	-77.38	-0.64
214	102	C	7	-43.09	-2.82	9.84	-19.75	-0.16
214	219	C	2	-47.65	-3.04	22.83	-6.09	-0.05
214	248	C	84	-49.99	-2.83	12.52	-237.7	-1.98
214	140	C	1	-46.9	-1.64	25.9	-1.64	-0.01
i	BP(j)	Nuc	#BP_Win	avgMFE	avgZ	avgED	SumZ	SumZ/#TotalWindows	BPs= 3
nt-215	-	A	120	-	-	-	-	-
215	101	U	6	-43.28	-2.9	8.45	-17.38	-0.14
215	NoBP	A	29	-47.59	-2.95	18.3	-85.5	-0.71
215	247	U	84	-49.99	-2.83	12.52	-237.7	-1.98
215	139	U	1	-46.9	-1.64	25.9	-1.64	-0.01
i	BP(j)	Nuc	#BP_Win	avgMFE	avgZ	avgED	SumZ	SumZ/#TotalWindows	BPs= 2
nt-216	-	C	120	-	-	-	-	-
216	NoBP	C	26	-47.06	-2.76	13.94	-71.83	-0.6
216	200	G	10	-46.15	-3.21	24.59	-32.05	-0.27
216	246	G	84	-49.99	-2.83	12.52	-237.7	-1.98
i	BP(j)	Nuc	#BP_Win	avgMFE	avgZ	avgED	SumZ	SumZ/#TotalWindows	BPs= 3
nt-217	-	U	120	-	-	-	-	-
217	NoBP	U	17	-46.36	-2.78	14.99	-47.28	-0.39
217	199	A	10	-46.15	-3.21	24.59	-32.05	-0.27
217	243	A	9	-48.12	-2.69	12.44	-24.17	-0.2
217	245	G	84	-49.99	-2.83	12.52	-237.7	-1.98
i	BP(j)	Nuc	#BP_Win	avgMFE	avgZ	avgED	SumZ	SumZ/#TotalWindows	BPs= 2
nt-218	-	U	120	-	-	-	-	-
218	NoBP	U	17	-46.24	-2.71	15.31	-46.08	-0.38
218	198	A	10	-46.15	-3.21	24.59	-32.05	-0.27
218	242	G	93	-49.81	-2.82	12.51	-261.87	-2.18
i	BP(j)	Nuc	#BP_Win	avgMFE	avgZ	avgED	SumZ	SumZ/#TotalWindows	BPs= 3
nt-219	-	C	120	-	-	-	-	-
219	NoBP	C	10	-45.7	-2.8	14.19	-28	-0.23
219	197	G	10	-46.15	-3.21	24.59	-32.05	-0.27
219	214	G	2	-47.65	-3.04	22.83	-6.09	-0.05
219	241	G	98	-49.65	-2.79	12.66	-273.46	-2.28
i	BP(j)	Nuc	#BP_Win	avgMFE	avgZ	avgED	SumZ	SumZ/#TotalWindows	BPs= 2
nt-220	-	U	120	-	-	-	-	-
220	NoBP	U	19	-46.06	-3.01	20.01	-57.16	-0.48
220	213	G	2	-47.65	-3.04	22.83	-6.09	-0.05
220	240	A	99	-49.58	-2.79	12.64	-276.33	-2.3
i	BP(j)	Nuc	#BP_Win	avgMFE	avgZ	avgED	SumZ	SumZ/#TotalWindows	BPs= 3
nt-221	-	G	120	-	-	-	-	-
221	NoBP	G	11	-45.76	-3.13	24.01	-34.42	-0.29
221	156	C	7	-46.93	-2.83	15.37	-19.84	-0.17
221	211	C	2	-47.65	-3.04	22.83	-6.09	-0.05
221	239	C	100	-49.52	-2.79	12.64	-279.38	-2.33
i	BP(j)	Nuc	#BP_Win	avgMFE	avgZ	avgED	SumZ	SumZ/#TotalWindows	BPs= 2
nt-222	-	C	120	-	-	-	-	-
222	NoBP	C	111	-49.16	-2.84	13.72	-314.74	-2.62
222	155	G	7	-46.93	-2.83	15.37	-19.84	-0.17
222	210	G	2	-47.65	-3.04	22.83	-6.09	-0.05
i	BP(j)	Nuc	#BP_Win	avgMFE	avgZ	avgED	SumZ	SumZ/#TotalWindows	BPs= 3
nt-223	-	U	120	-	-	-	-	-
223	NoBP	U	3	-43.87	-2.55	17.31	-7.65	-0.06
223	119	A	9	-46.64	-3.24	24.85	-29.15	-0.24
223	209	A	2	-47.65	-3.04	22.83	-6.09	-0.05
223	237	A	106	-49.38	-2.82	12.71	-298.39	-2.49
i	BP(j)	Nuc	#BP_Win	avgMFE	avgZ	avgED	SumZ	SumZ/#TotalWindows	BPs= 3
nt-224	-	G	120	-	-	-	-	-
224	NoBP	G	1	-41.8	-2.47	16.86	-2.47	-0.02
224	118	C	9	-46.64	-3.24	24.85	-29.15	-0.24
224	208	C	2	-47.65	-3.04	22.83	-6.09	-0.05
224	236	C	108	-49.3	-2.8	12.81	-302.63	-2.52
i	BP(j)	Nuc	#BP_Win	avgMFE	avgZ	avgED	SumZ	SumZ/#TotalWindows	BPs= 3
nt-225	-	G	120	-	-	-	-	-
225	117	C	9	-46.64	-3.24	24.85	-29.15	-0.24
225	207	C	2	-47.65	-3.04	22.83	-6.09	-0.05
225	235	C	108	-49.3	-2.8	12.81	-302.63	-2.52
225	NoBP	G	1	-41.3	-2.82	13.71	-2.82	-0.02
i	BP(j)	Nuc	#BP_Win	avgMFE	avgZ	avgED	SumZ	SumZ/#TotalWindows	BPs= 4
nt-226	-	G	120	-	-	-	-	-
226	116	C	8	-47.21	-3.3	25.29	-26.4	-0.22
226	204	C	2	-47.65	-3.04	22.83	-6.09	-0.05
226	234	C	108	-49.3	-2.8	12.81	-302.63	-2.52
226	253	C	2	-41.35	-3.11	13.58	-6.22	-0.05
i	BP(j)	Nuc	#BP_Win	avgMFE	avgZ	avgED	SumZ	SumZ/#TotalWindows	BPs= 4
nt-227	-	U	120	-	-	-	-	-
227	115	A	7	-47.44	-3.29	25.3	-23	-0.19
227	203	G	2	-47.65	-3.04	22.83	-6.09	-0.05
227	233	G	108	-49.3	-2.8	12.81	-302.63	-2.52
227	252	G	2	-41.35	-3.11	13.58	-6.22	-0.05
227	NoBP	U	1	-37.4	-2.1	20.21	-2.1	-0.02
i	BP(j)	Nuc	#BP_Win	avgMFE	avgZ	avgED	SumZ	SumZ/#TotalWindows	BPs= 3
nt-228	-	C	120	-	-	-	-	-
228	NoBP	C	8	-44.98	-3.02	24.07	-24.16	-0.2
228	202	G	2	-47.65	-3.04	22.83	-6.09	-0.05
228	232	G	108	-49.3	-2.8	12.81	-302.63	-2.52
228	251	G	2	-41.35	-3.11	13.58	-6.22	-0.05
i	BP(j)	Nuc	#BP_Win	avgMFE	avgZ	avgED	SumZ	SumZ/#TotalWindows	BPs= 1
nt-229	-	A	120	-	-	-	-	-
229	NoBP	A	118	-48.89	-2.82	13.7	-332.32	-2.77
229	250	U	2	-41.35	-3.11	13.58	-6.22	-0.05
i	BP(j)	Nuc	#BP_Win	avgMFE	avgZ	avgED	SumZ	SumZ/#TotalWindows	BPs= 1
nt-230	-	U	120	-	-	-	-	-
230	NoBP	U	118	-48.7	-2.81	13.5	-331.08	-2.76
230	119	A	2	-47.65	-3.04	22.83	-6.09	-0.05
i	BP(j)	Nuc	#BP_Win	avgMFE	avgZ	avgED	SumZ	SumZ/#TotalWindows	BPs= 2
nt-231	-	G	120	-	-	-	-	-
231	NoBP	G	116	-48.74	-2.79	13.45	-323.13	-2.69
231	118	C	2	-47.65	-3.04	22.83	-6.09	-0.05
231	249	U	2	-41.35	-3.11	13.58	-6.22	-0.05
i	BP(j)	Nuc	#BP_Win	avgMFE	avgZ	avgED	SumZ	SumZ/#TotalWindows	BPs= 3
nt-232	-	G	120	-	-	-	-	-
232	NoBP	G	8	-39.92	-2.56	21.39	-20.47	-0.17
232	117	C	2	-47.65	-3.04	22.83	-6.09	-0.05
232	228	C	108	-49.3	-2.8	12.81	-302.63	-2.52
232	248	C	2	-41.35	-3.11	13.58	-6.22	-0.05
i	BP(j)	Nuc	#BP_Win	avgMFE	avgZ	avgED	SumZ	SumZ/#TotalWindows	BPs= 4
nt-233	-	G	120	-	-	-	-	-
233	NoBP	G	1	-47.5	-2.99	27.2	-2.99	-0.02
233	116	C	2	-47.65	-3.04	22.83	-6.09	-0.05
233	227	U	108	-49.3	-2.8	12.81	-302.63	-2.52
233	247	U	2	-41.35	-3.11	13.58	-6.22	-0.05
233	253	C	7	-37.41	-2.4	19.51	-16.8	-0.14
i	BP(j)	Nuc	#BP_Win	avgMFE	avgZ	avgED	SumZ	SumZ/#TotalWindows	BPs= 3
nt-234	-	C	120	-	-	-	-	-
234	NoBP	C	3	-44.03	-3.05	21.03	-9.15	-0.08
234	226	G	108	-49.3	-2.8	12.81	-302.63	-2.52
234	246	G	2	-41.35	-3.11	13.58	-6.22	-0.05
234	252	G	7	-37.41	-2.4	19.51	-16.8	-0.14
i	BP(j)	Nuc	#BP_Win	avgMFE	avgZ	avgED	SumZ	SumZ/#TotalWindows	BPs= 4
nt-235	-	C	120	-	-	-	-	-
235	NoBP	C	2	-42.05	-3.36	20.14	-6.72	-0.06
235	225	G	108	-49.3	-2.8	12.81	-302.63	-2.52
235	245	G	2	-41.35	-3.11	13.58	-6.22	-0.05
235	251	G	7	-37.41	-2.4	19.51	-16.8	-0.14
235	342	G	1	-36.8	-3.06	17.44	-3.06	-0.03
i	BP(j)	Nuc	#BP_Win	avgMFE	avgZ	avgED	SumZ	SumZ/#TotalWindows	BPs= 3
nt-236	-	C	120	-	-	-	-	-
236	224	G	108	-49.3	-2.8	12.81	-302.63	-2.52
236	NoBP	C	9	-38.29	-2.56	18.19	-23.02	-0.19
236	341	G	1	-36.8	-3.06	17.44	-3.06	-0.03
236	254	G	2	-36.6	-3.32	15.52	-6.63	-0.06
i	BP(j)	Nuc	#BP_Win	avgMFE	avgZ	avgED	SumZ	SumZ/#TotalWindows	BPs= 3
nt-237	-	A	120	-	-	-	-	-
237	223	U	106	-49.38	-2.82	12.71	-298.39	-2.49
237	NoBP	A	6	-39.02	-3	14.78	-18.02	-0.15
237	247	U	7	-37.41	-2.4	19.51	-16.8	-0.14
237	340	U	1	-36.8	-3.06	17.44	-3.06	-0.03
i	BP(j)	Nuc	#BP_Win	avgMFE	avgZ	avgED	SumZ	SumZ/#TotalWindows	BPs= 3
nt-238	-	U	120	-	-	-	-	-
238	NoBP	U	109	-49.05	-2.81	12.77	-306.77	-2.56
238	246	G	7	-37.41	-2.4	19.51	-16.8	-0.14
238	339	A	1	-36.8	-3.06	17.44	-3.06	-0.03
238	252	G	3	-36.37	-3.17	15.08	-9.5	-0.08
i	BP(j)	Nuc	#BP_Win	avgMFE	avgZ	avgED	SumZ	SumZ/#TotalWindows	BPs= 3
nt-239	-	C	120	-	-	-	-	-
239	NoBP	C	8	-43.3	-3.03	14.78	-24.25	-0.2
239	221	G	100	-49.52	-2.79	12.64	-279.38	-2.33
239	245	G	7	-37.41	-2.4	19.51	-16.8	-0.14
239	251	G	5	-36.1	-2.97	15.23	-14.86	-0.12
i	BP(j)	Nuc	#BP_Win	avgMFE	avgZ	avgED	SumZ	SumZ/#TotalWindows	BPs= 4
nt-240	-	A	120	-	-	-	-	-
240	NoBP	A	4	-41.92	-2.9	15	-11.62	-0.1
240	220	U	99	-49.58	-2.79	12.64	-276.33	-2.3
240	259	U	5	-41.62	-3.05	14.68	-15.23	-0.13
240	244	U	7	-37.41	-2.4	19.51	-16.8	-0.14
240	250	U	5	-36.1	-2.97	15.23	-14.86	-0.12
i	BP(j)	Nuc	#BP_Win	avgMFE	avgZ	avgED	SumZ	SumZ/#TotalWindows	BPs= 4
nt-241	-	G	120	-	-	-	-	-
241	219	C	98	-49.65	-2.79	12.66	-273.46	-2.28
241	258	C	6	-41.87	-3.02	14.07	-18.1	-0.15
241	NoBP	G	9	-38.29	-2.56	18.19	-23.02	-0.19
241	249	U	5	-36.1	-2.97	15.23	-14.86	-0.12
241	359	C	2	-36.35	-3.32	14.52	-6.63	-0.06
i	BP(j)	Nuc	#BP_Win	avgMFE	avgZ	avgED	SumZ	SumZ/#TotalWindows	BPs= 6
nt-242	-	G	120	-	-	-	-	-
242	NoBP	G	10	-39.63	-2.58	17.35	-25.81	-0.22
242	218	U	93	-49.81	-2.82	12.51	-261.87	-2.18
242	149	C	1	-47.1	-1.79	27.15	-1.79	-0.01
242	257	U	8	-41.9	-2.82	13.86	-22.52	-0.19
242	248	C	5	-36.1	-2.97	15.23	-14.86	-0.12
242	358	U	2	-36.35	-3.32	14.52	-6.63	-0.06
242	359	C	1	-35.9	-3.05	12.29	-3.05	-0.03
i	BP(j)	Nuc	#BP_Win	avgMFE	avgZ	avgED	SumZ	SumZ/#TotalWindows	BPs= 6
nt-243	-	A	120	-	-	-	-	-
243	217	U	9	-48.12	-2.69	12.44	-24.17	-0.2
243	NoBP	A	94	-48.7	-2.8	13.1	-263.57	-2.2
243	148	U	1	-47.1	-1.79	27.15	-1.79	-0.01
243	256	U	8	-41.9	-2.82	13.86	-22.52	-0.19
243	247	U	5	-36.1	-2.97	15.23	-14.86	-0.12
243	357	U	2	-36.35	-3.32	14.52	-6.63	-0.06
243	358	U	1	-35.9	-3.05	12.29	-3.05	-0.03
i	BP(j)	Nuc	#BP_Win	avgMFE	avgZ	avgED	SumZ	SumZ/#TotalWindows	BPs= 4
nt-244	-	U	120	-	-	-	-	-
244	NoBP	U	102	-48.51	-2.83	12.76	-288.69	-2.41
244	147	G	1	-47.1	-1.79	27.15	-1.79	-0.01
244	255	A	8	-41.9	-2.82	13.86	-22.52	-0.19
244	240	A	7	-37.41	-2.4	19.51	-16.8	-0.14
244	356	G	2	-36.35	-3.32	14.52	-6.63	-0.06
i	BP(j)	Nuc	#BP_Win	avgMFE	avgZ	avgED	SumZ	SumZ/#TotalWindows	BPs= 5
nt-245	-	G	120	-	-	-	-	-
245	NoBP	G	23	-40.56	-2.91	14.52	-66.99	-0.56
245	217	U	84	-49.99	-2.83	12.52	-237.7	-1.98
245	146	U	1	-47.1	-1.79	27.15	-1.79	-0.01
245	274	U	3	-41.23	-2.24	11.23	-6.73	-0.06
245	235	C	2	-41.35	-3.11	13.58	-6.22	-0.05
245	239	C	7	-37.41	-2.4	19.51	-16.8	-0.14
i	BP(j)	Nuc	#BP_Win	avgMFE	avgZ	avgED	SumZ	SumZ/#TotalWindows	BPs= 7
nt-246	-	G	120	-	-	-	-	-
246	NoBP	G	14	-38.13	-3.06	14.33	-42.88	-0.36
246	216	C	84	-49.99	-2.83	12.52	-237.7	-1.98
246	145	U	1	-47.1	-1.79	27.15	-1.79	-0.01
246	138	U	1	-46.9	-1.64	25.9	-1.64	-0.01
246	273	U	3	-41.23	-2.24	11.23	-6.73	-0.06
246	253	C	8	-41.9	-2.82	13.86	-22.52	-0.19
246	234	C	2	-41.35	-3.11	13.58	-6.22	-0.05
246	238	U	7	-37.41	-2.4	19.51	-16.8	-0.14
i	BP(j)	Nuc	#BP_Win	avgMFE	avgZ	avgED	SumZ	SumZ/#TotalWindows	BPs= 10
nt-247	-	U	120	-	-	-	-	-
247	NoBP	U	1	-51	-2.68	13.32	-2.68	-0.02
247	215	A	84	-49.99	-2.83	12.52	-237.7	-1.98
247	144	A	1	-47.1	-1.79	27.15	-1.79	-0.01
247	137	A	1	-46.9	-1.64	25.9	-1.64	-0.01
247	272	A	3	-41.23	-2.24	11.23	-6.73	-0.06
247	252	G	8	-41.9	-2.82	13.86	-22.52	-0.19
247	233	G	2	-41.35	-3.11	13.58	-6.22	-0.05
247	237	A	7	-37.41	-2.4	19.51	-16.8	-0.14
247	243	A	5	-36.1	-2.97	15.23	-14.86	-0.12
247	354	A	4	-35.67	-3.13	14.23	-12.53	-0.1
247	363	A	4	-35.75	-3.19	14.33	-12.76	-0.11
i	BP(j)	Nuc	#BP_Win	avgMFE	avgZ	avgED	SumZ	SumZ/#TotalWindows	BPs= 8
nt-248	-	C	120	-	-	-	-	-
248	214	G	84	-49.99	-2.83	12.52	-237.7	-1.98
248	143	G	1	-47.1	-1.79	27.15	-1.79	-0.01
248	136	G	1	-46.9	-1.64	25.9	-1.64	-0.01
248	271	G	3	-41.23	-2.24	11.23	-6.73	-0.06
248	NoBP	C	15	-39.81	-2.62	16.5	-39.32	-0.33
248	232	G	2	-41.35	-3.11	13.58	-6.22	-0.05
248	242	G	5	-36.1	-2.97	15.23	-14.86	-0.12
248	353	G	4	-35.67	-3.13	14.23	-12.53	-0.1
248	362	G	5	-35.46	-3.24	14.32	-16.19	-0.13
i	BP(j)	Nuc	#BP_Win	avgMFE	avgZ	avgED	SumZ	SumZ/#TotalWindows	BPs= 8
nt-249	-	U	120	-	-	-	-	-
249	NoBP	U	88	-48.33	-2.84	12.76	-249.7	-2.08
249	142	G	1	-47.1	-1.79	27.15	-1.79	-0.01
249	135	G	1	-46.9	-1.64	25.9	-1.64	-0.01
249	213	G	11	-47.69	-2.54	16.27	-27.93	-0.23
249	270	A	3	-41.23	-2.24	11.23	-6.73	-0.06
249	231	G	2	-41.35	-3.11	13.58	-6.22	-0.05
249	241	G	5	-36.1	-2.97	15.23	-14.86	-0.12
249	352	A	4	-35.67	-3.13	14.23	-12.53	-0.1
249	361	A	5	-35.46	-3.24	14.32	-16.19	-0.13
i	BP(j)	Nuc	#BP_Win	avgMFE	avgZ	avgED	SumZ	SumZ/#TotalWindows	BPs= 9
nt-250	-	U	120	-	-	-	-	-
250	NoBP	U	23	-40.41	-2.58	16.7	-59.45	-0.5
250	134	A	1	-46.9	-1.64	25.9	-1.64	-0.01
250	213	G	69	-50.46	-2.89	11.82	-199.7	-1.66
250	150	A	5	-51.88	-2.76	17.34	-13.82	-0.12
250	209	A	3	-45.33	-2.35	15.43	-7.05	-0.06
250	269	G	3	-41.23	-2.24	11.23	-6.73	-0.06
250	229	A	2	-41.35	-3.11	13.58	-6.22	-0.05
250	240	A	5	-36.1	-2.97	15.23	-14.86	-0.12
250	351	A	4	-35.67	-3.13	14.23	-12.53	-0.1
250	360	A	5	-35.46	-3.24	14.32	-16.19	-0.13
i	BP(j)	Nuc	#BP_Win	avgMFE	avgZ	avgED	SumZ	SumZ/#TotalWindows	BPs= 8
nt-251	-	G	120	-	-	-	-	-
251	NoBP	G	17	-39.46	-2.78	15.5	-47.24	-0.39
251	212	C	69	-50.46	-2.89	11.82	-199.7	-1.66
251	149	C	5	-51.88	-2.76	17.34	-13.82	-0.12
251	208	C	3	-45.33	-2.35	15.43	-7.05	-0.06
251	263	C	7	-42.1	-2.39	13.8	-16.76	-0.14
251	228	C	2	-41.35	-3.11	13.58	-6.22	-0.05
251	235	C	7	-37.41	-2.4	19.51	-16.8	-0.14
251	239	C	5	-36.1	-2.97	15.23	-14.86	-0.12
251	359	C	5	-35.46	-3.24	14.32	-16.19	-0.13
i	BP(j)	Nuc	#BP_Win	avgMFE	avgZ	avgED	SumZ	SumZ/#TotalWindows	BPs= 9
nt-252	-	G	120	-	-	-	-	-
252	NoBP	G	11	-35.76	-2.87	15.51	-31.57	-0.26
252	211	C	69	-50.46	-2.89	11.82	-199.7	-1.66
252	148	U	5	-51.88	-2.76	17.34	-13.82	-0.12
252	207	C	3	-45.33	-2.35	15.43	-7.05	-0.06
252	262	C	7	-42.1	-2.39	13.8	-16.76	-0.14
252	247	U	8	-41.9	-2.82	13.86	-22.52	-0.19
252	227	U	2	-41.35	-3.11	13.58	-6.22	-0.05
252	234	C	7	-37.41	-2.4	19.51	-16.8	-0.14
252	238	U	3	-36.37	-3.17	15.08	-9.5	-0.08
252	358	U	5	-35.46	-3.24	14.32	-16.19	-0.13
i	BP(j)	Nuc	#BP_Win	avgMFE	avgZ	avgED	SumZ	SumZ/#TotalWindows	BPs= 7
nt-253	-	C	120	-	-	-	-	-
253	210	G	69	-50.46	-2.89	11.82	-199.7	-1.66
253	147	G	5	-51.88	-2.76	17.34	-13.82	-0.12
253	206	G	3	-45.33	-2.35	15.43	-7.05	-0.06
253	261	G	7	-42.1	-2.39	13.8	-16.76	-0.14
253	246	G	8	-41.9	-2.82	13.86	-22.52	-0.19
253	226	G	2	-41.35	-3.11	13.58	-6.22	-0.05
253	233	G	7	-37.41	-2.4	19.51	-16.8	-0.14
253	NoBP	C	19	-35.07	-3.06	14.54	-58.05	-0.48
i	BP(j)	Nuc	#BP_Win	avgMFE	avgZ	avgED	SumZ	SumZ/#TotalWindows	BPs= 4
nt-254	-	G	120	-	-	-	-	-
254	NoBP	G	106	-45.74	-2.85	12.92	-302.17	-2.52
254	146	U	5	-51.88	-2.76	17.34	-13.82	-0.12
254	275	C	4	-45.62	-2.42	14.72	-9.68	-0.08
254	284	C	3	-46.2	-2.8	18.07	-8.4	-0.07
254	236	C	2	-36.6	-3.32	15.52	-6.63	-0.06
i	BP(j)	Nuc	#BP_Win	avgMFE	avgZ	avgED	SumZ	SumZ/#TotalWindows	BPs= 4
nt-255	-	A	120	-	-	-	-	-
255	NoBP	A	100	-45.68	-2.87	12.95	-286.7	-2.39
255	145	U	5	-51.88	-2.76	17.34	-13.82	-0.12
255	274	U	4	-45.62	-2.42	14.72	-9.68	-0.08
255	283	U	3	-46.2	-2.8	18.07	-8.4	-0.07
255	244	U	8	-41.9	-2.82	13.86	-22.52	-0.19
i	BP(j)	Nuc	#BP_Win	avgMFE	avgZ	avgED	SumZ	SumZ/#TotalWindows	BPs= 5
nt-256	-	U	120	-	-	-	-	-
256	NoBP	U	73	-49.62	-2.85	11.94	-207.93	-1.73
256	144	A	5	-51.88	-2.76	17.34	-13.82	-0.12
256	282	A	3	-46.2	-2.8	18.07	-8.4	-0.07
256	243	A	8	-41.9	-2.82	13.86	-22.52	-0.19
256	343	A	26	-35.94	-2.82	15.97	-73.29	-0.61
256	355	A	5	-35.46	-3.24	14.32	-16.19	-0.13
i	BP(j)	Nuc	#BP_Win	avgMFE	avgZ	avgED	SumZ	SumZ/#TotalWindows	BPs= 6
nt-257	-	U	120	-	-	-	-	-
257	NoBP	U	69	-49.59	-2.88	11.84	-198.49	-1.65
257	143	G	5	-51.88	-2.76	17.34	-13.82	-0.12
257	272	A	4	-45.62	-2.42	14.72	-9.68	-0.08
257	281	A	3	-46.2	-2.8	18.07	-8.4	-0.07
257	242	G	8	-41.9	-2.82	13.86	-22.52	-0.19
257	342	G	26	-35.94	-2.82	15.97	-73.29	-0.61
257	354	A	5	-35.46	-3.24	14.32	-16.19	-0.13
i	BP(j)	Nuc	#BP_Win	avgMFE	avgZ	avgED	SumZ	SumZ/#TotalWindows	BPs= 5
nt-258	-	C	120	-	-	-	-	-
258	142	G	4	-52.48	-2.92	16.57	-11.7	-0.1
258	NoBP	C	75	-49.02	-2.84	12.25	-213.02	-1.78
258	271	G	4	-45.62	-2.42	14.72	-9.68	-0.08
258	241	G	6	-41.87	-3.02	14.07	-18.1	-0.15
258	341	G	26	-35.94	-2.82	15.97	-73.29	-0.61
258	353	G	5	-35.46	-3.24	14.32	-16.19	-0.13
i	BP(j)	Nuc	#BP_Win	avgMFE	avgZ	avgED	SumZ	SumZ/#TotalWindows	BPs= 5
nt-259	-	U	120	-	-	-	-	-
259	NoBP	U	20	-45.52	-2.47	16.68	-49.41	-0.41
259	206	G	56	-51.04	-2.98	10.75	-166.77	-1.39
259	270	A	4	-45.62	-2.42	14.72	-9.68	-0.08
259	339	A	30	-35.88	-2.82	15.71	-84.62	-0.71
259	240	A	5	-41.62	-3.05	14.68	-15.23	-0.13
259	352	A	5	-35.46	-3.24	14.32	-16.19	-0.13
i	BP(j)	Nuc	#BP_Win	avgMFE	avgZ	avgED	SumZ	SumZ/#TotalWindows	BPs= 2
nt-260	-	A	120	-	-	-	-	-
260	NoBP	A	22	-45.34	-2.43	16.59	-53.47	-0.45
260	205	U	56	-51.04	-2.98	10.75	-166.77	-1.39
260	338	U	42	-36.57	-2.89	15.37	-121.48	-1.01
i	BP(j)	Nuc	#BP_Win	avgMFE	avgZ	avgED	SumZ	SumZ/#TotalWindows	BPs= 4
nt-261	-	G	120	-	-	-	-	-
261	NoBP	G	10	-47	-2.38	18.44	-23.76	-0.2
261	204	C	56	-51.04	-2.98	10.75	-166.77	-1.39
261	280	C	3	-46.2	-2.8	18.07	-8.4	-0.07
261	253	C	7	-42.1	-2.39	13.8	-16.76	-0.14
261	337	C	44	-36.56	-2.85	15.37	-125.6	-1.05
i	BP(j)	Nuc	#BP_Win	avgMFE	avgZ	avgED	SumZ	SumZ/#TotalWindows	BPs= 4
nt-262	-	C	120	-	-	-	-	-
262	NoBP	C	10	-44.52	-2.2	19.9	-21.99	-0.18
262	203	G	56	-51.04	-2.98	10.75	-166.77	-1.39
262	279	G	3	-46.2	-2.8	18.07	-8.4	-0.07
262	252	G	7	-42.1	-2.39	13.8	-16.76	-0.14
262	336	G	44	-36.56	-2.85	15.37	-125.6	-1.05
i	BP(j)	Nuc	#BP_Win	avgMFE	avgZ	avgED	SumZ	SumZ/#TotalWindows	BPs= 5
nt-263	-	C	120	-	-	-	-	-
263	202	G	55	-51.18	-3	10.66	-164.75	-1.37
263	NoBP	C	10	-44.01	-2.22	18.91	-22.21	-0.19
263	278	G	3	-46.2	-2.8	18.07	-8.4	-0.07
263	251	G	7	-42.1	-2.39	13.8	-16.76	-0.14
263	335	G	44	-36.56	-2.85	15.37	-125.6	-1.05
263	353	G	1	-27.8	-1.25	30.05	-1.25	-0.01
i	BP(j)	Nuc	#BP_Win	avgMFE	avgZ	avgED	SumZ	SumZ/#TotalWindows	BPs= 4
nt-264	-	U	120	-	-	-	-	-
264	201	A	53	-51.32	-3.02	10.32	-160.16	-1.33
264	NoBP	U	20	-44.47	-2.4	16.5	-48	-0.4
264	334	A	44	-36.56	-2.85	15.37	-125.6	-1.05
264	352	A	1	-27.8	-1.25	30.05	-1.25	-0.01
264	364	A	2	-29.4	-1.67	23.92	-3.34	-0.03
i	BP(j)	Nuc	#BP_Win	avgMFE	avgZ	avgED	SumZ	SumZ/#TotalWindows	BPs= 4
nt-265	-	U	120	-	-	-	-	-
265	200	G	51	-51.49	-3.04	10.23	-155.02	-1.29
265	NoBP	U	22	-43.68	-2.35	16.77	-51.79	-0.43
265	333	G	44	-36.56	-2.85	15.37	-125.6	-1.05
265	351	A	1	-27.8	-1.25	30.05	-1.25	-0.01
265	363	A	2	-29.4	-1.67	23.92	-3.34	-0.03
i	BP(j)	Nuc	#BP_Win	avgMFE	avgZ	avgED	SumZ	SumZ/#TotalWindows	BPs= 4
nt-266	-	U	120	-	-	-	-	-
266	199	A	48	-51.8	-3.09	10.18	-148.42	-1.24
266	NoBP	U	25	-43.08	-2.28	16.62	-57.09	-0.48
266	332	A	44	-36.56	-2.85	15.37	-125.6	-1.05
266	350	A	1	-27.8	-1.25	30.05	-1.25	-0.01
266	362	G	2	-29.4	-1.67	23.92	-3.34	-0.03
i	BP(j)	Nuc	#BP_Win	avgMFE	avgZ	avgED	SumZ	SumZ/#TotalWindows	BPs= 3
nt-267	-	U	120	-	-	-	-	-
267	198	A	47	-51.76	-3.08	10.27	-144.94	-1.21
267	NoBP	U	27	-41.99	-2.23	17.18	-60.2	-0.5
267	331	A	44	-36.56	-2.85	15.37	-125.6	-1.05
267	361	A	2	-29.4	-1.67	23.92	-3.34	-0.03
i	BP(j)	Nuc	#BP_Win	avgMFE	avgZ	avgED	SumZ	SumZ/#TotalWindows	BPs= 4
nt-268	-	U	120	-	-	-	-	-
268	197	G	45	-51.86	-3.09	10.36	-139.05	-1.16
268	303	A	7	-45.3	-1.99	18.3	-13.91	-0.12
268	NoBP	U	22	-40.51	-2.3	16.44	-50.6	-0.42
268	330	A	44	-36.56	-2.85	15.37	-125.6	-1.05
268	360	A	2	-29.4	-1.67	23.92	-3.34	-0.03
i	BP(j)	Nuc	#BP_Win	avgMFE	avgZ	avgED	SumZ	SumZ/#TotalWindows	BPs= 4
nt-269	-	G	120	-	-	-	-	-
269	NoBP	G	88	-42.18	-2.85	13.91	-250.59	-2.09
269	196	U	9	-51.86	-3.06	12.16	-27.58	-0.23
269	302	C	18	-45.8	-2.4	15.17	-43.24	-0.36
269	250	U	3	-41.23	-2.24	11.23	-6.73	-0.06
269	359	C	2	-29.4	-1.67	23.92	-3.34	-0.03
i	BP(j)	Nuc	#BP_Win	avgMFE	avgZ	avgED	SumZ	SumZ/#TotalWindows	BPs= 6
nt-270	-	A	120	-	-	-	-	-
270	NoBP	A	83	-41.9	-2.88	13.78	-239.33	-1.99
270	195	U	9	-51.86	-3.06	12.16	-27.58	-0.23
270	301	U	18	-45.8	-2.4	15.17	-43.24	-0.36
270	259	U	4	-45.62	-2.42	14.72	-9.68	-0.08
270	249	U	3	-41.23	-2.24	11.23	-6.73	-0.06
270	346	U	1	-27.8	-1.25	30.05	-1.25	-0.01
270	358	U	2	-29.4	-1.67	23.92	-3.34	-0.03
i	BP(j)	Nuc	#BP_Win	avgMFE	avgZ	avgED	SumZ	SumZ/#TotalWindows	BPs= 5
nt-271	-	G	120	-	-	-	-	-
271	NoBP	G	91	-42.27	-2.88	13.88	-262.17	-2.18
271	300	C	19	-46.13	-2.44	14.78	-46.32	-0.39
271	194	C	1	-49.2	-2.56	20.17	-2.56	-0.02
271	258	C	4	-45.62	-2.42	14.72	-9.68	-0.08
271	248	C	3	-41.23	-2.24	11.23	-6.73	-0.06
271	357	U	2	-29.4	-1.67	23.92	-3.34	-0.03
i	BP(j)	Nuc	#BP_Win	avgMFE	avgZ	avgED	SumZ	SumZ/#TotalWindows	BPs= 4
nt-272	-	A	120	-	-	-	-	-
272	NoBP	A	90	-42.26	-2.84	14.29	-255.64	-2.13
272	299	U	19	-46.13	-2.44	14.78	-46.32	-0.39
272	257	U	4	-45.62	-2.42	14.72	-9.68	-0.08
272	247	U	3	-41.23	-2.24	11.23	-6.73	-0.06
272	388	U	4	-31.62	-2.97	13.15	-11.87	-0.1
i	BP(j)	Nuc	#BP_Win	avgMFE	avgZ	avgED	SumZ	SumZ/#TotalWindows	BPs= 6
nt-273	-	U	120	-	-	-	-	-
273	NoBP	U	45	-49	-2.85	12.67	-128.19	-1.07
273	298	G	19	-46.13	-2.44	14.78	-46.32	-0.39
273	246	G	3	-41.23	-2.24	11.23	-6.73	-0.06
273	327	A	44	-36.56	-2.85	15.37	-125.6	-1.05
273	343	A	1	-27.8	-1.25	30.05	-1.25	-0.01
273	355	A	2	-29.4	-1.67	23.92	-3.34	-0.03
273	387	A	6	-31.13	-2.79	13.61	-16.73	-0.14
i	BP(j)	Nuc	#BP_Win	avgMFE	avgZ	avgED	SumZ	SumZ/#TotalWindows	BPs= 8
nt-274	-	U	120	-	-	-	-	-
274	NoBP	U	35	-49.37	-2.88	12.56	-100.66	-0.84
274	180	A	4	-52.4	-3.07	11.84	-12.29	-0.1
274	297	G	19	-46.13	-2.44	14.78	-46.32	-0.39
274	255	A	4	-45.62	-2.42	14.72	-9.68	-0.08
274	245	G	3	-41.23	-2.24	11.23	-6.73	-0.06
274	326	G	44	-36.56	-2.85	15.37	-125.6	-1.05
274	342	G	1	-27.8	-1.25	30.05	-1.25	-0.01
274	354	A	2	-29.4	-1.67	23.92	-3.34	-0.03
274	386	A	8	-30.68	-2.64	14.35	-21.08	-0.18
i	BP(j)	Nuc	#BP_Win	avgMFE	avgZ	avgED	SumZ	SumZ/#TotalWindows	BPs= 8
nt-275	-	C	120	-	-	-	-	-
275	NoBP	C	29	-46.51	-2.66	13.06	-77.22	-0.64
275	177	G	9	-52.84	-3.26	11.67	-29.37	-0.24
275	179	G	4	-52.4	-3.07	11.84	-12.29	-0.1
275	296	G	19	-46.13	-2.44	14.78	-46.32	-0.39
275	254	G	4	-45.62	-2.42	14.72	-9.68	-0.08
275	325	G	44	-36.56	-2.85	15.37	-125.6	-1.05
275	341	G	1	-27.8	-1.25	30.05	-1.25	-0.01
275	353	G	2	-29.4	-1.67	23.92	-3.34	-0.03
275	385	G	8	-30.68	-2.64	14.35	-21.08	-0.18
i	BP(j)	Nuc	#BP_Win	avgMFE	avgZ	avgED	SumZ	SumZ/#TotalWindows	BPs= 4
nt-276	-	A	120	-	-	-	-	-
276	NoBP	A	87	-39.28	-2.71	14.79	-235.79	-1.96
276	176	U	9	-52.84	-3.26	11.67	-29.37	-0.24
276	178	U	4	-52.4	-3.07	11.84	-12.29	-0.1
276	295	U	19	-46.13	-2.44	14.78	-46.32	-0.39
276	340	U	1	-27.8	-1.25	30.05	-1.25	-0.01
i	BP(j)	Nuc	#BP_Win	avgMFE	avgZ	avgED	SumZ	SumZ/#TotalWindows	BPs= 3
nt-277	-	C	120	-	-	-	-	-
277	NoBP	C	94	-41.54	-2.67	14.91	-250.71	-2.09
277	175	G	9	-52.84	-3.26	11.67	-29.37	-0.24
277	177	G	4	-52.4	-3.07	11.84	-12.29	-0.1
277	383	G	13	-29.99	-2.4	15.8	-31.15	-0.26
i	BP(j)	Nuc	#BP_Win	avgMFE	avgZ	avgED	SumZ	SumZ/#TotalWindows	BPs= 6
nt-278	-	G	120	-	-	-	-	-
278	NoBP	G	4	-55.35	-2.82	8.69	-11.3	-0.09
278	174	C	1	-53.4	-2.75	14.96	-2.75	-0.02
278	173	C	8	-52.78	-3.33	11.26	-26.62	-0.22
278	289	C	90	-41.08	-2.66	14.99	-239.76	-2
278	263	C	3	-46.2	-2.8	18.07	-8.4	-0.07
278	338	U	1	-27.8	-1.25	30.05	-1.25	-0.01
278	382	U	13	-29.99	-2.4	15.8	-31.15	-0.26
i	BP(j)	Nuc	#BP_Win	avgMFE	avgZ	avgED	SumZ	SumZ/#TotalWindows	BPs= 6
nt-279	-	G	120	-	-	-	-	-
279	NoBP	G	3	-55.13	-2.75	9.53	-8.24	-0.07
279	173	C	1	-53.4	-2.75	14.96	-2.75	-0.02
279	172	C	8	-52.78	-3.33	11.26	-26.62	-0.22
279	288	C	90	-41.08	-2.66	14.99	-239.76	-2
279	262	C	3	-46.2	-2.8	18.07	-8.4	-0.07
279	337	C	1	-27.8	-1.25	30.05	-1.25	-0.01
279	381	C	14	-29.73	-2.35	16.4	-32.89	-0.27
i	BP(j)	Nuc	#BP_Win	avgMFE	avgZ	avgED	SumZ	SumZ/#TotalWindows	BPs= 5
nt-280	-	C	120	-	-	-	-	-
280	NoBP	C	4	-47.05	-2.39	15.3	-9.54	-0.08
280	171	G	8	-52.78	-3.33	11.26	-26.62	-0.22
280	287	G	90	-41.08	-2.66	14.99	-239.76	-2
280	261	G	3	-46.2	-2.8	18.07	-8.4	-0.07
280	336	G	1	-27.8	-1.25	30.05	-1.25	-0.01
280	380	G	14	-29.73	-2.35	16.4	-32.89	-0.27
i	BP(j)	Nuc	#BP_Win	avgMFE	avgZ	avgED	SumZ	SumZ/#TotalWindows	BPs= 2
nt-281	-	A	120	-	-	-	-	-
281	NoBP	A	103	-41.8	-2.68	15.02	-275.9	-2.3
281	257	U	3	-46.2	-2.8	18.07	-8.4	-0.07
281	379	U	14	-29.73	-2.35	16.4	-32.89	-0.27
i	BP(j)	Nuc	#BP_Win	avgMFE	avgZ	avgED	SumZ	SumZ/#TotalWindows	BPs= 1
nt-282	-	A	120	-	-	-	-	-
282	NoBP	A	117	-40.11	-2.63	15.28	-307.94	-2.57
282	256	U	3	-46.2	-2.8	18.07	-8.4	-0.07
i	BP(j)	Nuc	#BP_Win	avgMFE	avgZ	avgED	SumZ	SumZ/#TotalWindows	BPs= 2
nt-283	-	U	120	-	-	-	-	-
283	NoBP	U	116	-39.76	-2.62	15.39	-303.84	-2.53
283	167	A	1	-53.1	-3.15	11.73	-3.15	-0.03
283	255	A	3	-46.2	-2.8	18.07	-8.4	-0.07
i	BP(j)	Nuc	#BP_Win	avgMFE	avgZ	avgED	SumZ	SumZ/#TotalWindows	BPs= 3
nt-284	-	C	120	-	-	-	-	-
284	NoBP	C	113	-39.91	-2.63	15.23	-297.19	-2.48
284	166	G	1	-53.1	-3.15	11.73	-3.15	-0.03
284	254	G	3	-46.2	-2.8	18.07	-8.4	-0.07
284	341	G	3	-25.4	-1.56	24.62	-4.67	-0.04
i	BP(j)	Nuc	#BP_Win	avgMFE	avgZ	avgED	SumZ	SumZ/#TotalWindows	BPs= 1
nt-285	-	A	120	-	-	-	-	-
285	NoBP	A	117	-39.96	-2.63	15.36	-307.63	-2.56
285	340	U	3	-25.4	-1.56	24.62	-4.67	-0.04
i	BP(j)	Nuc	#BP_Win	avgMFE	avgZ	avgED	SumZ	SumZ/#TotalWindows	BPs= 2
nt-286	-	A	120	-	-	-	-	-
286	NoBP	A	99	-41.69	-2.69	15.04	-265.86	-2.22
286	374	U	18	-28.9	-2.23	17.73	-40.16	-0.33
286	338	U	3	-25.4	-1.56	24.62	-4.67	-0.04
i	BP(j)	Nuc	#BP_Win	avgMFE	avgZ	avgED	SumZ	SumZ/#TotalWindows	BPs= 3
nt-287	-	G	120	-	-	-	-	-
287	NoBP	G	9	-44.78	-2.75	16.75	-24.74	-0.21
287	280	C	90	-41.08	-2.66	14.99	-239.76	-2
287	373	C	18	-28.9	-2.23	17.73	-40.16	-0.33
287	337	C	3	-25.4	-1.56	24.62	-4.67	-0.04
i	BP(j)	Nuc	#BP_Win	avgMFE	avgZ	avgED	SumZ	SumZ/#TotalWindows	BPs= 4
nt-288	-	C	120	-	-	-	-	-
288	NoBP	C	3	-52.77	-3.12	11.08	-9.37	-0.08
288	279	G	90	-41.08	-2.66	14.99	-239.76	-2
288	326	G	6	-36.23	-2.24	21.5	-13.44	-0.11
288	372	G	18	-28.9	-2.23	17.73	-40.16	-0.33
288	336	G	3	-25.4	-1.56	24.62	-4.67	-0.04
i	BP(j)	Nuc	#BP_Win	avgMFE	avgZ	avgED	SumZ	SumZ/#TotalWindows	BPs= 4
nt-289	-	C	120	-	-	-	-	-
289	NoBP	C	3	-43	-2.58	15.29	-7.74	-0.06
289	278	G	90	-41.08	-2.66	14.99	-239.76	-2
289	325	G	6	-36.23	-2.24	21.5	-13.44	-0.11
289	371	G	18	-28.9	-2.23	17.73	-40.16	-0.33
289	335	G	3	-25.4	-1.56	24.62	-4.67	-0.04
i	BP(j)	Nuc	#BP_Win	avgMFE	avgZ	avgED	SumZ	SumZ/#TotalWindows	BPs= 0
nt-290	-	A	120	-	-	-	-	-
290	NoBP	A	120	-38.43	-2.54	16.06	-304.54	-2.54
i	BP(j)	Nuc	#BP_Win	avgMFE	avgZ	avgED	SumZ	SumZ/#TotalWindows	BPs= 2
nt-291	-	U	120	-	-	-	-	-
291	NoBP	U	34	-47.07	-2.53	14.15	-86.03	-0.72
291	180	A	2	-52.8	-3.28	10.99	-6.57	-0.05
291	324	G	84	-34.24	-2.5	17.06	-210.39	-1.75
i	BP(j)	Nuc	#BP_Win	avgMFE	avgZ	avgED	SumZ	SumZ/#TotalWindows	BPs= 2
nt-292	-	C	120	-	-	-	-	-
292	NoBP	C	29	-47.16	-2.52	14.13	-73	-0.61
292	179	G	2	-52.8	-3.28	10.99	-6.57	-0.05
292	323	G	89	-34.61	-2.49	16.99	-221.99	-1.85
i	BP(j)	Nuc	#BP_Win	avgMFE	avgZ	avgED	SumZ	SumZ/#TotalWindows	BPs= 2
nt-293	-	A	120	-	-	-	-	-
293	NoBP	A	27	-47.11	-2.52	14.14	-68.03	-0.57
293	178	U	2	-52.8	-3.28	10.99	-6.57	-0.05
293	322	U	91	-34.55	-2.47	17.02	-225.14	-1.88
i	BP(j)	Nuc	#BP_Win	avgMFE	avgZ	avgED	SumZ	SumZ/#TotalWindows	BPs= 2
nt-294	-	C	120	-	-	-	-	-
294	NoBP	C	25	-46.98	-2.5	14.25	-62.46	-0.52
294	177	G	2	-52.8	-3.28	10.99	-6.57	-0.05
294	321	G	93	-34.49	-2.45	17.13	-227.85	-1.9
i	BP(j)	Nuc	#BP_Win	avgMFE	avgZ	avgED	SumZ	SumZ/#TotalWindows	BPs= 2
nt-295	-	U	120	-	-	-	-	-
295	NoBP	U	7	-46.5	-2.57	14.36	-18.01	-0.15
295	276	A	19	-46.13	-2.44	14.78	-46.32	-0.39
295	320	A	94	-34.58	-2.45	17.11	-230.18	-1.92
i	BP(j)	Nuc	#BP_Win	avgMFE	avgZ	avgED	SumZ	SumZ/#TotalWindows	BPs= 2
nt-296	-	G	120	-	-	-	-	-
296	NoBP	G	7	-41.37	-2.11	16.86	-14.8	-0.12
296	275	C	19	-46.13	-2.44	14.78	-46.32	-0.39
296	319	C	94	-34.58	-2.45	17.11	-230.18	-1.92
i	BP(j)	Nuc	#BP_Win	avgMFE	avgZ	avgED	SumZ	SumZ/#TotalWindows	BPs= 2
nt-297	-	G	120	-	-	-	-	-
297	NoBP	G	7	-36.24	-1.79	18.81	-12.5	-0.1
297	274	U	19	-46.13	-2.44	14.78	-46.32	-0.39
297	318	U	94	-34.58	-2.45	17.11	-230.18	-1.92
i	BP(j)	Nuc	#BP_Win	avgMFE	avgZ	avgED	SumZ	SumZ/#TotalWindows	BPs= 2
nt-298	-	G	120	-	-	-	-	-
298	NoBP	G	7	-31.26	-1.49	21.73	-10.4	-0.09
298	273	U	19	-46.13	-2.44	14.78	-46.32	-0.39
298	317	U	94	-34.58	-2.45	17.11	-230.18	-1.92
i	BP(j)	Nuc	#BP_Win	avgMFE	avgZ	avgED	SumZ	SumZ/#TotalWindows	BPs= 2
nt-299	-	U	120	-	-	-	-	-
299	NoBP	U	2	-49.75	-2.82	16.2	-5.64	-0.05
299	272	A	19	-46.13	-2.44	14.78	-46.32	-0.39
299	316	G	99	-33.69	-2.35	17.63	-232.41	-1.94
i	BP(j)	Nuc	#BP_Win	avgMFE	avgZ	avgED	SumZ	SumZ/#TotalWindows	BPs= 2
nt-300	-	C	120	-	-	-	-	-
300	271	G	19	-46.13	-2.44	14.78	-46.32	-0.39
300	NoBP	C	1	-49.2	-2.56	20.17	-2.56	-0.02
300	315	G	100	-33.52	-2.33	17.67	-233.18	-1.94
i	BP(j)	Nuc	#BP_Win	avgMFE	avgZ	avgED	SumZ	SumZ/#TotalWindows	BPs= 2
nt-301	-	U	120	-	-	-	-	-
301	NoBP	U	1	-49.2	-2.56	20.17	-2.56	-0.02
301	270	A	18	-45.8	-2.4	15.17	-43.24	-0.36
301	314	G	101	-33.32	-2.31	17.73	-232.84	-1.94
i	BP(j)	Nuc	#BP_Win	avgMFE	avgZ	avgED	SumZ	SumZ/#TotalWindows	BPs= 2
nt-302	-	C	120	-	-	-	-	-
302	269	G	18	-45.8	-2.4	15.17	-43.24	-0.36
302	313	G	102	-33.12	-2.28	17.78	-232.58	-1.94
i	BP(j)	Nuc	#BP_Win	avgMFE	avgZ	avgED	SumZ	SumZ/#TotalWindows	BPs= 2
nt-303	-	A	120	-	-	-	-	-
303	NoBP	A	11	-42.89	-2.46	12.74	-27.05	-0.23
303	268	U	7	-45.3	-1.99	18.3	-13.91	-0.12
303	312	U	102	-33.12	-2.28	17.78	-232.58	-1.94
i	BP(j)	Nuc	#BP_Win	avgMFE	avgZ	avgED	SumZ	SumZ/#TotalWindows	BPs= 1
nt-304	-	U	120	-	-	-	-	-
304	NoBP	U	18	-42.02	-2.14	14.59	-38.44	-0.32
304	311	A	102	-33.12	-2.28	17.78	-232.58	-1.94
i	BP(j)	Nuc	#BP_Win	avgMFE	avgZ	avgED	SumZ	SumZ/#TotalWindows	BPs= 1
nt-305	-	C	120	-	-	-	-	-
305	NoBP	C	18	-40.22	-1.98	14.1	-35.6	-0.3
305	310	G	102	-33.12	-2.28	17.78	-232.58	-1.94
i	BP(j)	Nuc	#BP_Win	avgMFE	avgZ	avgED	SumZ	SumZ/#TotalWindows	BPs= 0
nt-306	-	A	120	-	-	-	-	-
306	NoBP	A	120	-33.91	-2.22	17.16	-266.47	-2.22
i	BP(j)	Nuc	#BP_Win	avgMFE	avgZ	avgED	SumZ	SumZ/#TotalWindows	BPs= 0
nt-307	-	A	120	-	-	-	-	-
307	NoBP	A	120	-33.64	-2.2	17.1	-264.41	-2.2
i	BP(j)	Nuc	#BP_Win	avgMFE	avgZ	avgED	SumZ	SumZ/#TotalWindows	BPs= 0
nt-308	-	U	120	-	-	-	-	-
308	NoBP	U	120	-33.38	-2.18	17.04	-261.79	-2.18
i	BP(j)	Nuc	#BP_Win	avgMFE	avgZ	avgED	SumZ	SumZ/#TotalWindows	BPs= 0
nt-309	-	A	120	-	-	-	-	-
309	NoBP	A	120	-33.11	-2.16	17.01	-259.64	-2.16
i	BP(j)	Nuc	#BP_Win	avgMFE	avgZ	avgED	SumZ	SumZ/#TotalWindows	BPs= 2
nt-310	-	G	120	-	-	-	-	-
310	NoBP	G	10	-45.22	-2.46	10.13	-24.55	-0.2
310	305	C	102	-33.12	-2.28	17.78	-232.58	-1.94
310	392	C	8	-13.99	0.06	16.27	0.48	0
i	BP(j)	Nuc	#BP_Win	avgMFE	avgZ	avgED	SumZ	SumZ/#TotalWindows	BPs= 2
nt-311	-	A	120	-	-	-	-	-
311	NoBP	A	10	-41.93	-2.11	12.33	-21.06	-0.18
311	304	U	102	-33.12	-2.28	17.78	-232.58	-1.94
311	391	U	8	-13.99	0.06	16.27	0.48	0
i	BP(j)	Nuc	#BP_Win	avgMFE	avgZ	avgED	SumZ	SumZ/#TotalWindows	BPs= 2
nt-312	-	U	120	-	-	-	-	-
312	NoBP	U	10	-38.64	-1.67	14.65	-16.68	-0.14
312	303	A	102	-33.12	-2.28	17.78	-232.58	-1.94
312	390	A	8	-13.99	0.06	16.27	0.48	0
i	BP(j)	Nuc	#BP_Win	avgMFE	avgZ	avgED	SumZ	SumZ/#TotalWindows	BPs= 1
nt-313	-	G	120	-	-	-	-	-
313	NoBP	G	18	-25.88	-0.73	16.58	-13.09	-0.11
313	302	C	102	-33.12	-2.28	17.78	-232.58	-1.94
i	BP(j)	Nuc	#BP_Win	avgMFE	avgZ	avgED	SumZ	SumZ/#TotalWindows	BPs= 1
nt-314	-	G	120	-	-	-	-	-
314	NoBP	G	19	-23.49	-0.49	17.99	-9.35	-0.08
314	301	U	101	-33.32	-2.31	17.73	-232.84	-1.94
i	BP(j)	Nuc	#BP_Win	avgMFE	avgZ	avgED	SumZ	SumZ/#TotalWindows	BPs= 1
nt-315	-	G	120	-	-	-	-	-
315	NoBP	G	20	-21.36	-0.28	19.37	-5.56	-0.05
315	300	C	100	-33.52	-2.33	17.67	-233.18	-1.94
i	BP(j)	Nuc	#BP_Win	avgMFE	avgZ	avgED	SumZ	SumZ/#TotalWindows	BPs= 1
nt-316	-	G	120	-	-	-	-	-
316	NoBP	G	21	-19.6	-0.14	20.53	-3	-0.02
316	299	U	99	-33.69	-2.35	17.63	-232.41	-1.94
i	BP(j)	Nuc	#BP_Win	avgMFE	avgZ	avgED	SumZ	SumZ/#TotalWindows	BPs= 3
nt-317	-	U	120	-	-	-	-	-
317	NoBP	U	3	-43.9	-1.66	12.81	-4.97	-0.04
317	298	G	94	-34.58	-2.45	17.11	-230.18	-1.92
317	385	G	20	-14.64	0.07	22.9	1.49	0.01
317	344	A	3	-13.3	0.45	29.37	1.35	0.01
i	BP(j)	Nuc	#BP_Win	avgMFE	avgZ	avgED	SumZ	SumZ/#TotalWindows	BPs= 3
nt-318	-	U	120	-	-	-	-	-
318	NoBP	U	2	-43.5	-1.68	13.61	-3.37	-0.03
318	297	G	94	-34.58	-2.45	17.11	-230.18	-1.92
318	384	A	21	-14.6	0.12	23.25	2.62	0.02
318	343	A	3	-13.3	0.45	29.37	1.35	0.01
i	BP(j)	Nuc	#BP_Win	avgMFE	avgZ	avgED	SumZ	SumZ/#TotalWindows	BPs= 4
nt-319	-	C	120	-	-	-	-	-
319	NoBP	C	1	-43.2	-1.82	15.29	-1.82	-0.02
319	296	G	94	-34.58	-2.45	17.11	-230.18	-1.92
319	383	G	21	-14.6	0.12	23.25	2.62	0.02
319	342	G	3	-13.3	0.45	29.37	1.35	0.01
319	375	G	1	-14.2	0.76	34.78	0.76	0.01
i	BP(j)	Nuc	#BP_Win	avgMFE	avgZ	avgED	SumZ	SumZ/#TotalWindows	BPs= 3
nt-320	-	A	120	-	-	-	-	-
320	295	U	94	-34.58	-2.45	17.11	-230.18	-1.92
320	382	U	21	-14.6	0.12	23.25	2.62	0.02
320	NoBP	A	4	-13.25	0.53	29.26	2.13	0.02
320	374	U	1	-14.2	0.76	34.78	0.76	0.01
i	BP(j)	Nuc	#BP_Win	avgMFE	avgZ	avgED	SumZ	SumZ/#TotalWindows	BPs= 4
nt-321	-	G	120	-	-	-	-	-
321	294	C	93	-34.49	-2.45	17.13	-227.85	-1.9
321	381	C	21	-14.6	0.12	23.25	2.62	0.02
321	340	U	3	-13.3	0.45	29.37	1.35	0.01
321	373	C	1	-14.2	0.76	34.78	0.76	0.01
321	NoBP	G	2	-13.1	0.63	27.43	1.26	0.01
i	BP(j)	Nuc	#BP_Win	avgMFE	avgZ	avgED	SumZ	SumZ/#TotalWindows	BPs= 4
nt-322	-	U	120	-	-	-	-	-
322	293	A	91	-34.55	-2.47	17.02	-225.14	-1.88
322	NoBP	U	4	-14.48	0.28	26.69	1.14	0.01
322	380	G	21	-14.6	0.12	23.25	2.62	0.02
322	339	A	3	-13.3	0.45	29.37	1.35	0.01
322	372	G	1	-14.2	0.76	34.78	0.76	0.01
i	BP(j)	Nuc	#BP_Win	avgMFE	avgZ	avgED	SumZ	SumZ/#TotalWindows	BPs= 2
nt-323	-	G	120	-	-	-	-	-
323	292	C	89	-34.61	-2.49	16.99	-221.99	-1.85
323	NoBP	G	28	-14.72	0.13	24.09	3.57	0.03
323	338	U	3	-13.3	0.45	29.37	1.35	0.01
i	BP(j)	Nuc	#BP_Win	avgMFE	avgZ	avgED	SumZ	SumZ/#TotalWindows	BPs= 5
nt-324	-	G	120	-	-	-	-	-
324	NoBP	G	30	-16.01	-0.02	23.35	-0.61	-0.01
324	291	U	84	-34.24	-2.5	17.06	-210.39	-1.75
324	208	C	1	-46.5	-2.63	12.58	-2.63	-0.02
324	212	C	1	-44.1	-2.49	14.26	-2.49	-0.02
324	337	C	3	-13.3	0.45	29.37	1.35	0.01
324	370	U	1	-14.2	0.76	34.78	0.76	0.01
i	BP(j)	Nuc	#BP_Win	avgMFE	avgZ	avgED	SumZ	SumZ/#TotalWindows	BPs= 6
nt-325	-	G	120	-	-	-	-	-
325	NoBP	G	46	-26.77	-1.53	20.4	-70.39	-0.59
325	207	C	1	-46.5	-2.63	12.58	-2.63	-0.02
325	289	C	6	-36.23	-2.24	21.5	-13.44	-0.11
325	211	C	1	-44.1	-2.49	14.26	-2.49	-0.02
325	275	C	44	-36.56	-2.85	15.37	-125.6	-1.05
325	377	C	21	-14.6	0.12	23.25	2.62	0.02
325	369	C	1	-14.2	0.76	34.78	0.76	0.01
i	BP(j)	Nuc	#BP_Win	avgMFE	avgZ	avgED	SumZ	SumZ/#TotalWindows	BPs= 4
nt-326	-	G	120	-	-	-	-	-
326	NoBP	G	48	-26.85	-1.51	20.37	-72.42	-0.6
326	288	C	6	-36.23	-2.24	21.5	-13.44	-0.11
326	274	U	44	-36.56	-2.85	15.37	-125.6	-1.05
326	376	C	21	-14.6	0.12	23.25	2.62	0.02
326	368	U	1	-14.2	0.76	34.78	0.76	0.01
i	BP(j)	Nuc	#BP_Win	avgMFE	avgZ	avgED	SumZ	SumZ/#TotalWindows	BPs= 1
nt-327	-	A	120	-	-	-	-	-
327	NoBP	A	76	-23.6	-1.04	21.67	-79.24	-0.66
327	273	U	44	-36.56	-2.85	15.37	-125.6	-1.05
i	BP(j)	Nuc	#BP_Win	avgMFE	avgZ	avgED	SumZ	SumZ/#TotalWindows	BPs= 0
nt-328	-	A	120	-	-	-	-	-
328	NoBP	A	120	-28.08	-1.67	19.48	-200.94	-1.67
i	BP(j)	Nuc	#BP_Win	avgMFE	avgZ	avgED	SumZ	SumZ/#TotalWindows	BPs= 0
nt-329	-	A	120	-	-	-	-	-
329	NoBP	A	120	-27.8	-1.65	19.61	-197.55	-1.65
i	BP(j)	Nuc	#BP_Win	avgMFE	avgZ	avgED	SumZ	SumZ/#TotalWindows	BPs= 1
nt-330	-	A	120	-	-	-	-	-
330	NoBP	A	76	-22.3	-0.88	22.36	-67.16	-0.56
330	268	U	44	-36.56	-2.85	15.37	-125.6	-1.05
i	BP(j)	Nuc	#BP_Win	avgMFE	avgZ	avgED	SumZ	SumZ/#TotalWindows	BPs= 1
nt-331	-	A	120	-	-	-	-	-
331	NoBP	A	76	-21.93	-0.83	22.61	-63.45	-0.53
331	267	U	44	-36.56	-2.85	15.37	-125.6	-1.05
i	BP(j)	Nuc	#BP_Win	avgMFE	avgZ	avgED	SumZ	SumZ/#TotalWindows	BPs= 2
nt-332	-	A	120	-	-	-	-	-
332	NoBP	A	55	-24.28	-1.15	22.68	-63.27	-0.53
332	266	U	44	-36.56	-2.85	15.37	-125.6	-1.05
332	370	U	21	-14.6	0.12	23.25	2.62	0.02
i	BP(j)	Nuc	#BP_Win	avgMFE	avgZ	avgED	SumZ	SumZ/#TotalWindows	BPs= 4
nt-333	-	G	120	-	-	-	-	-
333	NoBP	G	44	-26.41	-1.53	21.73	-67.46	-0.56
333	265	U	44	-36.56	-2.85	15.37	-125.6	-1.05
333	369	C	21	-14.6	0.12	23.25	2.62	0.02
333	437	C	10	-13.1	0.64	27.52	6.45	0.05
333	452	C	1	-20.4	0.16	32.59	0.16	0
i	BP(j)	Nuc	#BP_Win	avgMFE	avgZ	avgED	SumZ	SumZ/#TotalWindows	BPs= 4
nt-334	-	A	120	-	-	-	-	-
334	NoBP	A	42	-26.24	-1.55	21.58	-64.98	-0.54
334	264	U	44	-36.56	-2.85	15.37	-125.6	-1.05
334	368	U	21	-14.6	0.12	23.25	2.62	0.02
334	436	U	10	-13.1	0.64	27.52	6.45	0.05
334	451	U	3	-18.63	0.66	34.23	1.97	0.02
i	BP(j)	Nuc	#BP_Win	avgMFE	avgZ	avgED	SumZ	SumZ/#TotalWindows	BPs= 6
nt-335	-	G	120	-	-	-	-	-
335	NoBP	G	65	-20.79	-0.79	22.34	-51.15	-0.43
335	263	C	44	-36.56	-2.85	15.37	-125.6	-1.05
335	382	U	2	-22.9	-0.27	29.9	-0.54	0
335	289	C	3	-25.4	-1.56	24.62	-4.67	-0.04
335	358	U	1	-14.2	0.76	34.78	0.76	0.01
335	377	C	1	-13.3	1.61	40.08	1.61	0.01
335	450	C	4	-18	0.8	33.98	3.19	0.03
i	BP(j)	Nuc	#BP_Win	avgMFE	avgZ	avgED	SumZ	SumZ/#TotalWindows	BPs= 8
nt-336	-	G	120	-	-	-	-	-
336	NoBP	G	53	-21.73	-1.02	21.43	-54.17	-0.45
336	262	C	44	-36.56	-2.85	15.37	-125.6	-1.05
336	280	C	1	-27.8	-1.25	30.05	-1.25	-0.01
336	381	C	3	-21.73	0.09	29.66	0.26	0
336	288	C	3	-25.4	-1.56	24.62	-4.67	-0.04
336	357	U	1	-14.2	0.76	34.78	0.76	0.01
336	434	U	10	-13.1	0.64	27.52	6.45	0.05
336	376	C	1	-13.3	1.61	40.08	1.61	0.01
336	449	C	4	-18	0.8	33.98	3.19	0.03
i	BP(j)	Nuc	#BP_Win	avgMFE	avgZ	avgED	SumZ	SumZ/#TotalWindows	BPs= 10
nt-337	-	C	120	-	-	-	-	-
337	261	G	44	-36.56	-2.85	15.37	-125.6	-1.05
337	279	G	1	-27.8	-1.25	30.05	-1.25	-0.01
337	NoBP	C	29	-27.02	-1.89	19.75	-54.88	-0.46
337	380	G	3	-21.73	0.09	29.66	0.26	0
337	287	G	3	-25.4	-1.56	24.62	-4.67	-0.04
337	362	G	21	-14.6	0.12	23.25	2.62	0.02
337	324	G	3	-13.3	0.45	29.37	1.35	0.01
337	356	G	1	-14.2	0.76	34.78	0.76	0.01
337	433	G	10	-13.1	0.64	27.52	6.45	0.05
337	375	G	1	-13.3	1.61	40.08	1.61	0.01
337	448	G	4	-18	0.8	33.98	3.19	0.03
i	BP(j)	Nuc	#BP_Win	avgMFE	avgZ	avgED	SumZ	SumZ/#TotalWindows	BPs= 9
nt-338	-	U	120	-	-	-	-	-
338	260	A	42	-36.57	-2.89	15.37	-121.48	-1.01
338	380	G	1	-31.3	-2.4	16.29	-2.4	-0.02
338	278	G	1	-27.8	-1.25	30.05	-1.25	-0.01
[truncated: 85,448 more rows]
