# Supplementary material for: ScanFold: an approach for genome-wide discovery of local RNA structural elements—applications to Zika virus and HIV
Source: PeerJ. 2018 Dec 18;6:e6136. doi: 10.7717/peerj.6136 (PMC6317755; doi:10.7717/peerj.6136)
Supplement: Supplemental Information 10 — A total of 37 ZIKV genomes were aligned to KJ776791.2 using the MAFFT web server (Katoh, Rozewicki & Yamada, 2017; Kuraku et al., 2013) using default settings. Aligned sequences were compared to ScanFold-Fold predicted base pairs (with z-score < −1) to tabulate the types of base pairs which are found throughout the alignment (Table S3). Column S reports the percent of canonical base pairs which were found to be allowed throughout the alignment for that base pair and column T reports the different number of canonical base pair types. [file peerj-06-6136-s010.xlsx]

## Sheet: KJ776791_ZIKV_genome.win120.stp
10807	KJ776791_ZIKV_genome.win120.stp1.rnd50.scanfold.-1.ct
1	A	0	2	0	1
2	G	1	3	0	2
3	U	2	4	0	3
4	U	3	5	70	4
5	G	4	6	69	5
6	U	5	7	68	6
7	U	6	8	67	7
8	G	7	9	66	8
9	A	8	10	65	9
10	U	9	11	64	10
11	C	10	12	62	11
12	U	11	13	61	12
13	G	12	14	60	13
14	U	13	15	59	14
15	G	14	16	0	15
16	U	15	17	0	16
17	G	16	18	0	17
18	A	17	19	0	18
19	A	18	20	0	19
20	U	19	21	44	20
21	C	20	22	43	21
22	A	21	23	42	22
23	G	22	24	41	23
24	A	23	25	40	24
25	C	24	26	39	25
26	U	25	27	38	26
27	G	26	28	0	27
28	C	27	29	37	28
29	G	28	30	36	29
30	A	29	31	35	30
31	C	30	32	0	31
32	A	31	33	0	32
33	G	32	34	0	33
34	U	33	35	0	34
35	U	34	36	30	35
36	C	35	37	29	36
37	G	36	38	28	37
38	A	37	39	26	38
39	G	38	40	25	39
40	U	39	41	24	40
41	U	40	42	23	41
42	U	41	43	22	42
43	G	42	44	21	43
44	A	43	45	20	44
45	A	44	46	54	45
46	G	45	47	53	46
47	C	46	48	52	47
48	G	47	49	0	48
49	A	48	50	0	49
50	A	49	51	0	50
51	A	50	52	0	51
52	G	51	53	47	52
53	C	52	54	46	53
54	U	53	55	45	54
55	A	54	56	0	55
56	G	55	57	0	56
57	C	56	58	0	57
58	A	57	59	0	58
59	A	58	60	14	59
60	C	59	61	13	60
61	A	60	62	12	61
62	G	61	63	11	62
63	U	62	64	0	63
64	A	63	65	10	64
65	U	64	66	9	65
66	C	65	67	8	66
67	A	66	68	7	67
68	A	67	69	6	68
69	C	68	70	5	69
70	A	69	71	4	70
71	G	70	72	117	71
72	G	71	73	116	72
73	U	72	74	115	73
74	U	73	75	114	74
75	U	74	76	113	75
76	U	75	77	112	76
77	A	76	78	0	77
78	U	77	79	111	78
79	U	78	80	110	79
80	U	79	81	0	80
81	U	80	82	108	81
82	G	81	83	107	82
83	G	82	84	106	83
84	A	83	85	0	84
85	U	84	86	0	85
86	U	85	87	105	86
87	U	86	88	104	87
88	G	87	89	103	88
89	G	88	90	102	89
90	A	89	91	101	90
91	A	90	92	100	91
92	A	91	93	99	92
93	C	92	94	98	93
94	G	93	95	0	94
95	A	94	96	0	95
96	G	95	97	0	96
97	A	96	98	0	97
98	G	97	99	93	98
99	U	98	100	92	99
100	U	99	101	91	100
101	U	100	102	90	101
102	C	101	103	89	102
103	U	102	104	88	103
104	G	103	105	87	104
105	G	104	106	86	105
106	U	105	107	83	106
107	C	106	108	82	107
108	A	107	109	81	108
109	U	108	110	0	109
110	G	109	111	79	110
111	A	110	112	78	111
112	A	111	113	76	112
113	A	112	114	75	113
114	A	113	115	74	114
115	A	114	116	73	115
116	C	115	117	72	116
117	C	116	118	71	117
118	C	117	119	0	118
119	A	118	120	0	119
120	A	119	121	0	120
121	A	120	122	0	121
122	A	121	123	0	122
123	A	122	124	0	123
124	A	123	125	0	124
125	G	124	126	149	125
126	A	125	127	148	126
127	A	126	128	146	127
128	A	127	129	145	128
129	U	128	130	144	129
130	C	129	131	143	130
131	C	130	132	142	131
132	G	131	133	141	132
133	G	132	134	140	133
134	A	133	135	139	134
135	G	134	136	0	135
136	G	135	137	0	136
137	A	136	138	0	137
138	U	137	139	0	138
139	U	138	140	134	139
140	C	139	141	133	140
141	C	140	142	132	141
142	G	141	143	131	142
143	G	142	144	130	143
144	A	143	145	129	144
145	U	144	146	128	145
146	U	145	147	127	146
147	G	146	148	0	147
148	U	147	149	126	148
149	C	148	150	125	149
150	A	149	151	0	150
151	A	150	152	0	151
152	U	151	153	0	152
153	A	152	154	0	153
154	U	153	155	0	154
155	G	154	156	0	155
156	C	155	157	0	156
157	U	156	158	0	157
158	A	157	159	0	158
159	A	158	160	0	159
160	A	159	161	0	160
161	A	160	162	178	161
162	C	161	163	177	162
163	G	162	164	176	163
164	C	163	165	175	164
165	G	164	166	174	165
166	G	165	167	173	166
167	A	166	168	0	167
168	G	167	169	0	168
169	U	168	170	0	169
170	A	169	171	0	170
171	G	170	172	0	171
172	C	171	173	0	172
173	C	172	174	166	173
174	C	173	175	165	174
175	G	174	176	164	175
176	U	175	177	163	176
177	G	176	178	162	177
178	U	177	179	161	178
179	G	178	180	196	179
180	A	179	181	195	180
181	G	180	182	194	181
182	C	181	183	193	182
183	C	182	184	192	183
184	C	183	185	191	184
185	C	184	186	190	185
186	U	185	187	0	186
187	U	186	188	0	187
188	U	187	189	0	188
189	G	188	190	0	189
190	G	189	191	185	190
191	G	190	192	184	191
192	G	191	193	183	192
193	G	192	194	182	193
194	C	193	195	181	194
195	U	194	196	180	195
196	U	195	197	179	196
197	G	196	198	0	197
198	A	197	199	0	198
199	A	198	200	266	199
200	G	199	201	265	200
201	A	200	202	0	201
202	G	201	203	263	202
203	G	202	204	262	203
204	C	203	205	261	204
205	U	204	206	260	205
206	G	205	207	259	206
207	C	206	208	0	207
208	C	207	209	0	208
209	A	208	210	0	209
210	G	209	211	253	210
211	C	210	212	252	211
212	C	211	213	251	212
213	G	212	214	250	213
214	G	213	215	248	214
215	A	214	216	247	215
216	C	215	217	246	216
217	U	216	218	245	217
218	U	217	219	242	218
219	C	218	220	241	219
220	U	219	221	240	220
221	G	220	222	239	221
222	C	221	223	0	222
223	U	222	224	237	223
224	G	223	225	236	224
225	G	224	226	235	225
226	G	225	227	234	226
227	U	226	228	233	227
228	C	227	229	232	228
229	A	228	230	0	229
230	U	229	231	0	230
231	G	230	232	0	231
232	G	231	233	228	232
233	G	232	234	227	233
234	C	233	235	226	234
235	C	234	236	225	235
236	C	235	237	224	236
237	A	236	238	223	237
238	U	237	239	0	238
239	C	238	240	221	239
240	A	239	241	220	240
241	G	240	242	219	241
242	G	241	243	218	242
243	A	242	244	0	243
244	U	243	245	0	244
245	G	244	246	217	245
246	G	245	247	216	246
247	U	246	248	215	247
248	C	247	249	214	248
249	U	248	250	0	249
250	U	249	251	213	250
251	G	250	252	212	251
252	G	251	253	211	252
253	C	252	254	210	253
254	G	253	255	0	254
255	A	254	256	0	255
256	U	255	257	0	256
257	U	256	258	0	257
258	C	257	259	0	258
259	U	258	260	206	259
260	A	259	261	205	260
261	G	260	262	204	261
262	C	261	263	203	262
263	C	262	264	202	263
264	U	263	265	0	264
265	U	264	266	200	265
266	U	265	267	199	266
267	U	266	268	0	267
268	U	267	269	0	268
269	G	268	270	0	269
270	A	269	271	0	270
271	G	270	272	0	271
272	A	271	273	0	272
273	U	272	274	0	273
274	U	273	275	326	274
275	C	274	276	325	275
276	A	275	277	0	276
277	C	276	278	0	277
278	G	277	279	289	278
279	G	278	280	288	279
280	C	279	281	287	280
281	A	280	282	0	281
282	A	281	283	0	282
283	U	282	284	0	283
284	C	283	285	0	284
285	A	284	286	0	285
286	A	285	287	0	286
287	G	286	288	280	287
288	C	287	289	279	288
289	C	288	290	278	289
290	A	289	291	0	290
291	U	290	292	324	291
292	C	291	293	323	292
293	A	292	294	322	293
294	C	293	295	321	294
295	U	294	296	320	295
296	G	295	297	319	296
297	G	296	298	318	297
298	G	297	299	317	298
299	U	298	300	316	299
300	C	299	301	315	300
301	U	300	302	314	301
302	C	301	303	313	302
303	A	302	304	312	303
304	U	303	305	311	304
305	C	304	306	310	305
306	A	305	307	0	306
307	A	306	308	0	307
308	U	307	309	0	308
309	A	308	310	0	309
310	G	309	311	305	310
311	A	310	312	304	311
312	U	311	313	303	312
313	G	312	314	302	313
314	G	313	315	301	314
315	G	314	316	300	315
316	G	315	317	299	316
317	U	316	318	298	317
318	U	317	319	297	318
319	C	318	320	296	319
320	A	319	321	295	320
321	G	320	322	294	321
322	U	321	323	293	322
323	G	322	324	292	323
324	G	323	325	291	324
325	G	324	326	275	325
326	G	325	327	274	326
327	A	326	328	0	327
328	A	327	329	0	328
329	A	328	330	0	329
330	A	329	331	0	330
331	A	330	332	0	331
332	A	331	333	0	332
333	G	332	334	0	333
334	A	333	335	0	334
335	G	334	336	0	335
336	G	335	337	0	336
337	C	336	338	0	337
338	U	337	339	0	338
339	A	338	340	0	339
340	U	339	341	0	340
341	G	340	342	0	341
342	G	341	343	0	342
343	A	342	344	0	343
344	A	343	345	0	344
345	A	344	346	0	345
346	U	345	347	0	346
347	A	346	348	0	347
348	A	347	349	0	348
349	U	348	350	0	349
350	A	349	351	0	350
351	A	350	352	0	351
352	A	351	353	0	352
353	G	352	354	0	353
354	A	353	355	0	354
355	A	354	356	370	355
356	G	355	357	369	356
357	U	356	358	0	357
358	U	357	359	367	358
359	C	358	360	366	359
360	A	359	361	0	360
361	A	360	362	0	361
362	G	361	363	0	362
363	A	362	364	0	363
364	A	363	365	0	364
365	A	364	366	0	365
366	G	365	367	359	366
367	A	366	368	358	367
368	U	367	369	0	368
369	C	368	370	356	369
370	U	369	371	355	370
371	G	370	372	0	371
372	G	371	373	0	372
373	C	372	374	0	373
374	U	373	375	0	374
375	G	374	376	0	375
376	C	375	377	0	376
377	C	376	378	0	377
378	A	377	379	0	378
379	U	378	380	0	379
380	G	379	381	0	380
381	C	380	382	0	381
382	U	381	383	0	382
383	G	382	384	0	383
384	A	383	385	0	384
385	G	384	386	0	385
386	A	385	387	0	386
387	A	386	388	0	387
388	U	387	389	0	388
389	A	388	390	0	389
390	A	389	391	0	390
391	U	390	392	0	391
392	C	391	393	0	392
393	A	392	394	0	393
394	A	393	395	0	394
395	U	394	396	0	395
396	G	395	397	0	396
397	C	396	398	0	397
398	U	397	399	0	398
399	A	398	400	0	399
400	G	399	401	0	400
401	G	400	402	0	401
402	A	401	403	0	402
403	A	402	404	0	403
404	G	403	405	0	404
405	G	404	406	0	405
406	A	405	407	0	406
407	G	406	408	0	407
408	A	407	409	0	408
409	A	408	410	0	409
410	G	409	411	0	410
411	A	410	412	0	411
412	A	411	413	0	412
413	G	412	414	0	413
414	A	413	415	0	414
415	G	414	416	0	415
416	A	415	417	0	416
417	C	416	418	0	417
418	G	417	419	0	418
419	A	418	420	0	419
420	G	419	421	0	420
421	G	420	422	0	421
422	C	421	423	0	422
423	G	422	424	0	423
424	C	423	425	0	424
425	A	424	426	0	425
426	G	425	427	0	426
427	A	426	428	0	427
428	U	427	429	0	428
429	A	428	430	0	429
430	C	429	431	0	430
431	U	430	432	0	431
432	A	431	433	0	432
433	G	432	434	529	433
434	U	433	435	528	434
435	G	434	436	527	435
436	U	435	437	526	436
437	C	436	438	525	437
438	G	437	439	524	438
439	G	438	440	0	439
440	A	439	441	0	440
441	A	440	442	0	441
442	U	441	443	520	442
443	U	442	444	519	443
444	G	443	445	518	444
445	U	444	446	517	445
446	U	445	447	516	446
447	G	446	448	482	447
448	G	447	449	481	448
449	C	448	450	480	449
450	C	449	451	479	450
451	U	450	452	478	451
452	C	451	453	477	452
453	C	452	454	476	453
454	U	453	455	0	454
455	G	454	456	475	455
456	C	455	457	474	456
457	U	456	458	473	457
458	G	457	459	472	458
459	A	458	460	0	459
460	C	459	461	471	460
461	C	460	462	470	461
462	A	461	463	469	462
463	C	462	464	0	463
464	A	463	465	0	464
465	G	464	466	0	465
466	C	465	467	0	466
467	U	466	468	0	467
468	A	467	469	0	468
469	U	468	470	462	469
470	G	469	471	461	470
471	G	470	472	460	471
472	C	471	473	458	472
473	A	472	474	457	473
474	G	473	475	456	474
475	C	474	476	455	475
476	G	475	477	453	476
477	G	476	478	452	477
478	A	477	479	451	478
479	G	478	480	450	479
480	G	479	481	449	480
481	U	480	482	448	481
482	C	481	483	447	482
483	A	482	484	0	483
484	C	483	485	493	484
485	U	484	486	492	485
486	A	485	487	491	486
487	G	486	488	0	487
488	A	487	489	0	488
489	C	488	490	0	489
490	G	489	491	0	490
491	U	490	492	486	491
492	G	491	493	485	492
493	G	492	494	484	493
494	G	493	495	514	494
495	A	494	496	513	495
496	G	495	497	512	496
497	U	496	498	511	497
498	G	497	499	510	498
499	C	498	500	509	499
500	A	499	501	508	500
501	U	500	502	507	501
502	A	501	503	506	502
503	C	502	504	0	503
504	U	503	505	0	504
505	A	504	506	0	505
506	U	505	507	502	506
507	A	506	508	501	507
508	U	507	509	500	508
509	G	508	510	499	509
510	U	509	511	498	510
511	A	510	512	497	511
512	C	511	513	496	512
513	U	512	514	495	513
514	U	513	515	494	514
515	G	514	516	0	515
516	G	515	517	446	516
517	A	516	518	445	517
518	C	517	519	444	518
519	A	518	520	443	519
520	G	519	521	442	520
521	A	520	522	0	521
522	A	521	523	0	522
523	A	522	524	0	523
524	C	523	525	438	524
525	G	524	526	437	525
526	A	525	527	436	526
527	C	526	528	435	527
528	G	527	529	434	528
529	C	528	530	433	529
530	U	529	531	0	530
531	G	530	532	0	531
532	G	531	533	0	532
533	G	532	534	0	533
534	G	533	535	0	534
535	A	534	536	0	535
536	G	535	537	0	536
537	G	536	538	544	537
538	C	537	539	0	538
539	C	538	540	0	539
540	A	539	541	0	540
541	U	540	542	0	541
542	A	541	543	0	542
543	U	542	544	0	543
544	C	543	545	537	544
545	U	544	546	0	545
546	U	545	547	0	546
547	U	546	548	0	547
548	U	547	549	0	548
549	C	548	550	0	549
550	C	549	551	0	550
551	A	550	552	0	551
552	A	551	553	0	552
553	C	552	554	0	553
554	C	553	555	0	554
555	A	554	556	0	555
556	C	555	557	0	556
557	A	556	558	0	557
558	U	557	559	0	558
559	U	558	560	0	559
560	G	559	561	0	560
561	G	560	562	0	561
562	G	561	563	0	562
563	G	562	564	0	563
564	A	563	565	0	564
565	U	564	566	0	565
566	G	565	567	0	566
567	A	566	568	0	567
568	A	567	569	0	568
569	U	568	570	0	569
570	A	569	571	0	570
571	A	570	572	0	571
572	G	571	573	0	572
573	U	572	574	0	573
574	G	573	575	0	574
575	U	574	576	0	575
576	U	575	577	0	576
577	A	576	578	0	577
578	U	577	579	0	578
579	A	578	580	0	579
580	U	579	581	0	580
581	A	580	582	0	581
582	C	581	583	0	582
583	A	582	584	0	583
584	G	583	585	0	584
585	A	584	586	0	585
586	U	585	587	0	586
587	C	586	588	0	587
588	A	587	589	0	588
589	U	588	590	0	589
590	G	589	591	0	590
591	G	590	592	0	591
592	A	591	593	0	592
593	U	592	594	0	593
594	C	593	595	0	594
595	U	594	596	0	595
596	U	595	597	0	596
597	G	596	598	0	597
598	G	597	599	0	598
599	A	598	600	0	599
600	C	599	601	0	600
601	A	600	602	0	601
602	C	601	603	0	602
603	A	602	604	0	603
604	U	603	605	0	604
605	G	604	606	0	605
606	U	605	607	0	606
607	G	606	608	0	607
608	U	607	609	0	608
609	G	608	610	0	609
610	A	609	611	0	610
611	U	610	612	0	611
612	G	611	613	0	612
613	C	612	614	0	613
614	C	613	615	0	614
615	A	614	616	0	615
616	C	615	617	0	616
617	C	616	618	0	617
618	A	617	619	0	618
619	U	618	620	0	619
620	G	619	621	0	620
621	A	620	622	0	621
622	G	621	623	0	622
623	C	622	624	0	623
624	U	623	625	0	624
625	A	624	626	0	625
626	U	625	627	0	626
627	G	626	628	0	627
628	A	627	629	0	628
629	A	628	630	0	629
630	U	629	631	0	630
631	G	630	632	0	631
632	C	631	633	0	632
633	C	632	634	0	633
634	C	633	635	0	634
635	U	634	636	0	635
636	A	635	637	0	636
637	U	636	638	0	637
638	G	637	639	0	638
639	C	638	640	0	639
640	U	639	641	0	640
641	G	640	642	0	641
642	G	641	643	0	642
643	A	642	644	0	643
644	U	643	645	0	644
645	G	644	646	0	645
646	A	645	647	0	646
647	G	646	648	0	647
648	G	647	649	0	648
649	G	648	650	0	649
650	G	649	651	0	650
651	G	650	652	0	651
652	U	651	653	0	652
653	G	652	654	0	653
654	G	653	655	0	654
655	A	654	656	0	655
656	A	655	657	0	656
657	C	656	658	0	657
658	C	657	659	0	658
659	A	658	660	0	659
660	G	659	661	0	660
661	A	660	662	0	661
662	U	661	663	0	662
663	G	662	664	0	663
664	A	663	665	0	664
665	C	664	666	0	665
666	G	665	667	0	666
667	U	666	668	0	667
668	C	667	669	0	668
669	G	668	670	0	669
670	A	669	671	0	670
671	U	670	672	0	671
672	U	671	673	0	672
673	G	672	674	0	673
674	U	673	675	0	674
675	U	674	676	0	675
676	G	675	677	0	676
677	G	676	678	0	677
678	U	677	679	0	678
679	G	678	680	0	679
680	C	679	681	0	680
681	A	680	682	0	681
682	A	681	683	0	682
683	C	682	684	0	683
684	A	683	685	0	684
685	C	684	686	0	685
686	G	685	687	0	686
687	A	686	688	0	687
688	C	687	689	0	688
689	G	688	690	0	689
690	U	689	691	0	690
691	C	690	692	0	691
692	A	691	693	0	692
693	A	692	694	0	693
694	C	693	695	0	694
695	U	694	696	0	695
696	U	695	697	0	696
697	G	696	698	0	697
698	G	697	699	0	698
699	G	698	700	0	699
700	U	699	701	0	700
701	U	700	702	0	701
702	G	701	703	0	702
703	U	702	704	0	703
704	G	703	705	0	704
705	U	704	706	0	705
706	A	705	707	0	706
707	C	706	708	0	707
708	G	707	709	0	708
709	G	708	710	0	709
710	A	709	711	0	710
711	A	710	712	0	711
712	C	711	713	0	712
713	C	712	714	0	713
714	U	713	715	0	714
715	G	714	716	0	715
716	C	715	717	0	716
717	C	716	718	0	717
718	A	717	719	0	718
719	U	718	720	0	719
720	C	719	721	0	720
721	A	720	722	0	721
722	C	721	723	0	722
723	A	722	724	0	723
724	A	723	725	0	724
725	A	724	726	0	725
726	A	725	727	0	726
727	A	726	728	0	727
728	A	727	729	0	728
729	G	728	730	0	729
730	G	729	731	0	730
731	U	730	732	0	731
732	G	731	733	0	732
733	A	732	734	0	733
734	A	733	735	0	734
735	G	734	736	0	735
736	C	735	737	0	736
737	A	736	738	0	737
738	C	737	739	0	738
739	G	738	740	0	739
740	G	739	741	0	740
741	A	740	742	0	741
742	G	741	743	0	742
743	A	742	744	0	743
744	U	743	745	0	744
745	C	744	746	0	745
746	U	745	747	0	746
747	A	746	748	0	747
748	G	747	749	0	748
749	A	748	750	0	749
750	A	749	751	0	750
751	G	750	752	0	751
752	A	751	753	0	752
753	G	752	754	0	753
754	C	753	755	0	754
755	U	754	756	0	755
756	G	755	757	0	756
757	U	756	758	0	757
758	G	757	759	0	758
759	A	758	760	0	759
760	C	759	761	0	760
761	G	760	762	0	761
762	C	761	763	0	762
763	U	762	764	0	763
764	C	763	765	0	764
765	C	764	766	0	765
766	C	765	767	0	766
767	C	766	768	0	767
768	U	767	769	0	768
769	C	768	770	0	769
770	C	769	771	0	770
771	C	770	772	0	771
772	A	771	773	0	772
773	U	772	774	0	773
774	U	773	775	0	774
775	C	774	776	0	775
776	C	775	777	0	776
777	A	776	778	0	777
778	C	777	779	0	778
779	U	778	780	0	779
780	A	779	781	0	780
781	G	780	782	0	781
782	G	781	783	0	782
783	A	782	784	0	783
784	A	783	785	0	784
785	G	784	786	0	785
786	C	785	787	0	786
787	U	786	788	0	787
788	G	787	789	0	788
789	C	788	790	0	789
790	A	789	791	0	790
791	A	790	792	0	791
792	A	791	793	0	792
793	C	792	794	0	793
794	G	793	795	0	794
795	C	794	796	0	795
796	G	795	797	0	796
797	G	796	798	0	797
798	U	797	799	0	798
799	C	798	800	0	799
800	G	799	801	0	800
801	C	800	802	0	801
802	A	801	803	0	802
803	A	802	804	0	803
804	A	803	805	0	804
805	C	804	806	0	805
806	C	805	807	0	806
807	U	806	808	0	807
808	G	807	809	0	808
809	G	808	810	0	809
810	U	809	811	0	810
811	U	810	812	0	811
812	G	811	813	0	812
813	G	812	814	0	813
814	A	813	815	0	814
815	A	814	816	0	815
816	U	815	817	0	816
817	C	816	818	0	817
818	A	817	819	0	818
819	A	818	820	0	819
820	G	819	821	0	820
821	A	820	822	0	821
822	G	821	823	0	822
823	A	822	824	0	823
824	A	823	825	0	824
825	U	824	826	0	825
826	A	825	827	0	826
827	C	826	828	0	827
828	A	827	829	0	828
829	C	828	830	0	829
830	A	829	831	0	830
831	A	830	832	0	831
832	A	831	833	0	832
833	G	832	834	0	833
834	C	833	835	0	834
835	A	834	836	0	835
836	C	835	837	0	836
837	U	836	838	0	837
838	U	837	839	0	838
839	G	838	840	0	839
840	A	839	841	0	840
841	U	840	842	0	841
842	U	841	843	0	842
843	A	842	844	0	843
844	G	843	845	0	844
845	A	844	846	0	845
846	G	845	847	0	846
847	U	846	848	0	847
848	C	847	849	0	848
849	G	848	850	0	849
850	A	849	851	0	850
851	A	850	852	0	851
852	A	851	853	0	852
853	A	852	854	0	853
854	U	853	855	0	854
855	U	854	856	0	855
856	G	855	857	0	856
857	G	856	858	0	857
858	A	857	859	0	858
859	U	858	860	0	859
860	A	859	861	0	860
861	U	860	862	0	861
862	U	861	863	0	862
863	C	862	864	0	863
864	A	863	865	0	864
865	G	864	866	0	865
866	G	865	867	0	866
867	A	866	868	0	867
868	A	867	869	0	868
869	C	868	870	0	869
870	C	869	871	0	870
871	C	870	872	0	871
872	U	871	873	0	872
873	G	872	874	0	873
874	G	873	875	0	874
875	C	874	876	0	875
876	U	875	877	0	876
877	U	876	878	0	877
878	C	877	879	0	878
879	G	878	880	0	879
880	C	879	881	0	880
881	G	880	882	0	881
882	U	881	883	0	882
883	U	882	884	0	883
884	A	883	885	0	884
885	G	884	886	0	885
886	C	885	887	0	886
887	A	886	888	0	887
888	G	887	889	0	888
889	C	888	890	0	889
890	A	889	891	0	890
891	G	890	892	0	891
892	C	891	893	0	892
893	U	892	894	0	893
894	G	893	895	0	894
895	C	894	896	0	895
896	C	895	897	0	896
897	A	896	898	0	897
898	U	897	899	0	898
899	C	898	900	0	899
900	G	899	901	0	900
901	C	900	902	0	901
902	U	901	903	0	902
903	U	902	904	0	903
904	G	903	905	0	904
905	G	904	906	0	905
906	C	905	907	0	906
907	U	906	908	0	907
908	U	907	909	0	908
909	U	908	910	0	909
910	U	909	911	0	910
911	G	910	912	0	911
912	G	911	913	0	912
913	G	912	914	0	913
914	A	913	915	0	914
915	A	914	916	0	915
916	G	915	917	0	916
917	C	916	918	0	917
918	U	917	919	0	918
919	C	918	920	0	919
920	A	919	921	0	920
921	A	920	922	0	921
922	C	921	923	0	922
923	G	922	924	0	923
924	A	923	925	0	924
925	G	924	926	0	925
926	C	925	927	0	926
927	C	926	928	0	927
928	A	927	929	0	928
929	A	928	930	0	929
930	A	929	931	0	930
931	A	930	932	0	931
932	A	931	933	0	932
933	G	932	934	0	933
934	U	933	935	0	934
935	C	934	936	0	935
936	A	935	937	0	936
937	U	936	938	0	937
938	A	937	939	0	938
939	U	938	940	0	939
940	A	939	941	0	940
941	C	940	942	0	941
942	U	941	943	0	942
943	U	942	944	0	943
944	G	943	945	0	944
945	G	944	946	0	945
946	U	945	947	0	946
947	C	946	948	0	947
948	A	947	949	0	948
949	U	948	950	0	949
950	G	949	951	0	950
951	A	950	952	0	951
952	U	951	953	0	952
953	A	952	954	0	953
954	C	953	955	0	954
955	U	954	956	0	955
956	G	955	957	0	956
957	C	956	958	0	957
958	U	957	959	0	958
959	G	958	960	0	959
960	A	959	961	0	960
961	U	960	962	0	961
962	U	961	963	0	962
963	G	962	964	0	963
964	C	963	965	0	964
965	C	964	966	0	965
966	C	965	967	0	966
967	C	966	968	0	967
968	G	967	969	0	968
969	G	968	970	0	969
970	C	969	971	0	970
971	A	970	972	0	971
972	U	971	973	0	972
973	A	972	974	0	973
974	C	973	975	0	974
975	A	974	976	0	975
976	G	975	977	0	976
977	C	976	978	0	977
978	A	977	979	0	978
979	U	978	980	0	979
980	C	979	981	0	980
981	A	980	982	0	981
982	G	981	983	0	982
983	G	982	984	0	983
984	U	983	985	0	984
985	G	984	986	0	985
986	C	985	987	0	986
987	A	986	988	0	987
988	U	987	989	0	988
989	A	988	990	0	989
990	G	989	991	0	990
991	G	990	992	0	991
992	A	991	993	0	992
993	G	992	994	0	993
994	U	993	995	0	994
995	C	994	996	0	995
996	A	995	997	0	996
997	G	996	998	0	997
998	C	997	999	0	998
999	A	998	1000	0	999
1000	A	999	1001	0	1000
1001	U	1000	1002	0	1001
1002	A	1001	1003	0	1002
1003	G	1002	1004	0	1003
1004	G	1003	1005	0	1004
1005	G	1004	1006	0	1005
1006	A	1005	1007	0	1006
1007	C	1006	1008	0	1007
1008	U	1007	1009	0	1008
1009	U	1008	1010	0	1009
1010	U	1009	1011	0	1010
1011	G	1010	1012	0	1011
1012	U	1011	1013	0	1012
1013	G	1012	1014	0	1013
1014	G	1013	1015	0	1014
1015	A	1014	1016	0	1015
1016	A	1015	1017	0	1016
1017	G	1016	1018	0	1017
1018	G	1017	1019	0	1018
1019	U	1018	1020	0	1019
1020	A	1019	1021	0	1020
1021	U	1020	1022	0	1021
1022	G	1021	1023	0	1022
1023	U	1022	1024	0	1023
1024	C	1023	1025	0	1024
1025	A	1024	1026	0	1025
1026	G	1025	1027	0	1026
1027	G	1026	1028	0	1027
1028	U	1027	1029	0	1028
1029	G	1028	1030	0	1029
1030	G	1029	1031	0	1030
1031	G	1030	1032	0	1031
1032	A	1031	1033	0	1032
1033	C	1032	1034	0	1033
1034	U	1033	1035	0	1034
1035	U	1034	1036	0	1035
1036	G	1035	1037	0	1036
1037	G	1036	1038	0	1037
1038	G	1037	1039	0	1038
1039	U	1038	1040	0	1039
1040	U	1039	1041	0	1040
1041	G	1040	1042	0	1041
1042	A	1041	1043	0	1042
1043	U	1042	1044	0	1043
1044	G	1043	1045	0	1044
1045	U	1044	1046	0	1045
1046	U	1045	1047	0	1046
1047	G	1046	1048	0	1047
1048	U	1047	1049	0	1048
1049	C	1048	1050	0	1049
1050	U	1049	1051	0	1050
1051	U	1050	1052	0	1051
1052	G	1051	1053	0	1052
1053	G	1052	1054	0	1053
1054	A	1053	1055	0	1054
1055	A	1054	1056	0	1055
1056	C	1055	1057	0	1056
1057	A	1056	1058	0	1057
1058	U	1057	1059	0	1058
1059	G	1058	1060	0	1059
1060	G	1059	1061	0	1060
1061	A	1060	1062	0	1061
1062	G	1061	1063	0	1062
1063	G	1062	1064	0	1063
1064	U	1063	1065	0	1064
1065	U	1064	1066	0	1065
1066	G	1065	1067	0	1066
1067	U	1066	1068	0	1067
1068	G	1067	1069	0	1068
1069	U	1068	1070	0	1069
1070	C	1069	1071	0	1070
1071	A	1070	1072	0	1071
1072	C	1071	1073	0	1072
1073	C	1072	1074	0	1073
1074	G	1073	1075	0	1074
1075	U	1074	1076	0	1075
1076	A	1075	1077	0	1076
1077	A	1076	1078	0	1077
1078	U	1077	1079	0	1078
1079	G	1078	1080	0	1079
1080	G	1079	1081	0	1080
1081	C	1080	1082	0	1081
1082	A	1081	1083	0	1082
1083	C	1082	1084	0	1083
1084	A	1083	1085	0	1084
1085	G	1084	1086	0	1085
1086	G	1085	1087	0	1086
1087	A	1086	1088	0	1087
1088	C	1087	1089	0	1088
1089	A	1088	1090	0	1089
1090	A	1089	1091	0	1090
1091	A	1090	1092	0	1091
1092	C	1091	1093	0	1092
1093	C	1092	1094	0	1093
1094	G	1093	1095	0	1094
1095	A	1094	1096	0	1095
1096	C	1095	1097	0	1096
1097	U	1096	1098	0	1097
1098	G	1097	1099	0	1098
1099	U	1098	1100	0	1099
1100	C	1099	1101	0	1100
1101	G	1100	1102	0	1101
1102	A	1101	1103	0	1102
1103	C	1102	1104	0	1103
1104	A	1103	1105	0	1104
1105	U	1104	1106	0	1105
1106	A	1105	1107	0	1106
1107	G	1106	1108	0	1107
1108	A	1107	1109	0	1108
1109	G	1108	1110	1126	1109
1110	C	1109	1111	1125	1110
1111	U	1110	1112	1124	1111
1112	G	1111	1113	1123	1112
1113	G	1112	1114	0	1113
1114	U	1113	1115	0	1114
1115	U	1114	1116	0	1115
1116	A	1115	1117	0	1116
1117	C	1116	1118	0	1117
1118	A	1117	1119	0	1118
1119	A	1118	1120	0	1119
1120	C	1119	1121	0	1120
1121	A	1120	1122	0	1121
1122	A	1121	1123	0	1122
1123	C	1122	1124	1112	1123
1124	A	1123	1125	1111	1124
1125	G	1124	1126	1110	1125
1126	U	1125	1127	1109	1126
1127	C	1126	1128	0	1127
1128	A	1127	1129	0	1128
1129	G	1128	1130	1165	1129
1130	C	1129	1131	1164	1130
1131	A	1130	1132	0	1131
1132	A	1131	1133	0	1132
1133	C	1132	1134	1161	1133
1134	A	1133	1135	1160	1134
1135	U	1134	1136	1159	1135
1136	G	1135	1137	1158	1136
1137	G	1136	1138	1157	1137
1138	C	1137	1139	1156	1138
1139	G	1138	1140	1155	1139
1140	G	1139	1141	1154	1140
1141	A	1140	1142	1152	1141
1142	G	1141	1143	1151	1142
1143	G	1142	1144	1150	1143
1144	U	1143	1145	0	1144
1145	A	1144	1146	0	1145
1146	A	1145	1147	0	1146
1147	G	1146	1148	0	1147
1148	A	1147	1149	0	1148
1149	U	1148	1150	0	1149
1150	C	1149	1151	1143	1150
1151	C	1150	1152	1142	1151
1152	U	1151	1153	1141	1152
1153	A	1152	1154	0	1153
1154	C	1153	1155	1140	1154
1155	U	1154	1156	1139	1155
1156	G	1155	1157	1138	1156
1157	C	1156	1158	1137	1157
1158	U	1157	1159	1136	1158
1159	A	1158	1160	1135	1159
1160	U	1159	1161	1134	1160
1161	G	1160	1162	1133	1161
1162	A	1161	1163	0	1162
1163	G	1162	1164	0	1163
1164	G	1163	1165	1130	1164
1165	C	1164	1166	1129	1165
1166	A	1165	1167	0	1166
1167	U	1166	1168	0	1167
1168	C	1167	1169	0	1168
1169	A	1168	1170	0	1169
1170	A	1169	1171	0	1170
1171	U	1170	1172	0	1171
1172	A	1171	1173	0	1172
1173	U	1172	1174	0	1173
1174	C	1173	1175	0	1174
1175	G	1174	1176	1201	1175
1176	G	1175	1177	1200	1176
1177	A	1176	1178	0	1177
1178	C	1177	1179	1198	1178
1179	A	1178	1180	1197	1179
1180	U	1179	1181	1195	1180
1181	G	1180	1182	1194	1181
1182	G	1181	1183	1193	1182
1183	C	1182	1184	1192	1183
1184	U	1183	1185	1191	1184
1185	U	1184	1186	0	1185
1186	C	1185	1187	0	1186
1187	G	1186	1188	0	1187
1188	G	1187	1189	0	1188
1189	A	1188	1190	0	1189
1190	C	1189	1191	0	1190
1191	A	1190	1192	1184	1191
1192	G	1191	1193	1183	1192
1193	C	1192	1194	1182	1193
1194	C	1193	1195	1181	1194
1195	G	1194	1196	1180	1195
1196	C	1195	1197	0	1196
1197	U	1196	1198	1179	1197
1198	G	1197	1199	1178	1198
1199	C	1198	1200	0	1199
1200	C	1199	1201	1176	1200
1201	C	1200	1202	1175	1201
1202	A	1201	1203	0	1202
1203	A	1202	1204	0	1203
1204	C	1203	1205	0	1204
1205	A	1204	1206	0	1205
1206	C	1205	1207	1224	1206
1207	A	1206	1208	1223	1207
1208	A	1207	1209	1222	1208
1209	G	1208	1210	1221	1209
1210	G	1209	1211	1220	1210
1211	U	1210	1212	1219	1211
1212	G	1211	1213	1218	1212
1213	A	1212	1214	0	1213
1214	A	1213	1215	0	1214
1215	G	1214	1216	0	1215
1216	C	1215	1217	0	1216
1217	C	1216	1218	0	1217
1218	U	1217	1219	1212	1218
1219	A	1218	1220	1211	1219
1220	C	1219	1221	1210	1220
1221	C	1220	1222	1209	1221
1222	U	1221	1223	1208	1222
1223	U	1222	1224	1207	1223
1224	G	1223	1225	1206	1224
1225	A	1224	1226	0	1225
1226	C	1225	1227	0	1226
1227	A	1226	1228	0	1227
1228	A	1227	1229	0	1228
1229	G	1228	1230	0	1229
1230	C	1229	1231	0	1230
1231	A	1230	1232	0	1231
1232	A	1231	1233	0	1232
1233	U	1232	1234	0	1233
1234	C	1233	1235	0	1234
1235	A	1234	1236	0	1235
1236	G	1235	1237	0	1236
1237	A	1236	1238	0	1237
1238	C	1237	1239	0	1238
1239	A	1238	1240	0	1239
1240	C	1239	1241	0	1240
1241	U	1240	1242	0	1241
1242	C	1241	1243	0	1242
1243	A	1242	1244	0	1243
1244	A	1243	1245	0	1244
1245	U	1244	1246	0	1245
1246	A	1245	1247	0	1246
1247	U	1246	1248	0	1247
1248	G	1247	1249	0	1248
1249	U	1248	1250	0	1249
1250	C	1249	1251	0	1250
1251	U	1250	1252	0	1251
1252	G	1251	1253	0	1252
1253	C	1252	1254	0	1253
1254	A	1253	1255	0	1254
1255	A	1254	1256	0	1255
1256	A	1255	1257	0	1256
1257	A	1256	1258	0	1257
1258	G	1257	1259	0	1258
1259	A	1258	1260	0	1259
1260	A	1259	1261	0	1260
1261	C	1260	1262	0	1261
1262	G	1261	1263	0	1262
1263	U	1262	1264	0	1263
1264	U	1263	1265	0	1264
1265	A	1264	1266	0	1265
1266	G	1265	1267	0	1266
1267	U	1266	1268	0	1267
1268	G	1267	1269	0	1268
1269	G	1268	1270	0	1269
1270	A	1269	1271	0	1270
1271	C	1270	1272	0	1271
1272	A	1271	1273	0	1272
1273	G	1272	1274	0	1273
1274	A	1273	1275	0	1274
1275	G	1274	1276	0	1275
1276	G	1275	1277	0	1276
1277	C	1276	1278	0	1277
1278	U	1277	1279	0	1278
1279	G	1278	1280	0	1279
1280	G	1279	1281	0	1280
1281	G	1280	1282	1372	1281
1282	G	1281	1283	0	1282
1283	A	1282	1284	0	1283
1284	A	1283	1285	0	1284
1285	A	1284	1286	0	1285
1286	U	1285	1287	1369	1286
1287	G	1286	1288	1368	1287
1288	G	1287	1289	1367	1288
1289	A	1288	1290	1366	1289
1290	U	1289	1291	1365	1290
1291	G	1290	1292	1364	1291
1292	U	1291	1293	1363	1292
1293	G	1292	1294	0	1293
1294	G	1293	1295	0	1294
1295	A	1294	1296	0	1295
1296	C	1295	1297	1361	1296
1297	U	1296	1298	1360	1297
1298	U	1297	1299	1359	1298
1299	U	1298	1300	1358	1299
1300	U	1299	1301	1357	1300
1301	U	1300	1302	1356	1301
1302	G	1301	1303	1355	1302
1303	G	1302	1304	1354	1303
1304	C	1303	1305	1352	1304
1305	A	1304	1306	1351	1305
1306	A	1305	1307	0	1306
1307	A	1306	1308	0	1307
1308	G	1307	1309	0	1308
1309	G	1308	1310	1343	1309
1310	G	1309	1311	1342	1310
1311	A	1310	1312	1341	1311
1312	G	1311	1313	1340	1312
1313	C	1312	1314	1339	1313
1314	C	1313	1315	0	1314
1315	U	1314	1316	0	1315
1316	G	1315	1317	0	1316
1317	G	1316	1318	1338	1317
1318	U	1317	1319	1337	1318
1319	G	1318	1320	1336	1319
1320	A	1319	1321	0	1320
1321	C	1320	1322	1335	1321
1322	A	1321	1323	1334	1322
1323	U	1322	1324	0	1323
1324	G	1323	1325	1332	1324
1325	C	1324	1326	1331	1325
1326	G	1325	1327	0	1326
1327	C	1326	1328	0	1327
1328	U	1327	1329	0	1328
1329	A	1328	1330	0	1329
1330	A	1329	1331	0	1330
1331	G	1330	1332	1325	1331
1332	U	1331	1333	1324	1332
1333	U	1332	1334	0	1333
1334	U	1333	1335	1322	1334
1335	G	1334	1336	1321	1335
1336	C	1335	1337	1319	1336
1337	A	1336	1338	1318	1337
1338	U	1337	1339	1317	1338
1339	G	1338	1340	1313	1339
1340	C	1339	1341	1312	1340
1341	U	1340	1342	1311	1341
1342	C	1341	1343	1310	1342
1343	C	1342	1344	1309	1343
1344	A	1343	1345	0	1344
1345	A	1344	1346	0	1345
1346	G	1345	1347	0	1346
1347	A	1346	1348	0	1347
1348	A	1347	1349	0	1348
1349	A	1348	1350	0	1349
1350	A	1349	1351	0	1350
1351	U	1350	1352	1305	1351
1352	G	1351	1353	1304	1352
1353	A	1352	1354	0	1353
1354	C	1353	1355	1303	1354
1355	C	1354	1356	1302	1355
1356	G	1355	1357	1301	1356
1357	G	1356	1358	1300	1357
1358	G	1357	1359	1299	1358
1359	A	1358	1360	1298	1359
1360	A	1359	1361	1297	1360
1361	G	1360	1362	1296	1361
1362	A	1361	1363	0	1362
1363	G	1362	1364	1292	1363
1364	C	1363	1365	1291	1364
1365	A	1364	1366	1290	1365
1366	U	1365	1367	1289	1366
1367	C	1366	1368	1288	1367
1368	C	1367	1369	1287	1368
1369	A	1368	1370	1286	1369
1370	G	1369	1371	0	1370
1371	C	1370	1372	0	1371
1372	C	1371	1373	1281	1372
1373	A	1372	1374	0	1373
1374	G	1373	1375	0	1374
1375	A	1374	1376	0	1375
1376	G	1375	1377	0	1376
1377	A	1376	1378	0	1377
1378	A	1377	1379	0	1378
1379	U	1378	1380	0	1379
1380	C	1379	1381	0	1380
1381	U	1380	1382	0	1381
1382	G	1381	1383	0	1382
1383	G	1382	1384	0	1383
1384	A	1383	1385	0	1384
1385	G	1384	1386	0	1385
1386	U	1385	1387	0	1386
1387	A	1386	1388	0	1387
1388	C	1387	1389	0	1388
1389	C	1388	1390	0	1389
1390	G	1389	1391	0	1390
1391	G	1390	1392	0	1391
1392	A	1391	1393	0	1392
1393	U	1392	1394	0	1393
1394	A	1393	1395	0	1394
1395	A	1394	1396	0	1395
1396	U	1395	1397	0	1396
1397	G	1396	1398	0	1397
1398	C	1397	1399	0	1398
1399	U	1398	1400	0	1399
1400	G	1399	1401	0	1400
1401	U	1400	1402	0	1401
1402	C	1401	1403	0	1402
1403	A	1402	1404	0	1403
1404	G	1403	1405	0	1404
1405	U	1404	1406	0	1405
1406	U	1405	1407	0	1406
1407	C	1406	1408	0	1407
1408	A	1407	1409	0	1408
1409	U	1408	1410	0	1409
1410	G	1409	1411	0	1410
1411	G	1410	1412	0	1411
1412	C	1411	1413	0	1412
1413	U	1412	1414	0	1413
1414	C	1413	1415	0	1414
1415	C	1414	1416	0	1415
1416	C	1415	1417	0	1416
1417	A	1416	1418	0	1417
1418	G	1417	1419	0	1418
1419	C	1418	1420	0	1419
1420	A	1419	1421	0	1420
1421	C	1420	1422	0	1421
1422	A	1421	1423	0	1422
1423	G	1422	1424	0	1423
1424	U	1423	1425	0	1424
1425	G	1424	1426	0	1425
1426	G	1425	1427	0	1426
1427	G	1426	1428	0	1427
1428	A	1427	1429	0	1428
1429	U	1428	1430	0	1429
1430	G	1429	1431	0	1430
1431	A	1430	1432	0	1431
1432	U	1431	1433	0	1432
1433	C	1432	1434	0	1433
1434	G	1433	1435	0	1434
1435	U	1434	1436	0	1435
1436	U	1435	1437	0	1436
1437	A	1436	1438	0	1437
1438	A	1437	1439	0	1438
1439	U	1438	1440	0	1439
1440	G	1439	1441	0	1440
1441	A	1440	1442	0	1441
1442	C	1441	1443	0	1442
1443	A	1442	1444	0	1443
1444	C	1443	1445	0	1444
1445	A	1444	1446	0	1445
1446	G	1445	1447	0	1446
1447	G	1446	1448	0	1447
1448	A	1447	1449	0	1448
1449	C	1448	1450	0	1449
1450	A	1449	1451	0	1450
1451	U	1450	1452	0	1451
1452	G	1451	1453	0	1452
1453	A	1452	1454	0	1453
1454	A	1453	1455	0	1454
1455	A	1454	1456	0	1455
1456	C	1455	1457	0	1456
1457	U	1456	1458	0	1457
1458	G	1457	1459	0	1458
1459	A	1458	1460	0	1459
1460	U	1459	1461	0	1460
1461	G	1460	1462	0	1461
1462	A	1461	1463	0	1462
1463	G	1462	1464	0	1463
1464	A	1463	1465	0	1464
1465	A	1464	1466	0	1465
1466	U	1465	1467	0	1466
1467	A	1466	1468	0	1467
1468	G	1467	1469	0	1468
1469	A	1468	1470	0	1469
1470	G	1469	1471	0	1470
1471	C	1470	1472	0	1471
1472	G	1471	1473	0	1472
1473	A	1472	1474	0	1473
1474	A	1473	1475	0	1474
1475	G	1474	1476	0	1475
1476	G	1475	1477	0	1476
1477	U	1476	1478	0	1477
1478	U	1477	1479	0	1478
1479	G	1478	1480	0	1479
1480	A	1479	1481	0	1480
1481	G	1480	1482	0	1481
1482	A	1481	1483	0	1482
1483	U	1482	1484	0	1483
1484	A	1483	1485	0	1484
1485	A	1484	1486	0	1485
1486	C	1485	1487	0	1486
1487	G	1486	1488	0	1487
1488	C	1487	1489	0	1488
1489	C	1488	1490	0	1489
1490	C	1489	1491	0	1490
1491	A	1490	1492	0	1491
1492	A	1491	1493	0	1492
1493	U	1492	1494	0	1493
1494	U	1493	1495	0	1494
1495	C	1494	1496	0	1495
1496	A	1495	1497	0	1496
1497	C	1496	1498	0	1497
1498	C	1497	1499	0	1498
1499	A	1498	1500	0	1499
1500	A	1499	1501	0	1500
1501	G	1500	1502	0	1501
1502	A	1501	1503	0	1502
1503	G	1502	1504	0	1503
1504	C	1503	1505	0	1504
1505	C	1504	1506	0	1505
1506	G	1505	1507	0	1506
1507	A	1506	1508	0	1507
1508	A	1507	1509	0	1508
1509	G	1508	1510	0	1509
1510	C	1509	1511	0	1510
1511	C	1510	1512	0	1511
1512	A	1511	1513	0	1512
1513	C	1512	1514	0	1513
1514	C	1513	1515	0	1514
1515	C	1514	1516	0	1515
1516	U	1515	1517	1535	1516
1517	G	1516	1518	0	1517
1518	G	1517	1519	0	1518
1519	G	1518	1520	0	1519
1520	G	1519	1521	0	1520
1521	G	1520	1522	0	1521
1522	G	1521	1523	0	1522
1523	U	1522	1524	0	1523
1524	U	1523	1525	0	1524
1525	U	1524	1526	0	1525
1526	U	1525	1527	1633	1526
1527	G	1526	1528	1632	1527
1528	G	1527	1529	1631	1528
1529	A	1528	1530	1630	1529
1530	A	1529	1531	1629	1530
1531	G	1530	1532	0	1531
1532	C	1531	1533	0	1532
1533	C	1532	1534	0	1533
1534	U	1533	1535	0	1534
1535	A	1534	1536	1516	1535
1536	G	1535	1537	0	1536
1537	G	1536	1538	0	1537
1538	A	1537	1539	1626	1538
1539	C	1538	1540	1625	1539
1540	U	1539	1541	1624	1540
1541	U	1540	1542	1623	1541
1542	G	1541	1543	0	1542
1543	A	1542	1544	0	1543
1544	U	1543	1545	1621	1544
1545	U	1544	1546	1620	1545
1546	G	1545	1547	1619	1546
1547	U	1546	1548	1618	1547
1548	G	1547	1549	1617	1548
1549	A	1548	1550	1616	1549
1550	A	1549	1551	1615	1550
1551	C	1550	1552	1614	1551
1552	C	1551	1553	1613	1552
1553	G	1552	1554	1612	1553
1554	A	1553	1555	1611	1554
1555	G	1554	1556	0	1555
1556	G	1555	1557	0	1556
1557	A	1556	1558	0	1557
1558	C	1557	1559	0	1558
1559	A	1558	1560	0	1559
1560	G	1559	1561	0	1560
1561	G	1560	1562	0	1561
1562	C	1561	1563	0	1562
1563	C	1562	1564	0	1563
1564	U	1563	1565	0	1564
1565	U	1564	1566	0	1565
1566	G	1565	1567	0	1566
1567	A	1566	1568	0	1567
1568	C	1567	1569	0	1568
1569	U	1568	1570	0	1569
1570	U	1569	1571	0	1570
1571	U	1570	1572	0	1571
1572	U	1571	1573	0	1572
1573	C	1572	1574	0	1573
1574	A	1573	1575	0	1574
1575	G	1574	1576	0	1575
1576	A	1575	1577	0	1576
1577	U	1576	1578	0	1577
1578	U	1577	1579	0	1578
1579	U	1578	1580	0	1579
1580	G	1579	1581	0	1580
1581	U	1580	1582	0	1581
1582	A	1581	1583	0	1582
1583	U	1582	1584	0	1583
1584	U	1583	1585	0	1584
1585	A	1584	1586	0	1585
1586	C	1585	1587	0	1586
1587	U	1586	1588	0	1587
1588	U	1587	1589	0	1588
1589	G	1588	1590	0	1589
1590	A	1589	1591	0	1590
1591	C	1590	1592	0	1591
1592	U	1591	1593	0	1592
1593	A	1592	1594	0	1593
1594	U	1593	1595	0	1594
1595	G	1594	1596	0	1595
1596	A	1595	1597	0	1596
1597	A	1596	1598	0	1597
1598	U	1597	1599	0	1598
1599	A	1598	1600	0	1599
1600	A	1599	1601	0	1600
1601	C	1600	1602	0	1601
1602	A	1601	1603	0	1602
1603	A	1602	1604	0	1603
1604	G	1603	1605	0	1604
1605	C	1604	1606	0	1605
1606	A	1605	1607	0	1606
1607	C	1606	1608	0	1607
1608	U	1607	1609	0	1608
1609	G	1608	1610	0	1609
1610	G	1609	1611	0	1610
1611	U	1610	1612	1554	1611
1612	U	1611	1613	1553	1612
1613	G	1612	1614	1552	1613
1614	G	1613	1615	1551	1614
1615	U	1614	1616	1550	1615
1616	U	1615	1617	1549	1616
1617	C	1616	1618	1548	1617
1618	A	1617	1619	1547	1618
1619	C	1618	1620	1546	1619
1620	A	1619	1621	1545	1620
1621	A	1620	1622	1544	1621
1622	G	1621	1623	0	1622
1623	G	1622	1624	1541	1623
1624	A	1623	1625	1540	1624
1625	G	1624	1626	1539	1625
1626	U	1625	1627	1538	1626
1627	G	1626	1628	0	1627
1628	G	1627	1629	0	1628
1629	U	1628	1630	1530	1629
1630	U	1629	1631	1529	1630
1631	C	1630	1632	1528	1631
1632	C	1631	1633	1527	1632
1633	A	1632	1634	1526	1633
1634	C	1633	1635	0	1634
1635	G	1634	1636	0	1635
1636	A	1635	1637	0	1636
1637	C	1636	1638	0	1637
1638	A	1637	1639	0	1638
1639	U	1638	1640	0	1639
1640	U	1639	1641	0	1640
1641	C	1640	1642	0	1641
1642	C	1641	1643	0	1642
1643	A	1642	1644	0	1643
1644	U	1643	1645	0	1644
1645	U	1644	1646	0	1645
1646	A	1645	1647	0	1646
1647	C	1646	1648	0	1647
1648	C	1647	1649	0	1648
1649	U	1648	1650	0	1649
1650	U	1649	1651	0	1650
1651	G	1650	1652	0	1651
1652	G	1651	1653	0	1652
1653	C	1652	1654	0	1653
1654	A	1653	1655	0	1654
1655	C	1654	1656	0	1655
1656	G	1655	1657	0	1656
1657	C	1656	1658	0	1657
1658	U	1657	1659	0	1658
1659	G	1658	1660	0	1659
1660	G	1659	1661	0	1660
1661	G	1660	1662	0	1661
1662	G	1661	1663	0	1662
1663	C	1662	1664	0	1663
1664	A	1663	1665	0	1664
1665	G	1664	1666	0	1665
1666	A	1665	1667	0	1666
1667	C	1666	1668	0	1667
1668	A	1667	1669	0	1668
1669	C	1668	1670	0	1669
1670	C	1669	1671	0	1670
1671	G	1670	1672	0	1671
1672	G	1671	1673	0	1672
1673	A	1672	1674	0	1673
1674	A	1673	1675	0	1674
1675	C	1674	1676	0	1675
1676	U	1675	1677	0	1676
1677	C	1676	1678	0	1677
1678	C	1677	1679	0	1678
1679	A	1678	1680	0	1679
1680	C	1679	1681	0	1680
1681	A	1680	1682	0	1681
1682	C	1681	1683	0	1682
1683	U	1682	1684	0	1683
1684	G	1683	1685	0	1684
1685	G	1684	1686	0	1685
1686	A	1685	1687	0	1686
1687	A	1686	1688	0	1687
1688	C	1687	1689	0	1688
1689	A	1688	1690	0	1689
1690	A	1689	1691	0	1690
1691	C	1690	1692	0	1691
1692	A	1691	1693	0	1692
1693	A	1692	1694	0	1693
1694	A	1693	1695	0	1694
1695	G	1694	1696	0	1695
1696	A	1695	1697	0	1696
1697	A	1696	1698	0	1697
1698	G	1697	1699	0	1698
1699	C	1698	1700	0	1699
1700	A	1699	1701	0	1700
1701	C	1700	1702	0	1701
1702	U	1701	1703	0	1702
1703	G	1702	1704	0	1703
1704	G	1703	1705	0	1704
1705	U	1704	1706	0	1705
1706	A	1705	1707	0	1706
1707	G	1706	1708	0	1707
1708	A	1707	1709	0	1708
1709	G	1708	1710	0	1709
1710	U	1709	1711	0	1710
1711	U	1710	1712	0	1711
1712	C	1711	1713	0	1712
1713	A	1712	1714	0	1713
1714	A	1713	1715	0	1714
1715	G	1714	1716	0	1715
1716	G	1715	1717	0	1716
1717	A	1716	1718	0	1717
1718	C	1717	1719	0	1718
1719	G	1718	1720	1742	1719
1720	C	1719	1721	0	1720
1721	A	1720	1722	0	1721
1722	C	1721	1723	0	1722
1723	A	1722	1724	0	1723
1724	U	1723	1725	0	1724
1725	G	1724	1726	0	1725
1726	C	1725	1727	0	1726
1727	C	1726	1728	0	1727
1728	A	1727	1729	0	1728
1729	A	1728	1730	0	1729
1730	A	1729	1731	0	1730
1731	A	1730	1732	0	1731
1732	G	1731	1733	0	1732
1733	G	1732	1734	0	1733
1734	C	1733	1735	0	1734
1735	A	1734	1736	0	1735
1736	A	1735	1737	0	1736
1737	A	1736	1738	0	1737
1738	C	1737	1739	0	1738
1739	U	1738	1740	0	1739
1740	G	1739	1741	0	1740
1741	U	1740	1742	0	1741
1742	C	1741	1743	1719	1742
1743	G	1742	1744	0	1743
1744	U	1743	1745	0	1744
1745	G	1744	1746	0	1745
1746	G	1745	1747	0	1746
1747	U	1746	1748	0	1747
1748	U	1747	1749	0	1748
1749	C	1748	1750	0	1749
1750	U	1749	1751	0	1750
1751	A	1750	1752	0	1751
1752	G	1751	1753	0	1752
1753	G	1752	1754	0	1753
1754	G	1753	1755	0	1754
1755	A	1754	1756	0	1755
1756	G	1755	1757	0	1756
1757	U	1756	1758	0	1757
1758	C	1757	1759	0	1758
1759	A	1758	1760	0	1759
1760	A	1759	1761	0	1760
1761	G	1760	1762	0	1761
1762	A	1761	1763	0	1762
1763	A	1762	1764	0	1763
1764	G	1763	1765	0	1764
1765	G	1764	1766	0	1765
1766	A	1765	1767	0	1766
1767	G	1766	1768	0	1767
1768	C	1767	1769	0	1768
1769	A	1768	1770	0	1769
1770	G	1769	1771	0	1770
1771	U	1770	1772	0	1771
1772	U	1771	1773	0	1772
1773	C	1772	1774	0	1773
1774	A	1773	1775	0	1774
1775	C	1774	1776	0	1775
1776	A	1775	1777	0	1776
1777	C	1776	1778	0	1777
1778	G	1777	1779	0	1778
1779	G	1778	1780	0	1779
1780	C	1779	1781	0	1780
1781	C	1780	1782	0	1781
1782	C	1781	1783	0	1782
1783	U	1782	1784	0	1783
1784	U	1783	1785	0	1784
1785	G	1784	1786	0	1785
1786	C	1785	1787	0	1786
1787	U	1786	1788	0	1787
1788	G	1787	1789	0	1788
1789	G	1788	1790	0	1789
1790	A	1789	1791	0	1790
1791	G	1790	1792	0	1791
1792	C	1791	1793	0	1792
1793	U	1792	1794	0	1793
1794	C	1793	1795	0	1794
1795	U	1794	1796	0	1795
1796	G	1795	1797	0	1796
1797	G	1796	1798	0	1797
1798	A	1797	1799	0	1798
1799	G	1798	1800	0	1799
1800	G	1799	1801	0	1800
1801	C	1800	1802	0	1801
1802	U	1801	1803	0	1802
1803	G	1802	1804	0	1803
1804	A	1803	1805	0	1804
1805	G	1804	1806	0	1805
1806	A	1805	1807	0	1806
1807	U	1806	1808	0	1807
1808	G	1807	1809	0	1808
1809	G	1808	1810	0	1809
1810	A	1809	1811	0	1810
1811	U	1810	1812	0	1811
1812	G	1811	1813	0	1812
1813	G	1812	1814	0	1813
1814	U	1813	1815	0	1814
1815	G	1814	1816	0	1815
1816	C	1815	1817	0	1816
1817	A	1816	1818	0	1817
1818	A	1817	1819	0	1818
1819	A	1818	1820	0	1819
1820	G	1819	1821	0	1820
1821	G	1820	1822	0	1821
1822	G	1821	1823	0	1822
1823	A	1822	1824	0	1823
1824	A	1823	1825	0	1824
1825	G	1824	1826	0	1825
1826	G	1825	1827	0	1826
1827	C	1826	1828	0	1827
1828	U	1827	1829	0	1828
1829	G	1828	1830	0	1829
1830	U	1829	1831	0	1830
1831	C	1830	1832	0	1831
1832	C	1831	1833	0	1832
1833	U	1832	1834	0	1833
1834	C	1833	1835	0	1834
1835	U	1834	1836	0	1835
1836	G	1835	1837	0	1836
1837	G	1836	1838	0	1837
1838	C	1837	1839	0	1838
1839	C	1838	1840	0	1839
1840	A	1839	1841	0	1840
1841	C	1840	1842	0	1841
1842	U	1841	1843	0	1842
1843	U	1842	1844	0	1843
1844	G	1843	1845	0	1844
1845	A	1844	1846	0	1845
1846	A	1845	1847	0	1846
1847	A	1846	1848	0	1847
1848	U	1847	1849	0	1848
1849	G	1848	1850	0	1849
1850	U	1849	1851	0	1850
1851	C	1850	1852	0	1851
1852	G	1851	1853	0	1852
1853	C	1852	1854	0	1853
1854	C	1853	1855	0	1854
1855	U	1854	1856	0	1855
1856	G	1855	1857	0	1856
1857	A	1856	1858	0	1857
1858	A	1857	1859	0	1858
1859	A	1858	1860	0	1859
1860	A	1859	1861	0	1860
1861	U	1860	1862	0	1861
1862	G	1861	1863	0	1862
1863	G	1862	1864	0	1863
1864	A	1863	1865	0	1864
1865	U	1864	1866	0	1865
1866	A	1865	1867	0	1866
1867	A	1866	1868	0	1867
1868	A	1867	1869	0	1868
1869	C	1868	1870	0	1869
1870	U	1869	1871	0	1870
1871	U	1870	1872	0	1871
1872	A	1871	1873	0	1872
1873	G	1872	1874	0	1873
1874	A	1873	1875	0	1874
1875	U	1874	1876	0	1875
1876	U	1875	1877	0	1876
1877	G	1876	1878	0	1877
1878	A	1877	1879	0	1878
1879	A	1878	1880	1992	1879
1880	G	1879	1881	1991	1880
1881	G	1880	1882	1990	1881
1882	G	1881	1883	1989	1882
1883	C	1882	1884	0	1883
1884	G	1883	1885	0	1884
1885	U	1884	1886	1986	1885
1886	G	1885	1887	1985	1886
1887	U	1886	1888	1984	1887
1888	C	1887	1889	0	1888
1889	A	1888	1890	0	1889
1890	U	1889	1891	0	1890
1891	A	1890	1892	0	1891
1892	C	1891	1893	0	1892
1893	U	1892	1894	1980	1893
1894	C	1893	1895	1979	1894
1895	C	1894	1896	1978	1895
1896	U	1895	1897	1977	1896
1897	U	1896	1898	1976	1897
1898	G	1897	1899	1975	1898
1899	U	1898	1900	1974	1899
1900	G	1899	1901	1973	1900
1901	U	1900	1902	1972	1901
1902	A	1901	1903	1971	1902
1903	C	1902	1904	1970	1903
1904	C	1903	1905	0	1904
1905	G	1904	1906	0	1905
1906	C	1905	1907	0	1906
1907	A	1906	1908	0	1907
1908	G	1907	1909	0	1908
1909	C	1908	1910	0	1909
1910	G	1909	1911	0	1910
1911	U	1910	1912	0	1911
1912	U	1911	1913	0	1912
1913	C	1912	1914	0	1913
1914	A	1913	1915	0	1914
1915	C	1914	1916	0	1915
1916	A	1915	1917	0	1916
1917	U	1916	1918	0	1917
1918	U	1917	1919	0	1918
1919	C	1918	1920	0	1919
1920	A	1919	1921	0	1920
1921	C	1920	1922	0	1921
1922	C	1921	1923	0	1922
1923	A	1922	1924	0	1923
1924	A	1923	1925	0	1924
1925	G	1924	1926	0	1925
1926	A	1925	1927	0	1926
1927	U	1926	1928	0	1927
1928	C	1927	1929	0	1928
1929	C	1928	1930	0	1929
1930	C	1929	1931	0	1930
1931	G	1930	1932	0	1931
1932	G	1931	1933	0	1932
1933	C	1932	1934	0	1933
1934	U	1933	1935	0	1934
1935	G	1934	1936	0	1935
1936	A	1935	1937	0	1936
1937	A	1936	1938	0	1937
1938	A	1937	1939	0	1938
1939	C	1938	1940	0	1939
1940	A	1939	1941	0	1940
1941	C	1940	1942	0	1941
1942	U	1941	1943	0	1942
1943	G	1942	1944	0	1943
1944	C	1943	1945	0	1944
1945	A	1944	1946	0	1945
1946	C	1945	1947	0	1946
1947	G	1946	1948	0	1947
1948	G	1947	1949	0	1948
1949	G	1948	1950	0	1949
1950	A	1949	1951	0	1950
1951	C	1950	1952	0	1951
1952	A	1951	1953	0	1952
1953	G	1952	1954	0	1953
1954	U	1953	1955	0	1954
1955	C	1954	1956	0	1955
1956	A	1955	1957	0	1956
1957	C	1956	1958	0	1957
1958	A	1957	1959	0	1958
1959	G	1958	1960	0	1959
1960	U	1959	1961	0	1960
1961	G	1960	1962	0	1961
1962	G	1961	1963	0	1962
1963	A	1962	1964	0	1963
1964	G	1963	1965	0	1964
1965	G	1964	1966	0	1965
1966	U	1965	1967	0	1966
1967	A	1966	1968	0	1967
1968	C	1967	1969	0	1968
1969	A	1968	1970	0	1969
1970	G	1969	1971	1903	1970
1971	U	1970	1972	1902	1971
1972	A	1971	1973	1901	1972
1973	C	1972	1974	1900	1973
1974	G	1973	1975	1899	1974
1975	C	1974	1976	1898	1975
1976	A	1975	1977	1897	1976
1977	G	1976	1978	1896	1977
1978	G	1977	1979	1895	1978
1979	G	1978	1980	1894	1979
1980	A	1979	1981	1893	1980
1981	C	1980	1982	0	1981
1982	A	1981	1983	0	1982
1983	G	1982	1984	0	1983
1984	A	1983	1985	1887	1984
1985	U	1984	1986	1886	1985
1986	G	1985	1987	1885	1986
1987	G	1986	1988	0	1987
1988	A	1987	1989	0	1988
1989	C	1988	1990	1882	1989
1990	C	1989	1991	1881	1990
1991	U	1990	1992	1880	1991
1992	U	1991	1993	1879	1992
1993	G	1992	1994	0	1993
1994	C	1993	1995	0	1994
1995	A	1994	1996	0	1995
1996	A	1995	1997	0	1996
1997	G	1996	1998	0	1997
1998	G	1997	1999	0	1998
1999	U	1998	2000	0	1999
[truncated: 8,808 more rows]
