# Supplementary material for: ScanFold: an approach for genome-wide discovery of local RNA structural elements—applications to Zika virus and HIV
Source: PeerJ. 2018 Dec 18;6:e6136. doi: 10.7717/peerj.6136 (PMC6317755; doi:10.7717/peerj.6136)
Supplement: Supplemental Information 11 [file peerj-06-6136-s011.xlsx]

## Sheet: KJ776791_ZIKV_genome.win120.stp
10807	KJ776791_ZIKV_genome.win120.stp1.rnd50.scanfold.-2.ct
4	U	3	5	70	4
5	G	4	6	69	5
6	U	5	7	68	6
7	U	6	8	67	7
8	G	7	9	66	8
9	A	8	10	65	9
10	U	9	11	64	10
11	C	10	12	62	11
12	U	11	13	61	12
13	G	12	14	60	13
14	U	13	15	59	14
59	A	58	60	14	59
60	C	59	61	13	60
61	A	60	62	12	61
62	G	61	63	11	62
64	A	63	65	10	64
65	U	64	66	9	65
66	C	65	67	8	66
67	A	66	68	7	67
68	A	67	69	6	68
69	C	68	70	5	69
70	A	69	71	4	70
125	G	124	126	149	125
126	A	125	127	148	126
127	A	126	128	146	127
128	A	127	129	145	128
129	U	128	130	144	129
130	C	129	131	143	130
131	C	130	132	142	131
132	G	131	133	141	132
133	G	132	134	140	133
134	A	133	135	139	134
139	U	138	140	134	139
140	C	139	141	133	140
141	C	140	142	132	141
142	G	141	143	131	142
143	G	142	144	130	143
144	A	143	145	129	144
145	U	144	146	128	145
146	U	145	147	127	146
148	U	147	149	126	148
149	C	148	150	125	149
161	A	160	162	178	161
162	C	161	163	177	162
163	G	162	164	176	163
164	C	163	165	175	164
165	G	164	166	174	165
166	G	165	167	173	166
173	C	172	174	166	173
174	C	173	175	165	174
175	G	174	176	164	175
176	U	175	177	163	176
177	G	176	178	162	177
178	U	177	179	161	178
179	G	178	180	196	179
180	A	179	181	195	180
181	G	180	182	194	181
182	C	181	183	193	182
183	C	182	184	192	183
184	C	183	185	191	184
185	C	184	186	190	185
190	G	189	191	185	190
191	G	190	192	184	191
192	G	191	193	183	192
193	G	192	194	182	193
194	C	193	195	181	194
195	U	194	196	180	195
196	U	195	197	179	196
199	A	198	200	266	199
200	G	199	201	265	200
202	G	201	203	263	202
203	G	202	204	262	203
204	C	203	205	261	204
205	U	204	206	260	205
206	G	205	207	259	206
210	G	209	211	253	210
211	C	210	212	252	211
212	C	211	213	251	212
213	G	212	214	250	213
214	G	213	215	248	214
215	A	214	216	247	215
216	C	215	217	246	216
217	U	216	218	245	217
218	U	217	219	242	218
219	C	218	220	241	219
220	U	219	221	240	220
221	G	220	222	239	221
223	U	222	224	237	223
224	G	223	225	236	224
225	G	224	226	235	225
226	G	225	227	234	226
227	U	226	228	233	227
228	C	227	229	232	228
232	G	231	233	228	232
233	G	232	234	227	233
234	C	233	235	226	234
235	C	234	236	225	235
236	C	235	237	224	236
237	A	236	238	223	237
239	C	238	240	221	239
240	A	239	241	220	240
241	G	240	242	219	241
242	G	241	243	218	242
245	G	244	246	217	245
246	G	245	247	216	246
247	U	246	248	215	247
248	C	247	249	214	248
250	U	249	251	213	250
251	G	250	252	212	251
252	G	251	253	211	252
253	C	252	254	210	253
259	U	258	260	206	259
260	A	259	261	205	260
261	G	260	262	204	261
262	C	261	263	203	262
263	C	262	264	202	263
265	U	264	266	200	265
266	U	265	267	199	266
274	U	273	275	326	274
275	C	274	276	325	275
278	G	277	279	289	278
279	G	278	280	288	279
280	C	279	281	287	280
287	G	286	288	280	287
288	C	287	289	279	288
289	C	288	290	278	289
291	U	290	292	324	291
292	C	291	293	323	292
293	A	292	294	322	293
294	C	293	295	321	294
295	U	294	296	320	295
296	G	295	297	319	296
297	G	296	298	318	297
298	G	297	299	317	298
299	U	298	300	316	299
300	C	299	301	315	300
301	U	300	302	314	301
302	C	301	303	313	302
303	A	302	304	312	303
304	U	303	305	311	304
305	C	304	306	310	305
310	G	309	311	305	310
311	A	310	312	304	311
312	U	311	313	303	312
313	G	312	314	302	313
314	G	313	315	301	314
315	G	314	316	300	315
316	G	315	317	299	316
317	U	316	318	298	317
318	U	317	319	297	318
319	C	318	320	296	319
320	A	319	321	295	320
321	G	320	322	294	321
322	U	321	323	293	322
323	G	322	324	292	323
324	G	323	325	291	324
325	G	324	326	275	325
326	G	325	327	274	326
355	A	354	356	370	355
356	G	355	357	369	356
358	U	357	359	367	358
359	C	358	360	366	359
366	G	365	367	359	366
367	A	366	368	358	367
369	C	368	370	356	369
370	U	369	371	355	370
433	G	432	434	529	433
434	U	433	435	528	434
435	G	434	436	527	435
436	U	435	437	526	436
437	C	436	438	525	437
438	G	437	439	524	438
442	U	441	443	520	442
443	U	442	444	519	443
444	G	443	445	518	444
445	U	444	446	517	445
446	U	445	447	516	446
447	G	446	448	482	447
448	G	447	449	481	448
449	C	448	450	480	449
450	C	449	451	479	450
451	U	450	452	478	451
452	C	451	453	477	452
453	C	452	454	476	453
455	G	454	456	475	455
456	C	455	457	474	456
457	U	456	458	473	457
458	G	457	459	472	458
460	C	459	461	471	460
461	C	460	462	470	461
462	A	461	463	469	462
469	U	468	470	462	469
470	G	469	471	461	470
471	G	470	472	460	471
472	C	471	473	458	472
473	A	472	474	457	473
474	G	473	475	456	474
475	C	474	476	455	475
476	G	475	477	453	476
477	G	476	478	452	477
478	A	477	479	451	478
479	G	478	480	450	479
480	G	479	481	449	480
481	U	480	482	448	481
482	C	481	483	447	482
484	C	483	485	493	484
485	U	484	486	492	485
486	A	485	487	491	486
491	U	490	492	486	491
492	G	491	493	485	492
493	G	492	494	484	493
516	G	515	517	446	516
517	A	516	518	445	517
518	C	517	519	444	518
519	A	518	520	443	519
520	G	519	521	442	520
524	C	523	525	438	524
525	G	524	526	437	525
526	A	525	527	436	526
527	C	526	528	435	527
528	G	527	529	434	528
529	C	528	530	433	529
1281	G	1280	1282	1372	1281
1372	C	1371	1373	1281	1372
4463	G	4462	4464	4520	4463
4464	A	4463	4465	4519	4464
4465	G	4464	4466	4518	4465
4466	U	4465	4467	4517	4466
4467	G	4466	4468	4516	4467
4469	U	4468	4470	4515	4469
4470	G	4469	4471	4514	4470
4471	A	4470	4472	4513	4471
4472	U	4471	4473	4512	4472
4473	U	4472	4474	4511	4473
4474	U	4473	4475	4510	4474
4475	C	4474	4476	4509	4475
4476	U	4475	4477	4508	4476
4477	C	4476	4478	4507	4477
4478	C	4477	4479	4505	4478
4505	G	4504	4506	4478	4505
4507	G	4506	4508	4477	4507
4508	A	4507	4509	4476	4508
4509	G	4508	4510	4475	4509
4510	A	4509	4511	4474	4510
4511	G	4510	4512	4473	4511
4512	A	4511	4513	4472	4512
4513	U	4512	4514	4471	4513
4514	C	4513	4515	4470	4514
4515	A	4514	4516	4469	4515
4516	U	4515	4517	4467	4516
4517	A	4516	4518	4466	4517
4518	C	4517	4519	4465	4518
4519	U	4518	4520	4464	4519
4520	C	4519	4521	4463	4520
5633	C	5632	5634	5667	5633
5667	G	5666	5668	5633	5667
7155	G	7154	7156	7168	7155
7156	G	7155	7157	7167	7156
7157	C	7156	7158	7166	7157
7158	A	7157	7159	7165	7158
7165	U	7164	7166	7158	7165
7166	G	7165	7167	7157	7166
7167	C	7166	7168	7156	7167
7168	C	7167	7169	7155	7168
7651	G	7650	7652	7755	7651
7652	C	7651	7653	7754	7652
7666	G	7665	7667	7748	7666
7667	U	7666	7668	7747	7667
7668	G	7667	7669	7746	7668
7746	U	7745	7747	7668	7746
7747	A	7746	7748	7667	7747
7748	C	7747	7749	7666	7748
7754	G	7753	7755	7652	7754
7755	U	7754	7756	7651	7755
10237	C	10236	10238	10288	10237
10238	G	10237	10239	10286	10238
10239	C	10238	10240	10285	10239
10240	G	10239	10241	10284	10240
10241	C	10240	10242	10283	10241
10242	A	10241	10243	10282	10242
10243	C	10242	10244	10281	10243
10244	C	10243	10245	10280	10244
10245	A	10244	10246	10279	10245
10279	U	10278	10280	10245	10279
10280	G	10279	10281	10244	10280
10281	G	10280	10282	10243	10281
10282	U	10281	10283	10242	10282
10283	G	10282	10284	10241	10283
10284	C	10283	10285	10240	10284
10285	G	10284	10286	10239	10285
10286	C	10285	10287	10238	10286
10288	G	10287	10289	10237	10288
10294	U	10293	10295	10368	10294
10295	A	10294	10296	10367	10295
10296	G	10295	10297	10366	10296
10297	G	10296	10298	10365	10297
10298	U	10297	10299	10364	10298
10299	G	10298	10300	10363	10299
10315	U	10314	10316	10362	10315
10316	G	10315	10317	10361	10316
10317	G	10316	10318	10360	10317
10318	A	10317	10319	10359	10318
10319	C	10318	10320	10358	10319
10322	C	10321	10323	10357	10322
10323	C	10322	10324	10356	10323
10324	U	10323	10325	10355	10324
10326	U	10325	10327	10354	10326
10327	C	10326	10328	10353	10327
10328	C	10327	10329	10350	10328
10329	A	10328	10330	10349	10329
10330	C	10329	10331	10348	10330
10331	C	10330	10332	10347	10331
10332	C	10331	10333	10346	10332
10333	A	10332	10334	10345	10333
10334	A	10333	10335	10344	10334
10335	G	10334	10336	10343	10335
10336	U	10335	10337	10342	10336
10342	A	10341	10343	10336	10342
10343	C	10342	10344	10335	10343
10344	U	10343	10345	10334	10344
10345	U	10344	10346	10333	10345
10346	G	10345	10347	10332	10346
10347	G	10346	10348	10331	10347
10348	G	10347	10349	10330	10348
10349	U	10348	10350	10329	10349
10350	G	10349	10351	10328	10350
10353	G	10352	10354	10327	10353
10354	A	10353	10355	10326	10354
10355	A	10354	10356	10324	10355
10356	G	10355	10357	10323	10356
10357	G	10356	10358	10322	10357
10358	G	10357	10359	10319	10358
10359	U	10358	10360	10318	10359
10360	C	10359	10361	10317	10360
10361	U	10360	10362	10316	10361
10362	A	10361	10363	10315	10362
10363	C	10362	10364	10299	10363
10364	A	10363	10365	10298	10364
10365	C	10364	10366	10297	10365
10366	C	10365	10367	10296	10366
10367	U	10366	10368	10295	10367
10368	G	10367	10369	10294	10368
10576	A	10575	10577	10611	10576
10577	G	10576	10578	10610	10577
10578	G	10577	10579	10609	10578
10580	U	10579	10581	10607	10580
10581	G	10580	10582	10606	10581
10582	G	10581	10583	10605	10582
10583	G	10582	10584	10604	10583
10588	G	10587	10589	10603	10588
10589	A	10588	10590	10602	10589
10590	A	10589	10591	10601	10590
10591	G	10590	10592	10600	10591
10592	G	10591	10593	10599	10592
10593	U	10592	10594	10598	10593
10598	A	10597	10599	10593	10598
10599	C	10598	10600	10592	10599
10600	C	10599	10601	10591	10600
10601	U	10600	10602	10590	10601
10602	U	10601	10603	10589	10602
10603	C	10602	10604	10588	10603
10604	C	10603	10605	10583	10604
10605	C	10604	10606	10582	10605
10606	C	10605	10607	10581	10606
10607	A	10606	10608	10580	10607
10609	C	10608	10610	10578	10609
10610	C	10609	10611	10577	10610
10611	U	10610	10612	10576	10611
10618	U	10617	10619	10685	10618
10619	G	10618	10620	10684	10619
10620	G	10619	10621	10683	10620
10621	G	10620	10622	10682	10621
10622	G	10621	10623	10681	10622
10623	C	10622	10624	10659	10623
10624	C	10623	10625	10658	10624
10625	U	10624	10626	10657	10625
10629	C	10628	10630	10653	10629
10630	U	10629	10631	10652	10630
10631	G	10630	10632	10651	10631
10632	G	10631	10633	10650	10632
10633	A	10632	10634	10649	10633
10634	G	10633	10635	10648	10634
10635	A	10634	10636	10647	10635
10636	U	10635	10637	10646	10636
10637	C	10636	10638	10645	10637
10645	G	10644	10646	10637	10645
10646	A	10645	10647	10636	10646
10647	U	10646	10648	10635	10647
10648	C	10647	10649	10634	10648
10649	U	10648	10650	10633	10649
10650	C	10649	10651	10632	10650
10651	C	10650	10652	10631	10651
10652	A	10651	10653	10630	10652
10653	G	10652	10654	10629	10653
10657	A	10656	10658	10625	10657
10658	G	10657	10659	10624	10658
10659	G	10658	10660	10623	10659
10681	C	10680	10682	10622	10681
10682	C	10681	10683	10621	10682
10683	C	10682	10684	10620	10683
10684	C	10683	10685	10619	10684
10685	G	10684	10686	10618	10685
10725	A	10724	10726	10807	10725
10726	G	10725	10727	10806	10726
10727	A	10726	10728	10805	10727
10728	C	10727	10729	10804	10728
10730	C	10729	10731	10803	10730
10731	C	10730	10732	10802	10731
10732	A	10731	10733	10801	10732
10733	U	10732	10734	10800	10733
10734	G	10733	10735	10799	10734
10736	G	10735	10737	10797	10736
10737	U	10736	10738	10796	10737
10738	U	10737	10739	10795	10738
10739	U	10738	10740	10794	10739
10740	C	10739	10741	10793	10740
10741	C	10740	10742	10792	10741
10743	C	10742	10744	10791	10743
10744	C	10743	10745	10790	10744
10745	A	10744	10746	10789	10745
10746	C	10745	10747	10788	10746
10747	G	10746	10748	10787	10747
10748	C	10747	10749	10786	10748
10749	U	10748	10750	10785	10749
10750	G	10749	10751	10784	10750
10751	G	10750	10752	10783	10751
10752	C	10751	10753	10782	10752
10753	C	10752	10754	10781	10753
10754	G	10753	10755	10780	10754
10755	C	10754	10756	10779	10755
10756	C	10755	10757	10778	10756
10758	G	10757	10759	10770	10758
10759	G	10758	10760	10769	10759
10760	C	10759	10761	10768	10760
10768	G	10767	10769	10760	10768
10769	C	10768	10770	10759	10769
10770	C	10769	10771	10758	10770
10778	G	10777	10779	10756	10778
10779	G	10778	10780	10755	10779
10780	C	10779	10781	10754	10780
10781	G	10780	10782	10753	10781
10782	G	10781	10783	10752	10782
10783	C	10782	10784	10751	10783
10784	C	10783	10785	10750	10784
10785	G	10784	10786	10749	10785
10786	G	10785	10787	10748	10786
10787	U	10786	10788	10747	10787
10788	G	10787	10789	10746	10788
10789	U	10788	10790	10745	10789
10790	G	10789	10791	10744	10790
10791	G	10790	10792	10743	10791
10792	G	10791	10793	10741	10792
10793	G	10792	10794	10740	10793
10794	A	10793	10795	10739	10794
10795	A	10794	10796	10738	10795
10796	A	10795	10797	10737	10796
10797	U	10796	10798	10736	10797
10799	C	10798	10800	10734	10799
10800	A	10799	10801	10733	10800
10801	U	10800	10802	10732	10801
10802	G	10801	10803	10731	10802
10803	G	10802	10804	10730	10803
10804	G	10803	10805	10728	10804
10805	U	10804	10806	10727	10805
10806	C	10805	10807	10726	10806
10807	U	10806	10808	10725	10807
