# Supplementary material for: ScanFold: an approach for genome-wide discovery of local RNA structural elements—applications to Zika virus and HIV
Source: PeerJ. 2018 Dec 18;6:e6136. doi: 10.7717/peerj.6136 (PMC6317755; doi:10.7717/peerj.6136)
Supplement: Supplemental Information 12 [file peerj-06-6136-s012.xlsx]

## Sheet: zika_genomes.alignment.singleli
>KJ776791.2 Zika virus strain H/PF/2013, complete genome
------------AGTTGTTGATCT----GTGTGAATCAGACTGCGACAGTTCGAGTTTGAAGCGAAAGCTAGCAACAGTATCAACAGGTTTTATTTTGGATTTGGAAACGAGAGTTTCTGGTCATGAAAAA-CCCAAAAAAGAAATCCGGAGGATTCCGGATTGTCAATATGCTAAAACGCGGAGTAGCCCGTGTGAGCCCCTTTGGGGGCTTGAAGAGGCTGCCAGCCGGACTTCTGCTGGGTCATGGGCCCAT
>gi|226377833|ref|NC_012532.1| Zika virus, complete genome
------------AGTTGTTGATCT----GTGTGAGTCAGACTGCGACAGTTCGAGTCTGAAGCGAGAGCTAACAACAGTATCAACAGGTTTAA-TTTGGATTTGGAAACGAGAGTTTCTGGTCATGAAAAA-CCCCAAAGAAGAAATCCGGAGGATCCGGATTGTCAATATGCTAAAACGCGGAGTAGCCCGTGTAAACCCCTTGGGAGGTTTGAAGAGGTTGCCAGCCGGACTTCTGCTGGGTCATGGACCCAT
>gi|969945756|gb|KU321639.1| Zika virus strain ZikaSPH2015, complete genome
-------------GTTGTTACTGT----TGCTGACTCAGACTGCGACAGTTCGAGTTTGAAGCGAAAGCTAGCAACAGTATCAACAGGTTTTA-TTTGGATTTGGAAACGAGAGTTTCTGGTCATGAAAAA-CCCAAAAAAGAAATCCGGAGGATTCCGGATTGTCAATATGCTAAAACGCGGAGTAGCCCGTGTGAGCCCCTTTGGGGGCTTGAAGAGGCTGCCAGCCGGACTTCTGCTGGGTCATGGGCCCAT
>gi|685052337|dbj|LC002520.1| Zika virus genomic RNA, complete genome, strain: MR766-NIID
------------AGTTGTTGATCT----GTGTGAGTCAGACTGCGACAGTTCGAGTCTGAAGCGAGAGCTAACAACAGTATCAACAGGTTTAA-TTTGGATTTGGAAACGAGAGTTTCTGGTCATGAAAAA-CCCAAAGAAGAAATCCGGAGGATTCCGGATTGTCAATATGCTAAAACGCGGAGTAGCCCGTGTAAACCCCTTGGGAGGTTTGAAGAGGTTGCCAGCCGGACTTCTGCTGGGTCATGGACCCAT
>gi|975885971|gb|KU365780.1| Zika virus strain BeH815744 polyprotein gene, complete cds
------------------------------GTGAATCAGACTGCGACAGTTCGAGTTTGAAGCGAAAGCTAGCAACAGTATCAACAGGTTTTATTTTGGATTTGGAAACGAGAGTTTCTGGTCATGAAAAA-CCCAAAAAAGAAATCCGGAGGATTCCGGATTGTCAATATGCTAAAACGCGGAGTAGCCCGTGTGAGCCCCTTTGGGGGCTTGAAGAGGCTGCCAGCCGGACTTCTGCTGGGTCATGGGCCCAT
>gi|975885969|gb|KU365779.1| Zika virus strain BeH819966 polyprotein gene, complete cds
------------------------------GTGAATCAGACTGCGACAGTTCGAGTTTGAAGCGAAAGCTAGCAACAGTATCAACAGGTTTTATTTTGGATTTGGAAACGAGAGTTTCTGGTCATGAAAAA-CCCAAAAAAGAAATCCGGAGGATTCCGGATTGTCAATATGCTAAAACGCGGAGTAGCCCGTGTGAGCCCCTTTGGGGGCTTGAAGAGGCTGCCAGCCGGACTTCTGCTGGGTCATGGGCCCAT
>gi|975885966|gb|KU365778.1| Zika virus strain BeH819015 polyprotein gene, complete cds
-----------------------------TGTGAATCAGACTGCGACAGTTCGAGTTTGAAGCGAAAGCTAGCAACAGTATCAACAGGTTTTATTTTGGATTTGGAAACGAGAGTTTCTGGTCATGAAAAA-CCCAAAAAAGAAATCCGGAGGATTCCGGATTGTCAATATGCTAAAACGCGGAGTAGCCCGTGTGAGCCCCTTTGGGGGCTTGAAGAGGCTGCCAGCCGGACTTCTGCTGGGTCATGGGCCCAT
>gi|975885964|gb|KU365777.1| Zika virus strain BeH818995 polyprotein gene, complete cds
------------------------------GTGAATCAGACTGCGACAGTTCGAGTTTGAAGCGAAAGCTAGCAACAGTATCAACAGGTTTTATTTTGGATTTGGAAACGAGAGTTTCTGGTCATGAAAAA-CCCAAAAAAGAAATCCGGAGGATTCCGGATTGTCAATATGCTAAAACGCGGAGTAGCCCGTGTGAGCCCCTTTGGGGGCTTGAAGAGGCTGCCAGCCGGACTTCTGCTGGGTCATGGGCCCAT
>gi|973447404|gb|KU312312.1| Zika virus isolate Z1106033 polyprotein gene, complete cds
-----------------------------------------------------------------------------------ACAGGTTTTATTTTGGATTTGGAAACGAGAGTTTCTGGTCATGAAAAA-CCCAAAAAAGAAATCCGGAGGATTCCGGATTGTCAATATGCTAAAACGCGGAGTAGCCCGTGTGAGCCCCTTTGGGGGCTTGAAGAGGCTGCCAGCCGGACTTCTGCTGGGTCATGGGCCCAT
>gi|592746965|gb|KF383119.1| Zika virus strain ArD158084 polyprotein gene, complete cds
---------------------------------------------------------------------------------------------------------------------------ATGAAAAA-CCCAAAGAAGAAATCCGGAGGATTCCGGATTGTCAATATGCTAAAACGCGGAGTAGCCCGTGTAAACCCCTTGGGAGGTTTGAAGAGGTTGCCAGCCGGACTTCTGCTGGGTCATGGACCCAT
>gi|592746963|gb|KF383118.1| Zika virus strain ArD157995 polyprotein gene, complete cds
---------------------------------------------------------------------------------------------------------------------------ATGAAAAA-CCCAAAGAAGAAATCCGGAAGATTCCGGATTGTCAATATGCTAAAACGCGGAGTAGCCCGTGTAAACCCCTTGGGAGGTTTGAAGAGGTTGCCAGCCGGACTTCTGCTGGGTCATGGACCCAT
>gi|592746961|gb|KF383117.1| Zika virus strain ArD128000 polyprotein gene, complete cds
---------------------------------------------------------------------------------------------------------------------------ATGAAAAA-CCCAAAGAGGAAATCCGGAGGATTCCGGATTGTCAATATGCTAAAACGCGGAGTAGCCCGTGTAAACCCCTTGGGGGGTTTGAAGAGGCTGCCAGCCGGACTTCTGCTGGGTCATGGACCCAT
>gi|592746959|gb|KF383116.1| Zika virus strain ArD7117 polyprotein gene, complete cds
---------------------------------------------------------------------------------------------------------------------------ATGAAAAA-CCCAAAGAAGAGATCCGGAGGATTCCGGATTGTCAATATGCTAAAACGCGGAGTAGCCCGTGTAAACCCCTTGGGGGGTTTGAAGAGGCTGCCGGCCGGACTTCTGCTGGGCCATGGACCCAT
>gi|592746957|gb|KF383115.1| Zika virus strain ArB1362 polyprotein gene, complete cds
---------------------------------------------------------------------------------------------------------------------------ATGAAAAA-CCCAAAGAAGAAATCCGGAGGATTCCGGATTGTCAATATGCTAAAACGCGGAGTAGCCCGTGTAAACCCCTTGGGAGGTTTGAAGAGGCTGCCAGCCGGACTTCTGCTGGGTCATGGACCCAT
>gi|572167488|gb|KF268950.1| Zika virus isolate ARB7701 polyprotein gene, complete cds
------------ACCTGTTGATCT----GTGTGAATCAGACTGCGACAGTTCGAGTTTGAAGCGAGAGCTAACAACAGTATCAACAGGTTTAA-TTTGGATTTGGAAGCGAGAGTTTCTGGTCATGAAAAA-CCCAAAGAAGAAATCCGGAGGATTCCGGATTGTCAATATGCTAAAACGCGGAGTAGCCCGTGTAAACCCCTTGGGAGGTTTGAAGAGGCTGCCAGCCGGACTTCTGCTGGGTCATGGACCCAT
>gi|572167486|gb|KF268949.1| Zika virus isolate ARB15076 polyprotein gene, complete cds
-------------GTTGTTGATCT----GTGTGAATCAGACTGCGACAGTTCGAGTTTGAAGCGAGAGCTAACAACAGTATCAACAGGTTTAA-TTTGGATTTGGAAACGAGAGTTTCTGGTCATGAAAAA-CCCAAAGAAGAAATCCGGAGGATTCCGGATTGTCAATATGCTAAAACGCGGAGTAGCCCGTGTAAACCCCTTGGGAGGTTTGAAGAGGCTGCCAGCCGGACTCCTGCTGGGTCATGGACCCAT
>gi|572167484|gb|KF268948.1| Zika virus isolate ARB13565 polyprotein gene, complete cds
------------AGTTGTTGATCT----GTGTGAATCAGACTGCGACAGTTCGAGTTTGAAGCGAGAGCTAACAACAGTATCAACAGGTTTAA-TTTGGATTTGGAAGCGAGAGTTTCTGGTCATGAAAAA-CCCAAAGAAGAAATCCGGAGGATTCCGGATTGTCAATATGCTAAAACGCGGAGTAGCCCGTGTAAACCCCTTGGGAGGTTTGAAGAGGCTGCCAGCCGGACTTCTGCTGGGTCATGGACCCAT
>gi|189092757|gb|EU545988.1| Zika virus polyprotein gene, complete cds
---------------------------------------------------------------------------------------------------------------------------ATGAAAAACCCCAAAGAAGAAATCCGGAGGA-TCCGGATTGTCAATATGCTAAAACGCGGAGTAGCCCGTGTGAGCCCCTTTGGGGGCTTGAAGAGGCTGCCAGCCGGACTTCTGCTGGGTCATGGGCCCAT
>gi|146411780|gb|DQ859059.1| Zika virus strain MR 766 polyprotein gene, complete cds
---------------------------------------------------------------------------------------------------------------------------ATGAAAAA-CCCAAAGAAGAAATCCGGAGGATTCCGGATTGTCAATATGCTAAAACGCGGAGTAGCCCGTGTAAACCCCTTGGGAGGTTTGAAGAGGCTGCCAGCCGGACTTCTGCTGGGTCATGGACCCAT
>gi|226374362|gb|AY632535.2| Zika virus strain MR 766, complete genome
------------AGTTGTTGATCT----GTGTGAGTCAGACTGCGACAGTTCGAGTCTGAAGCGAGAGCTAACAACAGTATCAACAGGTTTAA-TTTGGATTTGGAAACGAGAGTTTCTGGTCATGAAAAA-CCCCAAAGAAGAAATCCGGAGGATCCGGATTGTCAATATGCTAAAACGCGGAGTAGCCCGTGTAAACCCCTTGGGAGGTTTGAAGAGGTTGCCAGCCGGACTTCTGCTGGGTCATGGACCCAT
>gi|985578255|gb|KU497555.1| Zika virus isolate Brazil-ZKV2015, complete genome
-----------------CCAATCT------GTGAATCAGACTGCGACAGTTCGAGTTTGAAGCGAAAGCTAGCAACAGTATCAACAGGTTTTATTTTGGATTTGGAAACGAGAGTTTCTGGTCATGAAAAA-CCCAAAAAAGAAATCCGGAGGATTCCGGATTGTCAATATGCTAAAACGCGGAGTAGCCCGTGTGAGCCCCTTTGGGGGCTTGAAGAGGCTGCCAGCCGGACTTCTGCTGGGTCATGGGCCCAT
>gi|984874581|gb|KU501215.1| Zika virus strain PRVABC59, complete genome
-------------GTTGTTGATCT----GTGTGAATCAGACTGCGACAGTTCGAGTTTGAAGCGAAAGCTAGCAACAGTATCAACAGGTTTTATTTTGGATTTGGAAACGAGAGTTTCTGGTCATGAAAAA-CCCAAAAAAGAAATCCGGAGGATTCCGGATTGTCAATATGCTAAAACGCGGAGTAGCCCGTGTGAGCCCCTTTGGGGGCTTGAAGAGGCTGCCAGCCGGACTTCTGCTGGGTCATGGGCCCAT
>gi|984874583|gb|KU501216.1| Zika virus strain 103344 polyprotein gene, complete cds
---------------------------------------------------------------------------------------------------------------------------ATGAAAAA-CCCAAAAAAGAAATCCGGAGGATTCCGGATTGTCAATATGCTAAAACGCGGAGTAGCCCGTGTGAGCCCCTTTGGGGGCTTGAAGAGGCTGCCAGCCGGACTTCTGCTGGGTCATGGGCCCAT
>gi|984874585|gb|KU501217.1| Zika virus strain 8375 polyprotein gene, complete cds
---------------------------------------------------------------------------------------------------------------------------ATGAAAAA-CCCAAAAAAGAAATCCGGAGGATTCCGGATTGTCAATATGCTAAAACGCGGAGTAGCCCGTGTGAGCCCCTTTGGGGGCTTGAAGAGGCTGCCAGCCGGACTTCTGCTGGGTCATGGGCCCAT
>gi|983657312|gb|KU509998.1| Zika virus strain Haiti/1225/2014, complete genome
-------------GTTGTTACTGT----TGCTGACTCAGACTGCGACAGTTCGAGTTTGAAGCGAAAGCTAGCAACAGTATCAACAGGTTTTA-TTTGGATTTGGAAACGAGAGTTTCTGGTCATGAAAAA-CCCAAAAAAGAAATCCGGAGGATTCCGGATTGTCAATATGCTAAAACGCGGAGTAGCCCGTGTGAGCCCCTTTGGGGGCTTGAAGAGGCTGCCAGCCGGACTTCTGCTGGGTCATGGGCCCAT
>gi|982894594|gb|KU527068.1| Zika virus strain Natal RGN, complete genome
------------AGTTGTTGATCT----GTGTGAATCAGACTGCGACAGTTCGAGTTTGAAGCGAAAGCTAGCAACAGTATCAACAGGTTTTATTTTGGATTTGGAAACGAGAGTTTCTGGTCATGAAAAA-CCCAAAAAAGAAATCCGGAGGATTCCGGATTGTCAATATGCTAAAACGCGGAGTAGCCCGTGTGAGCCCCTTTGGGGGCTTGAAGAGGCTGCCAGCCGGACTTCTGCTGGGTCATGGGCCCAT
>gi|984915975|gb|KU647676.1| Zika virus strain MRS_OPY_Martinique_PaRi_2015 polyprotein gene, complete cds
----------------------------------------------------------------------------AGTATCAACAGGTTTTATTTTGGATTTGGAAACGAGAGTTTCTGGTCATGAAAAA-CCCAAAAAAGAAATCCGGAGGATTCCGGATTGTCAATATGCTAAAACGCGGAGTAGCCCGTGTGAGCCCCTTTGGGGGCTTGAAGAGGCTGCCAGCCGGACTTCTGCTGGGTCATGGGCCCAT
>gi|992324757|gb|KU707826.1| Zika virus isolate SSABR1, complete genome
--------------------------------------------GACAGTTCGAGTTTGAAGCGAAAGCTAGCAACAGTATCAACAGGTTTTA-TTTGGATTTGGAAACGAGAGTTTCTGGTCATGAAAAA-CCCAAAAAAGAAATCCGGAGGATTCCGGATTGTCAATATGCTAAAACGCGGAGTAGCCCGTGTGAGCCCCTTTGGGGGCTTGAAGAGGCTGCCAGCCGGACTTCTGCTGGGTCATGGGCCCAT
>gi|996070181|gb|KU720415.1| Zika virus strain MR 766 polyprotein gene, complete cds
-------------------GATCT----GTGTGAGTCAGACTGCGACAGTTCGAGTCTGAAGCGAGAGCTAACAACAGTATCAACAGGTTTAA-TTTGGATTTGGAAACGAGAGTTTCTGGTCATGAAAAA-CCCAAAGAAGAAATCCGGAGGATTCCGGATTGTCAATATGCTAAAACGCGGAGTAGCCCGTGTAAACCCCTTGGGAGGTTTGAAGAGGTTGCCAGCCGGACTTCTGCTGGGTCATGGACCCAT
>gi|998491032|gb|KU729218.1| Zika virus isolate BeH828305 polyprotein gene, complete cds
------------------------------GTGAATCAGACTGCGACAGTTCGAGTTTGAAGCGAAAGCTAGCAACAGTATCAACAGGTTTTATTTTGGATTTGGAAACGAGAGTTTCTGGTCATGAAAAA-CCCAAAAAAGAAATCCGGAGGATTCCGGATTGTCAATATGCTAAAACGCGGAGTAGCCCGTGTGAGCCCCTTTGGGGGCTTGAAGAGGCTGCCAGCCGGACTTCTGCTGGGTCATGGGCCCAT
>gi|998961613|gb|KU744693.1| Zika virus isolate VE_Ganxian, complete genome
-------------GTTGTTACTGT----TGCTGACTCAGACTGCGACAGTTCGAGTTTGAAGCGAAAGCTAGCAACAGTATCAACAGGTTTTA-TTTGGATTTGGAAACGAGAGTTTCTGGTCATGAAAAA-CCCAAAAAAGAAATCCGGAGGATTCCGGATTGTCAATATGCTAAAACGCGGAGTAGCCCGTGTGAGCCCCTTTGGGGGCTTGAAGAGGCTGCCAGCCGGACTTCTGCTGGGTCATGGGCCCAT
>gi|1001231706|gb|KU761564.1| Zika virus isolate GDZ16001 polyprotein gene, complete cds
---------------------------------------------------------------------------CAGTATCAACAGGTTTTATTTTGGATTTGGAAACGAGAGTTTCTGGTCATGAAAAA-CCCAAAAAAGAAATCCGGAGGATTCCGGATTGTCAATATGCTAAAACGCGGAGTAGCCCGTGTGAGCCCCTTTGGGGGCTTGAAGAGGCTGCCAGCCGGACTTCTGCTGGGTCATGGGCCCAT
>gi|1001904507|gb|KU820897.1| Zika virus isolate FLR polyprotein gene, complete cds
ACCTGTTGATACTGTTGCTAGCTTTCGCTTCAAACTCGAACTGTCGCAGTCTGATT----------------CACACAGATCAACAGGTTTTATTTTGGATTTGGAAACGAGAGTTTCTGGTCATGAAAAA-CCCAAAAAAGAAATCCGGAGGATTCCGGATTGTCAATATGCTAAAACGCGGAGTAGCCCGTGTGAGCCCCTTTGGGGGCTTGAAGAGGCTGCCAGCCGGACTTCTGCTGGGTCATGGGCCCATCAGGATGGTCTTGGCGATTCTAGCCTTTTTGAGATTCACGGCAATCAAGCCATCACTGGGTCTCATCAATAGATGGGGTTCAGTGGGGAAAAAAGAGGCTATGGAAATAATAAAGAAGTTCAAGAAAGATCTGGCTGCCATGCT…
>gi|1001904509|gb|KU820899.1| Zika virus isolate ZJ03 polyprotein gene, complete cds
---------------------------------------------------------------------------------------------------------------------------ATGAAAAA-CCCAAAAAAGAAATCCGGAGGATTCCGGATTGTCAATATGCTAAAACGCGGAGTAGCCCGTGTGAGCCCCTTTGGGGGCTTGAAGAGGCTGCCAGCCGGACTTCTGCTGGGTCATGGGCCCAT
>gi|1002394024|gb|KU729217.2| Zika virus isolate BeH823339 polyprotein gene, complete cds
------------------------------------------------GTTCGAGTTTGAAGCGAAAGCTAGCAACAGTATCAACAGGTTTTATTTTGGATTTGGAAACGAGAGTTTCTGGTCATGAAAAA-CCCAAAAAAGAAATCCGGAGGATTCCGGATTGTCAATATGCTAAAACGCGGAGTAGCCCGTGTGAGCCCCTTTGGGGGCTTGAAGAGGCTGCCAGCCGGACTTCTGCTGGGTCATGGGCCCAT
>gi|1000381324|gb|KU681081.3| Zika virus isolate Zika virus/H.sapiens-tc/THA/2014/SV0127- 14, complete genome
------------AGTTGTTGATCT----GTGTGAATCAGACTGCGACAGTTCGAGTTTGAAGCGAAAGCTAGCAACAGTATCAACAGGTTTTATTTTGGATTTGGAAACGAGAGTTTCTGGTCATGAAAAA-CCCAAAAAAGAAATCCGGAGGATTCCGGATTGTCAATATGCTAAAACGCGGAGTAGCCCGTGTGAGCCCCTTTGGGGGCTTGAAGAGGCTGCCAGCCGGACTTCTGCTGGGTCATGGGCCCAT
>gi|1000381325|gb|KU681082.3| Zika virus isolate Zika virus/H.sapiens-tc/PHL/2012/CPC-0740, complete genome
------------AGTTGTTGATCT----GTGTGAATCAGACTGCGACAGTTCGAGTTTGAAGCGAAAGCTAGCAACAGTATCAACAGGTTTTATTTTGGATTTGGAAACGAGAGTTTCTGGTCATGAAAAA-CCCAAAAAAGAAATCCGGAGGATTCCGGATTGTCAATATGCTAAAACGCGGAGTAGCCCGTGTGAGCCCCTTTGGGGGCTTGAAGAGGCTGCCAGCCGGACTTCTGCTGGGCCATGGGCCCAT
>KU955592.1 Zika virus isolate Zika virus/A.taylori-tc/SEN/1984/41662-DAK, complete genome
------------AGTTGTTGATCT----GTGTGAATCAGACTGCGACAGTTCGAGTTTGAAGCGAGAGCTAACAACAGTATCAACAGGTTTAA-TTTGGATTTGGAAACGAGAGTTTCTGGTCATGAAAAA-CCCAAAGAAGAAATCCGGAGGATTCCGGATTGTCAATATGCTAAAACGCGGAGTAGCCCGTGTAAACCCCTTGGGGGGTTTGAAGAGGCTGCCAGCCGGACTTCTGCTGGGCCATGGACCCAT
