# Supplementary material for: ScanFold: an approach for genome-wide discovery of local RNA structural elements—applications to Zika virus and HIV
Source: PeerJ. 2018 Dec 18;6:e6136. doi: 10.7717/peerj.6136 (PMC6317755; doi:10.7717/peerj.6136)
Supplement: Supplemental Information 13 [file peerj-06-6136-s013.xlsx]

## Sheet: Table S6
i	j	GC	CG	AU	UA	GU	UG	GA	AG	AA	GG	UU	CC	AC	UC	CA	CU	% canonical	BP types
4	70	0	0	0	15	0	0	0	0	0	0	0	0	0	0	0	0	100	1
5	69	15	0	0	0	0	0	0	0	0	0	0	0	0	0	0	0	100	1
6	68	0	0	0	14	0	0	0	0	0	0	0	0	0	0	2	0	87.5	1
7	67	0	0	0	15	0	0	0	0	0	0	0	0	0	0	1	0	93.75	1
8	66	12	0	0	0	0	0	0	0	0	0	0	0	5	0	0	0	70.5882	1
9	65	0	0	13	0	1	0	0	0	0	0	0	0	0	0	0	3	82.3529	2
10	64	0	0	0	16	0	0	0	0	0	0	0	0	0	0	1	0	94.1176	1
11	62	0	13	0	1	0	0	0	0	0	3	0	0	0	0	0	0	82.3529	2
12	61	0	0	0	16	0	0	0	0	0	0	0	0	0	1	0	0	94.1176	1
13	60	12	0	0	1	0	0	0	0	0	0	0	0	0	3	0	0	81.25	2
14	59	0	0	0	13	0	0	3	0	0	0	0	0	0	1	0	0	76.4706	1
20	44	0	0	0	21	0	0	0	0	0	0	0	0	0	0	0	0	100	1
21	43	0	21	0	0	0	0	0	0	0	0	0	0	0	0	0	0	100	1
22	42	0	0	21	0	0	0	0	0	0	0	0	0	0	0	0	0	100	1
23	41	4	0	0	0	17	0	0	0	0	0	0	0	0	0	0	0	100	2
24	40	0	0	22	0	0	0	0	0	0	0	0	0	0	0	0	0	100	1
25	39	0	21	0	0	0	0	0	0	0	0	0	0	0	0	0	1	95.4545	1
26	38	0	0	0	22	0	0	0	0	0	0	0	0	0	0	0	0	100	1
28	37	0	21	0	0	0	1	0	0	0	0	0	0	0	0	0	0	100	2
29	36	22	0	0	0	0	0	0	0	0	0	0	0	0	0	0	1	95.6522	1
30	35	1	0	22	0	0	0	0	0	0	0	0	0	0	0	0	0	100	2
45	54	0	0	23	0	0	0	0	0	0	0	0	0	0	0	0	0	100	1
46	53	23	0	0	0	0	0	0	0	0	0	0	0	0	0	0	0	100	1
47	52	0	23	0	0	0	0	0	0	0	0	0	0	0	0	0	0	100	1
71	117	27	0	0	0	0	0	0	0	0	0	0	0	0	0	0	0	100	1
72	116	27	0	0	0	0	0	0	0	0	0	0	0	0	0	0	0	100	1
73	115	0	0	0	27	0	0	0	0	0	0	0	0	0	0	0	0	100	1
74	114	0	0	0	27	0	0	0	0	0	0	0	0	0	0	0	0	100	1
75	113	0	0	0	27	0	0	0	0	0	0	0	0	0	0	0	0	100	1
76	112	0	0	0	19	0	0	0	0	8	0	0	0	0	0	0	0	70.3704	1
78	111	0	0	0	15	0	0	0	0	0	0	0	0	0	0	0	0	100	1
79	110	0	0	0	0	0	27	0	0	0	0	0	0	0	0	0	0	100	1
81	108	0	0	0	27	0	0	0	0	0	0	0	0	0	0	0	0	100	1
82	107	27	0	0	0	0	0	0	0	0	0	0	0	0	0	0	0	100	1
83	106	0	0	0	0	27	0	0	0	0	0	0	0	0	0	0	0	100	1
86	105	0	0	0	0	0	27	0	0	0	0	0	0	0	0	0	0	100	1
87	104	0	0	0	0	0	27	0	0	0	0	0	0	0	0	0	0	100	1
88	103	0	0	0	0	27	0	0	0	0	0	0	0	0	0	0	0	100	1
89	102	27	0	0	0	0	0	0	0	0	0	0	0	0	0	0	0	100	1
90	101	0	0	27	0	0	0	0	0	0	0	0	0	0	0	0	0	100	1
91	100	0	0	27	0	0	0	0	0	0	0	0	0	0	0	0	0	100	1
92	99	0	0	25	0	2	0	0	0	0	0	0	0	0	0	0	0	100	2
93	98	0	27	0	0	0	0	0	0	0	0	0	0	0	0	0	0	100	1
125	149	35	0	0	0	0	0	0	0	0	0	0	0	2	0	0	0	94.5946	1
126	148	0	0	35	0	2	0	0	0	0	0	0	0	0	0	0	0	100	2
127	146	0	0	36	0	1	0	0	0	0	0	0	0	0	0	0	0	100	2
128	145	0	0	37	0	0	0	0	0	0	0	0	0	0	0	0	0	100	1
129	144	0	0	0	35	0	0	0	0	2	0	0	0	0	0	0	0	94.5946	1
130	143	0	35	0	0	0	2	0	0	0	0	0	0	0	0	0	0	100	2
131	142	0	37	0	0	0	0	0	0	0	0	0	0	0	0	0	0	100	1
132	141	35	0	0	0	0	0	0	0	0	0	0	2	0	0	0	0	94.5946	1
133	140	37	0	0	0	0	0	0	0	0	0	0	0	0	0	0	0	100	1
134	139	0	0	35	0	2	0	0	0	0	0	0	0	0	0	0	0	100	2
161	178	0	0	37	0	0	0	0	0	0	0	0	0	0	0	0	0	100	1
162	177	0	37	0	0	0	0	0	0	0	0	0	0	0	0	0	0	100	1
163	176	0	0	0	0	37	0	0	0	0	0	0	0	0	0	0	0	100	1
164	175	0	37	0	0	0	0	0	0	0	0	0	0	0	0	0	0	100	1
165	174	37	0	0	0	0	0	0	0	0	0	0	0	0	0	0	0	100	1
166	173	37	0	0	0	0	0	0	0	0	0	0	0	0	0	0	0	100	1
179	196	0	0	14	0	23	0	0	0	0	0	0	0	0	0	0	0	100	2
180	195	0	0	37	0	0	0	0	0	0	0	0	0	0	0	0	0	100	1
181	194	23	0	14	0	0	0	0	0	0	0	0	0	0	0	0	0	100	2
182	193	0	37	0	0	0	0	0	0	0	0	0	0	0	0	0	0	100	1
183	192	0	37	0	0	0	0	0	0	0	0	0	0	0	0	0	0	100	1
184	191	0	26	0	0	0	0	0	0	0	0	0	0	0	0	11	0	70.2703	1
185	190	0	37	0	0	0	0	0	0	0	0	0	0	0	0	0	0	100	1
199	266	0	0	34	0	0	0	0	0	0	0	0	0	3	0	0	0	91.8919	1
200	265	0	0	0	0	37	0	0	0	0	0	0	0	0	0	0	0	100	1
202	263	37	0	0	0	0	0	0	0	0	0	0	0	0	0	0	0	100	1
203	262	37	0	0	0	0	0	0	0	0	0	0	0	0	0	0	0	100	1
204	261	0	31	0	0	0	6	0	0	0	0	0	0	0	0	0	0	100	2
205	260	0	0	0	37	0	0	0	0	0	0	0	0	0	0	0	0	100	1
206	259	0	0	0	0	37	0	0	0	0	0	0	0	0	0	0	0	100	1
210	253	37	0	0	0	0	0	0	0	0	0	0	0	0	0	0	0	100	1
211	252	0	37	0	0	0	0	0	0	0	0	0	0	0	0	0	0	100	1
212	251	0	37	0	0	0	0	0	0	0	0	0	0	0	0	0	0	100	1
213	250	0	0	0	0	37	0	0	0	0	0	0	0	0	0	0	0	100	1
214	248	23	0	0	0	14	0	0	0	0	0	0	0	0	0	0	0	100	2
215	247	0	0	37	0	0	0	0	0	0	0	0	0	0	0	0	0	100	1
216	246	0	37	0	0	0	0	0	0	0	0	0	0	0	0	0	0	100	1
217	245	0	0	0	0	0	37	0	0	0	0	0	0	0	0	0	0	100	1
218	242	0	0	0	13	0	23	0	0	0	0	0	0	0	0	1	0	97.2973	2
219	241	0	37	0	0	0	0	0	0	0	0	0	0	0	0	0	0	100	1
220	240	0	0	0	37	0	0	0	0	0	0	0	0	0	0	0	0	100	1
221	239	35	0	0	0	2	0	0	0	0	0	0	0	0	0	0	0	100	2
223	237	0	0	0	37	0	0	0	0	0	0	0	0	0	0	0	0	100	1
224	236	37	0	0	0	0	0	0	0	0	0	0	0	0	0	0	0	100	1
225	235	37	0	0	0	0	0	0	0	0	0	0	0	0	0	0	0	100	1
226	234	37	0	0	0	0	0	0	0	0	0	0	0	0	0	0	0	100	1
227	233	0	1	0	12	0	22	0	0	0	0	0	0	0	0	2	0	94.5946	3
228	232	0	37	0	0	0	0	0	0	0	0	0	0	0	0	0	0	100	1
274	326	0	0	0	1	0	36	0	0	0	0	0	0	0	0	0	0	100	2
275	325	0	26	0	0	0	11	0	0	0	0	0	0	0	0	0	0	100	2
278	289	23	0	0	0	0	0	0	0	0	0	0	0	14	0	0	0	62.1622	1
279	288	37	0	0	0	0	0	0	0	0	0	0	0	0	0	0	0	100	1
280	287	0	36	0	0	0	0	0	0	0	0	0	0	0	0	1	0	97.2973	1
291	324	0	0	0	0	0	37	0	0	0	0	0	0	0	0	0	0	100	1
292	323	0	36	0	0	0	0	0	0	0	0	0	0	0	0	0	1	97.2973	1
293	322	0	0	37	0	0	0	0	0	0	0	0	0	0	0	0	0	100	1
294	321	0	37	0	0	0	0	0	0	0	0	0	0	0	0	0	0	100	1
295	320	0	0	0	26	0	0	0	0	0	0	2	0	0	9	0	0	70.2703	1
296	319	37	0	0	0	0	0	0	0	0	0	0	0	0	0	0	0	100	1
297	318	0	0	0	0	36	0	1	0	0	0	0	0	0	0	0	0	97.2973	1
298	317	0	0	0	0	37	0	0	0	0	0	0	0	0	0	0	0	100	1
299	316	0	14	0	0	0	23	0	0	0	0	0	0	0	0	0	0	100	2
300	315	0	37	0	0	0	0	0	0	0	0	0	0	0	0	0	0	100	1
301	314	0	0	0	0	0	37	0	0	0	0	0	0	0	0	0	0	100	1
302	313	0	31	0	0	0	6	0	0	0	0	0	0	0	0	0	0	100	2
303	312	0	0	37	0	0	0	0	0	0	0	0	0	0	0	0	0	100	1
304	311	0	0	0	37	0	0	0	0	0	0	0	0	0	0	0	0	100	1
305	310	0	37	0	0	0	0	0	0	0	0	0	0	0	0	0	0	100	1
355	370	0	0	37	0	0	0	0	0	0	0	0	0	0	0	0	0	100	1
356	369	36	0	0	0	0	0	0	0	0	0	0	0	1	0	0	0	97.2973	1
358	367	0	0	0	37	0	0	0	0	0	0	0	0	0	0	0	0	100	1
359	366	0	31	0	0	0	6	0	0	0	0	0	0	0	0	0	0	100	2
433	529	36	0	0	0	0	0	0	0	0	0	0	0	1	0	0	0	97.2973	1
434	528	0	13	0	0	0	24	0	0	0	0	0	0	0	0	0	0	100	2
435	527	0	0	14	0	23	0	0	0	0	0	0	0	0	0	0	0	100	2
436	526	0	0	0	37	0	0	0	0	0	0	0	0	0	0	0	0	100	1
437	525	0	37	0	0	0	0	0	0	0	0	0	0	0	0	0	0	100	1
438	524	37	0	0	0	0	0	0	0	0	0	0	0	0	0	0	0	100	1
442	520	0	0	0	0	0	37	0	0	0	0	0	0	0	0	0	0	100	1
443	519	0	0	0	22	0	0	0	0	0	0	0	0	0	0	15	0	59.4595	1
444	518	25	0	6	0	1	0	0	0	0	0	0	0	5	0	0	0	86.4865	3
445	517	0	0	0	37	0	0	0	0	0	0	0	0	0	0	0	0	100	1
446	516	0	2	0	0	0	35	0	0	0	0	0	0	0	0	0	0	100	2
447	482	32	0	0	0	5	0	0	0	0	0	0	0	0	0	0	0	100	2
448	481	0	0	0	0	37	0	0	0	0	0	0	0	0	0	0	0	100	1
449	480	0	23	0	3	0	0	0	0	0	0	0	0	0	0	11	0	70.2703	2
450	479	0	37	0	0	0	0	0	0	0	0	0	0	0	0	0	0	100	1
451	478	0	0	0	37	0	0	0	0	0	0	0	0	0	0	0	0	100	1
452	477	0	37	0	0	0	0	0	0	0	0	0	0	0	0	0	0	100	1
453	476	0	24	0	0	0	0	0	0	0	0	0	2	0	0	11	0	64.8649	1
455	475	35	0	0	0	1	0	0	0	0	0	0	0	0	0	0	1	97.2973	2
456	474	0	36	0	0	0	1	0	0	0	0	0	0	0	0	0	0	100	2
457	473	0	0	0	37	0	0	0	0	0	0	0	0	0	0	0	0	100	1
458	472	37	0	0	0	0	0	0	0	0	0	0	0	0	0	0	0	100	1
460	471	0	37	0	0	0	0	0	0	0	0	0	0	0	0	0	0	100	1
461	470	0	25	0	0	0	12	0	0	0	0	0	0	0	0	0	0	100	2
462	469	0	0	37	0	0	0	0	0	0	0	0	0	0	0	0	0	100	1
484	493	0	37	0	0	0	0	0	0	0	0	0	0	0	0	0	0	100	1
485	492	0	4	0	0	0	33	0	0	0	0	0	0	0	0	0	0	100	2
486	491	0	0	29	0	0	0	0	0	2	0	0	0	6	0	0	0	78.3784	1
494	514	0	0	5	0	32	0	0	0	0	0	0	0	0	0	0	0	100	2
495	513	0	0	37	0	0	0	0	0	0	0	0	0	0	0	0	0	100	1
496	512	37	0	0	0	0	0	0	0	0	0	0	0	0	0	0	0	100	1
497	511	0	0	0	37	0	0	0	0	0	0	0	0	0	0	0	0	100	1
498	510	0	0	0	0	37	0	0	0	0	0	0	0	0	0	0	0	100	1
499	509	0	37	0	0	0	0	0	0	0	0	0	0	0	0	0	0	100	1
500	508	0	0	37	0	0	0	0	0	0	0	0	0	0	0	0	0	100	1
501	507	0	0	0	37	0	0	0	0	0	0	0	0	0	0	0	0	100	1
502	506	0	0	23	0	0	0	0	0	0	0	0	0	14	0	0	0	62.1622	1
537	544	37	0	0	0	0	0	0	0	0	0	0	0	0	0	0	0	100	1
1109	1126	0	0	0	0	37	0	0	0	0	0	0	0	0	0	0	0	100	1
1110	1125	0	24	0	0	0	13	0	0	0	0	0	0	0	0	0	0	100	2
1111	1124	0	0	0	23	0	14	0	0	0	0	0	0	0	0	0	0	100	2
1112	1123	37	0	0	0	0	0	0	0	0	0	0	0	0	0	0	0	100	1
1129	1165	37	0	0	0	0	0	0	0	0	0	0	0	0	0	0	0	100	1
1130	1164	0	27	0	0	0	10	0	0	0	0	0	0	0	0	0	0	100	2
1133	1161	0	37	0	0	0	0	0	0	0	0	0	0	0	0	0	0	100	1
1134	1160	0	0	29	0	0	0	0	0	0	0	0	0	8	0	0	0	78.3784	1
1135	1159	0	0	0	37	0	0	0	0	0	0	0	0	0	0	0	0	100	1
1136	1158	0	0	0	0	37	0	0	0	0	0	0	0	0	0	0	0	100	1
1137	1157	33	0	0	0	4	0	0	0	0	0	0	0	0	0	0	0	100	2
1138	1156	0	37	0	0	0	0	0	0	0	0	0	0	0	0	0	0	100	1
1139	1155	0	0	0	0	23	0	0	0	0	0	1	0	0	0	0	13	62.1622	1
1140	1154	29	0	0	0	8	0	0	0	0	0	0	0	0	0	0	0	100	2
1141	1152	0	0	37	0	0	0	0	0	0	0	0	0	0	0	0	0	100	1
1142	1151	37	0	0	0	0	0	0	0	0	0	0	0	0	0	0	0	100	1
1143	1150	35	0	0	0	0	0	0	0	0	0	0	0	2	0	0	0	94.5946	1
1175	1201	15	0	0	0	0	0	0	0	0	0	0	1	21	0	0	0	40.5405	1
1176	1200	37	0	0	0	0	0	0	0	0	0	0	0	0	0	0	0	100	1
1178	1198	0	36	0	0	0	1	0	0	0	0	0	0	0	0	0	0	100	2
1179	1197	0	0	37	0	0	0	0	0	0	0	0	0	0	0	0	0	100	1
1180	1195	0	0	0	0	0	37	0	0	0	0	0	0	0	0	0	0	100	1
1181	1194	36	0	0	0	0	0	0	0	0	0	0	0	1	0	0	0	97.2973	1
1182	1193	26	0	0	0	11	0	0	0	0	0	0	0	0	0	0	0	100	2
1183	1192	0	37	0	0	0	0	0	0	0	0	0	0	0	0	0	0	100	1
1184	1191	0	0	0	36	0	0	0	0	0	0	0	0	0	0	1	0	97.2973	1
1206	1224	0	37	0	0	0	0	0	0	0	0	0	0	0	0	0	0	100	1
1207	1223	0	0	36	0	0	0	0	0	0	0	0	0	1	0	0	0	97.2973	1
1208	1222	0	0	37	0	0	0	0	0	0	0	0	0	0	0	0	0	100	1
1209	1221	37	0	0	0	0	0	0	0	0	0	0	0	0	0	0	0	100	1
1210	1220	37	0	0	0	0	0	0	0	0	0	0	0	0	0	0	0	100	1
1211	1219	0	0	0	36	0	0	0	0	0	0	0	1	0	0	0	0	97.2973	1
1212	1218	0	0	0	0	37	0	0	0	0	0	0	0	0	0	0	0	100	1
1281	1372	37	0	0	0	0	0	0	0	0	0	0	0	0	0	0	0	100	1
1286	1369	0	0	0	32	0	0	0	0	0	0	0	0	0	0	5	0	86.4865	1
1287	1368	37	0	0	0	0	0	0	0	0	0	0	0	0	0	0	0	100	1
1288	1367	26	0	0	0	11	0	0	0	0	0	0	0	0	0	0	0	100	2
1289	1366	0	0	23	0	7	0	0	0	0	0	7	0	0	0	0	0	81.0811	2
1290	1365	0	0	0	37	0	0	0	0	0	0	0	0	0	0	0	0	100	1
1291	1364	37	0	0	0	0	0	0	0	0	0	0	0	0	0	0	0	100	1
1292	1363	0	0	0	0	0	37	0	0	0	0	0	0	0	0	0	0	100	1
1296	1361	0	35	0	0	0	0	0	1	0	0	0	0	0	0	1	0	94.5946	1
1297	1360	0	0	0	37	0	0	0	0	0	0	0	0	0	0	0	0	100	1
1298	1359	0	0	0	36	0	0	0	0	0	0	0	0	0	0	1	0	97.2973	1
1299	1358	0	0	0	0	0	35	0	0	0	0	0	0	0	2	0	0	94.5946	1
1300	1357	0	0	0	0	0	37	0	0	0	0	0	0	0	0	0	0	100	1
1301	1356	0	0	0	0	0	37	0	0	0	0	0	0	0	0	0	0	100	1
1302	1355	32	0	0	0	3	0	2	0	0	0	0	0	0	0	0	0	94.5946	2
1303	1354	37	0	0	0	0	0	0	0	0	0	0	0	0	0	0	0	100	1
1304	1352	0	37	0	0	0	0	0	0	0	0	0	0	0	0	0	0	100	1
1305	1351	0	0	37	0	0	0	0	0	0	0	0	0	0	0	0	0	100	1
1309	1343	30	0	0	0	7	0	0	0	0	0	0	0	0	0	0	0	100	2
1310	1342	36	0	0	0	0	0	0	0	0	1	0	0	0	0	0	0	97.2973	1
1311	1341	0	0	37	0	0	0	0	0	0	0	0	0	0	0	0	0	100	1
1312	1340	26	0	0	0	11	0	0	0	0	0	0	0	0	0	0	0	100	2
1313	1339	0	33	0	0	0	4	0	0	0	0	0	0	0	0	0	0	100	2
1317	1338	0	0	0	0	37	0	0	0	0	0	0	0	0	0	0	0	100	1
1318	1337	0	0	0	23	0	14	0	0	0	0	0	0	0	0	0	0	100	2
1319	1336	37	0	0	0	0	0	0	0	0	0	0	0	0	0	0	0	100	1
1321	1335	0	23	0	0	0	0	0	0	0	0	0	0	0	0	14	0	62.1622	1
1322	1334	0	0	30	0	0	0	0	0	0	0	0	0	7	0	0	0	81.0811	1
1324	1332	0	0	0	0	37	0	0	0	0	0	0	0	0	0	0	0	100	1
1325	1331	0	23	0	0	0	14	0	0	0	0	0	0	0	0	0	0	100	2
1526	1633	0	0	0	37	0	0	0	0	0	0	0	0	0	0	0	0	100	1
1527	1632	37	0	0	0	0	0	0	0	0	0	0	0	0	0	0	0	100	1
1528	1631	23	0	0	0	14	0	0	0	0	0	0	0	0	0	0	0	100	2
1529	1630	0	0	36	0	1	0	0	0	0	0	0	0	0	0	0	0	100	2
1530	1629	0	0	37	0	0	0	0	0	0	0	0	0	0	0	0	0	100	1
1538	1626	0	0	37	0	0	0	0	0	0	0	0	0	0	0	0	0	100	1
1539	1625	0	37	0	0	0	0	0	0	0	0	0	0	0	0	0	0	100	1
1540	1624	0	0	0	37	0	0	0	0	0	0	0	0	0	0	0	0	100	1
1541	1623	0	0	0	0	0	37	0	0	0	0	0	0	0	0	0	0	100	1
1544	1621	0	0	0	28	0	0	0	0	0	0	0	0	0	0	9	0	75.6757	1
1545	1620	0	0	0	37	0	0	0	0	0	0	0	0	0	0	0	0	100	1
1546	1619	37	0	0	0	0	0	0	0	0	0	0	0	0	0	0	0	100	1
1547	1618	0	0	0	36	0	1	0	0	0	0	0	0	0	0	0	0	100	2
1548	1617	37	0	0	0	0	0	0	0	0	0	0	0	0	0	0	0	100	1
1549	1616	0	0	22	0	0	0	0	13	0	0	0	0	2	0	0	0	59.4595	1
1550	1615	0	0	36	0	0	0	0	0	0	0	0	0	1	0	0	0	97.2973	1
1551	1614	0	37	0	0	0	0	0	0	0	0	0	0	0	0	0	0	100	1
1552	1613	0	35	0	0	0	0	0	0	0	0	0	0	0	0	2	0	94.5946	1
1553	1612	0	0	14	0	23	0	0	0	0	0	0	0	0	0	0	0	100	2
1554	1611	0	0	36	0	0	0	0	0	0	0	0	0	1	0	0	0	97.2973	1
1719	1742	33	0	0	0	4	0	0	0	0	0	0	0	0	0	0	0	100	2
1879	1992	0	0	37	0	0	0	0	0	0	0	0	0	0	0	0	0	100	1
1880	1991	14	0	0	0	23	0	0	0	0	0	0	0	0	0	0	0	100	2
1881	1990	37	0	0	0	0	0	0	0	0	0	0	0	0	0	0	0	100	1
1882	1989	37	0	0	0	0	0	0	0	0	0	0	0	0	0	0	0	100	1
1885	1986	0	0	0	0	0	37	0	0	0	0	0	0	0	0	0	0	100	1
1886	1985	1	0	0	0	36	0	0	0	0	0	0	0	0	0	0	0	100	2
1887	1984	0	0	0	37	0	0	0	0	0	0	0	0	0	0	0	0	100	1
1893	1980	0	0	0	37	0	0	0	0	0	0	0	0	0	0	0	0	100	1
1894	1979	0	37	0	0	0	0	0	0	0	0	0	0	0	0	0	0	100	1
1895	1978	0	37	0	0	0	0	0	0	0	0	0	0	0	0	0	0	100	1
1896	1977	0	4	0	0	0	33	0	0	0	0	0	0	0	0	0	0	100	2
1897	1976	0	0	0	37	0	0	0	0	0	0	0	0	0	0	0	0	100	1
1898	1975	36	0	0	0	0	0	0	0	0	1	0	0	0	0	0	0	97.2973	1
1899	1974	0	0	0	0	0	37	0	0	0	0	0	0	0	0	0	0	100	1
1900	1973	23	0	0	0	14	0	0	0	0	0	0	0	0	0	0	0	100	2
1901	1972	0	0	0	25	0	0	0	0	0	0	0	0	0	1	11	0	67.5676	1
1902	1971	0	0	37	0	0	0	0	0	0	0	0	0	0	0	0	0	100	1
1903	1970	0	37	0	0	0	0	0	0	0	0	0	0	0	0	0	0	100	1
2115	2125	0	37	0	0	0	0	0	0	0	0	0	0	0	0	0	0	100	1
2116	2124	0	37	0	0	0	0	0	0	0	0	0	0	0	0	0	0	100	1
2117	2123	0	0	37	0	0	0	0	0	0	0	0	0	0	0	0	0	100	1
2184	2219	0	0	37	0	0	0	0	0	0	0	0	0	0	0	0	0	100	1
2185	2218	36	0	0	0	0	0	0	0	0	0	0	0	1	0	0	0	97.2973	1
2186	2217	0	0	0	36	0	0	0	0	1	0	0	0	0	0	0	0	97.2973	1
2187	2216	37	0	0	0	0	0	0	0	0	0	0	0	0	0	0	0	100	1
2188	2215	37	0	0	0	0	0	0	0	0	0	0	0	0	0	0	0	100	1
2189	2214	0	24	0	0	0	12	0	0	0	1	0	0	0	0	0	0	97.2973	2
2192	2211	0	37	0	0	0	0	0	0	0	0	0	0	0	0	0	0	100	1
2193	2210	0	0	36	0	0	0	0	0	0	0	1	0	0	0	0	0	97.2973	1
2198	2207	0	0	0	24	0	0	0	0	0	0	0	0	0	0	13	0	64.8649	1
2199	2206	37	0	0	0	0	0	0	0	0	0	0	0	0	0	0	0	100	1
2415	2470	0	0	37	0	0	0	0	0	0	0	0	0	0	0	0	0	100	1
2416	2469	0	0	23	0	0	0	0	0	0	0	0	0	14	0	0	0	62.1622	1
2417	2468	36	0	0	0	1	0	0	0	0	0	0	0	0	0	0	0	100	2
2418	2467	0	0	37	0	0	0	0	0	0	0	0	0	0	0	0	0	100	1
2799	2871	0	0	0	37	0	0	0	0	0	0	0	0	0	0	0	0	100	1
2800	2870	0	0	0	37	0	0	0	0	0	0	0	0	0	0	0	0	100	1
2801	2869	37	0	0	0	0	0	0	0	0	0	0	0	0	0	0	0	100	1
2802	2868	0	37	0	0	0	0	0	0	0	0	0	0	0	0	0	0	100	1
2806	2867	0	0	0	24	0	13	0	0	0	0	0	0	0	0	0	0	100	2
2807	2866	37	0	0	0	0	0	0	0	0	0	0	0	0	0	0	0	100	1
2808	2865	0	37	0	0	0	0	0	0	0	0	0	0	0	0	0	0	100	1
2809	2863	0	37	0	0	0	0	0	0	0	0	0	0	0	0	0	0	100	1
2810	2862	0	0	0	35	0	0	0	0	0	0	0	0	0	0	2	0	94.5946	1
2811	2861	30	0	0	0	7	0	0	0	0	0	0	0	0	0	0	0	100	2
2812	2859	0	0	0	0	0	37	0	0	0	0	0	0	0	0	0	0	100	1
2813	2858	23	0	1	0	13	0	0	0	0	0	0	0	0	0	0	0	100	3
2814	2857	0	0	37	0	0	0	0	0	0	0	0	0	0	0	0	0	100	1
2815	2853	0	0	35	0	0	0	0	0	0	0	0	0	2	0	0	0	94.5946	1
2816	2852	0	23	0	4	0	10	0	0	0	0	0	0	0	0	0	0	100	3
2817	2851	37	0	0	0	0	0	0	0	0	0	0	0	0	0	0	0	100	1
2818	2850	0	0	35	0	1	0	0	0	0	0	0	0	0	0	0	0	100	2
2821	2847	0	0	0	37	0	0	0	0	0	0	0	0	0	0	0	0	100	1
3039	3077	0	0	36	0	0	0	0	0	0	0	0	0	1	0	0	0	97.2973	1
3040	3076	0	0	0	0	0	37	0	0	0	0	0	0	0	0	0	0	100	1
3041	3075	0	0	0	23	0	0	0	0	14	0	0	0	0	0	0	0	62.1622	1
3042	3074	37	0	0	0	0	0	0	0	0	0	0	0	0	0	0	0	100	1
3043	3072	37	0	0	0	0	0	0	0	0	0	0	0	0	0	0	0	100	1
3045	3070	0	0	23	0	0	0	0	0	0	0	0	0	14	0	0	0	62.1622	1
3046	3069	0	37	0	0	0	0	0	0	0	0	0	0	0	0	0	0	100	1
3047	3068	0	0	26	0	0	0	0	0	0	0	0	0	11	0	0	0	70.2703	1
3048	3067	37	0	0	0	0	0	0	0	0	0	0	0	0	0	0	0	100	1
3049	3066	0	37	0	0	0	0	0	0	0	0	0	0	0	0	0	0	100	1
3050	3065	0	0	0	3	0	34	0	0	0	0	0	0	0	0	0	0	100	2
3078	3095	0	0	0	0	37	0	0	0	0	0	0	0	0	0	0	0	100	1
3079	3094	0	0	37	0	0	0	0	0	0	0	0	0	0	0	0	0	100	1
3080	3093	0	0	0	34	0	0	0	0	0	0	0	0	0	0	3	0	91.8919	1
3081	3092	0	37	0	0	0	0	0	0	0	0	0	0	0	0	0	0	100	1
3082	3091	0	0	0	0	0	37	0	0	0	0	0	0	0	0	0	0	100	1
3083	3090	0	0	29	0	8	0	0	0	0	0	0	0	0	0	0	0	100	2
3084	3089	27	0	0	0	9	0	0	0	0	0	1	0	0	0	0	0	97.2973	2
3113	3159	0	37	0	0	0	0	0	0	0	0	0	0	0	0	0	0	100	1
3114	3158	0	0	37	0	0	0	0	0	0	0	0	0	0	0	0	0	100	1
3115	3157	0	37	0	0	0	0	0	0	0	0	0	0	0	0	0	0	100	1
3116	3156	0	0	37	0	0	0	0	0	0	0	0	0	0	0	0	0	100	1
3118	3154	37	0	0	0	0	0	0	0	0	0	0	0	0	0	0	0	100	1
3121	3134	34	0	0	0	3	0	0	0	0	0	0	0	0	0	0	0	100	2
3122	3133	37	0	0	0	0	0	0	0	0	0	0	0	0	0	0	0	100	1
3123	3132	0	36	0	0	0	1	0	0	0	0	0	0	0	0	0	0	100	2
3124	3131	0	0	0	0	0	37	0	0	0	0	0	0	0	0	0	0	100	1
3135	3149	0	37	0	0	0	0	0	0	0	0	0	0	0	0	0	0	100	1
3136	3148	0	0	37	0	0	0	0	0	0	0	0	0	0	0	0	0	100	1
3137	3147	0	0	0	25	0	0	0	0	0	0	0	0	0	0	12	0	67.5676	1
3138	3146	0	36	0	0	0	1	0	0	0	0	0	0	0	0	0	0	100	2
3139	3145	0	0	0	37	0	0	0	0	0	0	0	0	0	0	0	0	100	1
3165	3193	0	37	0	0	0	0	0	0	0	0	0	0	0	0	0	0	100	1
3166	3192	0	37	0	0	0	0	0	0	0	0	0	0	0	0	0	0	100	1
3170	3187	36	0	0	0	0	0	0	0	0	0	0	0	1	0	0	0	97.2973	1
3171	3186	0	0	0	36	0	1	0	0	0	0	0	0	0	0	0	0	100	2
3172	3185	0	37	0	0	0	0	0	0	0	0	0	0	0	0	0	0	100	1
3173	3184	0	23	0	0	0	14	0	0	0	0	0	0	0	0	0	0	100	2
3175	3183	0	0	37	0	0	0	0	0	0	0	0	0	0	0	0	0	100	1
3176	3182	0	37	0	0	0	0	0	0	0	0	0	0	0	0	0	0	100	1
3177	3181	0	0	37	0	0	0	0	0	0	0	0	0	0	0	0	0	100	1
3198	3215	37	0	0	0	0	0	0	0	0	0	0	0	0	0	0	0	100	1
3199	3214	0	0	37	0	0	0	0	0	0	0	0	0	0	0	0	0	100	1
3202	3211	0	0	37	0	0	0	0	0	0	0	0	0	0	0	0	0	100	1
3203	3210	21	0	0	0	0	0	0	0	0	0	0	0	16	0	0	0	56.7568	1
3204	3209	0	0	37	0	0	0	0	0	0	0	0	0	0	0	0	0	100	1
3226	3303	0	37	0	0	0	0	0	0	0	0	0	0	0	0	0	0	100	1
3227	3302	0	0	0	33	0	2	0	0	0	0	0	0	0	0	2	0	94.5946	2
3229	3300	0	0	0	0	0	37	0	0	0	0	0	0	0	0	0	0	100	1
3230	3299	0	0	37	0	0	0	0	0	0	0	0	0	0	0	0	0	100	1
3232	3298	0	37	0	0	0	0	0	0	0	0	0	0	0	0	0	0	100	1
3233	3297	0	0	0	37	0	0	0	0	0	0	0	0	0	0	0	0	100	1
3234	3296	30	0	0	0	7	0	0	0	0	0	0	0	0	0	0	0	100	2
3236	3294	23	0	0	0	0	0	0	0	0	0	0	0	0	14	0	0	62.1622	1
3237	3293	0	37	0	0	0	0	0	0	0	0	0	0	0	0	0	0	100	1
3238	3292	0	37	0	0	0	0	0	0	0	0	0	0	0	0	0	0	100	1
3239	3291	0	0	37	0	0	0	0	0	0	0	0	0	0	0	0	0	100	1
3243	3267	0	0	37	0	0	0	0	0	0	0	0	0	0	0	0	0	100	1
3244	3266	23	0	0	0	14	0	0	0	0	0	0	0	0	0	0	0	100	2
3245	3265	0	37	0	0	0	0	0	0	0	0	0	0	0	0	0	0	100	1
3246	3264	0	37	0	0	0	0	0	0	0	0	0	0	0	0	0	0	100	1
3248	3262	0	0	0	23	0	0	0	0	0	0	0	0	0	0	14	0	62.1622	1
3249	3261	0	37	0	0	0	0	0	0	0	0	0	0	0	0	0	0	100	1
3271	3289	37	0	0	0	0	0	0	0	0	0	0	0	0	0	0	0	100	1
3272	3288	23	0	0	0	0	0	0	0	0	0	0	0	14	0	0	0	62.1622	1
3274	3287	0	37	0	0	0	0	0	0	0	0	0	0	0	0	0	0	100	1
3275	3286	0	28	0	0	0	9	0	0	0	0	0	0	0	0	0	0	100	2
3276	3285	0	37	0	0	0	0	0	0	0	0	0	0	0	0	0	0	100	1
3305	3335	34	0	0	0	1	0	2	0	0	0	0	0	0	0	0	0	94.5946	2
3306	3334	0	37	0	0	0	0	0	0	0	0	0	0	0	0	0	0	100	1
3307	3333	0	0	0	0	0	37	0	0	0	0	0	0	0	0	0	0	100	1
3308	3332	0	0	0	34	0	1	0	0	0	0	0	0	0	0	2	0	94.5946	2
3309	3331	37	0	0	0	0	0	0	0	0	0	0	0	0	0	0	0	100	1
3312	3327	0	0	37	0	0	0	0	0	0	0	0	0	0	0	0	0	100	1
3313	3326	0	0	0	35	0	2	0	0	0	0	0	0	0	0	0	0	100	2
3314	3325	0	0	0	23	0	0	0	0	0	0	0	0	0	0	14	0	62.1622	1
3315	3324	0	37	0	0	0	0	0	0	0	0	0	0	0	0	0	0	100	1
3343	3365	0	0	0	36	0	1	0	0	0	0	0	0	0	0	0	0	100	2
3344	3364	0	23	0	0	0	14	0	0	0	0	0	0	0	0	0	0	100	2
3345	3363	0	32	0	0	0	5	0	0	0	0	0	0	0	0	0	0	100	2
3346	3362	0	0	23	0	0	0	0	0	0	0	0	0	14	0	0	0	62.1622	1
3347	3361	0	35	0	0	0	2	0	0	0	0	0	0	0	0	0	0	100	2
3348	3360	0	0	0	0	37	0	0	0	0	0	0	0	0	0	0	0	100	1
3349	3359	0	0	0	37	0	0	0	0	0	0	0	0	0	0	0	0	100	1
3350	3358	37	0	0	0	0	0	0	0	0	0	0	0	0	0	0	0	100	1
3371	3426	0	0	37	0	0	0	0	0	0	0	0	0	0	0	0	0	100	1
3372	3425	37	0	0	0	0	0	0	0	0	0	0	0	0	0	0	0	100	1
3374	3423	0	0	37	0	0	0	0	0	0	0	0	0	0	0	0	0	100	1
3375	3422	0	37	0	0	0	0	0	0	0	0	0	0	0	0	0	0	100	1
3376	3421	0	37	0	0	0	0	0	0	0	0	0	0	0	0	0	0	100	1
3377	3420	0	0	37	0	0	0	0	0	0	0	0	0	0	0	0	0	100	1
3378	3419	0	0	0	37	0	0	0	0	0	0	0	0	0	0	0	0	100	1
3380	3418	0	0	0	36	0	0	0	0	0	0	0	0	0	0	1	0	97.2973	1
3381	3417	0	37	0	0	0	0	0	0	0	0	0	0	0	0	0	0	100	1
3382	3416	0	0	0	0	0	37	0	0	0	0	0	0	0	0	0	0	100	1
3385	3413	23	0	0	0	12	0	2	0	0	0	0	0	0	0	0	0	94.5946	2
3386	3412	0	0	37	0	0	0	0	0	0	0	0	0	0	0	0	0	100	1
3387	3411	0	0	0	37	0	0	0	0	0	0	0	0	0	0	0	0	100	1
3388	3410	0	23	0	0	0	0	0	0	0	0	0	14	0	0	0	0	62.1622	1
3389	3409	0	0	37	0	0	0	0	0	0	0	0	0	0	0	0	0	100	1
3391	3407	0	37	0	0	0	0	0	0	0	0	0	0	0	0	0	0	100	1
3392	3406	0	28	0	0	0	9	0	0	0	0	0	0	0	0	0	0	100	2
3394	3403	0	37	0	0	0	0	0	0	0	0	0	0	0	0	0	0	100	1
3395	3402	0	0	0	0	0	37	0	0	0	0	0	0	0	0	0	0	100	1
3396	3401	24	0	0	0	13	0	0	0	0	0	0	0	0	0	0	0	100	2
3461	3474	0	0	13	0	24	0	0	0	0	0	0	0	0	0	0	0	100	2
3462	3473	37	0	0	0	0	0	0	0	0	0	0	0	0	0	0	0	100	1
3463	3472	0	37	0	0	0	0	0	0	0	0	0	0	0	0	0	0	100	1
3464	3471	0	0	0	0	0	23	0	11	0	3	0	0	0	0	0	0	62.1622	1
3465	3470	0	0	25	0	0	0	0	0	0	0	0	0	12	0	0	0	67.5676	1
4148	4261	0	0	0	0	37	0	0	0	0	0	0	0	0	0	0	0	100	1
4149	4260	37	0	0	0	0	0	0	0	0	0	0	0	0	0	0	0	100	1
4150	4259	36	0	0	0	1	0	0	0	0	0	0	0	0	0	0	0	100	2
4152	4258	0	23	0	0	0	13	0	1	0	0	0	0	0	0	0	0	97.2973	2
4153	4257	0	0	0	0	0	37	0	0	0	0	0	0	0	0	0	0	100	1
4154	4256	1	0	22	0	13	0	0	0	0	0	0	0	0	0	0	1	97.2973	3
4155	4255	0	0	36	0	1	0	0	0	0	0	0	0	0	0	0	0	100	2
4156	4254	0	37	0	0	0	0	0	0	0	0	0	0	0	0	0	0	100	1
4158	4252	37	0	0	0	0	0	0	0	0	0	0	0	0	0	0	0	100	1
4463	4520	35	0	0	0	2	0	0	0	0	0	0	0	0	0	0	0	100	2
4464	4519	0	0	37	0	0	0	0	0	0	0	0	0	0	0	0	0	100	1
4465	4518	37	0	0	0	0	0	0	0	0	0	0	0	0	0	0	0	100	1
4466	4517	0	0	0	37	0	0	0	0	0	0	0	0	0	0	0	0	100	1
4467	4516	0	0	0	0	37	0	0	0	0	0	0	0	0	0	0	0	100	1
4469	4515	0	0	0	37	0	0	0	0	0	0	0	0	0	0	0	0	100	1
4470	4514	37	0	0	0	0	0	0	0	0	0	0	0	0	0	0	0	100	1
4471	4513	0	0	37	0	0	0	0	0	0	0	0	0	0	0	0	0	100	1
4472	4512	0	0	0	34	0	0	0	0	0	0	0	0	0	0	3	0	91.8919	1
4473	4511	0	0	0	0	0	37	0	0	0	0	0	0	0	0	0	0	100	1
4474	4510	0	0	0	37	0	0	0	0	0	0	0	0	0	0	0	0	100	1
4475	4509	0	37	0	0	0	0	0	0	0	0	0	0	0	0	0	0	100	1
4476	4508	0	0	0	37	0	0	0	0	0	0	0	0	0	0	0	0	100	1
4477	4507	0	37	0	0	0	0	0	0	0	0	0	0	0	0	0	0	100	1
4478	4505	0	32	0	0	0	5	0	0	0	0	0	0	0	0	0	0	100	2
4480	4503	0	0	0	37	0	0	0	0	0	0	0	0	0	0	0	0	100	1
4481	4502	35	0	0	0	0	0	0	0	0	0	0	0	2	0	0	0	94.5946	1
4482	4501	37	0	0	0	0	0	0	0	0	0	0	0	0	0	0	0	100	1
4484	4500	27	0	0	0	0	0	0	0	0	0	0	0	10	0	0	0	72.973	1
4485	4499	22	0	0	0	0	0	15	0	0	0	0	0	0	0	0	0	59.4595	1
4487	4498	37	0	0	0	0	0	0	0	0	0	0	0	0	0	0	0	100	1
4488	4497	37	0	0	0	0	0	0	0	0	0	0	0	0	0	0	0	100	1
4489	4496	0	0	34	0	0	0	0	0	0	0	0	0	3	0	0	0	91.8919	1
4490	4495	0	0	0	0	0	23	0	11	0	3	0	0	0	0	0	0	62.1622	1
4522	4542	0	0	37	0	0	0	0	0	0	0	0	0	0	0	0	0	100	1
4523	4541	34	0	0	0	0	0	0	0	0	0	0	0	3	0	0	0	91.8919	1
4524	4540	0	0	0	0	37	0	0	0	0	0	0	0	0	0	0	0	100	1
4525	4539	0	0	0	37	0	0	0	0	0	0	0	0	0	0	0	0	100	1
4526	4538	37	0	0	0	0	0	0	0	0	0	0	0	0	0	0	0	100	1
4527	4537	37	0	0	0	0	0	0	0	0	0	0	0	0	0	0	0	100	1
4528	4536	0	0	0	23	0	14	0	0	0	0	0	0	0	0	0	0	100	2
4529	4535	0	36	0	0	0	1	0	0	0	0	0	0	0	0	0	0	100	2
4543	4564	0	0	0	0	37	0	0	0	0	0	0	0	0	0	0	0	100	1
4544	4563	0	0	0	36	0	0	0	0	0	0	0	0	0	0	1	0	97.2973	1
4545	4562	31	0	0	0	6	0	0	0	0	0	0	0	0	0	0	0	100	2
4546	4561	37	0	0	0	0	0	0	0	0	0	0	0	0	0	0	0	100	1
4547	4560	0	37	0	0	0	0	0	0	0	0	0	0	0	0	0	0	100	1
4549	4556	0	0	0	37	0	0	0	0	0	0	0	0	0	0	0	0	100	1
4550	4555	37	0	0	0	0	0	0	0	0	0	0	0	0	0	0	0	100	1
4612	4642	37	0	0	0	0	0	0	0	0	0	0	0	0	0	0	0	100	1
4613	4641	37	0	0	0	0	0	0	0	0	0	0	0	0	0	0	0	100	1
4615	4639	37	0	0	0	0	0	0	0	0	0	0	0	0	0	0	0	100	1
4616	4638	0	0	0	0	0	37	0	0	0	0	0	0	0	0	0	0	100	1
4617	4636	37	0	0	0	0	0	0	0	0	0	0	0	0	0	0	0	100	1
4618	4635	37	0	0	0	0	0	0	0	0	0	0	0	0	0	0	0	100	1
4619	4634	0	6	0	0	0	30	0	1	0	0	0	0	0	0	0	0	97.2973	2
4621	4632	0	37	0	0	0	0	0	0	0	0	0	0	0	0	0	0	100	1
4624	4628	0	0	0	0	0	37	0	0	0	0	0	0	0	0	0	0	100	1
4658	4667	23	0	3	0	0	0	0	0	0	0	0	0	11	0	0	0	70.2703	2
4659	4666	37	0	0	0	0	0	0	0	0	0	0	0	0	0	0	0	100	1
4674	4704	37	0	0	0	0	0	0	0	0	0	0	0	0	0	0	0	100	1
4676	4702	0	0	35	0	2	0	0	0	0	0	0	0	0	0	0	0	100	2
4677	4701	36	0	0	0	1	0	0	0	0	0	0	0	0	0	0	0	100	2
4678	4700	0	0	0	37	0	0	0	0	0	0	0	0	0	0	0	0	100	1
4680	4698	0	0	0	37	0	0	0	0	0	0	0	0	0	0	0	0	100	1
4681	4697	0	0	21	0	0	0	0	0	0	0	0	0	16	0	0	0	56.7568	1
4682	4696	0	37	0	0	0	0	0	0	0	0	0	0	0	0	0	0	100	1
4684	4695	37	0	0	0	0	0	0	0	0	0	0	0	0	0	0	0	100	1
4685	4694	0	0	33	0	0	0	0	0	0	0	0	0	4	0	0	0	89.1892	1
4686	4693	37	0	0	0	0	0	0	0	0	0	0	0	0	0	0	0	100	1
4687	4692	0	0	0	37	0	0	0	0	0	0	0	0	0	0	0	0	100	1
4969	5032	0	0	37	0	0	0	0	0	0	0	0	0	0	0	0	0	100	1
4970	5031	37	0	0	0	0	0	0	0	0	0	0	0	0	0	0	0	100	1
4971	5030	37	0	0	0	0	0	0	0	0	0	0	0	0	0	0	0	100	1
4972	5029	0	0	37	0	0	0	0	0	0	0	0	0	0	0	0	0	100	1
4973	5028	0	0	0	31	0	0	0	0	0	0	0	0	0	0	6	0	83.7838	1
4974	5026	37	0	0	0	0	0	0	0	0	0	0	0	0	0	0	0	100	1
4975	5025	37	0	0	0	0	0	0	0	0	0	0	0	0	0	0	0	100	1
4976	5024	3	0	0	0	34	0	0	0	0	0	0	0	0	0	0	0	100	2
4977	5023	37	0	0	0	0	0	0	0	0	0	0	0	0	0	0	0	100	1
4978	5022	0	0	37	0	0	0	0	0	0	0	0	0	0	0	0	0	100	1
4981	5019	0	0	0	0	0	37	0	0	0	0	0	0	0	0	0	0	100	1
4982	5018	0	0	0	23	0	0	0	0	0	0	0	0	0	0	14	0	62.1622	1
4983	5017	37	0	0	0	0	0	0	0	0	0	0	0	0	0	0	0	100	1
4984	5016	0	0	0	0	37	0	0	0	0	0	0	0	0	0	0	0	100	1
4988	5015	1	0	5	0	21	0	0	0	0	0	0	0	10	0	0	0	72.973	3
4989	5014	37	0	0	0	0	0	0	0	0	0	0	0	0	0	0	0	100	1
4990	5013	0	0	0	37	0	0	0	0	0	0	0	0	0	0	0	0	100	1
4991	5012	0	0	0	27	0	6	0	0	0	0	0	0	0	0	4	0	89.1892	2
4993	5010	0	37	0	0	0	0	0	0	0	0	0	0	0	0	0	0	100	1
4994	5008	22	0	0	0	0	0	0	0	0	0	0	0	1	14	0	0	59.4595	1
4995	5007	0	35	0	0	0	2	0	0	0	0	0	0	0	0	0	0	100	2
4996	5006	0	0	0	23	0	0	0	0	0	0	7	0	0	7	0	0	62.1622	1
4997	5005	34	0	0	0	0	0	0	0	0	0	0	0	3	0	0	0	91.8919	1
4998	5004	37	0	0	0	0	0	0	0	0	0	0	0	0	0	0	0	100	1
5050	5082	0	0	0	37	0	0	0	0	0	0	0	0	0	0	0	0	100	1
5051	5081	34	0	0	0	0	0	3	0	0	0	0	0	0	0	0	0	91.8919	1
5052	5080	0	0	37	0	0	0	0	0	0	0	0	0	0	0	0	0	100	1
5053	5079	0	0	0	37	0	0	0	0	0	0	0	0	0	0	0	0	100	1
5054	5077	0	0	37	0	0	0	0	0	0	0	0	0	0	0	0	0	100	1
5056	5075	23	0	0	0	14	0	0	0	0	0	0	0	0	0	0	0	100	2
5057	5074	0	0	37	0	0	0	0	0	0	0	0	0	0	0	0	0	100	1
5058	5073	0	37	0	0	0	0	0	0	0	0	0	0	0	0	0	0	100	1
5059	5072	0	0	0	0	0	37	0	0	0	0	0	0	0	0	0	0	100	1
5060	5071	0	10	0	0	0	27	0	0	0	0	0	0	0	0	0	0	100	2
5061	5070	0	0	0	0	0	37	0	0	0	0	0	0	0	0	0	0	100	1
5062	5069	0	0	37	0	0	0	0	0	0	0	0	0	0	0	0	0	100	1
5063	5068	0	0	0	37	0	0	0	0	0	0	0	0	0	0	0	0	100	1
5086	5140	0	0	37	0	0	0	0	0	0	0	0	0	0	0	0	0	100	1
5087	5139	0	2	0	0	0	35	0	0	0	0	0	0	0	0	0	0	100	2
5088	5138	0	0	0	0	23	0	3	0	0	11	0	0	0	0	0	0	62.1622	1
5089	5137	37	0	0	0	0	0	0	0	0	0	0	0	0	0	0	0	100	1
5090	5136	23	0	0	0	0	0	0	0	0	0	0	0	14	0	0	0	62.1622	1
5091	5135	0	0	36	0	0	0	0	0	0	0	0	0	1	0	0	0	97.2973	1
5092	5134	37	0	0	0	0	0	0	0	0	0	0	0	0	0	0	0	100	1
5093	5133	0	3	0	23	0	0	0	0	0	0	0	0	0	0	11	0	70.2703	2
5094	5132	0	0	0	0	0	37	0	0	0	0	0	0	0	0	0	0	100	1
5096	5131	0	0	0	37	0	0	0	0	0	0	0	0	0	0	0	0	100	1
5098	5129	0	0	0	23	0	14	0	0	0	0	0	0	0	0	0	0	100	2
5099	5128	0	0	0	35	0	0	0	0	0	0	0	0	0	0	2	0	94.5946	1
5102	5125	0	0	0	37	0	0	0	0	0	0	0	0	0	0	0	0	100	1
5104	5123	0	37	0	0	0	0	0	0	0	0	0	0	0	0	0	0	100	1
5105	5122	0	29	0	0	0	7	0	1	0	0	0	0	0	0	0	0	97.2973	2
5107	5120	0	0	0	3	0	34	0	0	0	0	0	0	0	0	0	0	100	2
5108	5119	0	23	0	0	0	0	0	0	14	0	0	0	0	0	0	0	62.1622	1
5152	5207	0	0	23	0	0	0	0	0	0	0	0	0	14	0	0	0	62.1622	1
5154	5205	0	37	0	0	0	0	0	0	0	0	0	0	0	0	0	0	100	1
5155	5203	0	37	0	0	0	0	0	0	0	0	0	0	0	0	0	0	100	1
5156	5202	0	16	0	0	0	21	0	0	0	0	0	0	0	0	0	0	100	2
5298	5356	0	0	1	0	36	0	0	0	0	0	0	0	0	0	0	0	100	2
5299	5355	0	36	0	0	0	0	0	0	0	1	0	0	0	0	0	0	97.2973	1
5300	5354	0	0	0	36	0	0	0	0	1	0	0	0	0	0	0	0	97.2973	1
5302	5352	0	37	0	0	0	0	0	0	0	0	0	0	0	0	0	0	100	1
5303	5351	0	0	0	35	0	0	0	0	1	0	0	0	0	0	1	0	94.5946	1
5304	5350	36	0	0	0	0	0	0	0	0	0	0	0	0	1	0	0	97.2973	1
5312	5332	34	0	0	0	1	0	0	0	0	0	0	0	0	0	0	0	100	2
5313	5331	36	0	0	0	0	1	0	0	0	0	0	0	0	0	0	0	100	2
5314	5330	0	0	35	0	1	0	0	1	0	0	0	0	0	0	0	0	97.2973	2
5315	5329	1	0	20	0	16	0	0	0	0	0	0	0	0	0	0	0	100	3
5316	5328	36	0	0	0	0	0	0	0	0	0	1	0	0	0	0	0	97.2973	1
5317	5327	0	23	0	0	0	0	0	0	0	0	0	0	0	0	14	0	62.1622	1
5318	5326	0	36	0	0	0	0	0	0	0	0	0	1	0	0	0	0	97.2973	1
5319	5325	0	26	0	0	0	10	0	0	0	0	0	0	0	1	0	0	97.2973	2
5320	5324	0	0	0	36	0	1	0	0	0	0	0	0	0	0	0	0	100	2
5338	5347	37	0	0	0	0	0	0	0	0	0	0	0	0	0	0	0	100	1
5339	5346	0	0	0	37	0	0	0	0	0	0	0	0	0	0	0	0	100	1
5376	5397	0	0	37	0	0	0	0	0	0	0	0	0	0	0	0	0	100	1
5377	5396	0	37	0	0	0	0	0	0	0	0	0	0	0	0	0	0	100	1
5378	5395	0	0	37	0	0	0	0	0	0	0	0	0	0	0	0	0	100	1
5469	5480	37	0	0	0	0	0	0	0	0	0	0	0	0	0	0	0	100	1
5470	5479	0	0	37	0	0	0	0	0	0	0	0	0	0	0	0	0	100	1
5471	5478	0	0	14	0	23	0	0	0	0	0	0	0	0	0	0	0	100	2
5472	5477	32	0	0	0	5	0	0	0	0	0	0	0	0	0	0	0	100	2
5513	5534	0	34	0	0	0	3	0	0	0	0	0	0	0	0	0	0	100	2
5514	5533	0	0	37	0	0	0	0	0	0	0	0	0	0	0	0	0	100	1
5515	5532	0	0	0	37	0	0	0	0	0	0	0	0	0	0	0	0	100	1
5516	5531	0	0	0	0	0	23	0	1	13	0	0	0	0	0	0	0	62.1622	1
5517	5530	0	0	0	37	0	0	0	0	0	0	0	0	0	0	0	0	100	1
5518	5529	0	37	0	0	0	0	0	0	0	0	0	0	0	0	0	0	100	1
5519	5528	0	0	37	0	0	0	0	0	0	0	0	0	0	0	0	0	100	1
5520	5527	0	0	37	0	0	0	0	0	0	0	0	0	0	0	0	0	100	1
5521	5526	0	37	0	0	0	0	0	0	0	0	0	0	0	0	0	0	100	1
5535	5569	37	0	0	0	0	0	0	0	0	0	0	0	0	0	0	0	100	1
5536	5568	37	0	0	0	0	0	0	0	0	0	0	0	0	0	0	0	100	1
5537	5567	0	25	0	0	0	0	0	0	0	0	0	1	0	0	11	0	67.5676	1
5538	5566	37	0	0	0	0	0	0	0	0	0	0	0	0	0	0	0	100	1
5540	5564	36	0	0	0	1	0	0	0	0	0	0	0	0	0	0	0	100	2
5541	5563	37	0	0	0	0	0	0	0	0	0	0	0	0	0	0	0	100	1
5542	5562	0	37	0	0	0	0	0	0	0	0	0	0	0	0	0	0	100	1
5543	5561	22	0	1	0	10	0	3	0	0	0	0	0	1	0	0	0	89.1892	3
5544	5560	37	0	0	0	0	0	0	0	0	0	0	0	0	0	0	0	100	1
5545	5558	0	37	0	0	0	0	0	0	0	0	0	0	0	0	0	0	100	1
5587	5627	0	37	0	0	0	0	0	0	0	0	0	0	0	0	0	0	100	1
5588	5626	0	0	26	0	11	0	0	0	0	0	0	0	0	0	0	0	100	2
5589	5625	0	0	0	0	0	37	0	0	0	0	0	0	0	0	0	0	100	1
5590	5624	0	0	0	36	0	1	0	0	0	0	0	0	0	0	0	0	100	2
5591	5623	0	0	0	34	0	0	0	0	0	0	0	0	0	0	3	0	91.8919	1
5592	5622	0	37	0	0	0	0	0	0	0	0	0	0	0	0	0	0	100	1
5594	5621	23	0	0	9	0	0	1	0	4	0	0	0	0	0	0	0	86.4865	2
5595	5620	37	0	0	0	0	0	0	0	0	0	0	0	0	0	0	0	100	1
5598	5617	0	0	0	37	0	0	0	0	0	0	0	0	0	0	0	0	100	1
5599	5616	0	37	0	0	0	0	0	0	0	0	0	0	0	0	0	0	100	1
5600	5615	0	28	0	0	0	9	0	0	0	0	0	0	0	0	0	0	100	2
5601	5614	0	0	36	0	0	0	0	0	0	0	0	0	1	0	0	0	97.2973	1
5633	5667	0	36	0	0	0	1	0	0	0	0	0	0	0	0	0	0	100	2
5634	5666	0	37	0	0	0	0	0	0	0	0	0	0	0	0	0	0	100	1
5635	5665	0	37	0	0	0	0	0	0	0	0	0	0	0	0	0	0	100	1
5636	5664	0	0	37	0	0	0	0	0	0	0	0	0	0	0	0	0	100	1
5637	5663	2	0	0	0	35	0	0	0	0	0	0	0	0	0	0	0	100	2
5640	5660	0	0	37	0	0	0	0	0	0	0	0	0	0	0	0	0	100	1
5641	5659	0	0	0	0	37	0	0	0	0	0	0	0	0	0	0	0	100	1
5642	5658	0	0	37	0	0	0	0	0	0	0	0	0	0	0	0	0	100	1
5643	5657	37	0	0	0	0	0	0	0	0	0	0	0	0	0	0	0	100	1
5644	5656	0	37	0	0	0	0	0	0	0	0	0	0	0	0	0	0	100	1
5645	5655	0	37	0	0	0	0	0	0	0	0	0	0	0	0	0	0	100	1
5646	5654	0	0	0	37	0	0	0	0	0	0	0	0	0	0	0	0	100	1
5647	5653	37	0	0	0	0	0	0	0	0	0	0	0	0	0	0	0	100	1
5669	5702	1	0	0	0	36	0	0	0	0	0	0	0	0	0	0	0	100	2
5670	5701	0	0	37	0	0	0	0	0	0	0	0	0	0	0	0	0	100	1
5671	5700	0	37	0	0	0	0	0	0	0	0	0	0	0	0	0	0	100	1
5672	5699	1	0	2	0	25	0	0	0	0	0	0	0	9	0	0	0	75.6757	3
5673	5698	0	0	0	0	37	0	0	0	0	0	0	0	0	0	0	0	100	1
5674	5697	0	0	37	0	0	0	0	0	0	0	0	0	0	0	0	0	100	1
5675	5696	0	13	0	0	0	23	0	0	0	1	0	0	0	0	0	0	97.2973	2
5676	5695	0	34	0	0	0	3	0	0	0	0	0	0	0	0	0	0	100	2
5677	5694	0	0	37	0	0	0	0	0	0	0	0	0	0	0	0	0	100	1
5680	5691	0	34	0	0	0	0	0	0	0	0	0	0	0	0	3	0	91.8919	1
5681	5690	0	0	0	37	0	0	0	0	0	0	0	0	0	0	0	0	100	1
5682	5689	37	0	0	0	0	0	0	0	0	0	0	0	0	0	0	0	100	1
5705	5736	0	0	37	0	0	0	0	0	0	0	0	0	0	0	0	0	100	1
5707	5734	37	0	0	0	0	0	0	0	0	0	0	0	0	0	0	0	100	1
5708	5733	0	30	0	0	0	7	0	0	0	0	0	0	0	0	0	0	100	2
5711	5729	37	0	0	0	0	0	0	0	0	0	0	0	0	0	0	0	100	1
5712	5728	0	0	35	0	0	0	0	2	0	0	0	0	0	0	0	0	94.5946	1
5717	5724	0	30	0	0	0	7	0	0	0	0	0	0	0	0	0	0	100	2
5718	5723	0	0	0	0	35	0	2	0	0	0	0	0	0	0	0	0	94.5946	1
5759	5770	0	0	0	0	37	0	0	0	0	0	0	0	0	0	0	0	100	1
5760	5769	37	0	0	0	0	0	0	0	0	0	0	0	0	0	0	0	100	1
5761	5768	0	0	0	3	0	34	0	0	0	0	0	0	0	0	0	0	100	2
5774	5787	0	36	0	0	0	1	0	0	0	0	0	0	0	0	0	0	100	2
5775	5786	0	0	37	0	0	0	0	0	0	0	0	0	0	0	0	0	100	1
5776	5785	0	0	0	0	37	0	0	0	0	0	0	0	0	0	0	0	100	1
5789	5831	37	0	0	0	0	0	0	0	0	0	0	0	0	0	0	0	100	1
5790	5830	0	0	37	0	0	0	0	0	0	0	0	0	0	0	0	0	100	1
5791	5829	0	37	0	0	0	0	0	0	0	0	0	0	0	0	0	0	100	1
5792	5828	0	0	34	0	0	0	0	0	0	0	0	0	3	0	0	0	91.8919	1
5793	5827	0	0	0	0	37	0	0	0	0	0	0	0	0	0	0	0	100	1
5794	5826	0	0	37	0	0	0	0	0	0	0	0	0	0	0	0	0	100	1
5795	5825	31	0	0	0	0	0	0	0	0	0	0	0	6	0	0	0	83.7838	1
5796	5824	0	0	0	37	0	0	0	0	0	0	0	0	0	0	0	0	100	1
5797	5823	0	0	0	0	0	37	0	0	0	0	0	0	0	0	0	0	100	1
5798	5822	0	24	0	0	0	13	0	0	0	0	0	0	0	0	0	0	100	2
5799	5821	0	37	0	0	0	0	0	0	0	0	0	0	0	0	0	0	100	1
5800	5820	0	0	36	0	0	0	0	0	0	0	1	0	0	0	0	0	97.2973	1
6014	6112	0	0	0	36	0	0	0	0	0	0	0	0	0	0	1	0	97.2973	1
6015	6111	37	0	0	0	0	0	0	0	0	0	0	0	0	0	0	0	100	1
6016	6110	37	0	0	0	0	0	0	0	0	0	0	0	0	0	0	0	100	1
6017	6109	0	0	37	0	0	0	0	0	0	0	0	0	0	0	0	0	100	1
6018	6108	37	0	0	0	0	0	0	0	0	0	0	0	0	0	0	0	100	1
6020	6106	0	0	0	37	0	0	0	0	0	0	0	0	0	0	0	0	100	1
6021	6105	0	0	0	0	37	0	0	0	0	0	0	0	0	0	0	0	100	1
6022	6104	0	0	27	0	0	0	0	0	0	0	0	0	10	0	0	0	72.973	1
6023	6103	0	0	0	0	37	0	0	0	0	0	0	0	0	0	0	0	100	1
6024	6102	0	0	0	37	0	0	0	0	0	0	0	0	0	0	0	0	100	1
6025	6101	0	0	21	0	0	0	0	0	0	0	0	0	16	0	0	0	56.7568	1
6026	6100	0	0	0	22	0	0	0	0	0	0	0	0	0	0	15	0	59.4595	1
6028	6099	0	0	0	37	0	0	0	0	0	0	0	0	0	0	0	0	100	1
6029	6098	37	0	0	0	0	0	0	0	0	0	0	0	0	0	0	0	100	1
6030	6097	0	0	0	37	0	0	0	0	0	0	0	0	0	0	0	0	100	1
6033	6093	37	0	0	0	0	0	0	0	0	0	0	0	0	0	0	0	100	1
6034	6092	21	0	0	0	16	0	0	0	0	0	0	0	0	0	0	0	100	2
6146	6251	37	0	0	0	0	0	0	0	0	0	0	0	0	0	0	0	100	1
6160	6248	0	28	0	0	0	0	0	0	0	0	0	0	0	0	9	0	75.6757	1
6161	6247	0	0	23	0	0	0	0	0	0	0	2	0	0	0	0	12	62.1622	1
6162	6246	35	0	0	0	2	0	0	0	0	0	0	0	0	0	0	0	100	2
6163	6245	0	37	0	0	0	0	0	0	0	0	0	0	0	0	0	0	100	1
6164	6244	0	35	0	0	0	2	0	0	0	0	0	0	0	0	0	0	100	2
6165	6243	0	0	37	0	0	0	0	0	0	0	0	0	0	0	0	0	100	1
6169	6239	0	0	22	0	0	0	0	1	0	0	0	0	14	0	0	0	59.4595	1
6170	6238	37	0	0	0	0	0	0	0	0	0	0	0	0	0	0	0	100	1
6171	6237	37	0	0	0	0	0	0	0	0	0	0	0	0	0	0	0	100	1
6172	6236	0	0	0	0	37	0	0	0	0	0	0	0	0	0	0	0	100	1
6173	6235	0	0	37	0	0	0	0	0	0	0	0	0	0	0	0	0	100	1
6174	6234	37	0	0	0	0	0	0	0	0	0	0	0	0	0	0	0	100	1
6175	6233	0	0	24	0	0	0	0	0	0	0	0	0	13	0	0	0	64.8649	1
6176	6190	37	0	0	0	0	0	0	0	0	0	0	0	0	0	0	0	100	1
6177	6189	0	0	0	37	0	0	0	0	0	0	0	0	0	0	0	0	100	1
6178	6188	0	0	0	0	0	37	0	0	0	0	0	0	0	0	0	0	100	1
6179	6187	0	29	0	0	0	8	0	0	0	0	0	0	0	0	0	0	100	2
6261	6352	0	0	0	0	37	0	0	0	0	0	0	0	0	0	0	0	100	1
6264	6349	0	0	0	37	0	0	0	0	0	0	0	0	0	0	0	0	100	1
6265	6348	0	37	0	0	0	0	0	0	0	0	0	0	0	0	0	0	100	1
6266	6347	0	0	0	37	0	0	0	0	0	0	0	0	0	0	0	0	100	1
6267	6346	37	0	0	0	0	0	0	0	0	0	0	0	0	0	0	0	100	1
6268	6345	0	37	0	0	0	0	0	0	0	0	0	0	0	0	0	0	100	1
6269	6344	0	23	0	0	0	0	0	0	0	0	0	0	0	0	14	0	62.1622	1
6270	6343	37	0	0	0	0	0	0	0	0	0	0	0	0	0	0	0	100	1
6271	6342	37	0	0	0	0	0	0	0	0	0	0	0	0	0	0	0	100	1
6279	6341	0	0	0	14	0	23	0	0	0	0	0	0	0	0	0	0	100	2
6280	6340	0	0	37	0	0	0	0	0	0	0	0	0	0	0	0	0	100	1
6281	6339	0	36	0	0	0	1	0	0	0	0	0	0	0	0	0	0	100	2
6282	6338	0	0	34	0	0	0	0	0	0	0	0	0	3	0	0	0	91.8919	1
6283	6337	0	37	0	0	0	0	0	0	0	0	0	0	0	0	0	0	100	1
6435	6524	0	0	0	23	0	14	0	0	0	0	0	0	0	0	0	0	100	2
6436	6523	0	37	0	0	0	0	0	0	0	0	0	0	0	0	0	0	100	1
6438	6521	0	0	0	0	0	37	0	0	0	0	0	0	0	0	0	0	100	1
6439	6520	0	0	0	37	0	0	0	0	0	0	0	0	0	0	0	0	100	1
6440	6519	0	37	0	0	0	0	0	0	0	0	0	0	0	0	0	0	100	1
6811	6915	0	0	0	37	0	0	0	0	0	0	0	0	0	0	0	0	100	1
6812	6914	23	0	0	0	0	0	14	0	0	0	0	0	0	0	0	0	62.1622	1
6813	6913	37	0	0	0	0	0	0	0	0	0	0	0	0	0	0	0	100	1
6814	6912	0	0	0	0	0	37	0	0	0	0	0	0	0	0	0	0	100	1
6815	6911	23	0	0	0	13	0	1	0	0	0	0	0	0	0	0	0	97.2973	2
6816	6910	37	0	0	0	0	0	0	0	0	0	0	0	0	0	0	0	100	1
6817	6909	0	0	0	37	0	0	0	0	0	0	0	0	0	0	0	0	100	1
7096	7154	0	37	0	0	0	0	0	0	0	0	0	0	0	0	0	0	100	1
7097	7153	0	0	36	0	1	0	0	0	0	0	0	0	0	0	0	0	100	2
7098	7152	0	0	0	37	0	0	0	0	0	0	0	0	0	0	0	0	100	1
7099	7151	0	0	22	0	0	0	0	0	0	0	0	0	15	0	0	0	59.4595	1
7100	7150	0	36	0	0	0	1	0	0	0	0	0	0	0	0	0	0	100	2
7101	7147	0	0	37	0	0	0	0	0	0	0	0	0	0	0	0	0	100	1
7102	7146	0	0	37	0	0	0	0	0	0	0	0	0	0	0	0	0	100	1
7103	7145	0	34	0	0	0	0	0	0	0	0	0	0	0	0	3	0	91.8919	1
7104	7144	0	0	37	0	0	0	0	0	0	0	0	0	0	0	0	0	100	1
7105	7143	0	0	23	0	0	0	0	0	0	0	0	0	14	0	0	0	62.1622	1
7106	7142	0	37	0	0	0	0	0	0	0	0	0	0	0	0	0	0	100	1
7108	7141	0	0	37	0	0	0	0	0	0	0	0	0	0	0	0	0	100	1
7109	7140	0	37	0	0	0	0	0	0	0	0	0	0	0	0	0	0	100	1
7110	7139	0	0	0	36	0	1	0	0	0	0	0	0	0	0	0	0	100	2
7111	7138	0	37	0	0	0	0	0	0	0	0	0	0	0	0	0	0	100	1
7112	7137	0	37	0	0	0	0	0	0	0	0	0	0	0	0	0	0	100	1
7117	7128	0	0	0	37	0	0	0	0	0	0	0	0	0	0	0	0	100	1
7118	7127	37	0	0	0	0	0	0	0	0	0	0	0	0	0	0	0	100	1
7119	7126	37	0	0	0	0	0	0	0	0	0	0	0	0	0	0	0	100	1
7120	7125	0	37	0	0	0	0	0	0	0	0	0	0	0	0	0	0	100	1
7155	7168	37	0	0	0	0	0	0	0	0	0	0	0	0	0	0	0	100	1
7156	7167	37	0	0	0	0	0	0	0	0	0	0	0	0	0	0	0	100	1
7157	7166	0	36	0	0	0	1	0	0	0	0	0	0	0	0	0	0	100	2
7158	7165	0	0	37	0	0	0	0	0	0	0	0	0	0	0	0	0	100	1
7176	7200	37	0	0	0	0	0	0	0	0	0	0	0	0	0	0	0	100	1
7177	7199	0	37	0	0	0	0	0	0	0	0	0	0	0	0	0	0	100	1
7178	7198	0	0	37	0	0	0	0	0	0	0	0	0	0	0	0	0	100	1
7179	7196	0	0	0	1	0	36	0	0	0	0	0	0	0	0	0	0	100	2
7180	7195	37	0	0	0	0	0	0	0	0	0	0	0	0	0	0	0	100	1
7181	7194	37	0	0	0	0	0	0	0	0	0	0	0	0	0	0	0	100	1
7182	7193	37	0	0	0	0	0	0	0	0	0	0	0	0	0	0	0	100	1
7183	7192	0	0	37	0	0	0	0	0	0	0	0	0	0	0	0	0	100	1
7184	7191	0	37	0	0	0	0	0	0	0	0	0	0	0	0	0	0	100	1
7185	7190	0	0	0	32	0	0	0	0	0	0	0	0	0	0	5	0	86.4865	1
7209	7214	37	0	0	0	0	0	0	0	0	0	0	0	0	0	0	0	100	1
7580	7636	0	0	37	0	0	0	0	0	0	0	0	0	0	0	0	0	100	1
7581	7635	0	37	0	0	0	0	0	0	0	0	0	0	0	0	0	0	100	1
7651	7755	0	0	0	0	37	0	0	0	0	0	0	0	0	0	0	0	100	1
7652	7754	0	34	0	0	0	3	0	0	0	0	0	0	0	0	0	0	100	2
7656	7665	37	0	0	0	0	0	0	0	0	0	0	0	0	0	0	0	100	1
7657	7664	0	0	0	37	0	0	0	0	0	0	0	0	0	0	0	0	100	1
7658	7663	0	27	0	0	0	10	0	0	0	0	0	0	0	0	0	0	100	2
7666	7748	31	0	0	0	6	0	0	0	0	0	0	0	0	0	0	0	100	2
7667	7747	0	0	0	37	0	0	0	0	0	0	0	0	0	0	0	0	100	1
7668	7746	0	0	0	0	37	0	0	0	0	0	0	0	0	0	0	0	100	1
7669	7745	23	0	0	0	14	0	0	0	0	0	0	0	0	0	0	0	100	2
7670	7744	23	0	0	0	0	0	0	0	0	0	0	0	14	0	0	0	62.1622	1
7671	7743	0	0	0	0	37	0	0	0	0	0	0	0	0	0	0	0	100	1
7672	7742	37	0	0	0	0	0	0	0	0	0	0	0	0	0	0	0	100	1
7673	7741	0	0	0	37	0	0	0	0	0	0	0	0	0	0	0	0	100	1
7674	7740	0	0	0	0	37	0	0	0	0	0	0	0	0	0	0	0	100	1
7675	7739	35	0	0	0	2	0	0	0	0	0	0	0	0	0	0	0	100	2
7676	7738	0	0	31	0	6	0	0	0	0	0	0	0	0	0	0	0	100	2
7677	7737	0	0	37	0	0	0	0	0	0	0	0	0	0	0	0	0	100	1
7678	7736	0	37	0	0	0	0	0	0	0	0	0	0	0	0	0	0	100	1
7679	7732	0	0	21	0	16	0	0	0	0	0	0	0	0	0	0	0	100	2
7680	7731	34	0	0	0	3	0	0	0	0	0	0	0	0	0	0	0	100	2
7681	7730	36	0	0	0	1	0	0	0	0	0	0	0	0	0	0	0	100	2
7685	7726	36	0	0	0	0	0	0	0	0	0	0	0	1	0	0	0	97.2973	1
7686	7725	0	0	37	0	0	0	0	0	0	0	0	0	0	0	0	0	100	1
7687	7724	0	37	0	0	0	0	0	0	0	0	0	0	0	0	0	0	100	1
7689	7721	0	37	0	0	0	0	0	0	0	0	0	0	0	0	0	0	100	1
7690	7720	0	0	0	37	0	0	0	0	0	0	0	0	0	0	0	0	100	1
7691	7719	33	0	0	0	0	0	0	0	0	0	0	0	4	0	0	0	89.1892	1
7692	7718	26	0	0	0	11	0	0	0	0	0	0	0	0	0	0	0	100	2
7695	7714	0	0	0	0	37	0	0	0	0	0	0	0	0	0	0	0	100	1
7696	7713	0	0	21	0	0	0	0	0	0	0	0	0	16	0	0	0	56.7568	1
7697	7712	31	0	0	0	6	0	0	0	0	0	0	0	0	0	0	0	100	2
7701	7711	0	0	0	0	0	37	0	0	0	0	0	0	0	0	0	0	100	1
7702	7710	37	0	0	0	0	0	0	0	0	0	0	0	0	0	0	0	100	1
7703	7709	27	0	0	0	10	0	0	0	0	0	0	0	0	0	0	0	100	2
7897	7968	0	0	0	37	0	0	0	0	0	0	0	0	0	0	0	0	100	1
7898	7967	0	23	0	0	0	11	0	0	0	0	0	0	0	3	0	0	91.8919	2
8039	8058	0	23	0	0	0	14	0	0	0	0	0	0	0	0	0	0	100	2
8040	8057	0	37	0	0	0	0	0	0	0	0	0	0	0	0	0	0	100	1
8041	8056	0	0	0	0	37	0	0	0	0	0	0	0	0	0	0	0	100	1
8042	8055	0	3	0	0	0	34	0	0	0	0	0	0	0	0	0	0	100	2
8043	8054	0	23	0	0	0	0	0	0	0	0	0	0	0	0	14	0	62.1622	1
8044	8053	0	0	0	0	0	37	0	0	0	0	0	0	0	0	0	0	100	1
8045	8052	0	15	0	0	0	22	0	0	0	0	0	0	0	0	0	0	100	2
8046	8051	0	0	37	0	0	0	0	0	0	0	0	0	0	0	0	0	100	1
8067	8088	0	37	0	0	0	0	0	0	0	0	0	0	0	0	0	0	100	1
8068	8087	0	0	37	0	0	0	0	0	0	0	0	0	0	0	0	0	100	1
8069	8086	0	15	0	0	0	22	0	0	0	0	0	0	0	0	0	0	100	2
8070	8085	0	0	37	0	0	0	0	0	0	0	0	0	0	0	0	0	100	1
8071	8084	0	0	0	0	0	37	0	0	0	0	0	0	0	0	0	0	100	1
8072	8083	37	0	0	0	0	0	0	0	0	0	0	0	0	0	0	0	100	1
8073	8082	36	0	0	0	1	0	0	0	0	0	0	0	0	0	0	0	100	2
8074	8081	0	36	0	0	0	0	0	0	0	0	0	0	0	0	1	0	97.2973	1
8089	8102	0	0	36	0	0	0	0	0	0	0	0	0	1	0	0	0	97.2973	1
8090	8101	0	34	0	0	0	3	0	0	0	0	0	0	0	0	0	0	100	2
8091	8100	0	0	37	0	0	0	0	0	0	0	0	0	0	0	0	0	100	1
8092	8099	0	37	0	0	0	0	0	0	0	0	0	0	0	0	0	0	100	1
8104	8126	0	0	37	0	0	0	0	0	0	0	0	0	0	0	0	0	100	1
8105	8125	0	35	0	0	0	2	0	0	0	0	0	0	0	0	0	0	100	2
8107	8124	0	0	0	37	0	0	0	0	0	0	0	0	0	0	0	0	100	1
8108	8123	0	0	33	0	0	0	0	0	0	0	0	0	3	0	0	1	89.1892	1
8109	8122	37	0	0	0	0	0	0	0	0	0	0	0	0	0	0	0	100	1
8110	8121	0	0	0	0	37	0	0	0	0	0	0	0	0	0	0	0	100	1
8111	8120	0	0	0	32	0	0	0	0	0	0	0	0	0	0	5	0	86.4865	1
8112	8119	37	0	0	0	0	0	0	0	0	0	0	0	0	0	0	0	100	1
8113	8118	0	0	37	0	0	0	0	0	0	0	0	0	0	0	0	0	100	1
8325	8420	0	0	0	0	0	37	0	0	0	0	0	0	0	0	0	0	100	1
8327	8418	0	25	0	0	0	12	0	0	0	0	0	0	0	0	0	0	100	2
8328	8417	0	0	0	37	0	0	0	0	0	0	0	0	0	0	0	0	100	1
8329	8416	37	0	0	0	0	0	0	0	0	0	0	0	0	0	0	0	100	1
8330	8415	37	0	0	0	0	0	0	0	0	0	0	0	0	0	0	0	100	1
8332	8413	0	0	0	0	0	37	0	0	0	0	0	0	0	0	0	0	100	1
8334	8411	0	0	0	0	0	37	0	0	0	0	0	0	0	0	0	0	100	1
8335	8410	0	37	0	0	0	0	0	0	0	0	0	0	0	0	0	0	100	1
8497	8515	0	0	0	37	0	0	0	0	0	0	0	0	0	0	0	0	100	1
8498	8514	0	37	0	0	0	0	0	0	0	0	0	0	0	0	0	0	100	1
8499	8513	0	0	37	0	0	0	0	0	0	0	0	0	0	0	0	0	100	1
8501	8511	0	0	0	31	0	0	0	0	0	0	0	0	0	0	6	0	83.7838	1
8502	8510	37	0	0	0	0	0	0	0	0	0	0	0	0	0	0	0	100	1
8522	8538	0	37	0	0	0	0	0	0	0	0	0	0	0	0	0	0	100	1
8523	8537	0	23	0	0	0	0	0	0	0	0	0	0	0	0	14	0	62.1622	1
8524	8536	37	0	0	0	0	0	0	0	0	0	0	0	0	0	0	0	100	1
8525	8535	0	36	0	0	0	1	0	0	0	0	0	0	0	0	0	0	100	2
8527	8534	22	0	9	0	5	0	0	0	0	0	0	0	0	0	1	0	97.2973	3
8528	8533	0	0	0	37	0	0	0	0	0	0	0	0	0	0	0	0	100	1
8543	8564	23	0	3	0	0	0	0	0	0	0	0	0	11	0	0	0	70.2703	2
8544	8563	0	0	0	37	0	0	0	0	0	0	0	0	0	0	0	0	100	1
8545	8562	37	0	0	0	0	0	0	0	0	0	0	0	0	0	0	0	100	1
8546	8561	37	0	0	0	0	0	0	0	0	0	0	0	0	0	0	0	100	1
8547	8560	0	0	0	37	0	0	0	0	0	0	0	0	0	0	0	0	100	1
8548	8559	0	0	0	37	0	0	0	0	0	0	0	0	0	0	0	0	100	1
8549	8558	0	22	0	6	0	0	0	0	0	0	0	0	0	0	9	0	75.6757	2
8550	8557	0	0	0	31	0	0	0	0	0	0	0	0	0	0	6	0	83.7838	1
8551	8556	0	0	0	0	0	37	0	0	0	0	0	0	0	0	0	0	100	1
8568	8598	0	0	0	0	0	37	0	0	0	0	0	0	0	0	0	0	100	1
8569	8597	0	0	23	0	0	0	0	0	0	0	0	0	14	0	0	0	62.1622	1
8570	8596	0	0	0	23	0	0	0	0	0	0	0	0	0	0	14	0	62.1622	1
8571	8595	0	0	37	0	0	0	0	0	0	0	0	0	0	0	0	0	100	1
8572	8594	36	0	0	0	0	0	0	0	0	0	0	0	0	0	0	0	100	1
8575	8589	0	37	0	0	0	0	0	0	0	0	0	0	0	0	0	0	100	1
8576	8588	0	0	36	0	0	0	0	0	0	0	0	0	1	0	0	0	97.2973	1
8577	8587	0	0	0	37	0	0	0	0	0	0	0	0	0	0	0	0	100	1
8578	8586	37	0	0	0	0	0	0	0	0	0	0	0	0	0	0	0	100	1
8579	8585	37	0	0	0	0	0	0	0	0	0	0	0	0	0	0	0	100	1
8600	8617	22	0	0	0	0	0	0	0	0	0	0	0	14	1	0	0	59.4595	1
8601	8616	0	0	0	0	37	0	0	0	0	0	0	0	0	0	0	0	100	1
8602	8615	0	30	0	0	0	0	0	0	0	0	0	0	0	0	7	0	81.0811	1
8603	8614	0	37	0	0	0	0	0	0	0	0	0	0	0	0	0	0	100	1
8604	8613	0	36	0	0	0	0	0	0	0	1	0	0	0	0	0	0	97.2973	1
8624	8666	0	23	0	0	0	11	0	3	0	0	0	0	0	0	0	0	91.8919	2
9055	9137	0	0	35	0	0	0	0	2	0	0	0	0	0	0	0	0	94.5946	1
9056	9136	0	0	37	0	0	0	0	0	0	0	0	0	0	0	0	0	100	1
9057	9135	37	0	0	0	0	0	0	0	0	0	0	0	0	0	0	0	100	1
9058	9134	32	0	0	0	3	0	2	0	0	0	0	0	0	0	0	0	94.5946	2
9059	9133	24	0	0	0	0	0	0	0	0	0	0	0	13	0	0	0	64.8649	1
9060	9128	23	0	0	0	14	0	0	0	0	0	0	0	0	0	0	0	100	2
9061	9127	0	0	37	0	0	0	0	0	0	0	0	0	0	0	0	0	100	1
9062	9126	0	0	31	0	6	0	0	0	0	0	0	0	0	0	0	0	100	2
9063	9124	0	0	0	37	0	0	0	0	0	0	0	0	0	0	0	0	100	1
9064	9123	0	0	0	0	0	37	0	0	0	0	0	0	0	0	0	0	100	1
9065	9122	0	14	0	22	0	1	0	0	0	0	0	0	0	0	0	0	100	3
9066	9121	0	0	0	0	37	0	0	0	0	0	0	0	0	0	0	0	100	1
9067	9120	25	0	0	0	12	0	0	0	0	0	0	0	0	0	0	0	100	2
9068	9119	6	0	21	0	5	0	0	0	0	0	0	0	5	0	0	0	86.4865	3
9069	9118	0	0	37	0	0	0	0	0	0	0	0	0	0	0	0	0	100	1
9070	9117	0	0	37	0	0	0	0	0	0	0	0	0	0	0	0	0	100	1
9071	9113	0	0	0	0	23	0	0	0	0	0	0	0	14	0	0	0	62.1622	1
9072	9112	37	0	0	0	0	0	0	0	0	0	0	0	0	0	0	0	100	1
9073	9111	0	37	0	0	0	0	0	0	0	0	0	0	0	0	0	0	100	1
9074	9110	0	23	0	0	0	0	0	0	14	0	0	0	0	0	0	0	62.1622	1
9081	9106	0	0	37	0	0	0	0	0	0	0	0	0	0	0	0	0	100	1
9082	9105	23	0	0	0	14	0	0	0	0	0	0	0	0	0	0	0	100	2
9083	9104	0	36	0	0	0	1	0	0	0	0	0	0	0	0	0	0	100	2
9084	9103	0	37	0	0	0	0	0	0	0	0	0	0	0	0	0	0	100	1
9085	9102	0	0	0	0	37	0	0	0	0	0	0	0	0	0	0	0	100	1
9086	9101	0	36	0	0	0	1	0	0	0	0	0	0	0	0	0	0	100	2
9087	9096	0	0	0	0	37	0	0	0	0	0	0	0	0	0	0	0	100	1
9088	9095	0	37	0	0	0	0	0	0	0	0	0	0	0	0	0	0	100	1
9089	9094	0	34	0	0	0	0	0	3	0	0	0	0	0	0	0	0	91.8919	1
9139	9156	37	0	0	0	0	0	0	0	0	0	0	0	0	0	0	0	100	1
9140	9155	1	0	24	0	2	0	0	0	0	0	0	0	10	0	0	0	72.973	3
9141	9154	0	0	0	37	0	0	0	0	0	0	0	0	0	0	0	0	100	1
9142	9153	0	0	0	0	0	37	0	0	0	0	0	0	0	0	0	0	100	1
9143	9152	0	35	0	2	0	0	0	0	0	0	0	0	0	0	0	0	100	2
9144	9151	0	0	0	35	0	0	0	0	0	0	0	0	0	0	2	0	94.5946	1
9145	9150	0	0	0	0	0	37	0	0	0	0	0	0	0	0	0	0	100	1
9263	9313	0	0	0	31	0	0	0	0	0	0	0	0	0	0	6	0	83.7838	1
9265	9311	0	34	0	0	0	0	0	0	0	0	0	0	0	0	3	0	91.8919	1
9266	9310	0	0	36	0	0	0	0	0	0	0	1	0	0	0	0	0	97.2973	1
9267	9309	36	0	0	0	1	0	0	0	0	0	0	0	0	0	0	0	100	2
9268	9308	0	0	37	0	0	0	0	0	0	0	0	0	0	0	0	0	100	1
9269	9307	0	0	0	37	0	0	0	0	0	0	0	0	0	0	0	0	100	1
9270	9304	0	0	0	0	37	0	0	0	0	0	0	0	0	0	0	0	100	1
9271	9303	0	0	37	0	0	0	0	0	0	0	0	0	0	0	0	0	100	1
9272	9302	0	36	0	0	0	1	0	0	0	0	0	0	0	0	0	0	100	2
9274	9301	0	23	0	0	0	0	0	0	0	0	0	0	0	0	14	0	62.1622	1
9275	9300	0	0	0	29	0	0	0	0	1	0	0	0	0	0	7	0	78.3784	1
9276	9299	26	0	0	0	11	0	0	0	0	0	0	0	0	0	0	0	100	2
9277	9298	0	37	0	0	0	0	0	0	0	0	0	0	0	0	0	0	100	1
9278	9297	0	0	0	37	0	0	0	0	0	0	0	0	0	0	0	0	100	1
9279	9296	18	0	0	0	19	0	0	0	0	0	0	0	0	0	0	0	100	2
9280	9295	0	0	0	0	37	0	0	0	0	0	0	0	0	0	0	0	100	1
9282	9292	0	0	0	0	0	37	0	0	0	0	0	0	0	0	0	0	100	1
9283	9291	37	0	0	0	0	0	0	0	0	0	0	0	0	0	0	0	100	1
9284	9290	37	0	0	0	0	0	0	0	0	0	0	0	0	0	0	0	100	1
9285	9289	37	0	0	0	0	0	0	0	0	0	0	0	0	0	0	0	100	1
9321	9351	37	0	0	0	0	0	0	0	0	0	0	0	0	0	0	0	100	1
9322	9350	0	37	0	0	0	0	0	0	0	0	0	0	0	0	0	0	100	1
9323	9349	0	8	0	0	0	29	0	0	0	0	0	0	0	0	0	0	100	2
9324	9348	0	29	0	0	0	8	0	0	0	0	0	0	0	0	0	0	100	2
9325	9347	0	0	0	37	0	0	0	0	0	0	0	0	0	0	0	0	100	1
9328	9345	0	0	0	23	0	14	0	0	0	0	0	0	0	0	0	0	100	2
9329	9344	0	19	0	0	0	10	0	0	0	0	1	0	0	0	7	0	78.3784	2
9331	9342	0	37	0	0	0	0	0	0	0	0	0	0	0	0	0	0	100	1
9332	9341	0	33	0	0	0	4	0	0	0	0	0	0	0	0	0	0	100	2
9333	9340	0	0	37	0	0	0	0	0	0	0	0	0	0	0	0	0	100	1
9356	9410	23	0	7	0	0	0	0	0	0	0	0	0	7	0	0	0	81.0811	2
9357	9409	0	0	7	0	30	0	0	0	0	0	0	0	0	0	0	0	100	2
9358	9408	0	37	0	0	0	0	0	0	0	0	0	0	0	0	0	0	100	1
9359	9407	0	23	0	0	0	14	0	0	0	0	0	0	0	0	0	0	100	2
9360	9406	0	0	0	23	0	0	0	0	0	0	0	0	0	0	14	0	62.1622	1
9361	9405	0	0	0	37	0	0	0	0	0	0	0	0	0	0	0	0	100	1
9362	9371	31	0	1	0	4	0	0	0	0	0	0	0	1	0	0	0	97.2973	3
9363	9370	37	0	0	0	0	0	0	0	0	0	0	0	0	0	0	0	100	1
9364	9369	0	37	0	0	0	0	0	0	0	0	0	0	0	0	0	0	100	1
9586	9608	23	0	0	0	0	0	14	0	0	0	0	0	0	0	0	0	62.1622	1
9750	9827	36	0	0	0	1	0	0	0	0	0	0	0	0	0	0	0	100	2
9751	9826	0	0	37	0	0	0	0	0	0	0	0	0	0	0	0	0	100	1
9752	9825	29	0	0	0	0	0	0	0	0	0	0	0	8	0	0	0	78.3784	1
9753	9823	0	0	0	37	0	0	0	0	0	0	0	0	0	0	0	0	100	1
9754	9822	31	0	0	0	6	0	0	0	0	0	0	0	0	0	0	0	100	2
9755	9821	23	0	0	0	0	0	0	0	0	14	0	0	0	0	0	0	62.1622	1
9767	9808	0	0	0	37	0	0	0	0	0	0	0	0	0	0	0	0	100	1
9768	9807	37	0	0	0	0	0	0	0	0	0	0	0	0	0	0	0	100	1
9769	9806	37	0	0	0	0	0	0	0	0	0	0	0	0	0	0	0	100	1
9771	9805	0	0	0	37	0	0	0	0	0	0	0	0	0	0	0	0	100	1
9772	9804	37	0	0	0	0	0	0	0	0	0	0	0	0	0	0	0	100	1
9773	9803	34	0	0	0	3	0	0	0	0	0	0	0	0	0	0	0	100	2
9774	9802	23	0	0	0	0	0	0	0	0	0	0	0	14	0	0	0	62.1622	1
9775	9801	0	0	23	0	14	0	0	0	0	0	0	0	0	0	0	0	100	2
9776	9799	0	37	0	0	0	0	0	0	0	0	0	0	0	0	0	0	100	1
9777	9798	0	0	37	0	0	0	0	0	0	0	0	0	0	0	0	0	100	1
9778	9797	0	0	22	0	0	0	0	0	0	0	0	0	15	0	0	0	59.4595	1
9782	9793	37	0	0	0	0	0	0	0	0	0	0	0	0	0	0	0	100	1
9783	9792	37	0	0	0	0	0	0	0	0	0	0	0	0	0	0	0	100	1
9784	9791	0	0	23	0	0	0	0	0	0	0	0	0	14	0	0	0	62.1622	1
9785	9790	0	0	35	0	2	0	0	0	0	0	0	0	0	0	0	0	100	2
9982	10039	37	0	0	0	0	0	0	0	0	0	0	0	0	0	0	0	100	1
9983	10038	23	0	0	0	0	0	0	0	0	0	0	0	14	0	0	0	62.1622	1
9984	10037	1	0	0	0	23	0	12	0	0	1	0	0	0	0	0	0	64.8649	2
9985	10036	0	0	37	0	0	0	0	0	0	0	0	0	0	0	0	0	100	1
9986	10035	0	36	0	0	0	1	0	0	0	0	0	0	0	0	0	0	100	2
9987	10034	0	37	0	0	0	0	0	0	0	0	0	0	0	0	0	0	100	1
9988	10033	0	0	0	0	0	37	0	0	0	0	0	0	0	0	0	0	100	1
9990	10029	0	37	0	0	0	0	0	0	0	0	0	0	0	0	0	0	100	1
9991	10028	1	0	0	0	36	0	0	0	0	0	0	0	0	0	0	0	100	2
9992	10027	0	0	37	0	0	0	0	0	0	0	0	0	0	0	0	0	100	1
9993	10026	0	36	0	0	0	0	0	0	0	0	0	0	0	0	1	0	97.2973	1
9996	10009	0	0	37	0	0	0	0	0	0	0	0	0	0	0	0	0	100	1
9997	10008	0	0	0	37	0	0	0	0	0	0	0	0	0	0	0	0	100	1
9998	10007	34	0	0	0	3	0	0	0	0	0	0	0	0	0	0	0	100	2
9999	10006	37	0	0	0	0	0	0	0	0	0	0	0	0	0	0	0	100	1
10000	10005	0	37	0	0	0	0	0	0	0	0	0	0	0	0	0	0	100	1
10056	10089	0	0	0	37	0	0	0	0	0	0	0	0	0	0	0	0	100	1
10057	10088	30	0	0	0	7	0	0	0	0	0	0	0	0	0	0	0	100	2
10058	10087	37	0	0	0	0	0	0	0	0	0	0	0	0	0	0	0	100	1
10059	10086	0	0	0	37	0	0	0	0	0	0	0	0	0	0	0	0	100	1
10060	10085	0	37	0	0	0	0	0	0	0	0	0	0	0	0	0	0	100	1
10061	10084	0	0	37	0	0	0	0	0	0	0	0	0	0	0	0	0	100	1
10063	10083	0	0	0	37	0	0	0	0	0	0	0	0	0	0	0	0	100	1
10064	10082	0	37	0	0	0	0	0	0	0	0	0	0	0	0	0	0	100	1
10065	10081	0	37	0	0	0	0	0	0	0	0	0	0	0	0	0	0	100	1
10066	10080	0	0	37	0	0	0	0	0	0	0	0	0	0	0	0	0	100	1
10067	10079	0	0	0	33	0	0	0	0	0	0	0	0	0	0	4	0	89.1892	1
10101	10119	0	37	0	0	0	0	0	0	0	0	0	0	0	0	0	0	100	1
10102	10118	0	0	0	37	0	0	0	0	0	0	0	0	0	0	0	0	100	1
10219	10229	0	35	0	0	0	0	0	1	0	0	0	0	0	0	1	0	94.5946	1
10220	10228	0	14	0	0	0	23	0	0	0	0	0	0	0	0	0	0	100	2
10221	10227	0	36	0	0	0	0	0	1	0	0	0	0	0	0	0	0	97.2973	1
10222	10226	0	0	0	37	0	0	0	0	0	0	0	0	0	0	0	0	100	1
10237	10288	0	37	0	0	0	0	0	0	0	0	0	0	0	0	0	0	100	1
10238	10286	23	0	0	0	0	0	0	0	0	0	3	10	0	1	0	0	62.1622	1
10239	10285	0	36	0	0	0	0	0	0	0	0	0	0	0	0	0	1	97.2973	1
10240	10284	37	0	0	0	0	0	0	0	0	0	0	0	0	0	0	0	100	1
10241	10283	0	36	0	0	0	1	0	0	0	0	0	0	0	0	0	0	100	2
10242	10282	0	0	37	0	0	0	0	0	0	0	0	0	0	0	0	0	100	1
10243	10281	0	35	0	0	0	0	0	0	0	0	0	0	0	0	2	0	94.5946	1
10244	10280	0	35	0	0	0	2	0	0	0	0	0	0	0	0	0	0	100	2
10245	10279	0	0	37	0	0	0	0	0	0	0	0	0	0	0	0	0	100	1
10250	10274	37	0	0	0	0	0	0	0	0	0	0	0	0	0	0	0	100	1
10251	10273	0	0	0	0	37	0	0	0	0	0	0	0	0	0	0	0	100	1
10252	10272	0	37	0	0	0	0	0	0	0	0	0	0	0	0	0	0	100	1
10253	10271	0	0	0	37	0	0	0	0	0	0	0	0	0	0	0	0	100	1
10254	10270	37	0	0	0	0	0	0	0	0	0	0	0	0	0	0	0	100	1
10294	10368	0	0	0	0	0	37	0	0	0	0	0	0	0	0	0	0	100	1
10295	10367	0	0	30	0	0	0	0	0	0	0	0	0	7	0	0	0	81.0811	1
10296	10366	37	0	0	0	0	0	0	0	0	0	0	0	0	0	0	0	100	1
10297	10365	37	0	0	0	0	0	0	0	0	0	0	0	0	0	0	0	100	1
10298	10364	0	0	0	37	0	0	0	0	0	0	0	0	0	0	0	0	100	1
10299	10363	37	0	0	0	0	0	0	0	0	0	0	0	0	0	0	0	100	1
10315	10362	0	0	0	37	0	0	0	0	0	0	0	0	0	0	0	0	100	1
10316	10361	15	0	0	0	22	0	0	0	0	0	0	0	0	0	0	0	100	2
10317	10360	37	0	0	0	0	0	0	0	0	0	0	0	0	0	0	0	100	1
10318	10359	0	0	37	0	0	0	0	0	0	0	0	0	0	0	0	0	100	1
10319	10358	0	36	0	0	0	1	0	0	0	0	0	0	0	0	0	0	100	2
10322	10357	0	31	0	0	0	6	0	0	0	0	0	0	0	0	0	0	100	2
10323	10356	0	34	0	0	0	3	0	0	0	0	0	0	0	0	0	0	100	2
10324	10355	0	0	0	37	0	0	0	0	0	0	0	0	0	0	0	0	100	1
10326	10354	0	0	0	37	0	0	0	0	0	0	0	0	0	0	0	0	100	1
10327	10353	0	37	0	0	0	0	0	0	0	0	0	0	0	0	0	0	100	1
10328	10350	0	37	0	0	0	0	0	0	0	0	0	0	0	0	0	0	100	1
10329	10349	0	0	37	0	0	0	0	0	0	0	0	0	0	0	0	0	100	1
10330	10348	0	37	0	0	0	0	0	0	0	0	0	0	0	0	0	0	100	1
10331	10347	0	36	0	0	0	1	0	0	0	0	0	0	0	0	0	0	100	2
10332	10346	0	37	0	0	0	0	0	0	0	0	0	0	0	0	0	0	100	1
10333	10345	0	0	37	0	0	0	0	0	0	0	0	0	0	0	0	0	100	1
10334	10344	0	0	33	0	4	0	0	0	0	0	0	0	0	0	0	0	100	2
10335	10343	37	0	0	0	0	0	0	0	0	0	0	0	0	0	0	0	100	1
10336	10342	0	0	0	37	0	0	0	0	0	0	0	0	0	0	0	0	100	1
10371	10404	27	0	0	0	0	0	0	0	0	0	0	0	0	0	0	0	100	1
10374	10401	0	20	0	0	0	7	0	0	0	0	0	0	0	0	0	0	100	2
10375	10400	0	0	0	27	0	0	0	0	0	0	0	0	0	0	0	0	100	1
10376	10399	26	0	0	0	0	0	0	0	0	0	0	0	1	0	0	0	96.2963	1
10379	10396	0	0	27	0	0	0	0	0	0	0	0	0	0	0	0	0	100	1
10380	10395	0	0	0	0	27	0	0	0	0	0	0	0	0	0	0	0	100	1
10381	10394	0	27	0	0	0	0	0	0	0	0	0	0	0	0	0	0	100	1
10382	10393	0	0	27	0	0	0	0	0	0	0	0	0	0	0	0	0	100	1
10383	10392	0	9	0	1	0	0	0	0	0	0	0	0	0	0	17	0	37.037	2
10410	10447	22	0	0	0	0	0	0	0	0	0	0	0	0	0	0	0	100	1
10413	10444	0	0	26	0	0	0	0	0	0	0	0	0	0	0	0	0	100	1
10414	10440	27	0	0	0	0	0	0	0	0	0	0	0	0	0	0	0	100	1
10415	10439	0	27	0	0	0	0	0	0	0	0	0	0	0	0	0	0	100	1
10416	10436	0	27	0	0	0	0	0	0	0	0	0	0	0	0	0	0	100	1
10417	10435	0	0	27	0	0	0	0	0	0	0	0	0	0	0	0	0	100	1
10418	10434	0	27	0	0	0	0	0	0	0	0	0	0	0	0	0	0	100	1
10419	10433	0	0	27	0	0	0	0	0	0	0	0	0	0	0	0	0	100	1
10420	10432	27	0	0	0	0	0	0	0	0	0	0	0	0	0	0	0	100	1
10421	10431	0	19	0	0	0	8	0	0	0	0	0	0	0	0	0	0	100	2
10422	10430	0	0	0	27	0	0	0	0	0	0	0	0	0	0	0	0	100	1
10423	10429	0	0	0	27	0	0	0	0	0	0	0	0	0	0	0	0	100	1
10451	10466	0	24	0	0	0	1	0	0	0	0	0	0	0	0	0	0	100	2
10452	10465	0	25	0	0	0	0	0	0	0	0	0	0	0	0	0	0	100	1
10453	10464	0	25	0	0	0	0	0	0	0	0	0	0	0	0	0	0	100	1
10454	10463	0	0	25	0	0	0	0	0	0	0	0	0	0	0	0	0	100	1
10455	10462	25	0	0	0	0	0	0	0	0	0	0	0	0	0	0	0	100	1
10562	10575	25	0	0	0	0	0	0	0	0	0	0	0	0	0	0	0	100	1
10563	10574	0	25	0	0	0	0	0	0	0	0	0	0	0	0	0	0	100	1
10564	10573	25	0	0	0	0	0	0	0	0	0	0	0	0	0	0	0	100	1
10565	10572	0	25	0	0	0	0	0	0	0	0	0	0	0	0	0	0	100	1
10566	10571	0	0	0	8	0	17	0	0	0	0	0	0	0	0	0	0	100	2
10576	10611	0	0	25	0	0	0	0	0	0	0	0	0	0	0	0	0	100	1
10577	10610	25	0	0	0	0	0	0	0	0	0	0	0	0	0	0	0	100	1
10578	10609	25	0	0	0	0	0	0	0	0	0	0	0	0	0	0	0	100	1
10580	10607	0	0	0	25	0	0	0	0	0	0	0	0	0	0	0	0	100	1
10581	10606	25	0	0	0	0	0	0	0	0	0	0	0	0	0	0	0	100	1
10582	10605	25	0	0	0	0	0	0	0	0	0	0	0	0	0	0	0	100	1
10583	10604	25	0	0	0	0	0	0	0	0	0	0	0	0	0	0	0	100	1
10588	10603	25	0	0	0	0	0	0	0	0	0	0	0	0	0	0	0	100	1
10589	10602	0	0	25	0	0	0	0	0	0	0	0	0	0	0	0	0	100	1
10590	10601	0	0	25	0	0	0	0	0	0	0	0	0	0	0	0	0	100	1
10591	10600	25	0	0	0	0	0	0	0	0	0	0	0	0	0	0	0	100	1
10592	10599	25	0	0	0	0	0	0	0	0	0	0	0	0	0	0	0	100	1
10593	10598	0	0	0	25	0	0	0	0	0	0	0	0	0	0	0	0	100	1
10618	10685	0	0	0	0	0	15	0	0	0	0	0	0	0	0	0	0	100	1
10619	10684	15	0	0	0	0	0	0	0	0	0	0	0	0	0	0	0	100	1
10620	10683	15	0	0	0	0	0	0	0	0	0	0	0	0	0	0	0	100	1
10621	10682	15	0	0	0	0	0	0	0	0	0	0	0	0	0	0	0	100	1
10622	10681	15	0	0	0	0	0	0	0	0	0	0	0	0	0	0	0	100	1
10623	10659	0	25	0	0	0	0	0	0	0	0	0	0	0	0	0	0	100	1
10624	10658	0	24	0	0	0	0	0	0	0	0	0	0	0	0	1	0	96	1
10625	10657	0	0	0	25	0	0	0	0	0	0	0	0	0	0	0	0	100	1
10629	10653	0	25	0	0	0	0	0	0	0	0	0	0	0	0	0	0	100	1
10630	10652	0	0	0	25	0	0	0	0	0	0	0	0	0	0	0	0	100	1
10631	10651	25	0	0	0	0	0	0	0	0	0	0	0	0	0	0	0	100	1
10632	10650	25	0	0	0	0	0	0	0	0	0	0	0	0	0	0	0	100	1
10633	10649	0	0	24	0	0	0	0	0	0	0	0	0	1	0	0	0	96	1
10634	10648	25	0	0	0	0	0	0	0	0	0	0	0	0	0	0	0	100	1
10635	10647	0	0	25	0	0	0	0	0	0	0	0	0	0	0	0	0	100	1
10636	10646	0	0	0	18	0	0	0	0	0	0	0	0	0	0	7	0	72	1
10637	10645	0	17	0	8	0	0	0	0	0	0	0	0	0	0	0	0	100	2
10667	10680	15	0	0	0	0	0	0	0	0	0	0	0	0	0	0	0	100	1
10668	10679	15	0	0	0	0	0	0	0	0	0	0	0	0	0	0	0	100	1
10669	10678	0	0	0	18	0	0	0	0	0	0	0	0	0	0	0	0	100	1
10670	10677	0	0	0	0	0	24	0	0	0	0	0	0	0	0	0	0	100	1
10692	10701	15	0	0	0	0	0	0	0	0	0	0	0	0	0	0	0	100	1
10693	10700	0	15	0	0	0	0	0	0	0	0	0	0	0	0	0	0	100	1
10711	10724	0	13	0	0	0	0	0	0	0	0	0	0	0	0	0	0	100	1
10712	10723	0	0	0	15	0	0	0	0	0	0	0	0	0	0	0	0	100	1
10713	10722	15	0	0	0	0	0	0	0	0	0	0	0	0	0	0	0	100	1
10714	10721	15	0	0	0	0	0	0	0	0	0	0	0	0	0	0	0	100	1
10725	10807	0	0	4	0	0	0	0	0	0	0	0	0	3	0	0	0	57.1429	1
10726	10806	4	0	0	0	3	0	0	0	0	0	0	0	0	0	0	0	100	2
10727	10805	0	0	7	0	0	0	0	0	0	0	0	0	0	0	0	0	100	1
10728	10804	0	4	0	0	0	0	0	0	0	0	0	0	0	0	0	3	57.1429	1
10730	10803	0	7	0	0	0	0	0	0	0	0	0	0	0	0	0	0	100	1
10731	10802	0	7	0	0	0	0	0	0	0	0	0	0	0	0	0	0	100	1
10732	10801	0	0	7	0	0	0	0	0	0	0	0	0	0	0	0	0	100	1
10733	10800	0	0	0	9	0	0	0	0	0	0	0	0	0	0	0	0	100	1
10734	10799	9	0	0	0	0	0	0	0	0	0	0	0	0	0	0	0	100	1
10736	10797	0	0	0	0	8	0	0	0	0	0	0	0	1	0	0	0	88.8889	1
10737	10796	0	0	0	10	0	0	0	0	0	0	0	0	0	0	0	0	100	1
10738	10795	0	0	0	10	0	0	0	0	0	0	0	0	0	0	0	0	100	1
10739	10794	0	0	0	9	0	1	0	0	0	0	0	0	0	0	0	0	100	2
10740	10793	0	10	0	0	0	0	0	0	0	0	0	0	0	0	0	0	100	1
10741	10792	0	10	0	0	0	0	0	0	0	0	0	0	0	0	0	1	90.9091	1
10743	10791	0	11	0	0	0	0	0	0	0	0	0	0	0	0	0	0	100	1
10744	10790	0	11	0	0	0	0	0	0	0	0	0	0	0	0	0	0	100	1
10745	10789	0	0	11	0	0	0	0	0	0	0	0	0	0	0	0	0	100	1
10746	10788	0	11	0	0	0	0	0	0	0	0	0	0	0	0	0	0	100	1
10747	10787	0	0	0	0	10	0	0	0	0	0	0	0	1	0	0	0	90.9091	1
10748	10786	0	11	0	0	0	0	0	0	0	0	0	0	0	0	0	0	100	1
10749	10785	0	0	0	2	0	8	0	0	0	0	0	0	0	0	1	0	90.9091	2
10750	10784	11	0	0	0	0	0	0	0	0	0	0	0	0	0	0	0	100	1
10751	10783	11	0	0	0	0	0	0	0	0	0	0	0	0	0	0	0	100	1
10752	10782	0	11	0	0	0	0	0	0	0	0	0	0	0	0	0	0	100	1
10753	10781	0	11	0	0	0	0	0	0	0	0	0	0	0	0	0	0	100	1
10754	10780	11	0	0	0	0	0	0	0	0	0	0	0	0	0	0	0	100	1
10755	10779	0	11	0	0	0	0	0	0	0	0	0	0	0	0	0	0	100	1
10756	10778	0	11	0	0	0	0	0	0	0	0	0	0	0	0	0	0	100	1
10758	10770	11	0	0	0	0	0	0	0	0	0	0	1	0	0	0	0	91.6667	1
10759	10769	11	0	0	0	0	0	0	0	0	0	1	0	0	0	0	0	91.6667	1
10760	10768	0	11	0	0	0	0	0	0	1	0	0	0	0	0	0	0	91.6667	1
