# Supplementary material for: ScanFold: an approach for genome-wide discovery of local RNA structural elements—applications to Zika virus and HIV
Source: PeerJ. 2018 Dec 18;6:e6136. doi: 10.7717/peerj.6136 (PMC6317755; doi:10.7717/peerj.6136)
Supplement: Supplemental Information 14 — The structures and sequences were uploaded to the server as shown, and scorer was run with default settings. [file peerj-06-6136-s014.xlsx]

## Sheet: Sheet1
	KJ776791.2 3UTR Structured Region
	Sequence:	GUGCUGUAAGCACCAAUCUUAGUGUUGUCAGGCCUGCUAGUCAGCCACAGCUUGGGGAAAGCUGUGCAGCCUGUGACCCCCCCAGGAGAAGCUGGGAAACCAAGCCUAUAGUCAGGCCGAGAACGCCAUGGCACGGAAGAAGCCAUGCUGCCUGUGAGCCCCUCAGAGGACACUGAGUCAAAAAACCCCACGCGCUUGGAGGCGCAGGAUGGGAAAAGAAGGUGGCGACCUUCCCCACCCUUCAAUCUGGGGCCUGAACUGGAGAUCAGCUGUGGAUCUCCAGAAGAGGGACUAGUGGUUAGAGGAGACCCCCCGGAAAACGCAAAACAGCAUAUUGACGCUGGGAAAGACCAGAGACUCCAUGAGUUUCCACCACGCUGGCCGCCAGGCACAGAUCGC…
	Accepted DBN:	............................((((((((.....))).(((((((......).))))))..))))).......(((((......)))))................(((((((....)).((((((.........))))))..))))).......(((((......)))))..............(((((....))))).((.((((....((((((....))))))))))))......((((((((((...(((((((((.......)))))))))...))).......((((......))))))))))).......................((((......))))((((.(((((.((((((.((((((((((((((.(((.......))…
		Scanfold
	Predicted DBN:	(..(((..(((((........)))))..)))..).....(..(((((((((((.....))))))))..))...)..)...(((((......)))))...............................(((((.........)))))..(((((.((((...)))).))).))...................(((((....)))))(((.((((....((((((....)))))))))).)))......((((((((...(((((((((.......)))))))))...))).......((((......)))))))))......((......)).........((((......))))((((.(((((.((((((.((((((((((((((.(((.......))…
	PPV	78.6325
	Sensitivity	79.8246
	F-measure	0.79224
	KJ776791.2 5UTR Structured Region
	Sequence:	AGUUGUUGAUCUGUGUGAAUCAGACUGCGACAGUUCGAGUUUGAAGCGAAAGCUAGCAACAGUAUCAACAGGUUUUAUUUUGGAUUUGGAAACGAGAGUUUCUGGUCAUGAAAAACCCAAAAAAGAAAUCCGGAGGAUUCCGGAUUGUCAAUAUGCUAAAACGCGGAGUAGCCCGUGUGAGCCCCUUUGGGGGCUUGAAGAGGCUGCCAGCCGGACUUCUGCUGGGUCAUGGGCCCAUCAGGAUGGUCUUGGCGAUUCUAGCCUUU
	Accepted DBN:	...(((((((((((((...(((((((.(((....))))))))))(((....))).))).))).))))))).((((...((((...((((((((....))))))))...))))))))..........((((((((....))))))))..............((((((......))))))(((((((...).)))))).............((((((((((((.((((((...)))))).))))..)))).)))).............
		Scanfold
	Predicted DBN:	...(((((((((((.....(((((((.(((....))))))))))(((....)))....)))).)))))))((((((.((.(((..((((((((....))))))))))).)))))))).......((((((((((....)))))))).))...........((((((......))))))(((((((....)))))))..((.(((((...((((((((((((.((((((...)))))).))))..)))).)))).....))))).))
	PPV	82.4176
	Sensitivity	92.5926
	F-measure	0.872093
