# Supplementary material for: ScanFold: an approach for genome-wide discovery of local RNA structural elements—applications to Zika virus and HIV
Source: PeerJ journal article supplement (doi:10.7717/peerj.6136), 2018-12-18

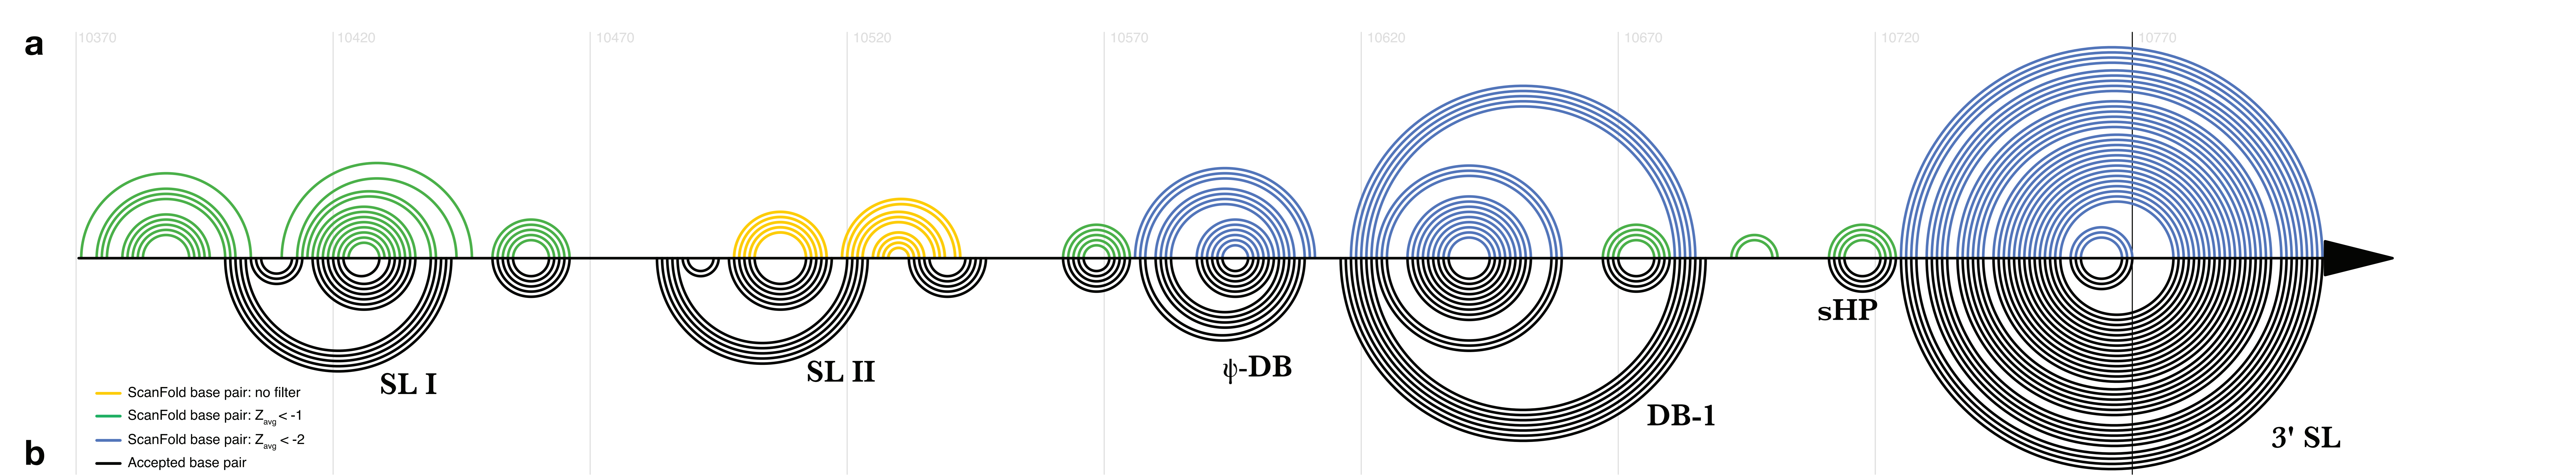

Supplement: Supplemental_Fig_S2_3UTR-01.pdf [file Supplemental_Fig_S2_3UTR-01.pdf]
